# Supplementary material
Source: PubMed Central journal article supplement (PMC8716645)

A) KASP fluorescence data plot: 059-C54420\_p784

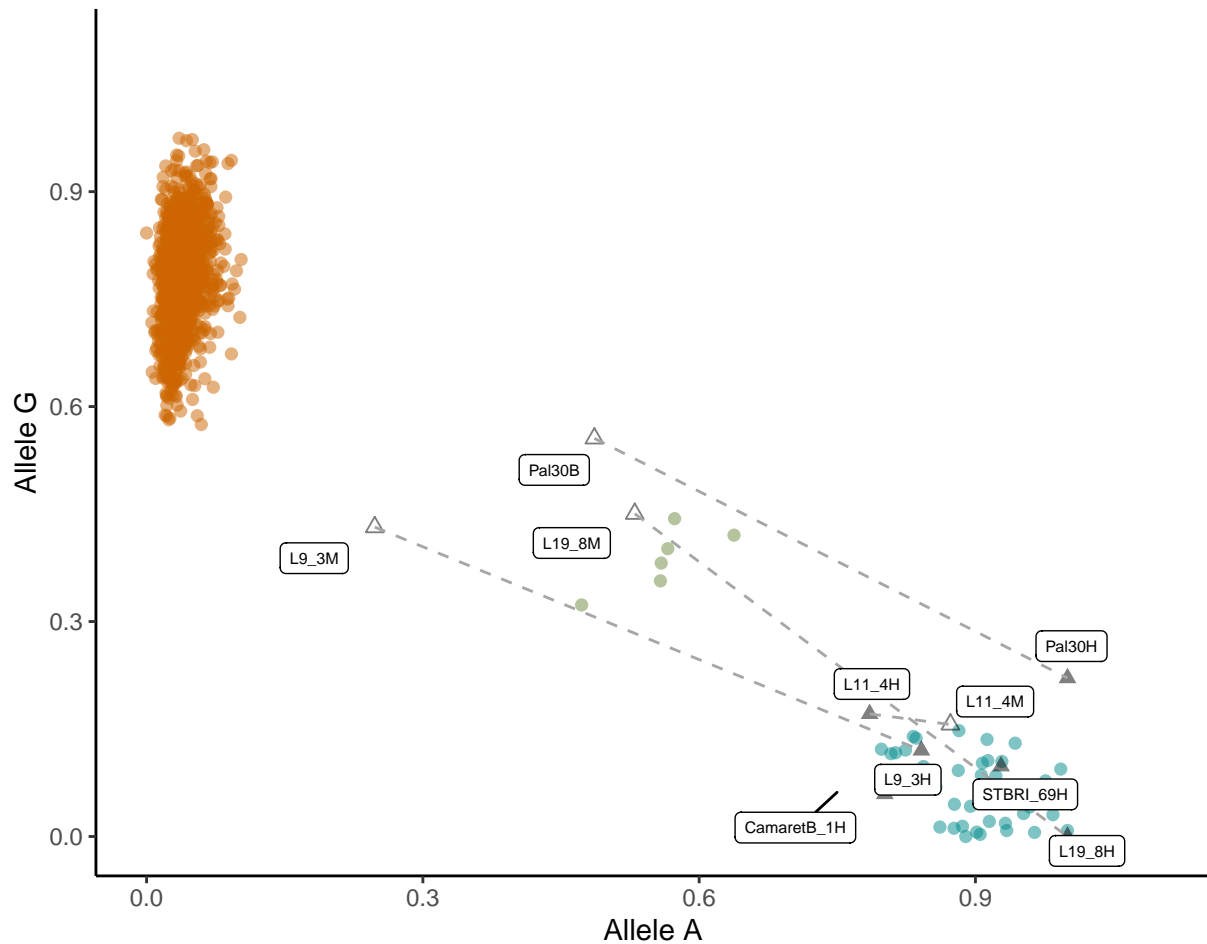

B) Correlation plot: 059-C54420\_p784

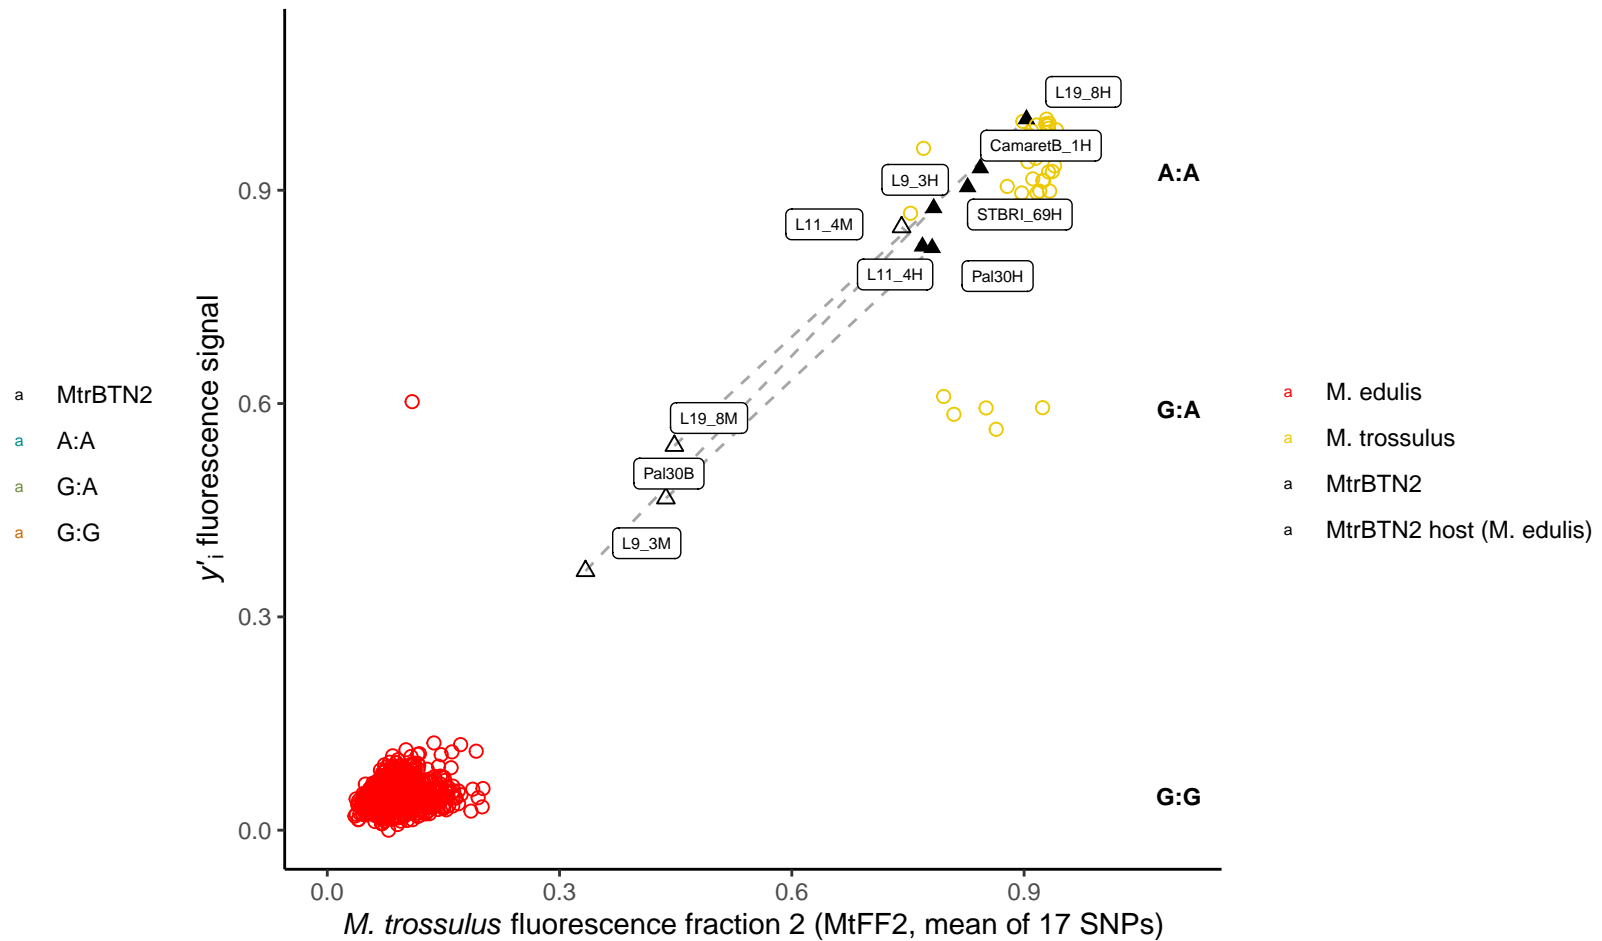

A) KASP fluorescence data plot: 035-C27467\_p175

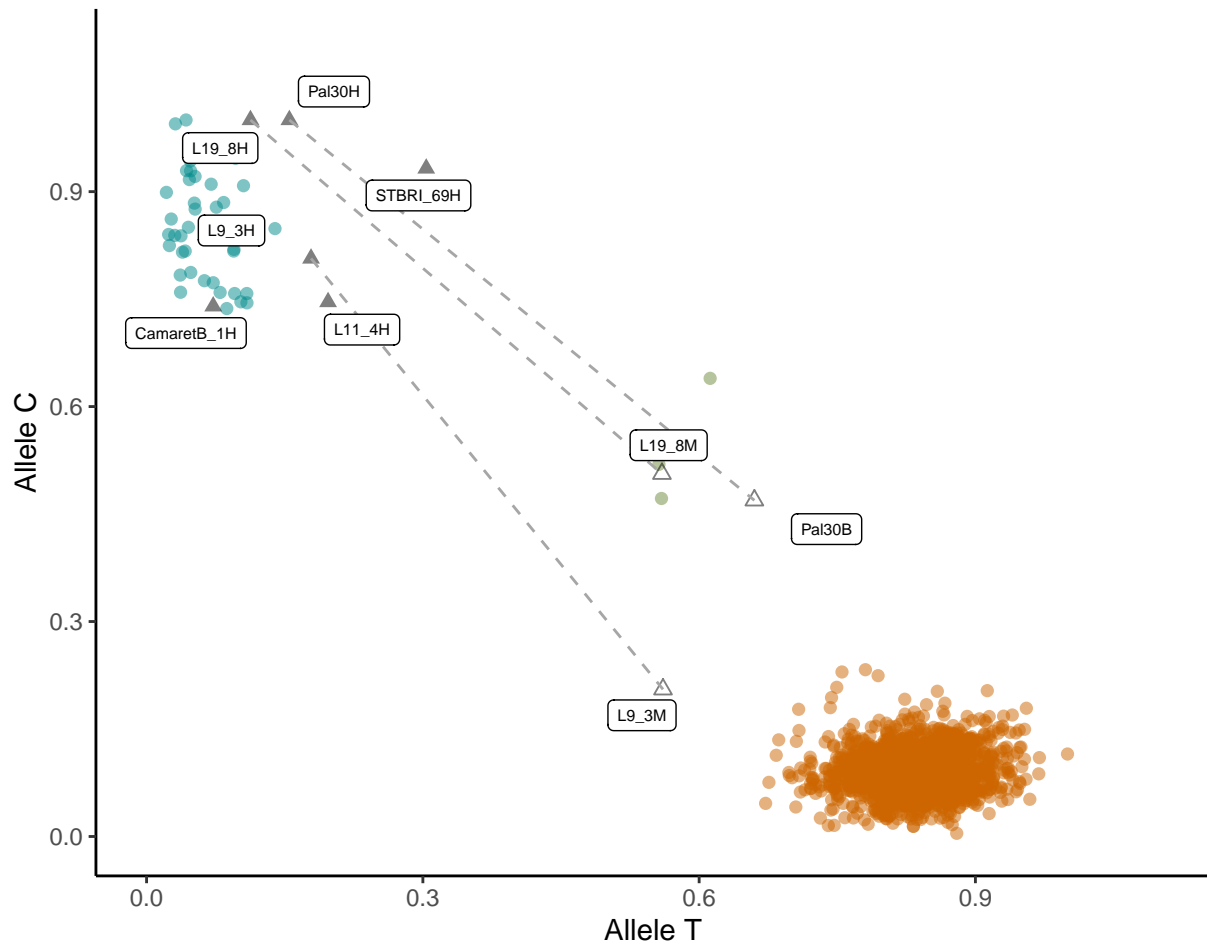

B) Correlation plot: 035-C27467\_p175

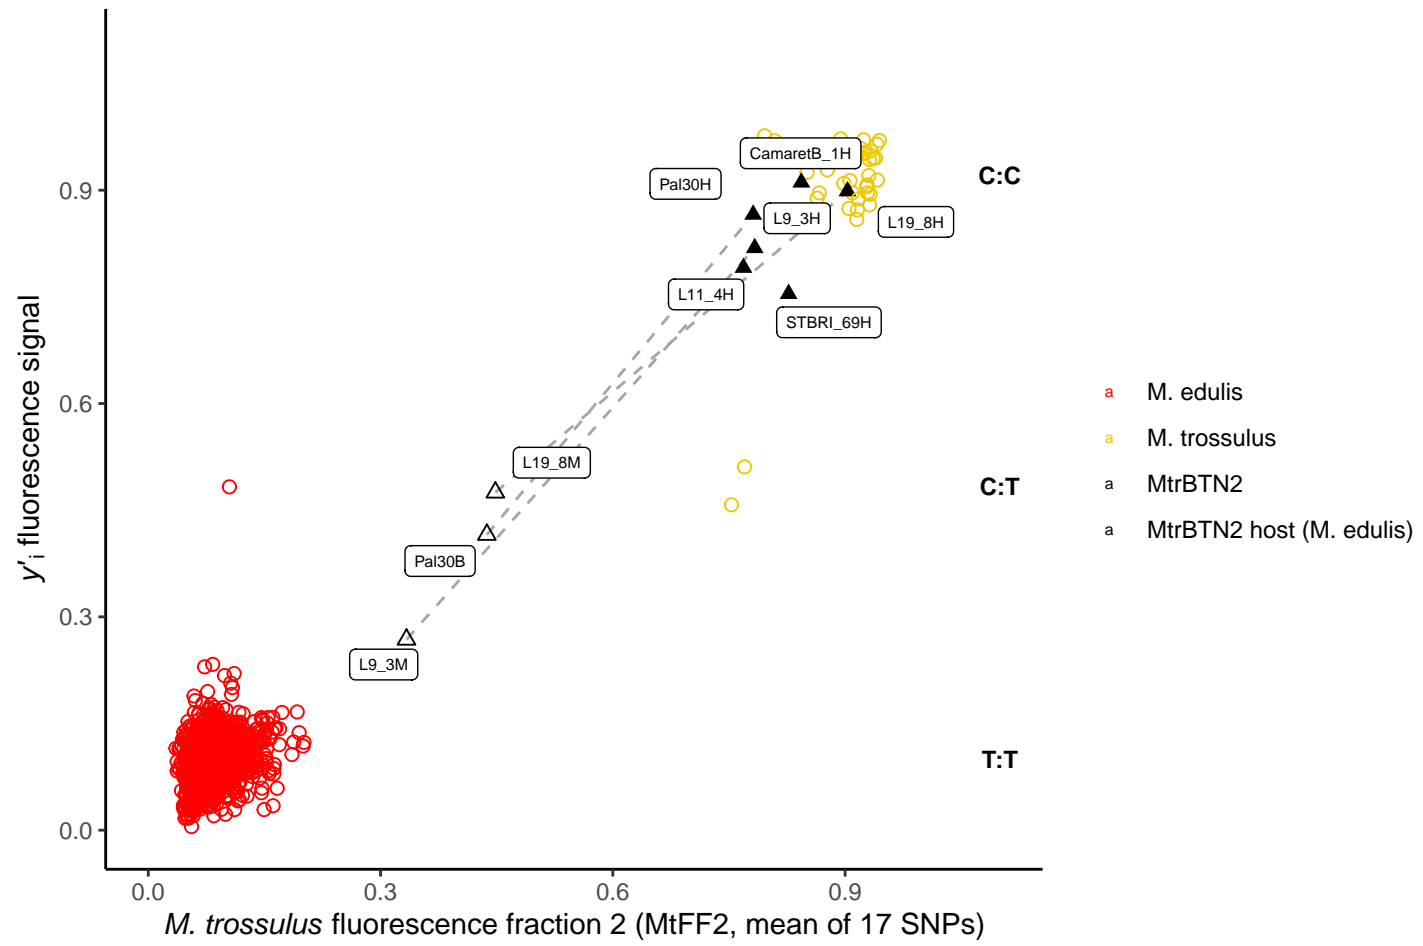

A) KASP fluorescence data plot: 088-gi\_223020458

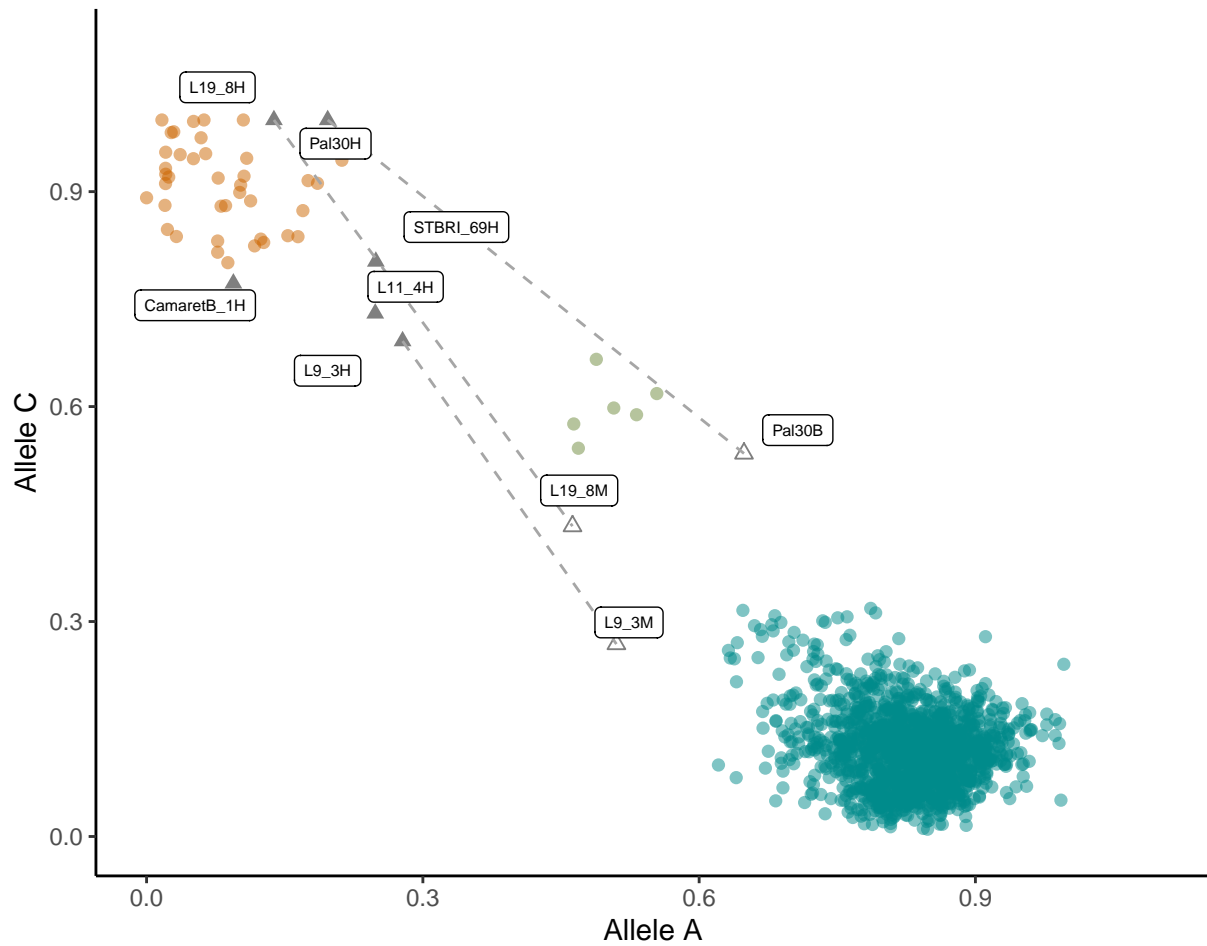

B) Correlation plot: 088-gi\_223020458

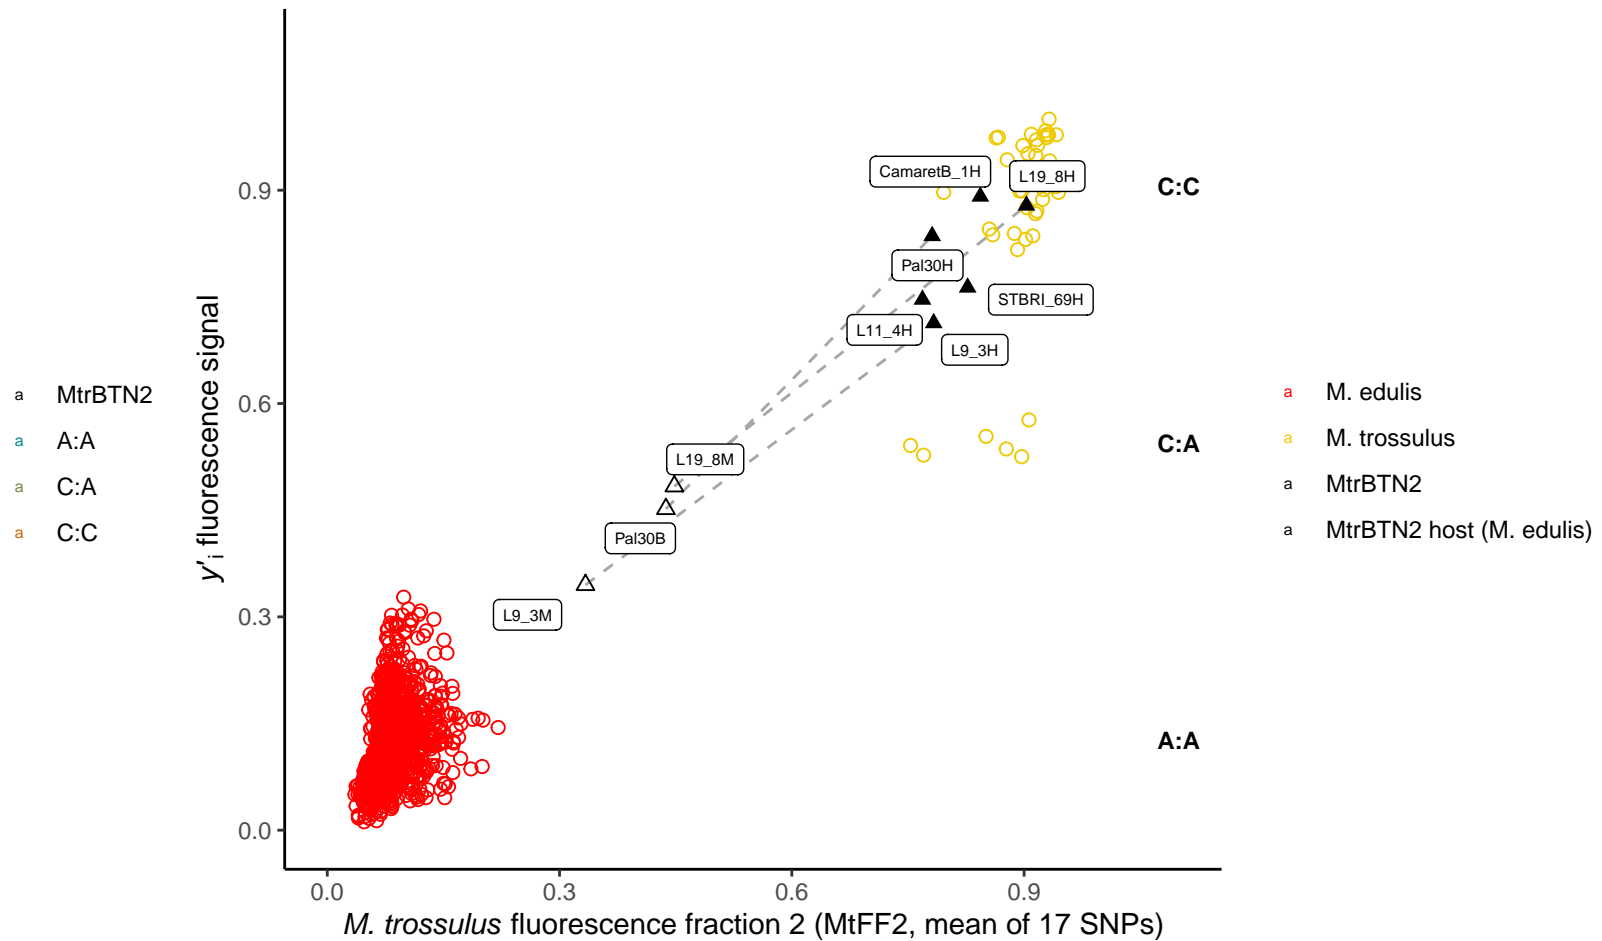

A) KASP fluorescence data plot: 404-gi\_384575681

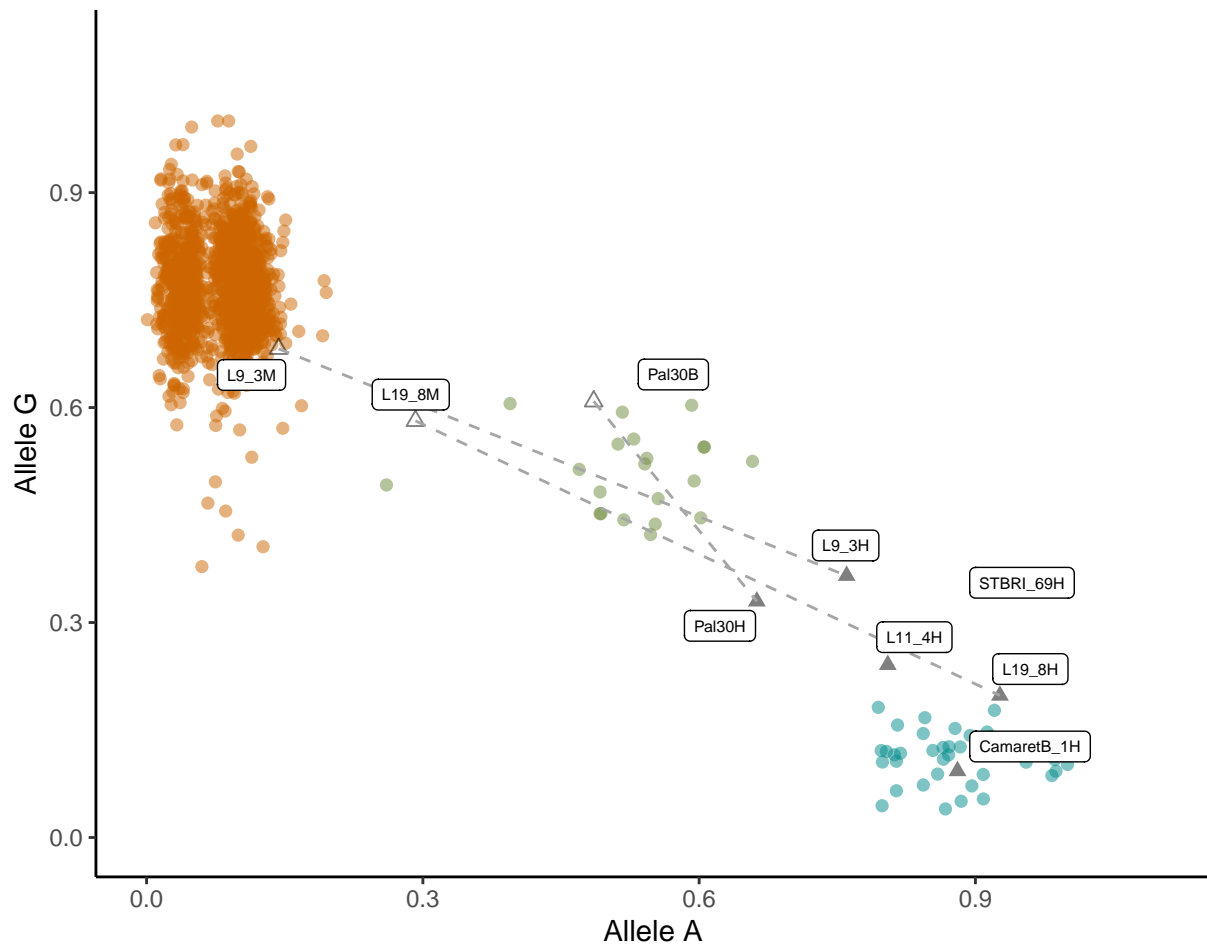

B) Correlation plot: 404-gi\_384575681

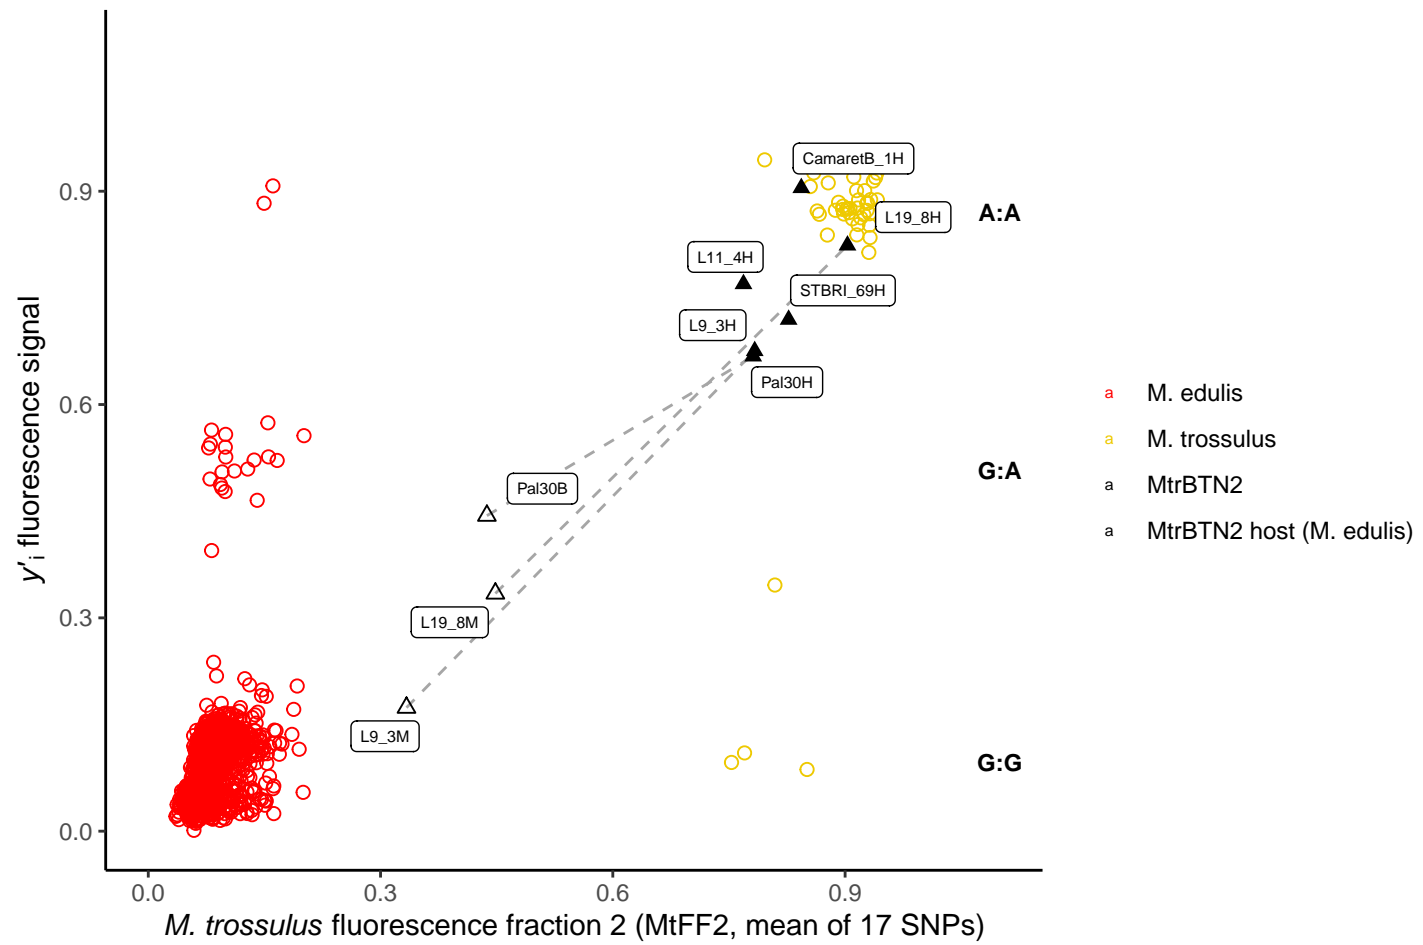

A) KASP fluorescence data plot: 802-C9777\_GA36C\_p1086

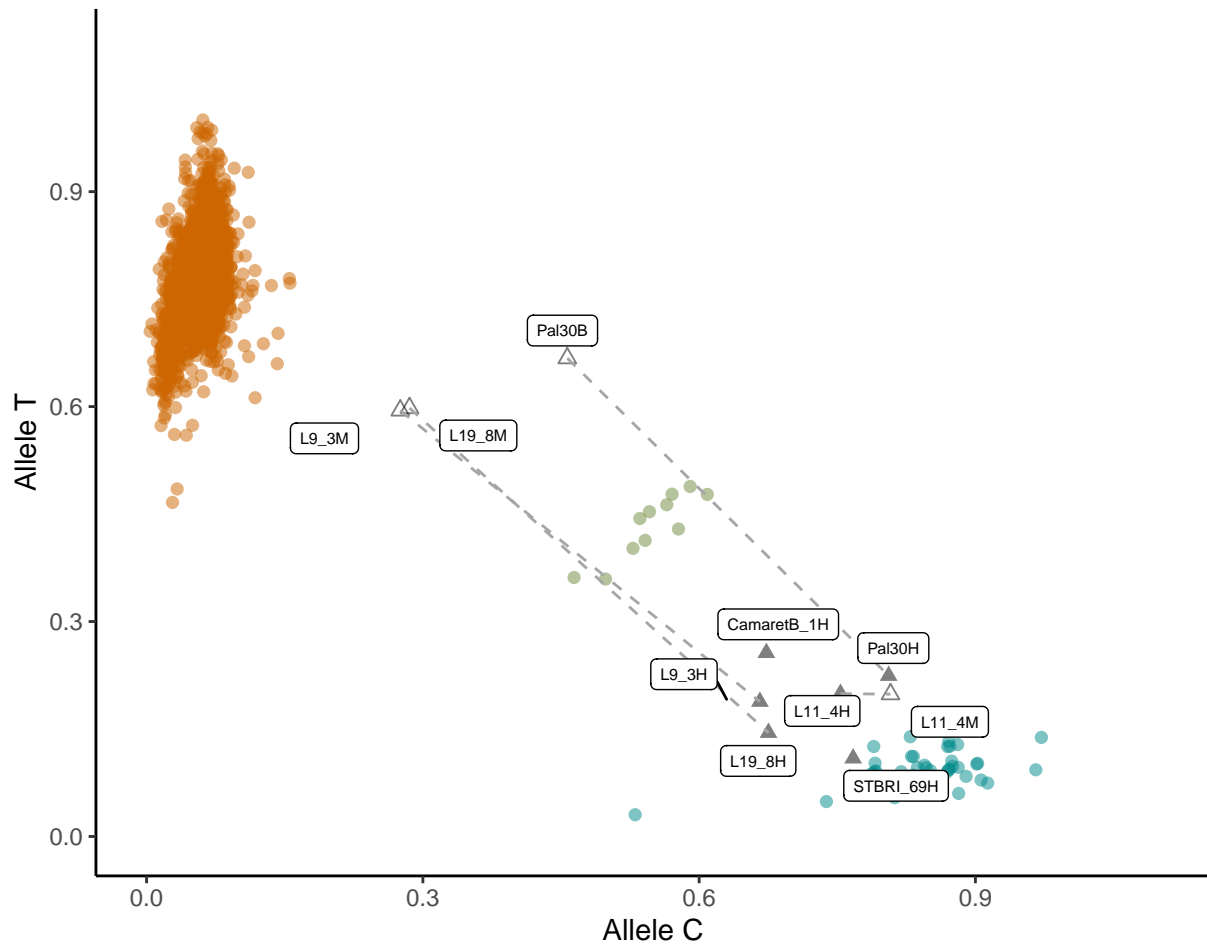

B) Correlation plot: 802-C9777\_GA36C\_p1086

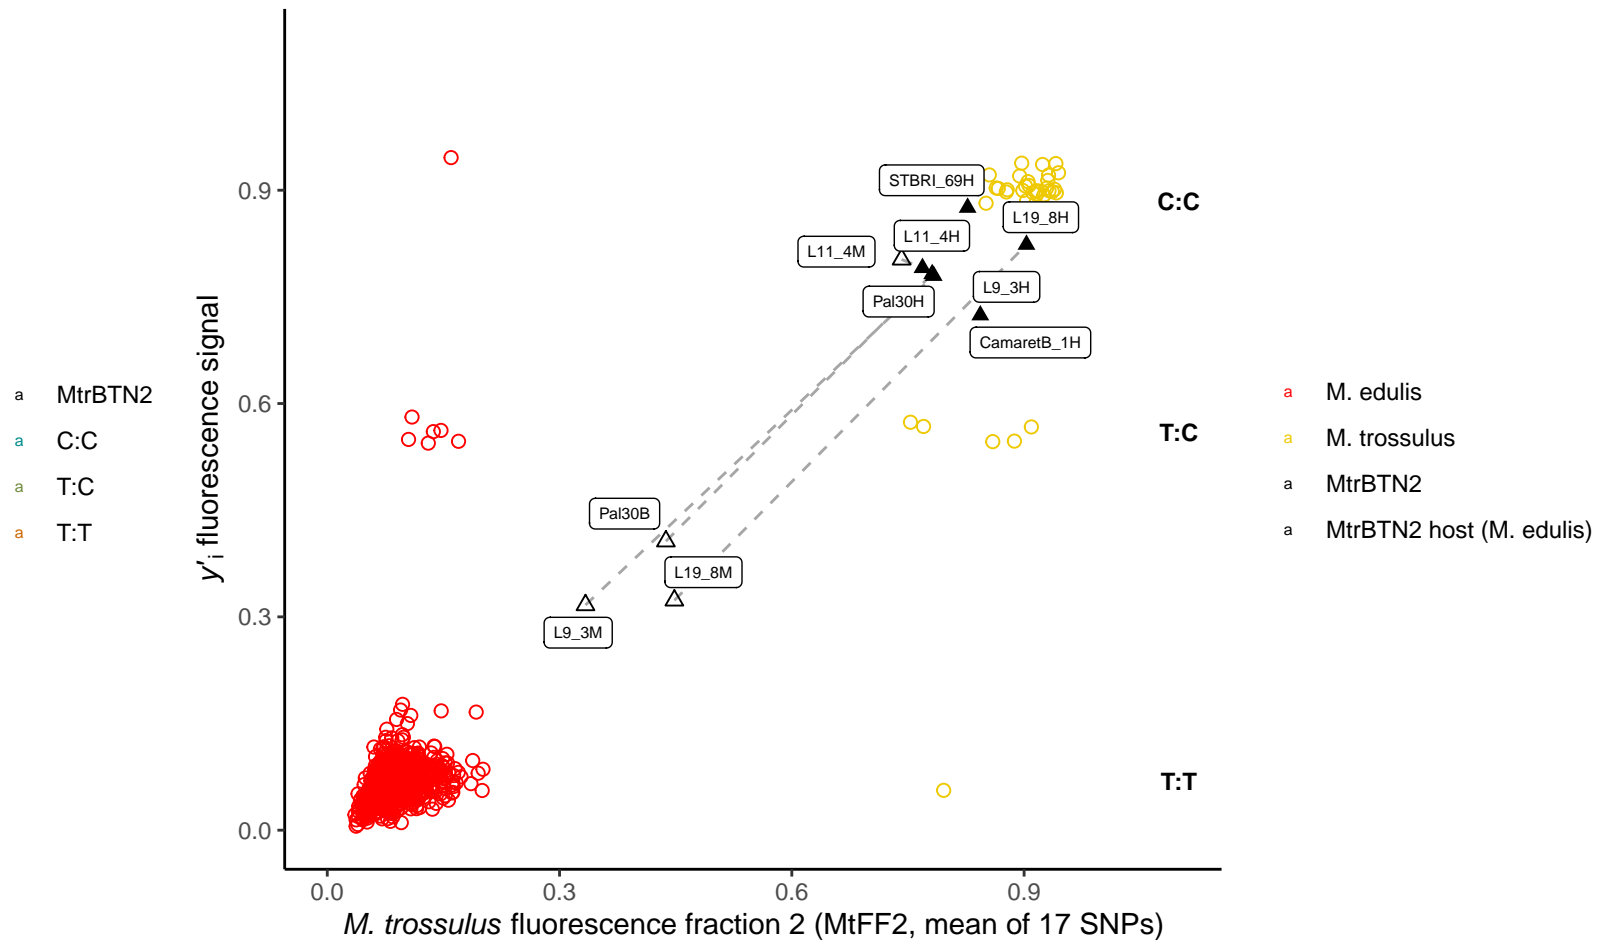

A) KASP fluorescence data plot: 801-C6813\_GA36C\_p732

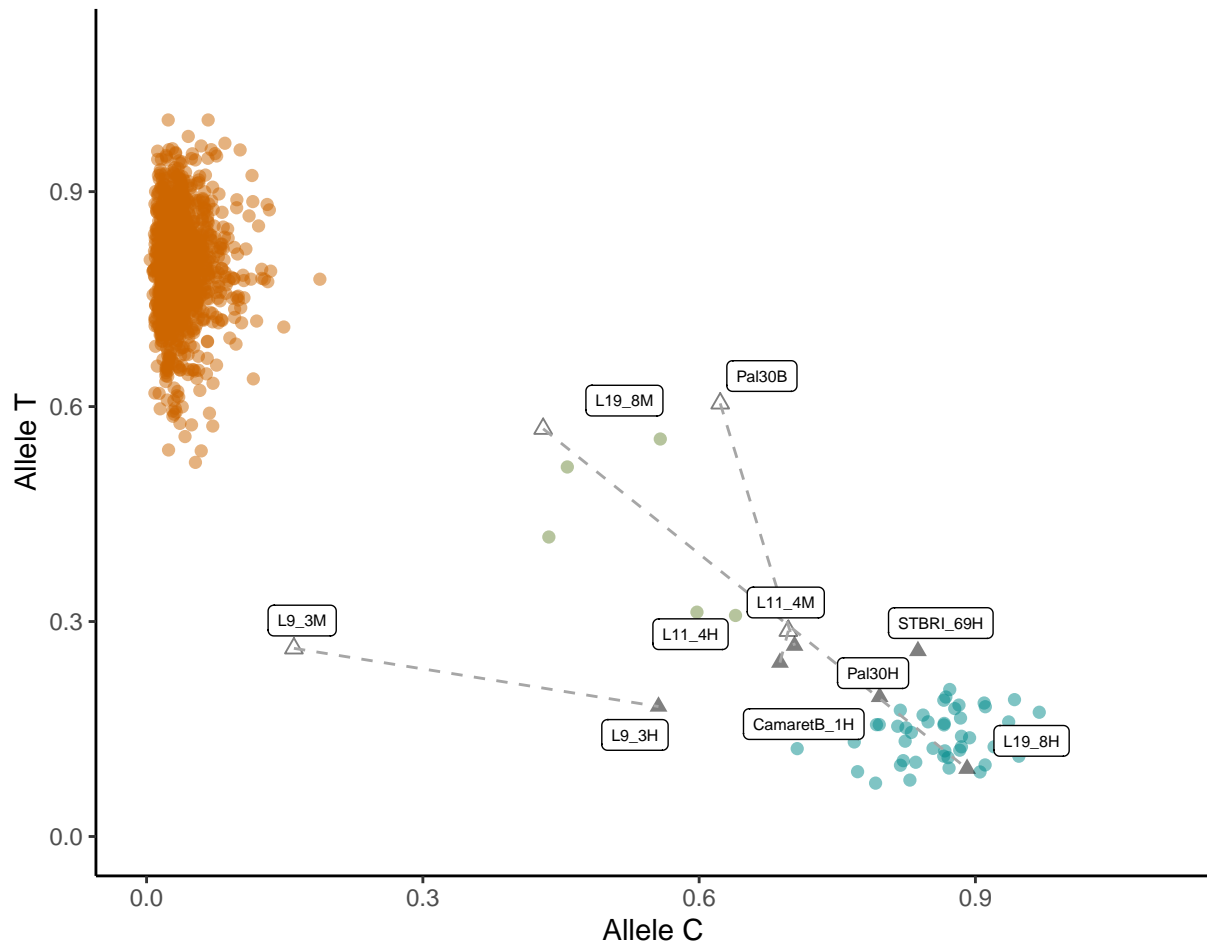

B) Correlation plot: 801-C6813\_GA36C\_p732

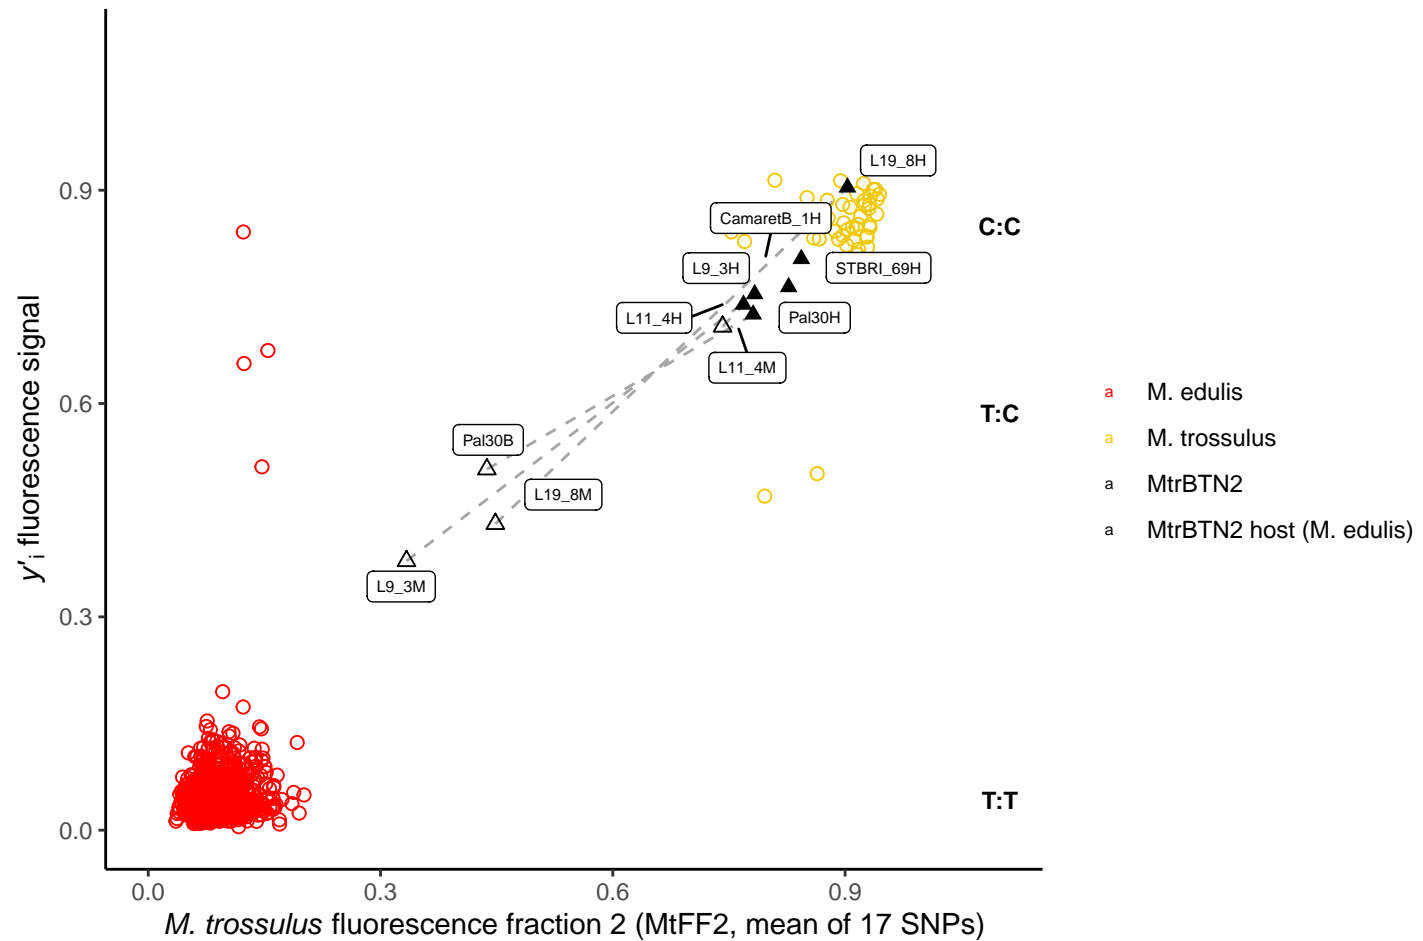

A) KASP fluorescence data plot: 138-abys\_C1219\_p217

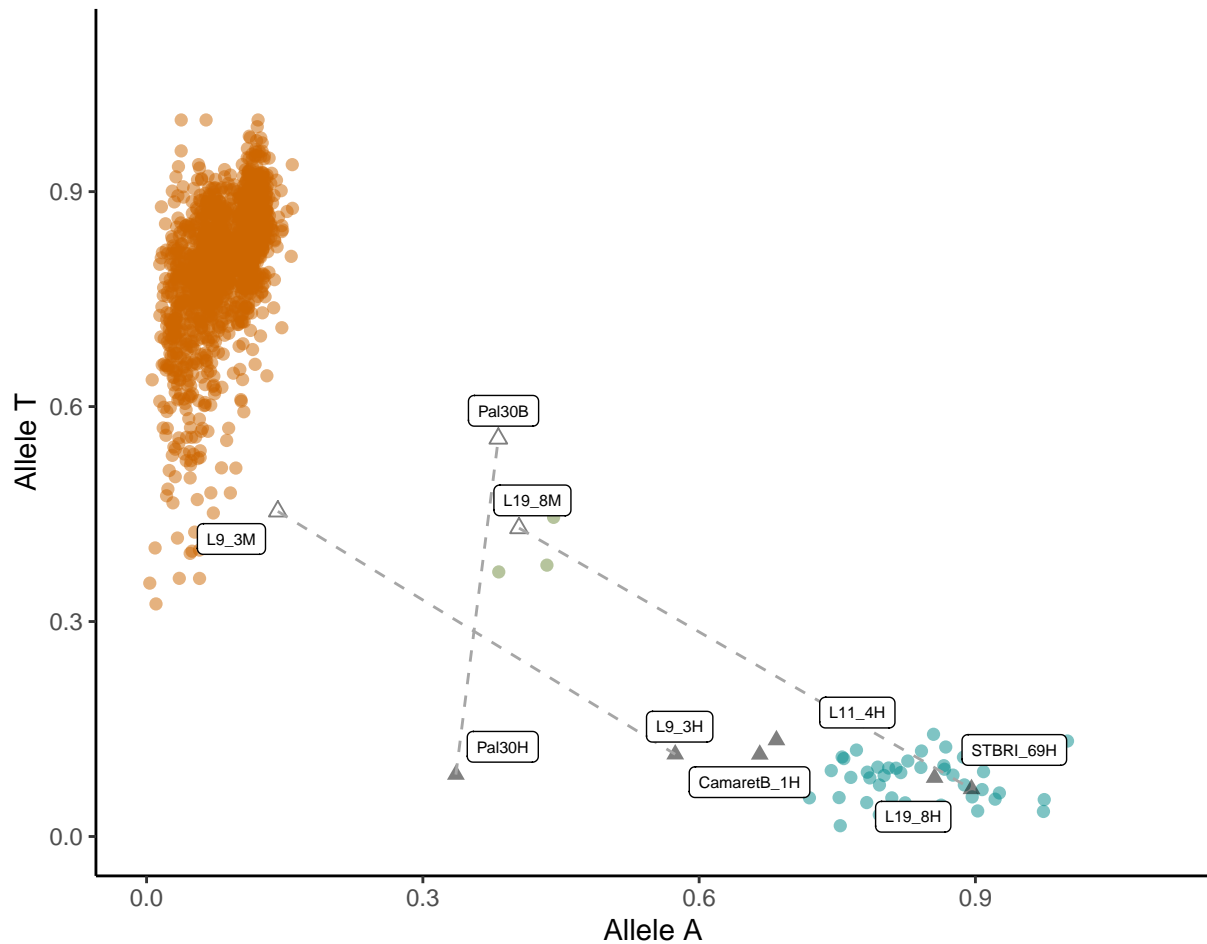

B) Correlation plot: 138-abys\_C1219\_p217

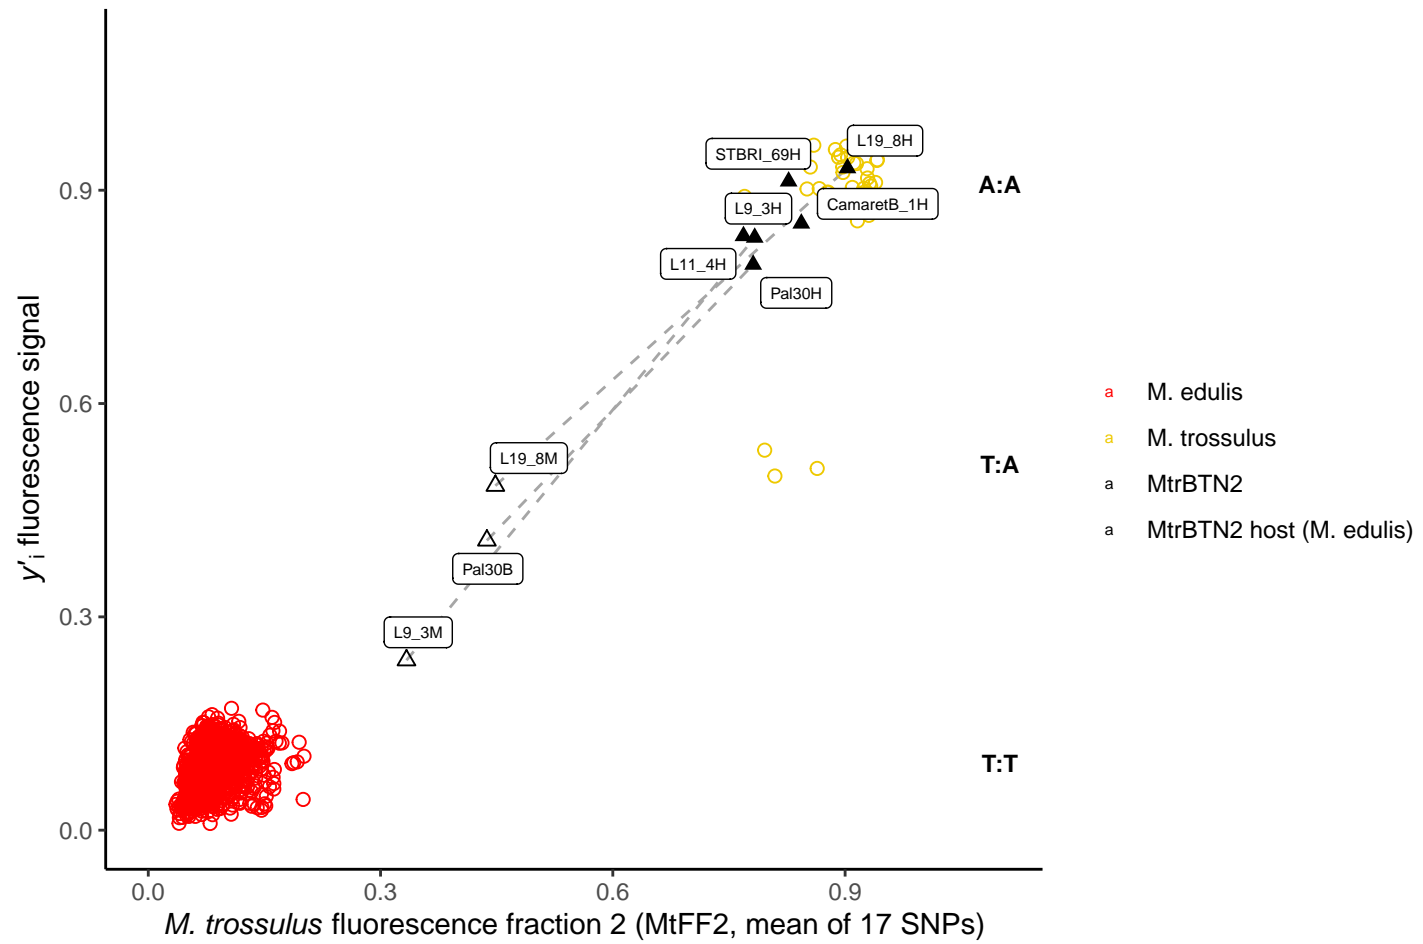

A) KASP fluorescence data plot: 002-C10366\_p321

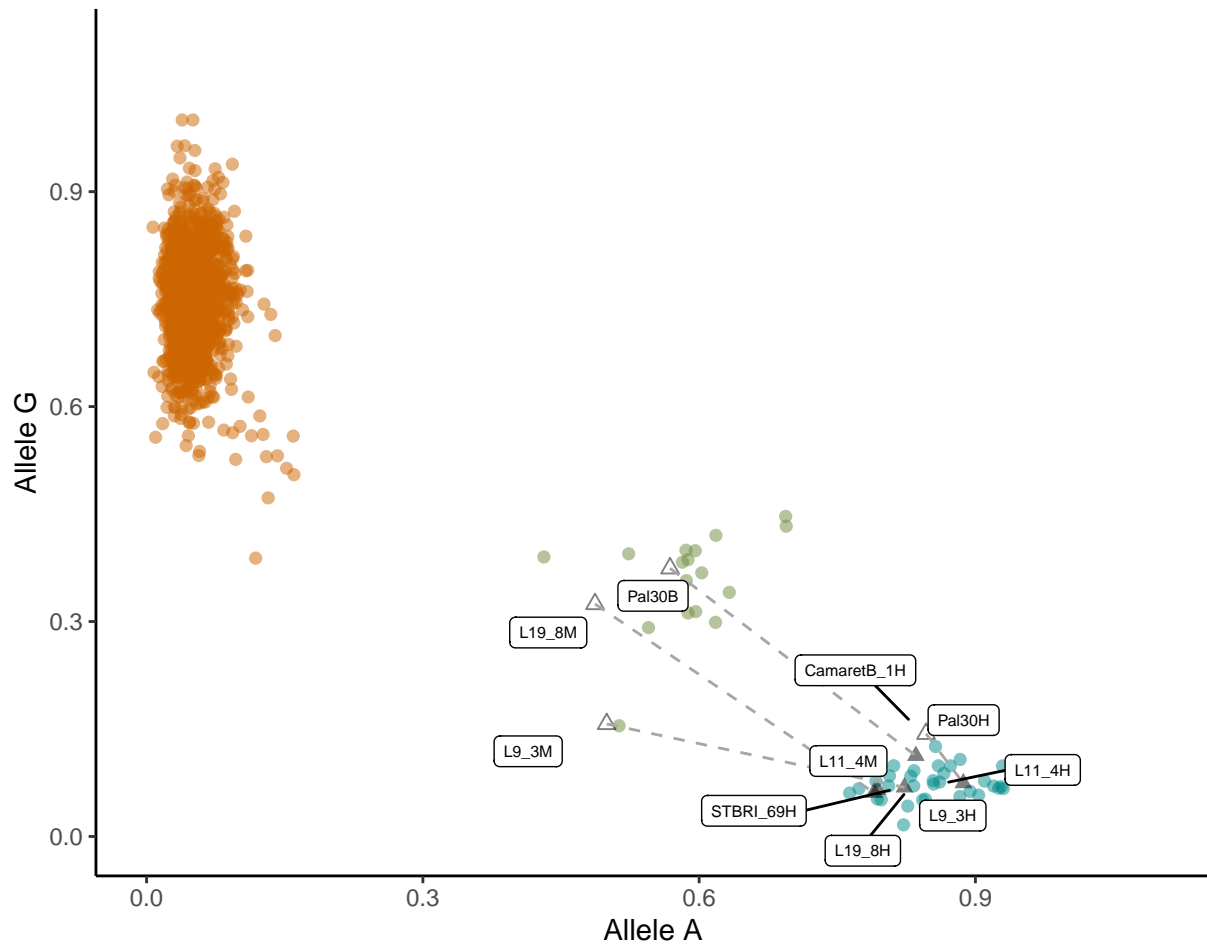

B) Correlation plot: 002-C10366\_p321

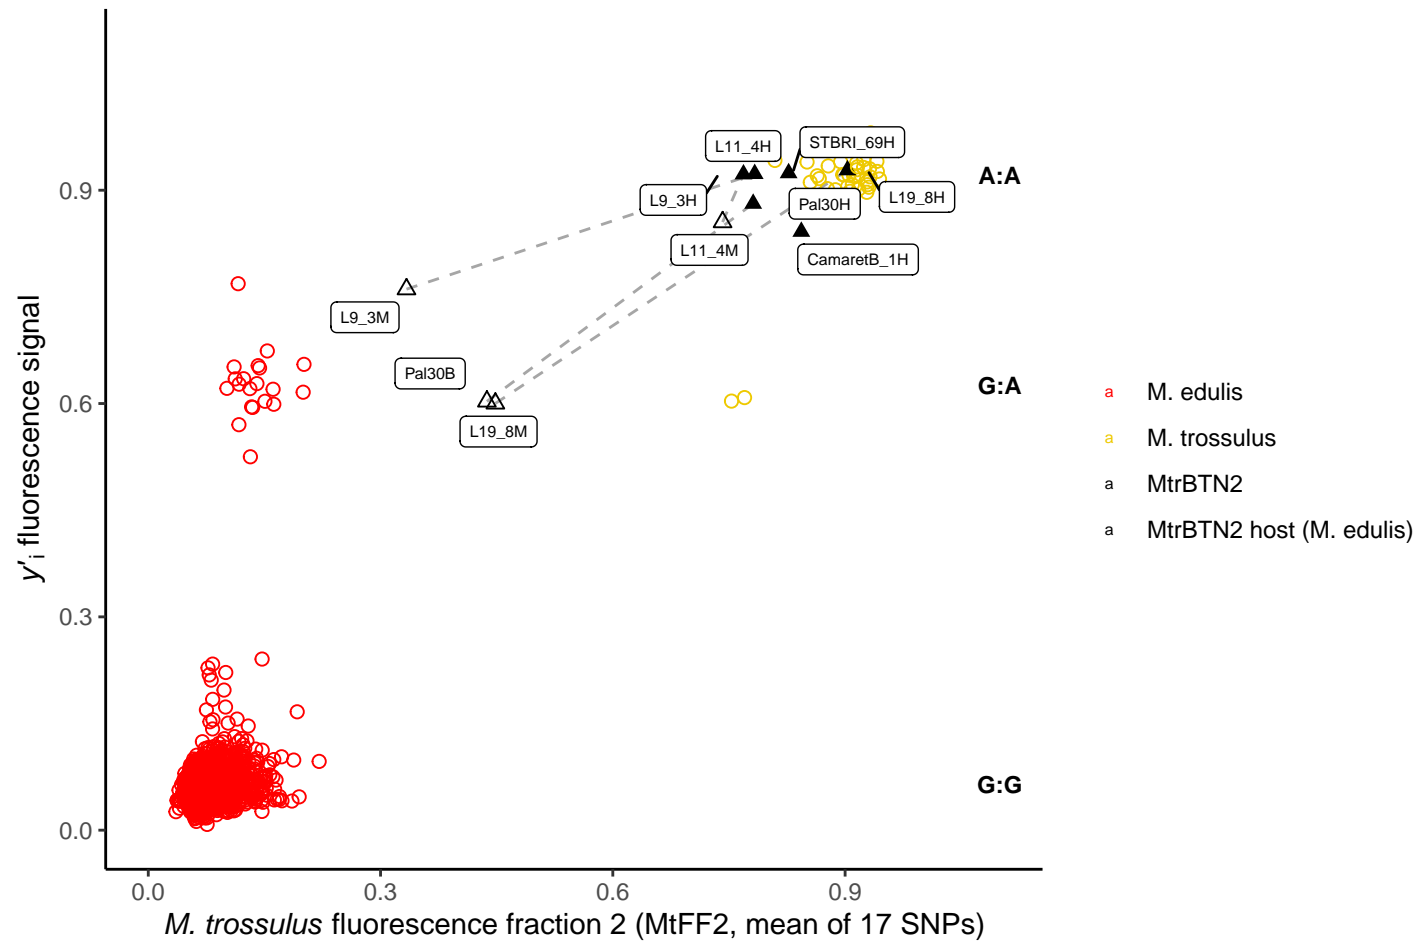



A) KASP fluorescence data plot: 610-loc094\_id166\_p10

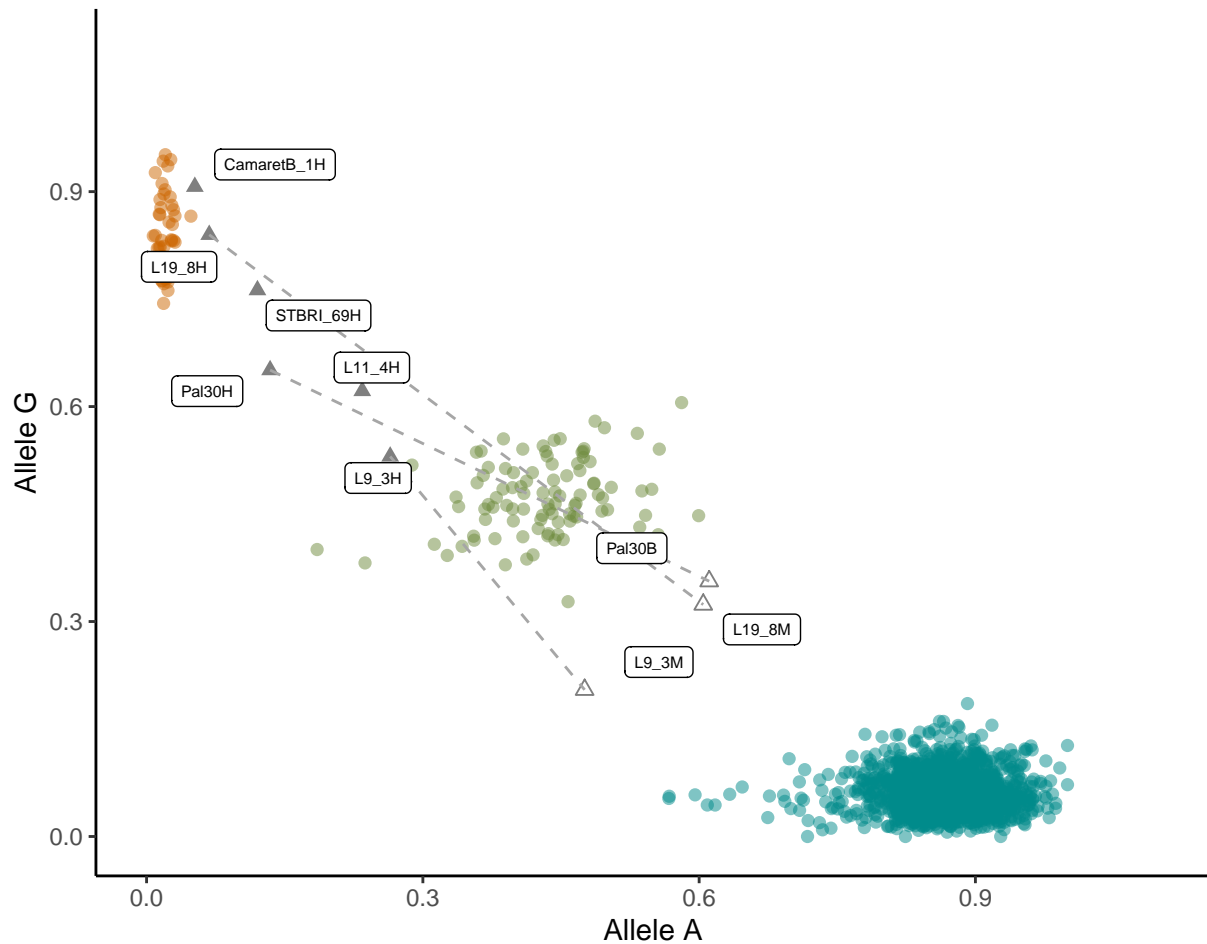

B) Correlation plot: 610-loc094\_id166\_p10

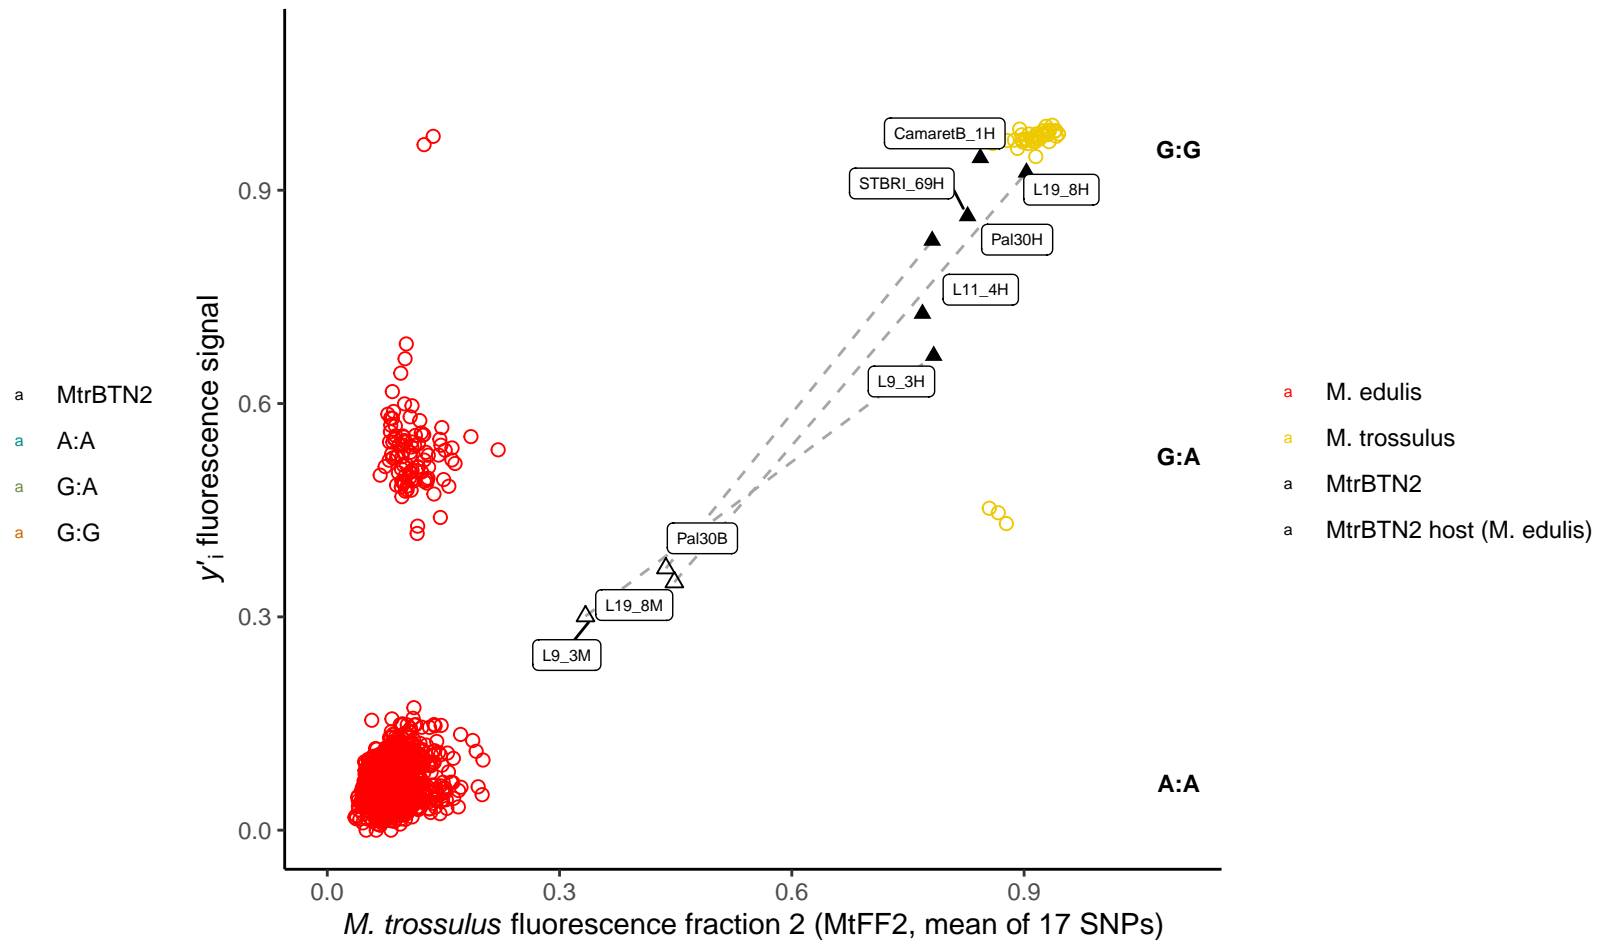

A) KASP fluorescence data plot: 417-gi\_387154958

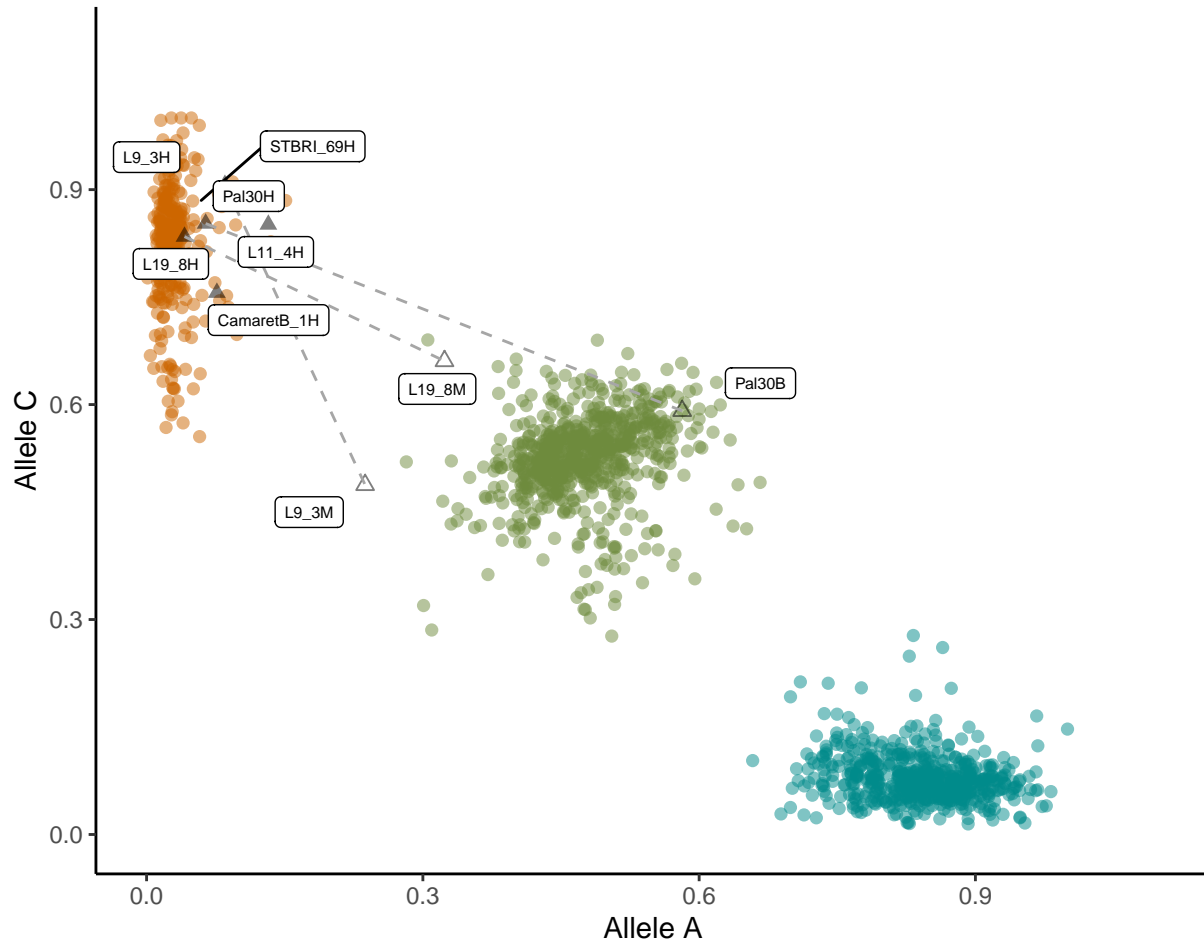

B) Correlation plot: 417-gi\_387154958

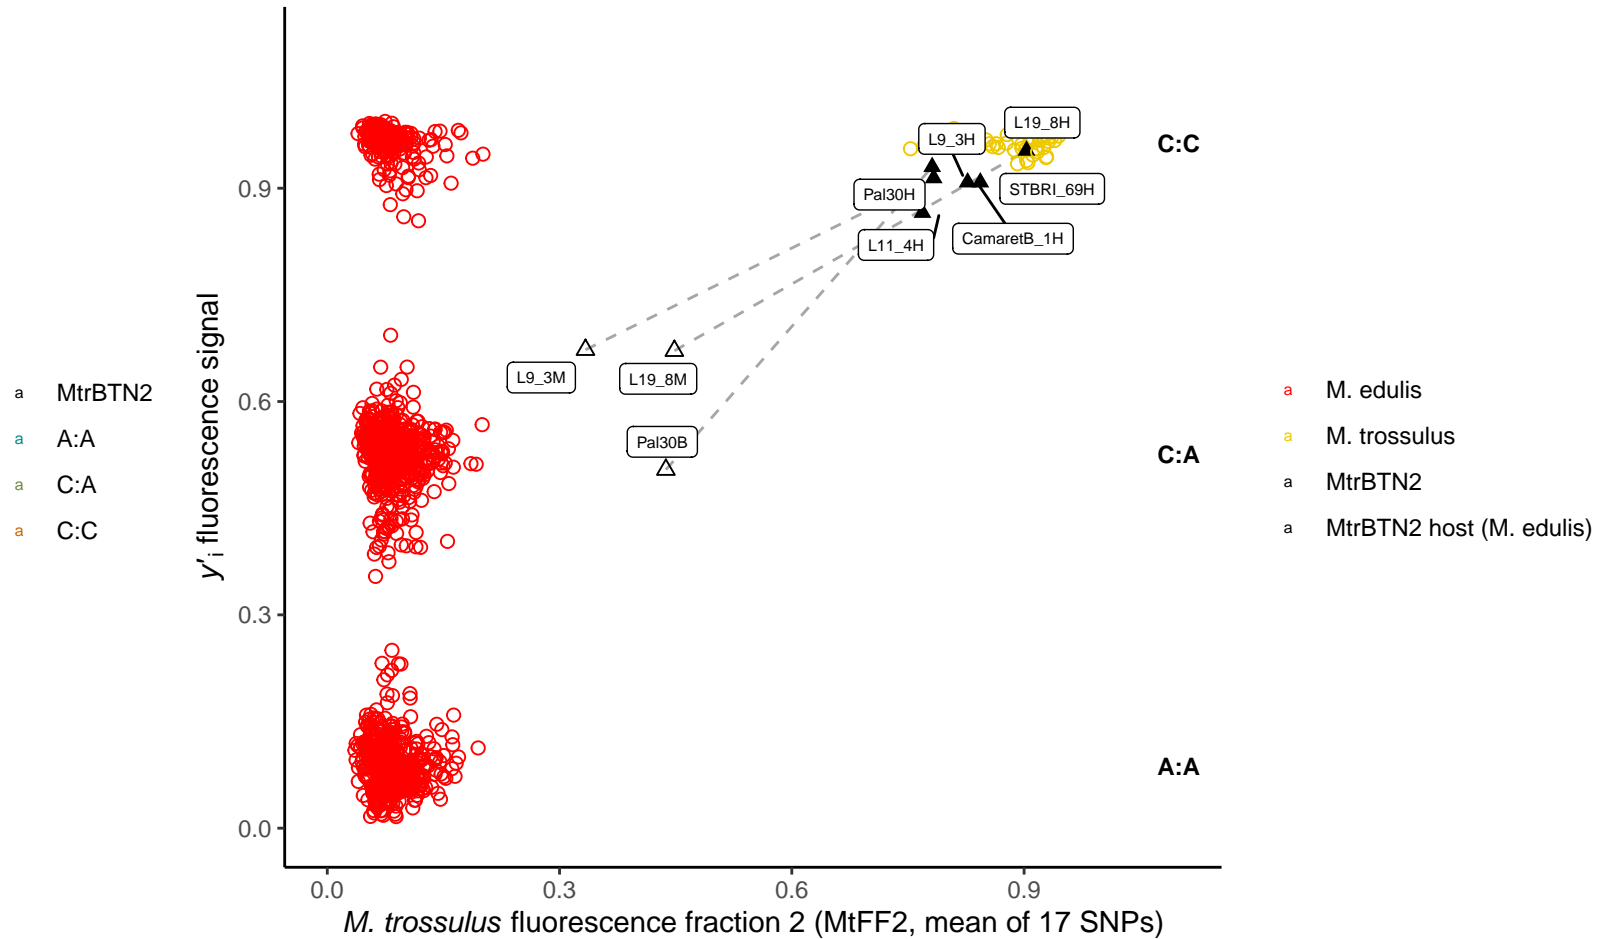

A) KASP fluorescence data plot: 070-C7841\_p713

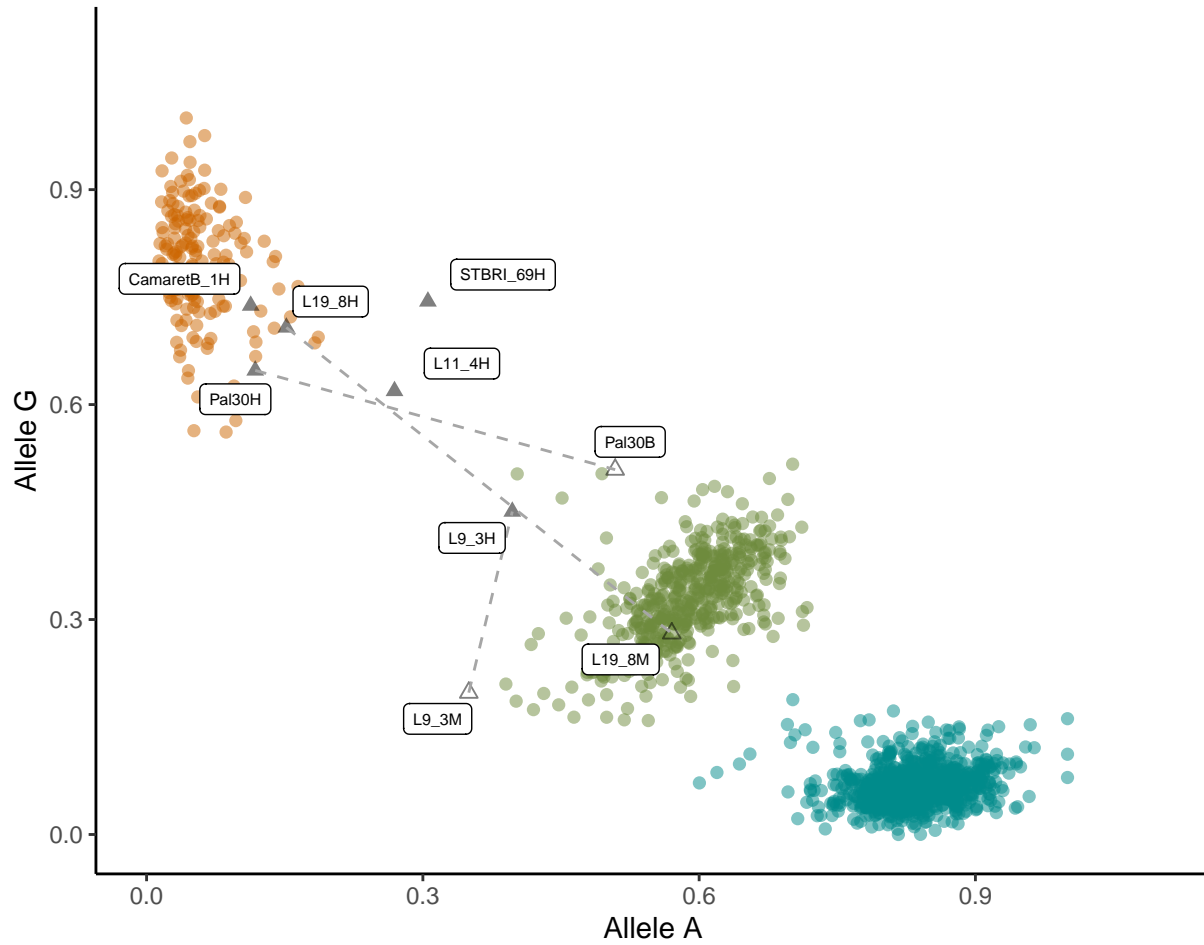

B) Correlation plot: 070-C7841\_p713

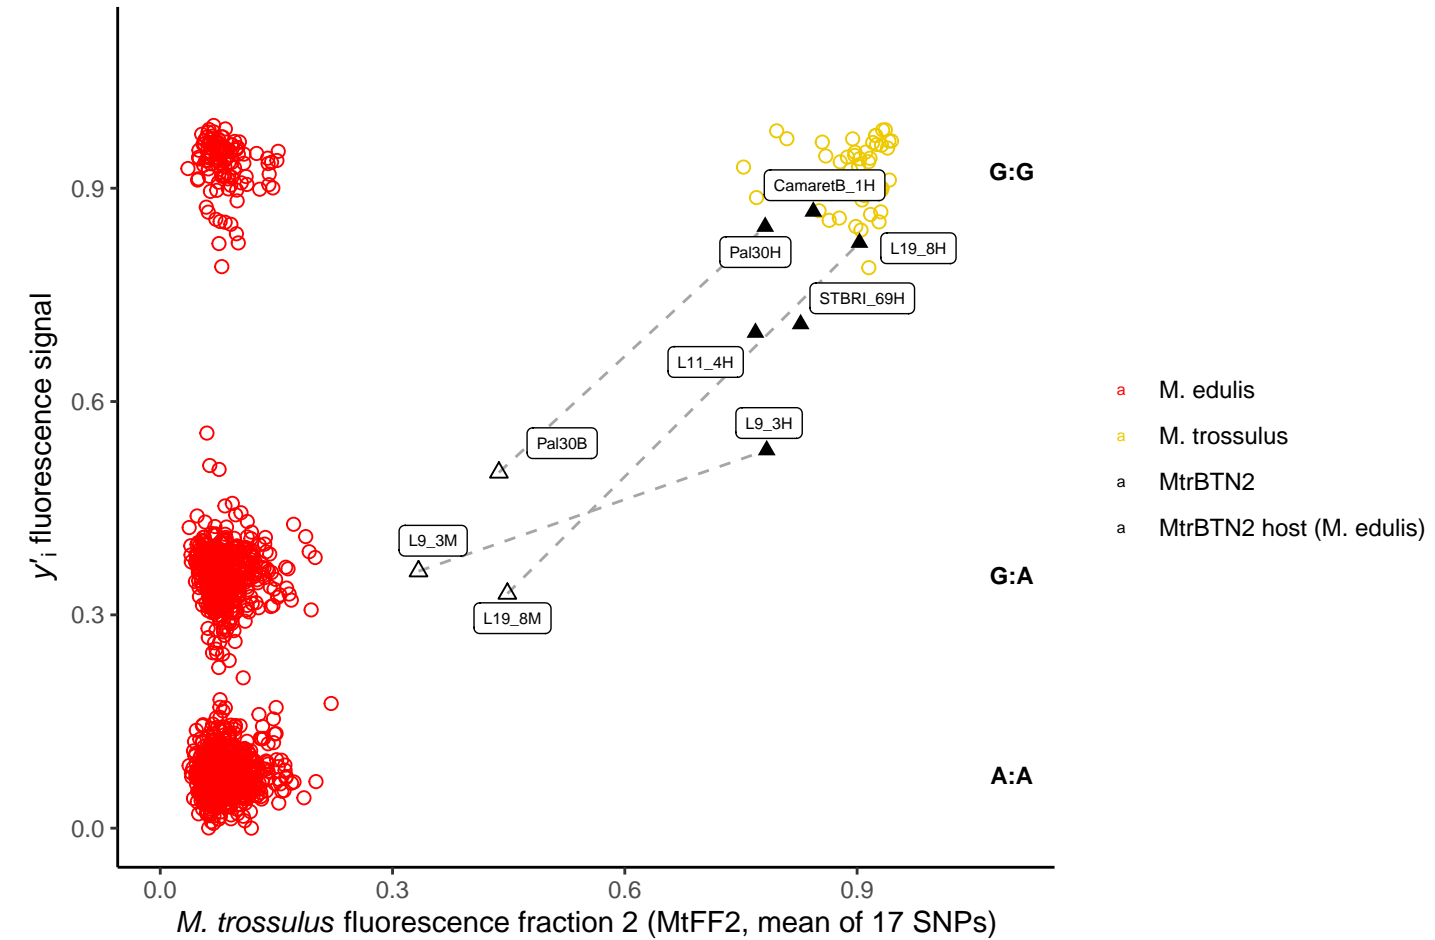

A) KASP fluorescence data plot: 017-C17424\_p75

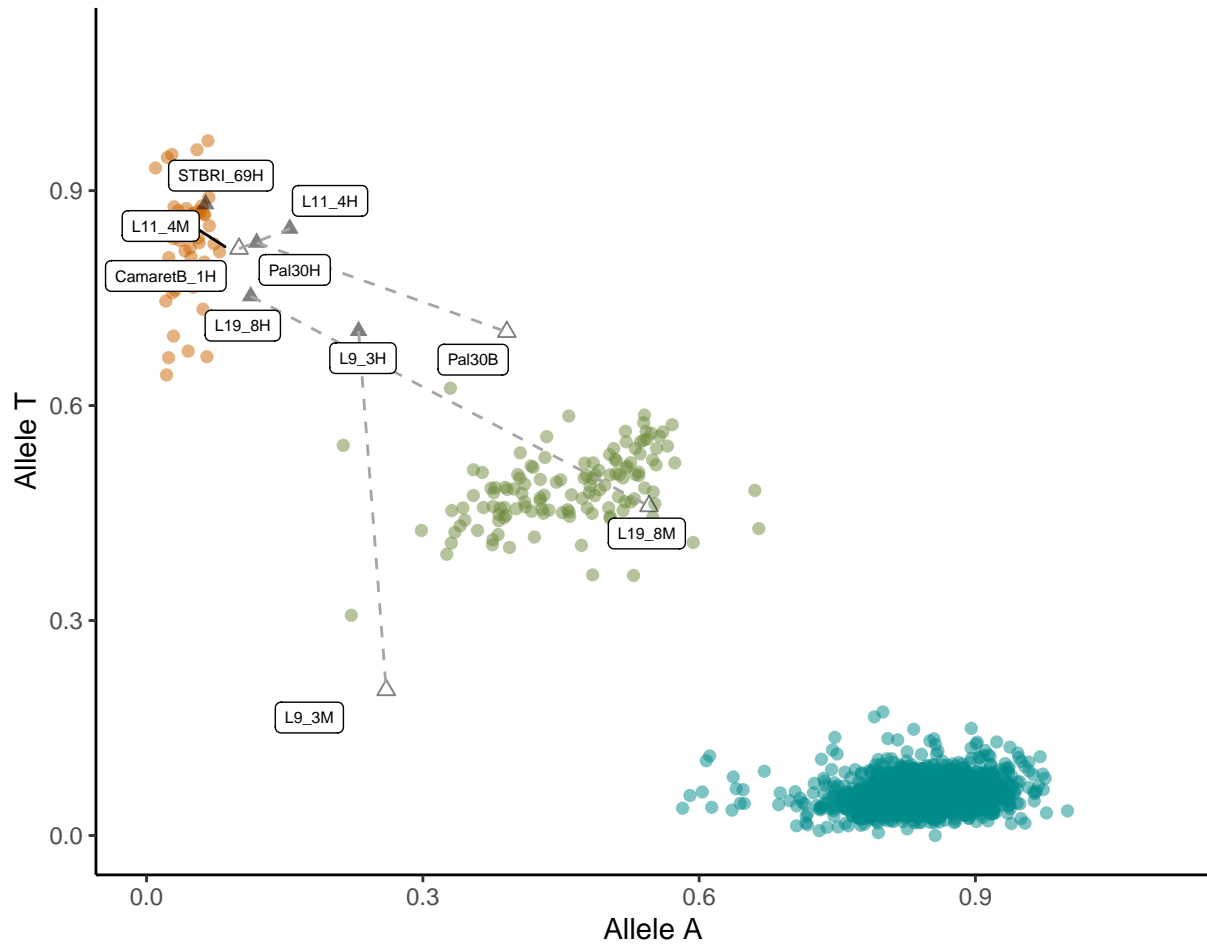

B) Correlation plot: 017-C17424\_p75

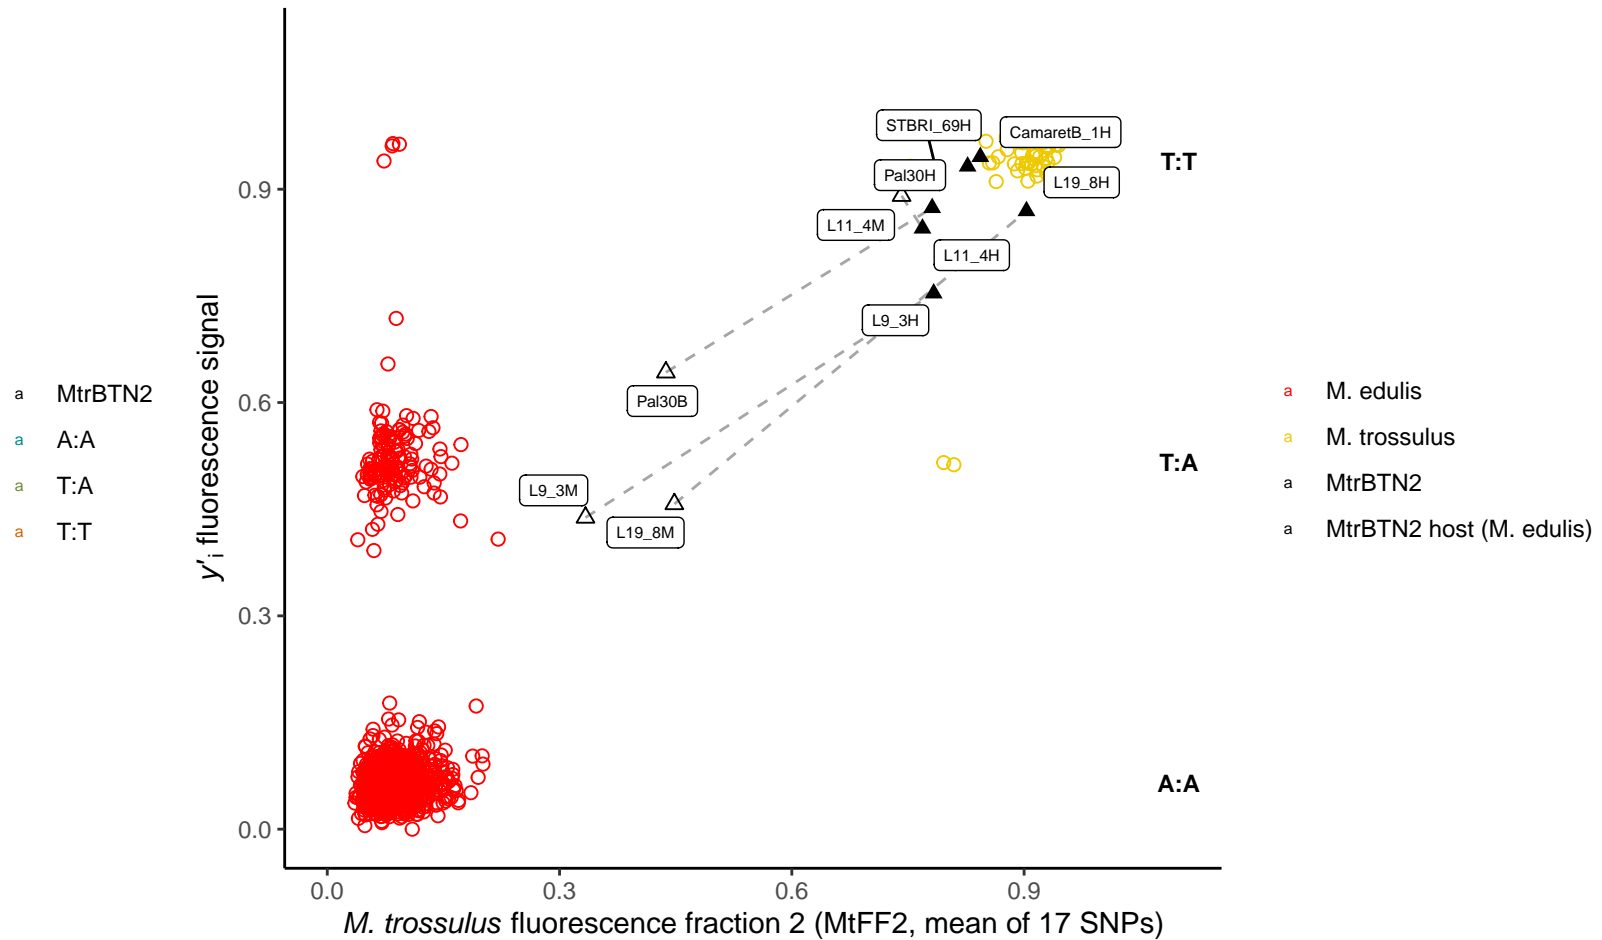



A) KASP fluorescence data plot: 117-gi\_38635427

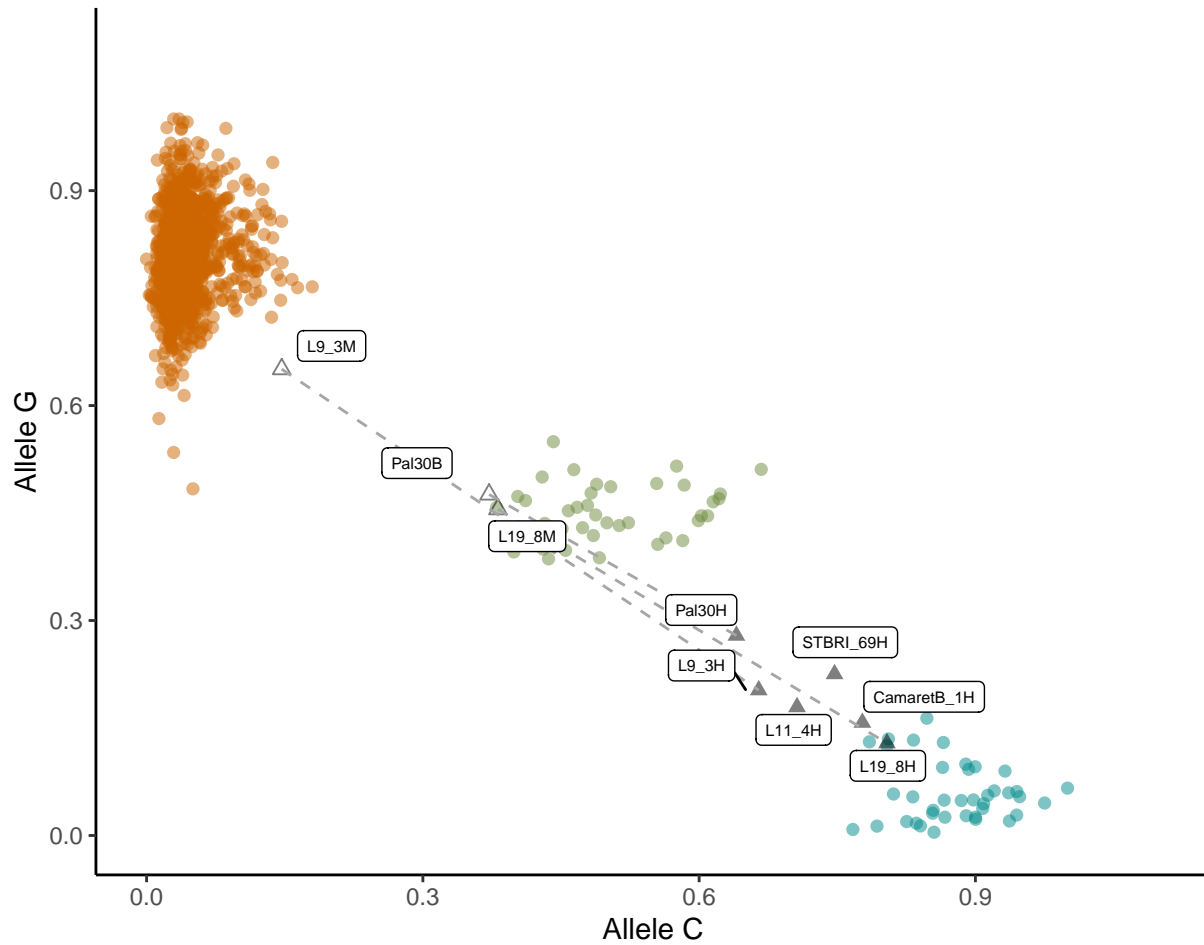

B) Correlation plot: 117-gi\_38635427

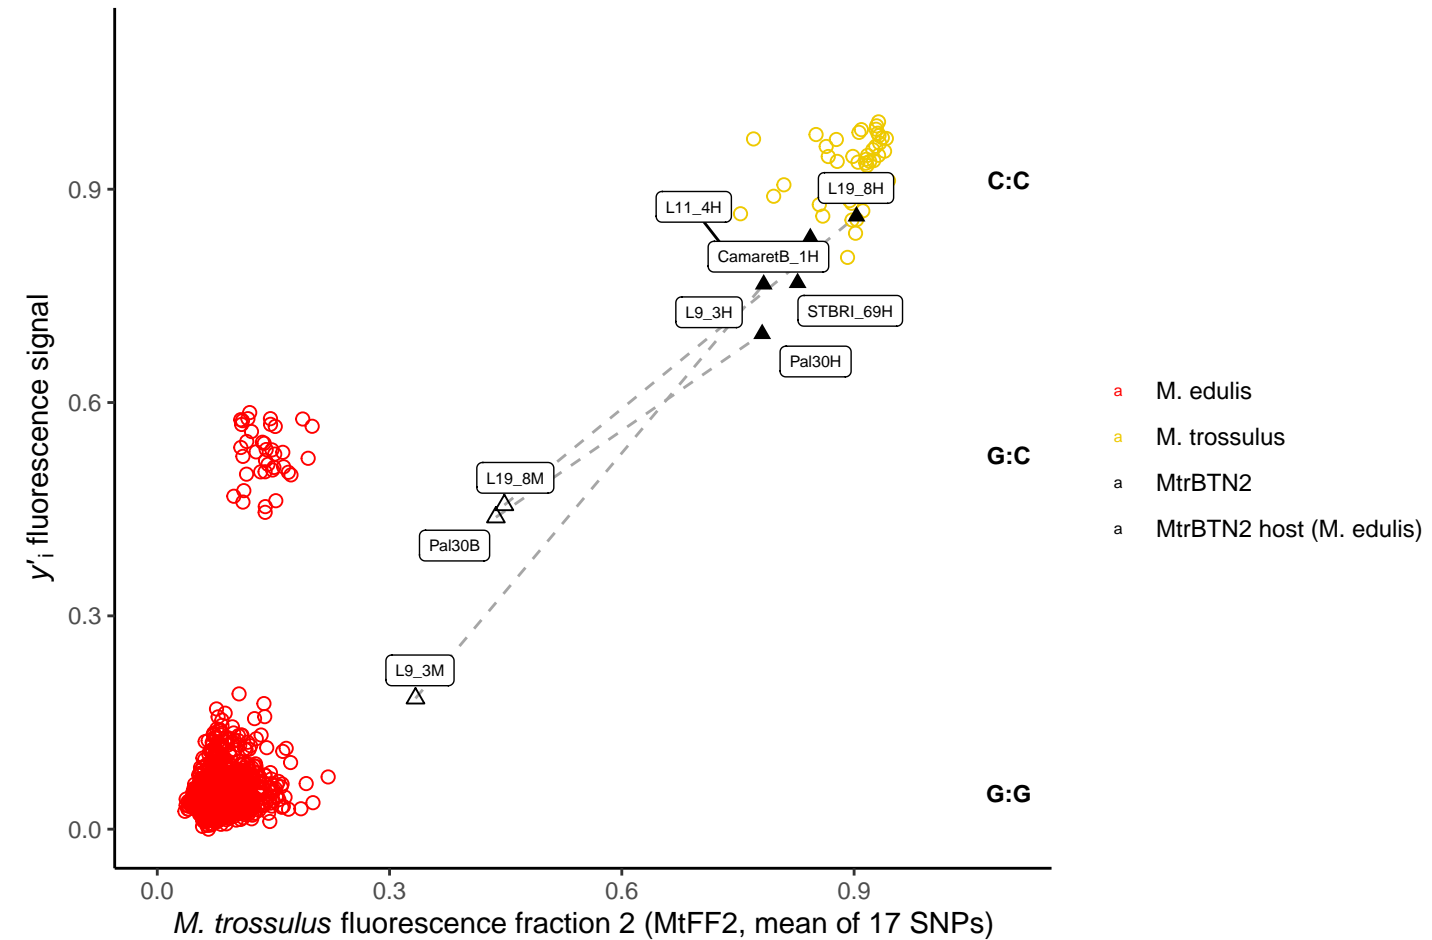

A) KASP fluorescence data plot: 015-C17324\_p1089

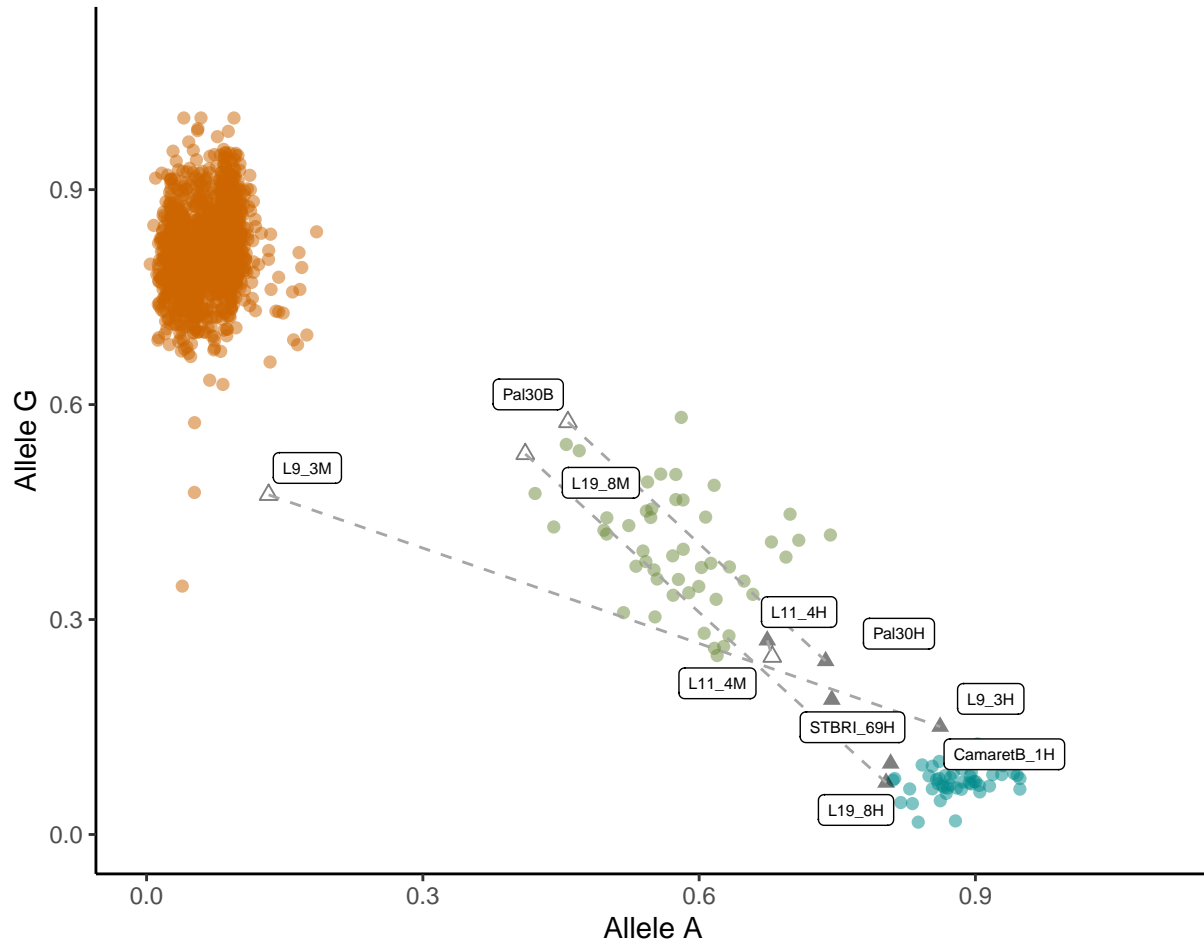

B) Correlation plot: 015-C17324\_p1089

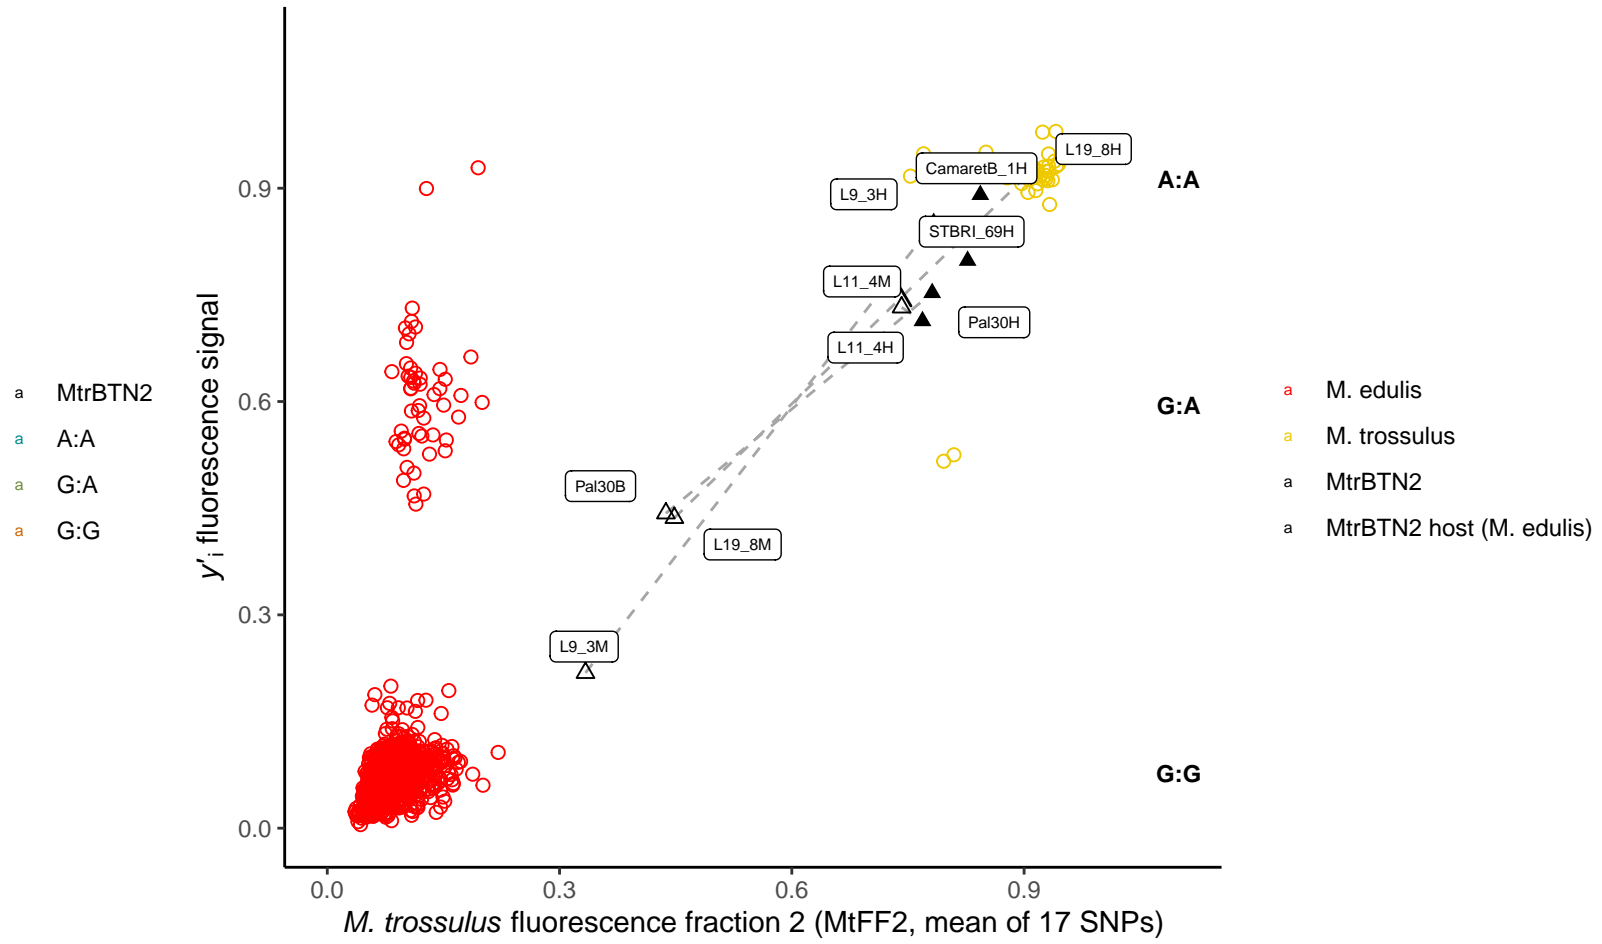

A) KASP fluorescence data plot: 063-C73535\_p928

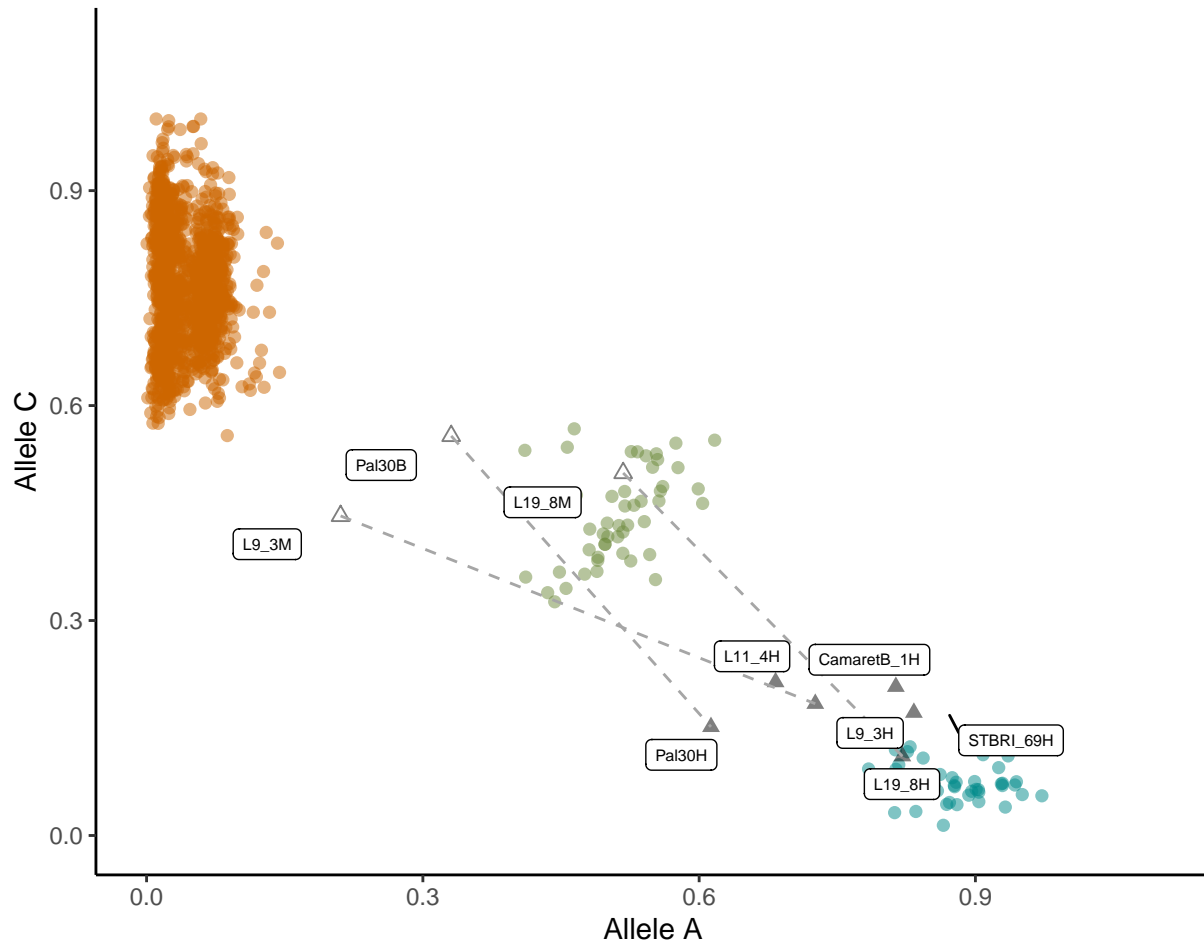

B) Correlation plot: 063-C73535\_p928

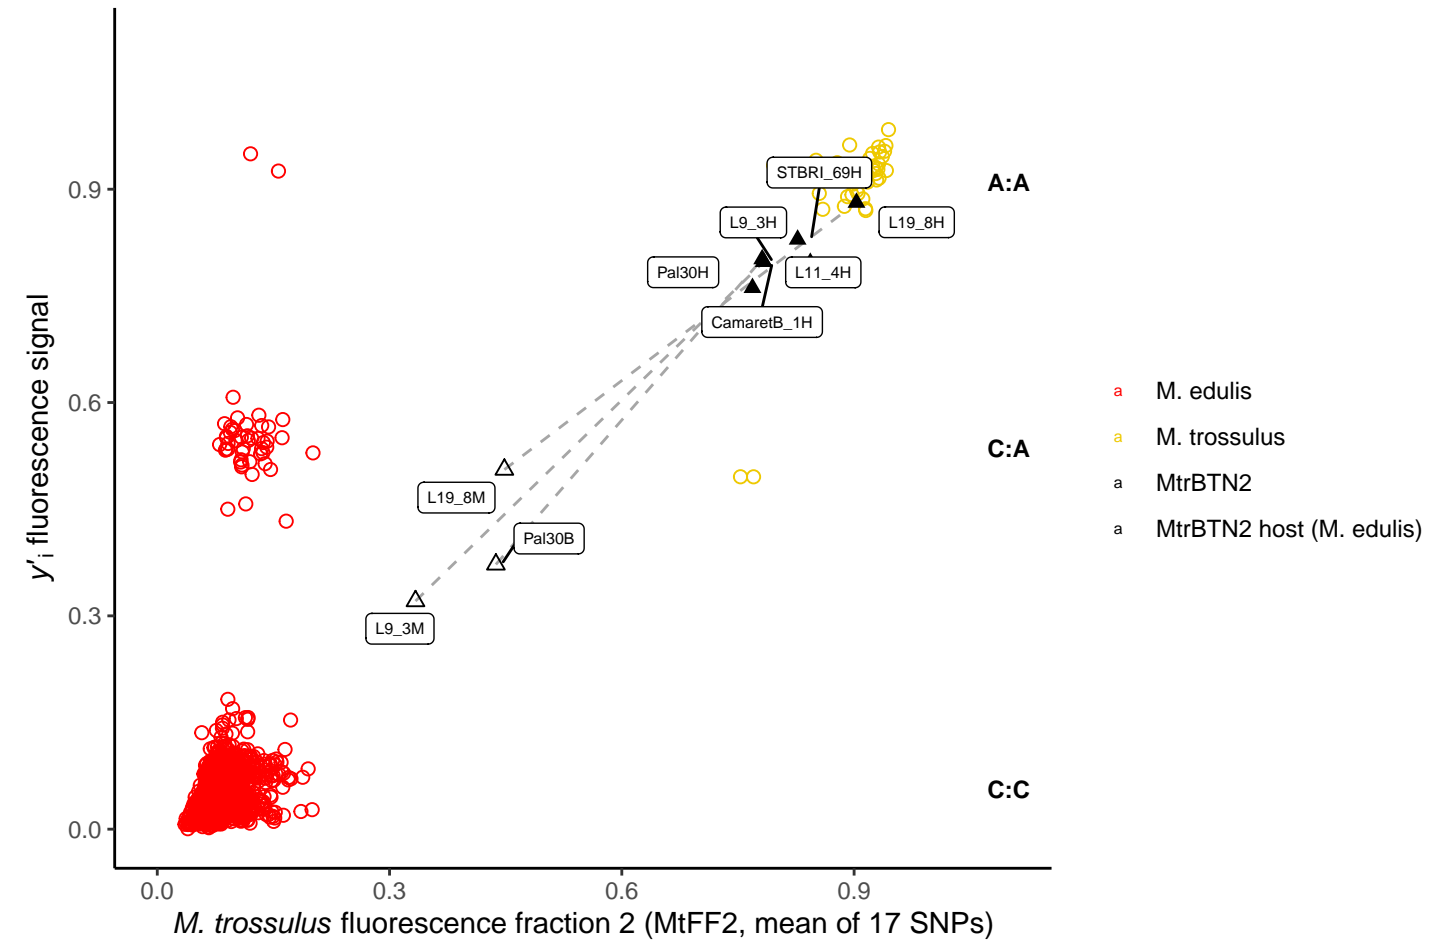



A) KASP fluorescence data plot: 007-C14012\_p60

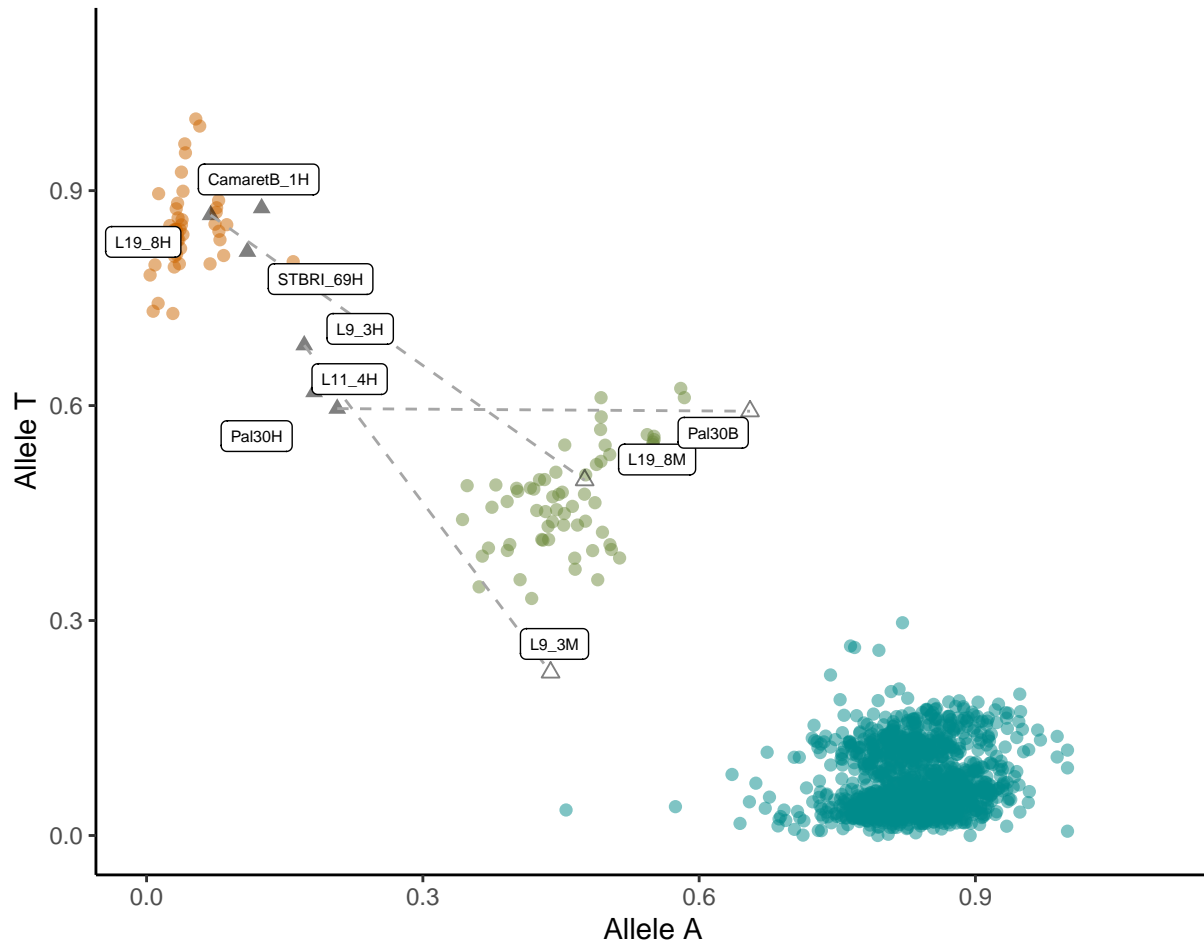

B) Correlation plot: 007-C14012\_p60

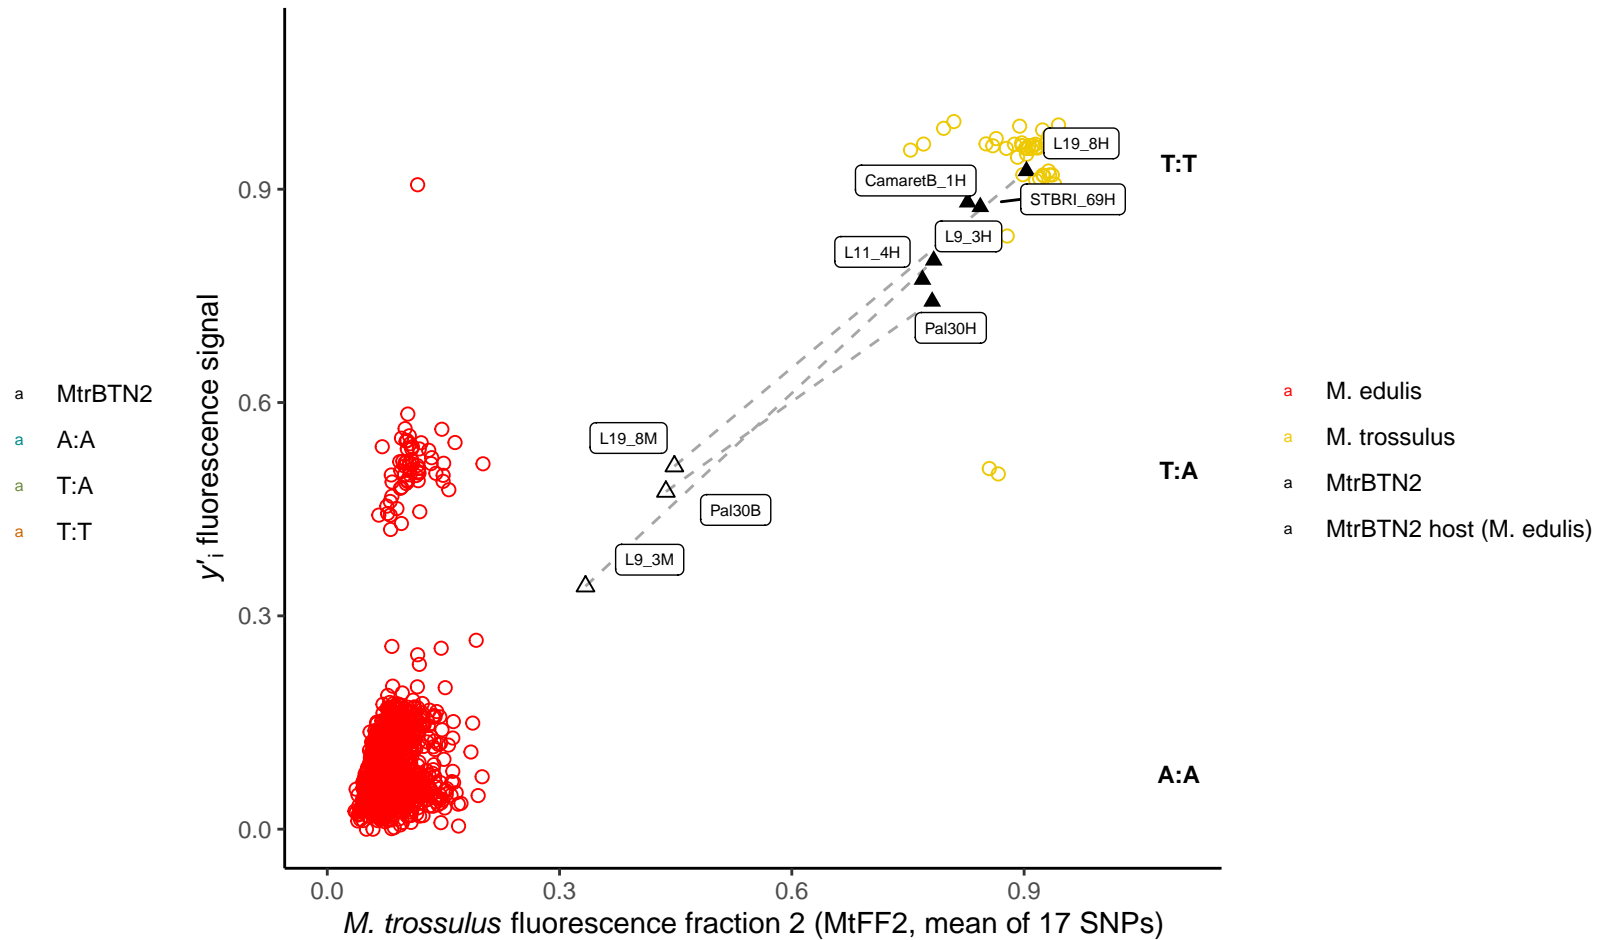

A) KASP fluorescence data plot: 094-gi\_223025780

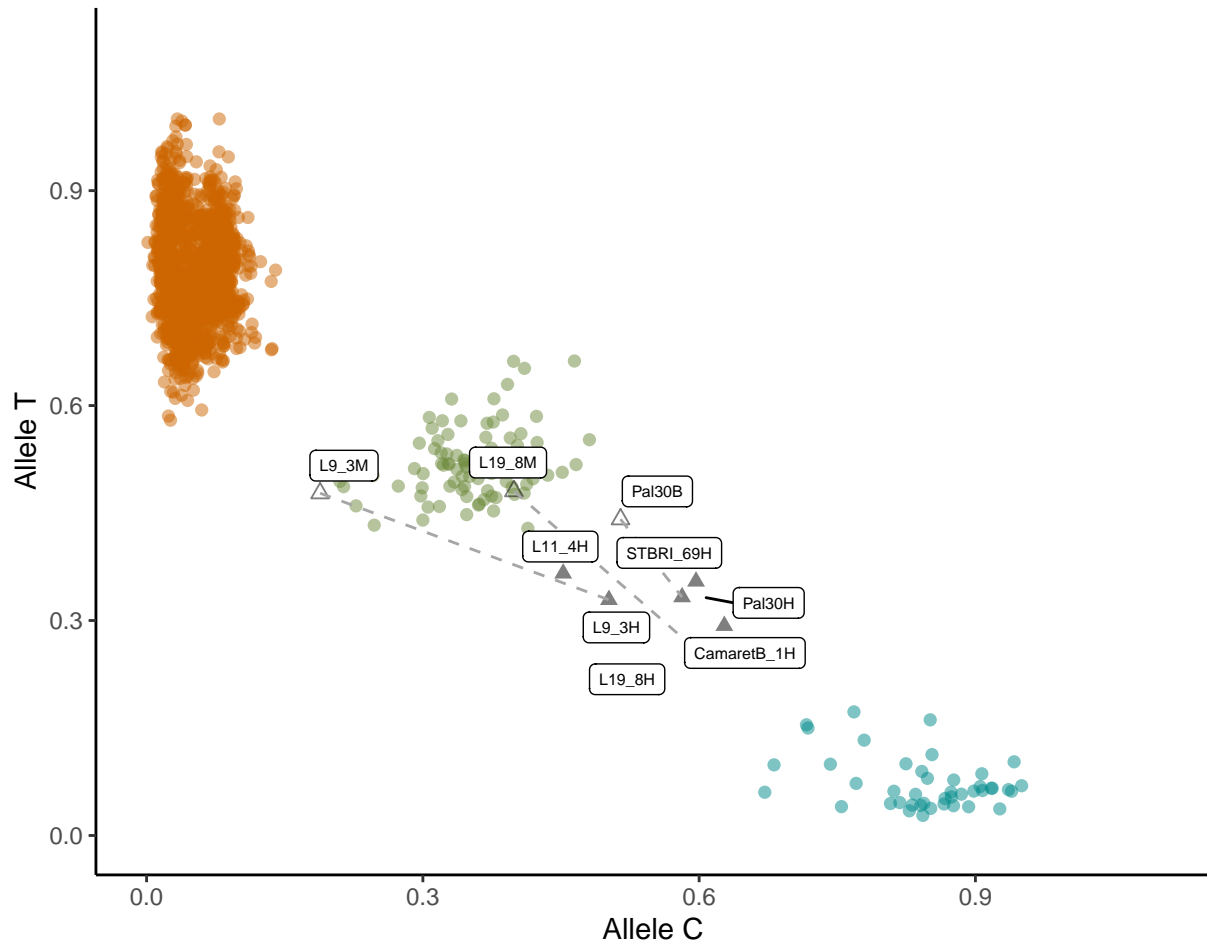

B) Correlation plot: 094-gi\_223025780

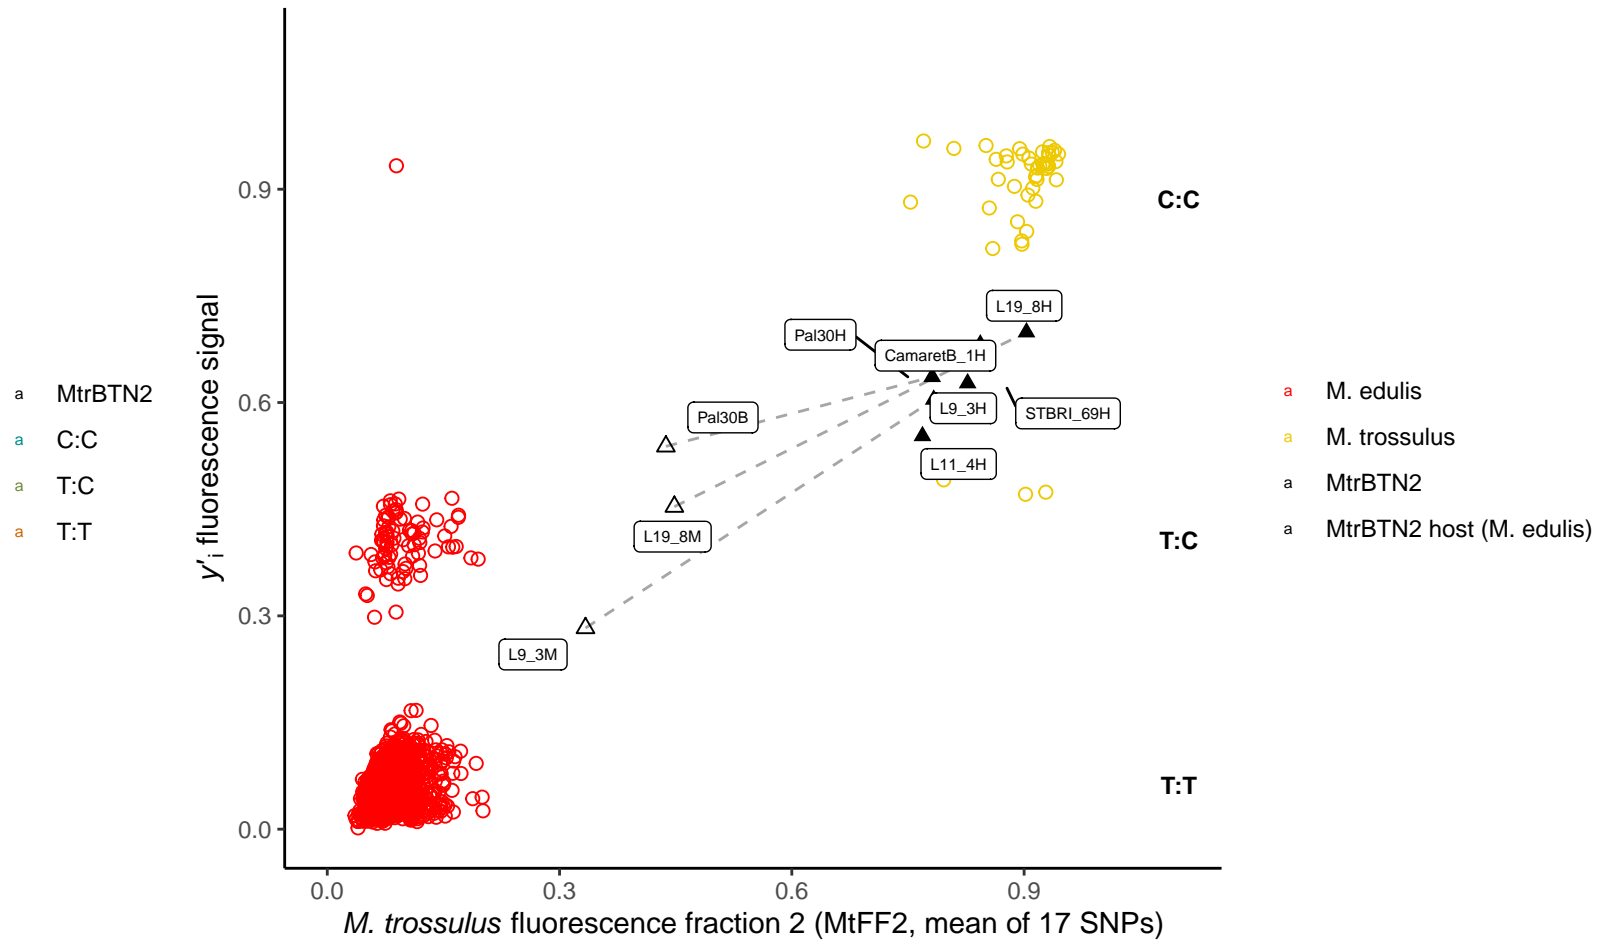

A) KASP fluorescence data plot: 061-C6231\_p1094

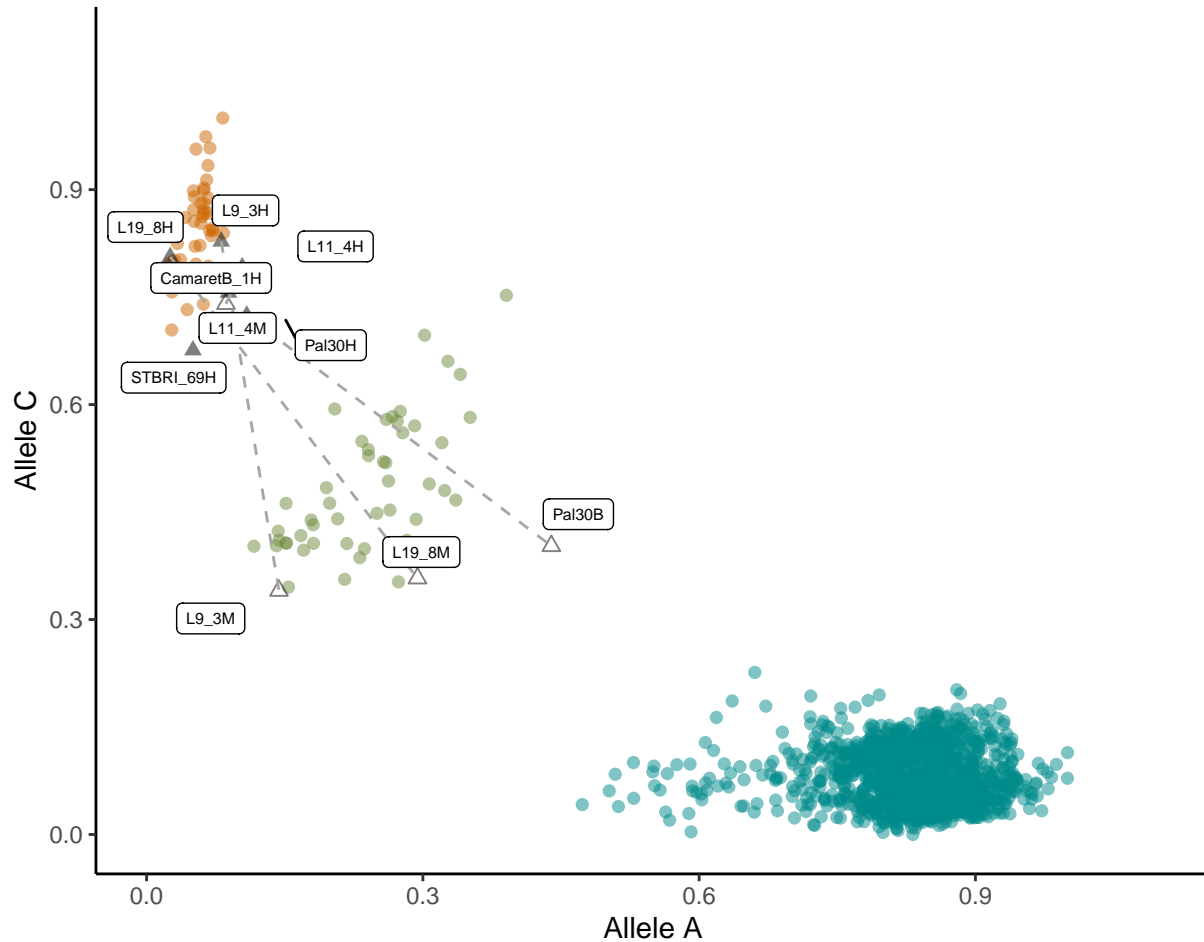

B) Correlation plot: 061-C6231\_p1094

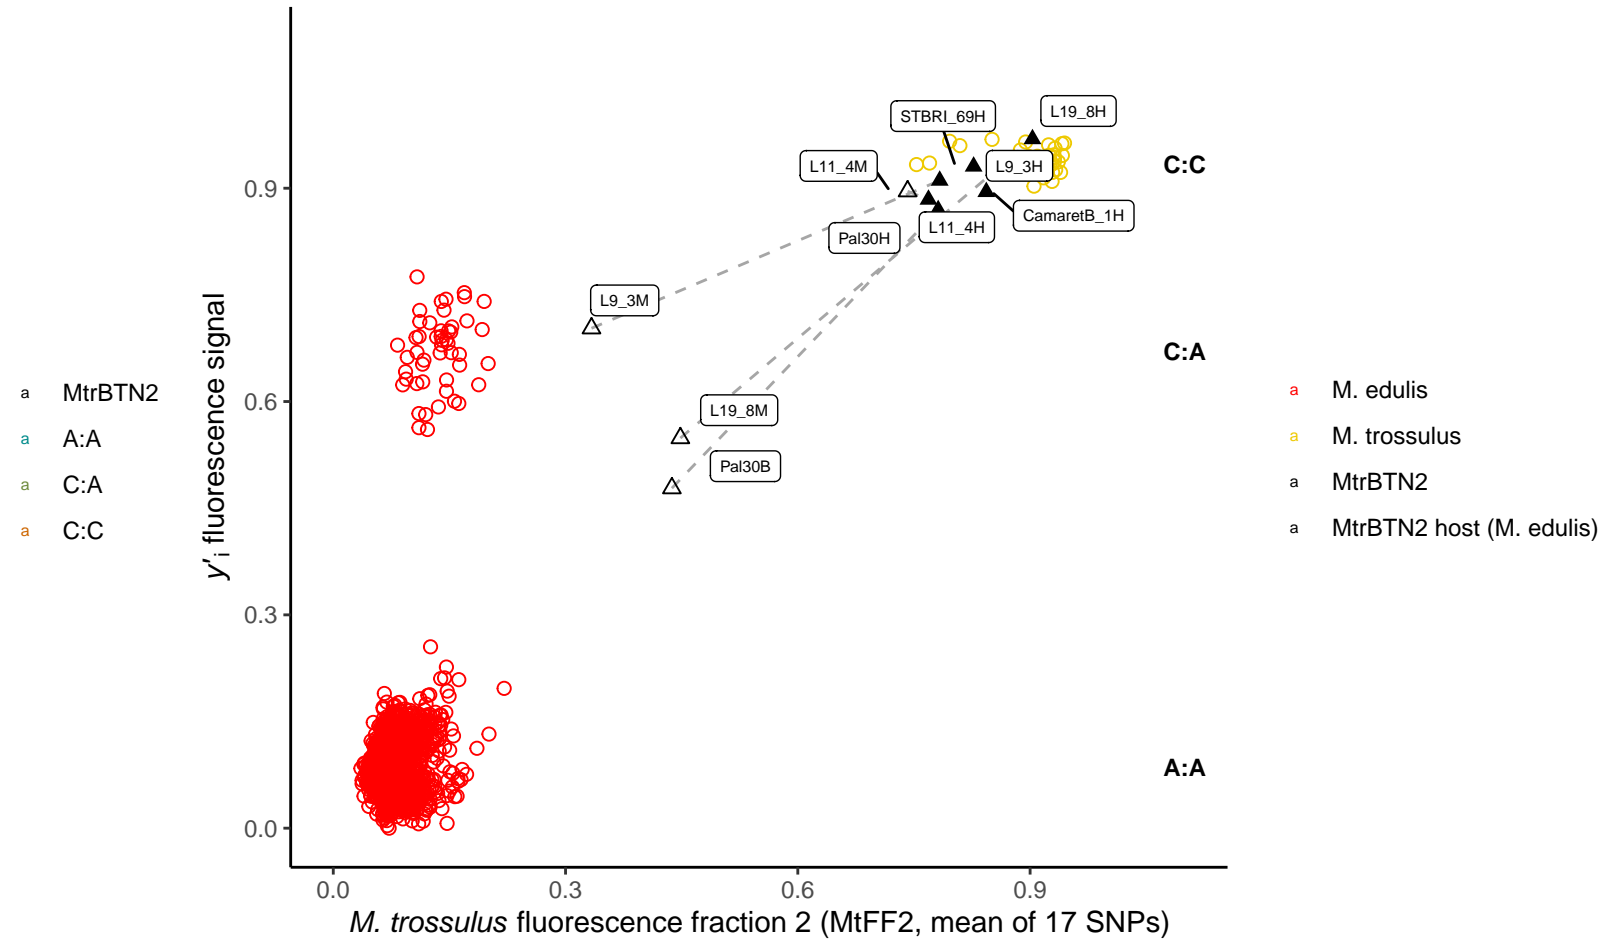

A) KASP fluorescence data plot: 206-R\_L04\_newbler\_C0

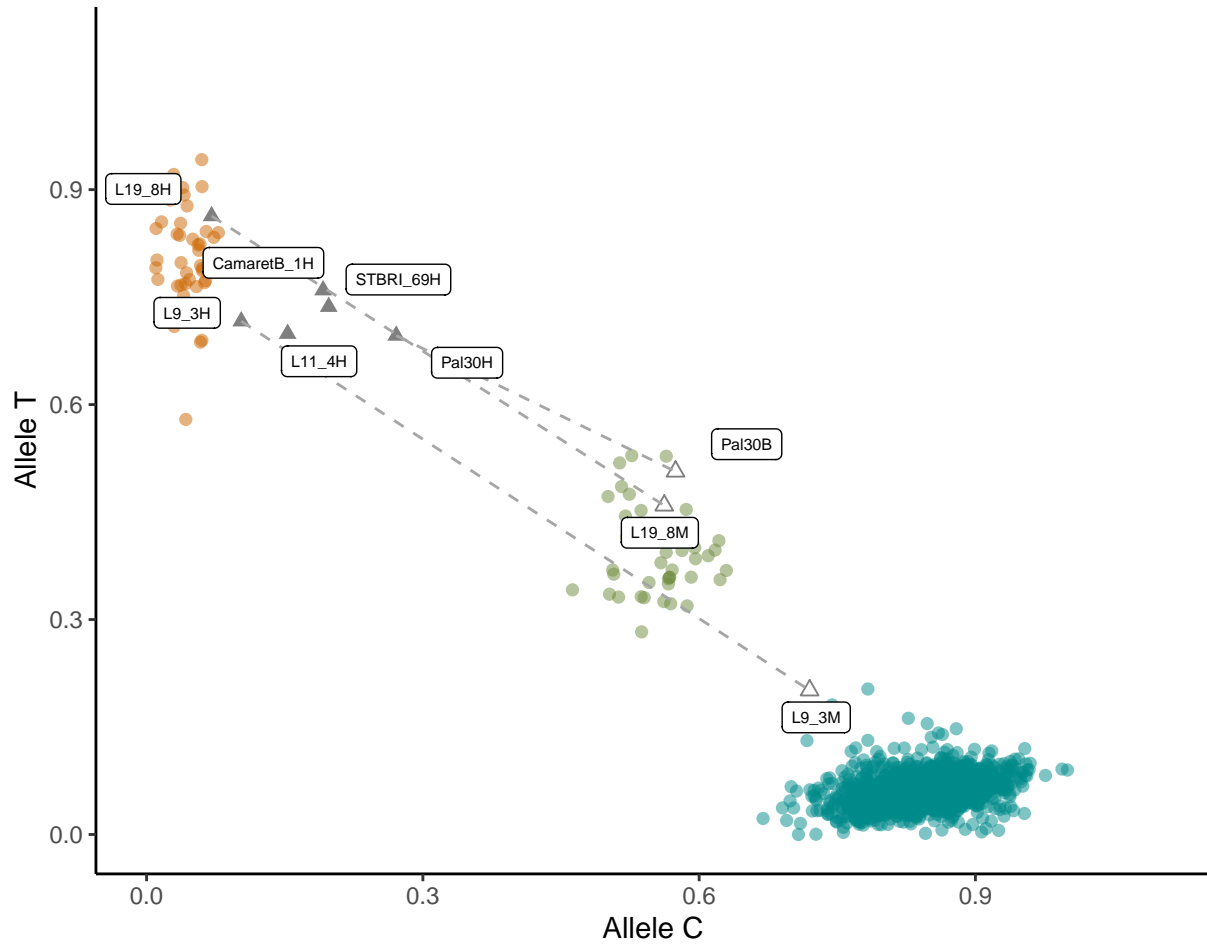

B) Correlation plot: 206-R\_L04\_newbler\_C0

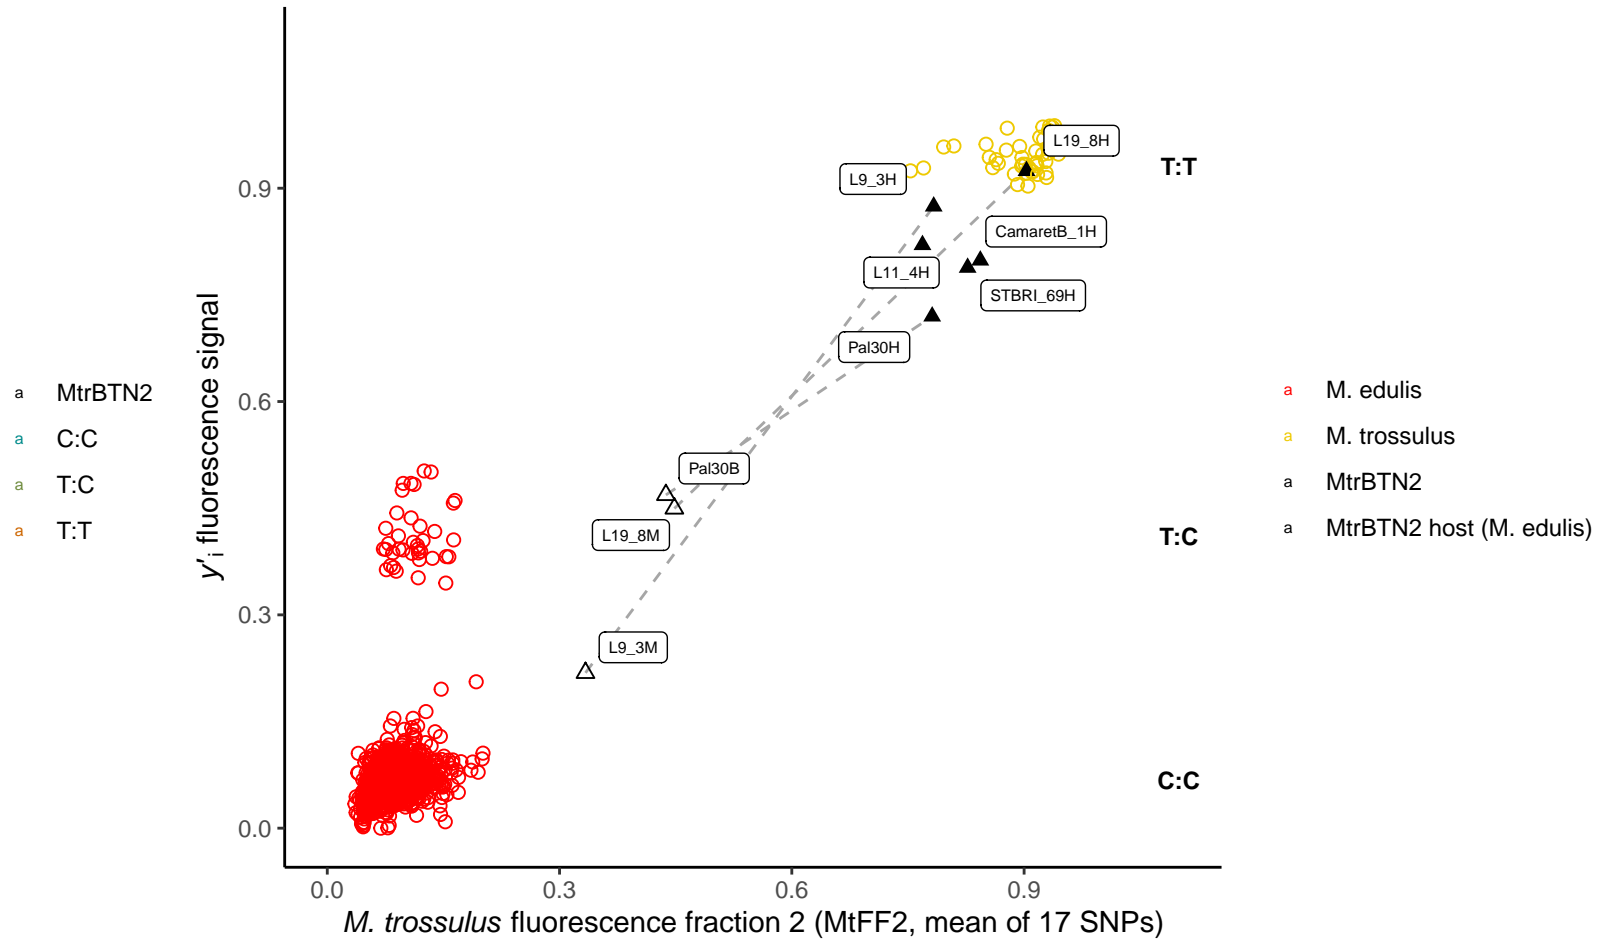

A) KASP fluorescence data plot: 014-Contig16504\_pos702\_Edu\_EU\_US

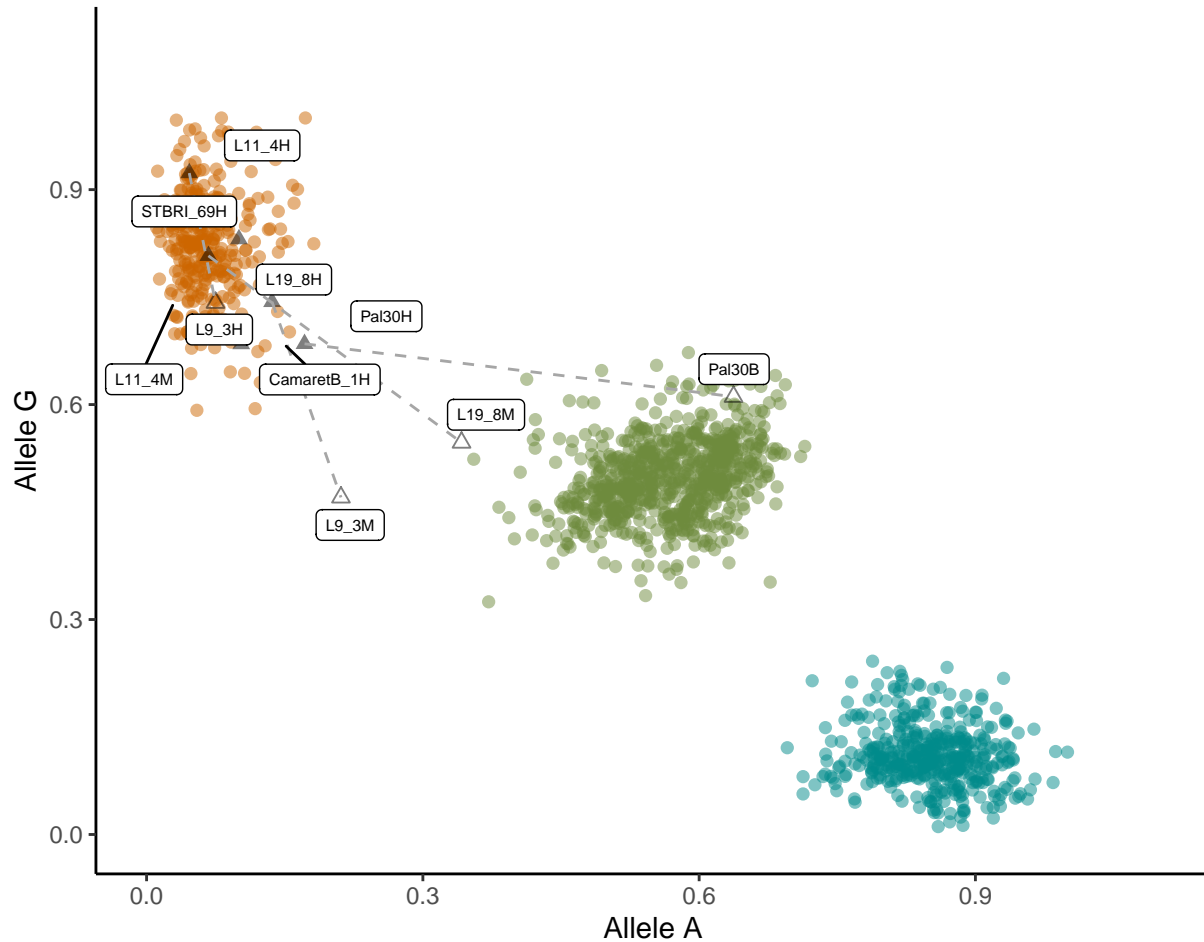

B) Correlation plot: 014-Contig16504\_pos702\_Edu\_EU\_US

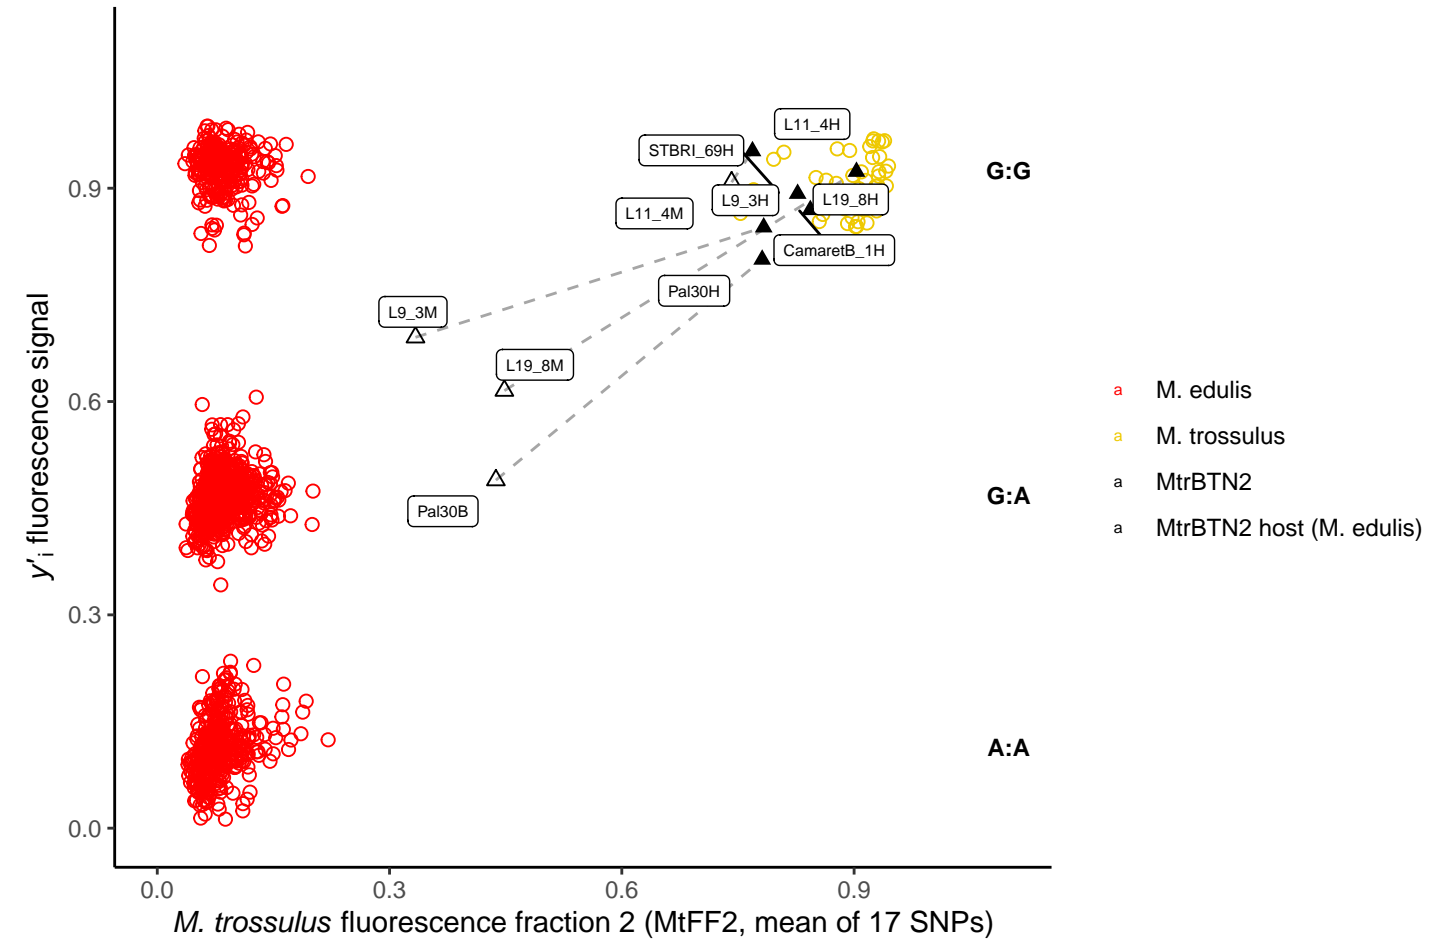

A) KASP fluorescence data plot: 607-loc049\_id1314\_p3

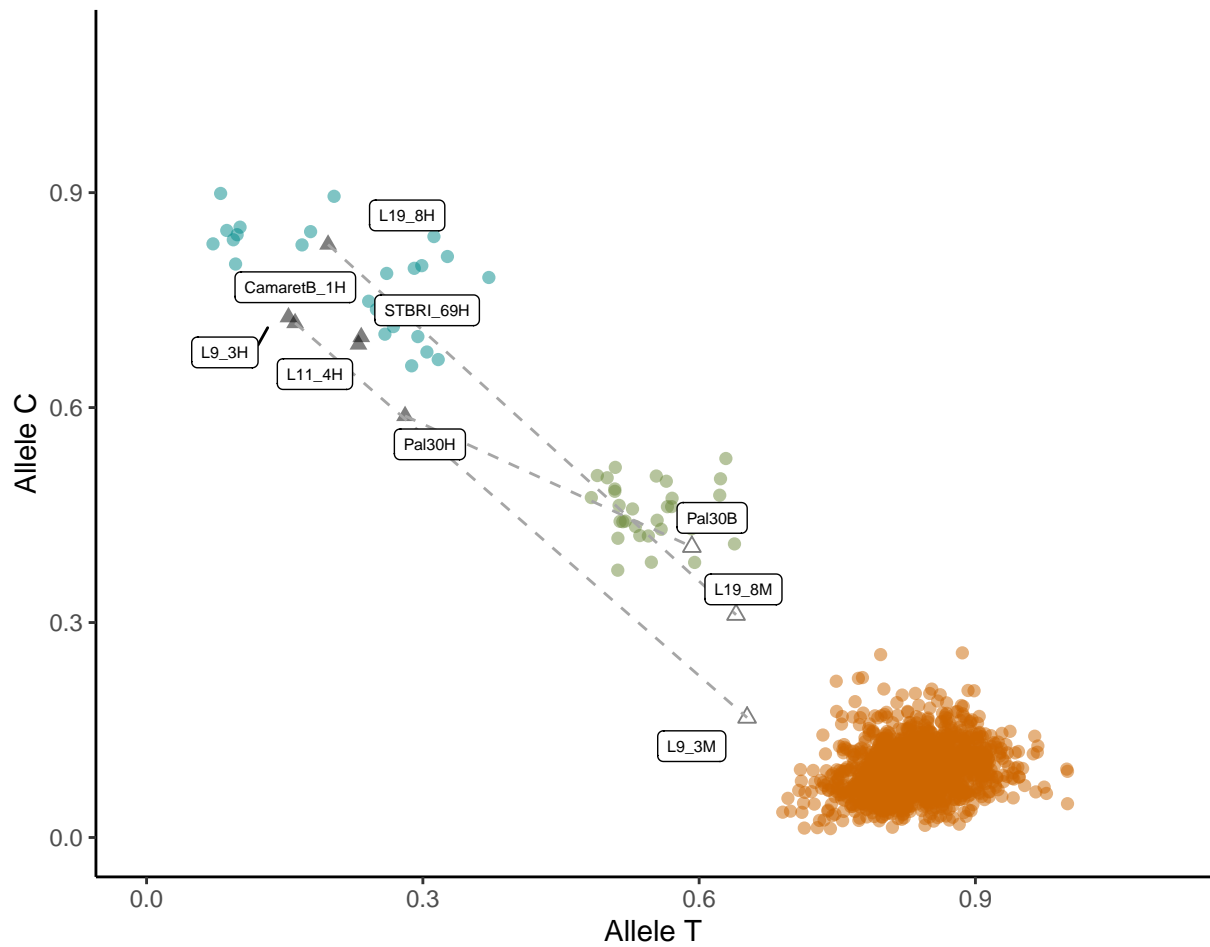

B) Correlation plot: 607-loc049\_id1314\_p3

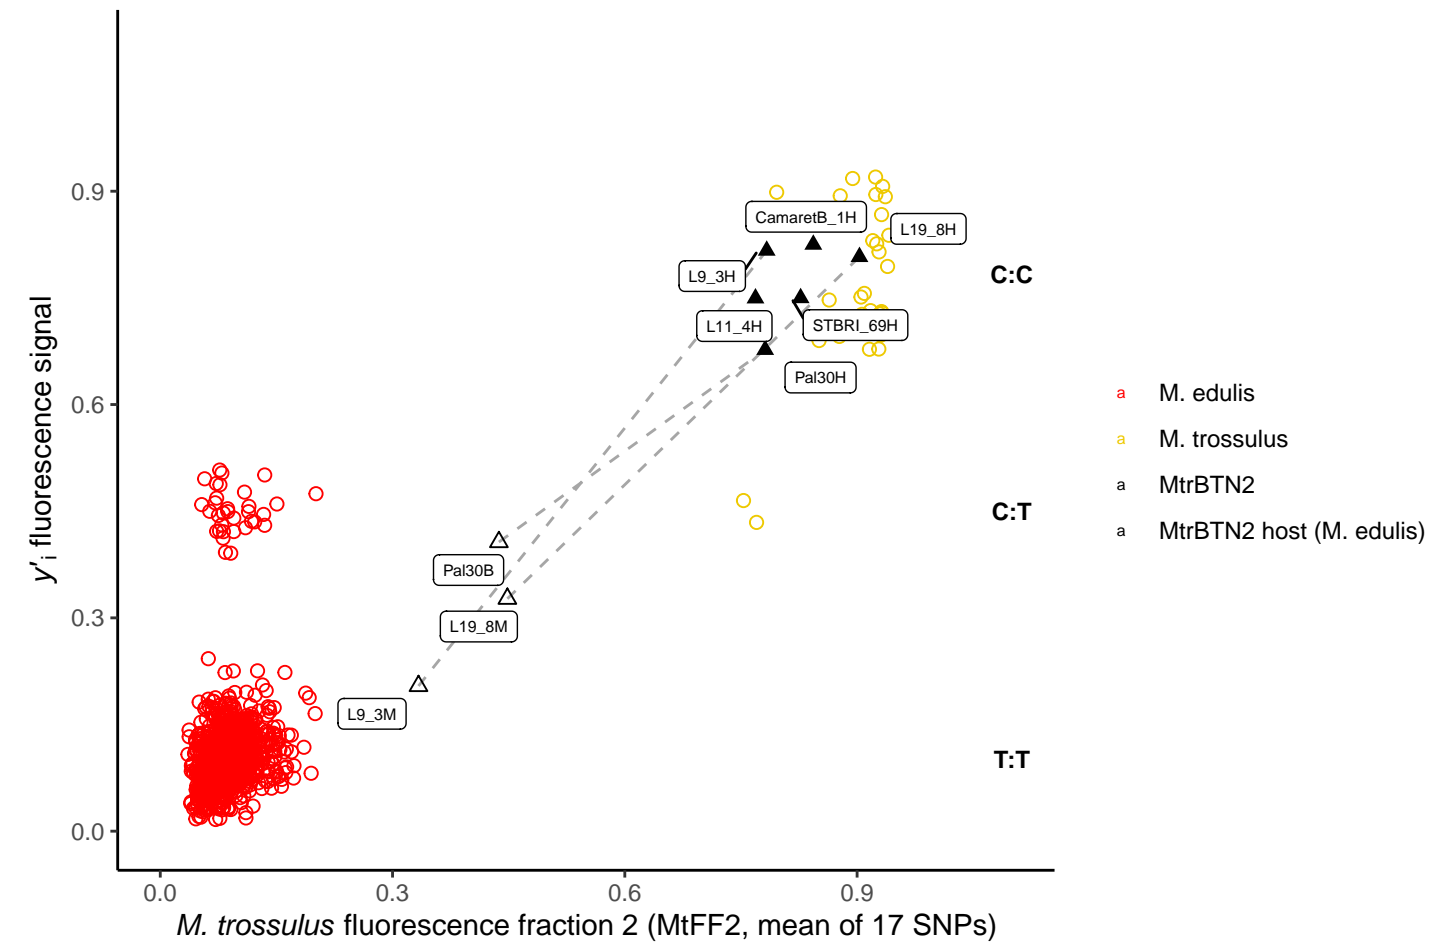

A) KASP fluorescence data plot: 073-C8592\_p1593

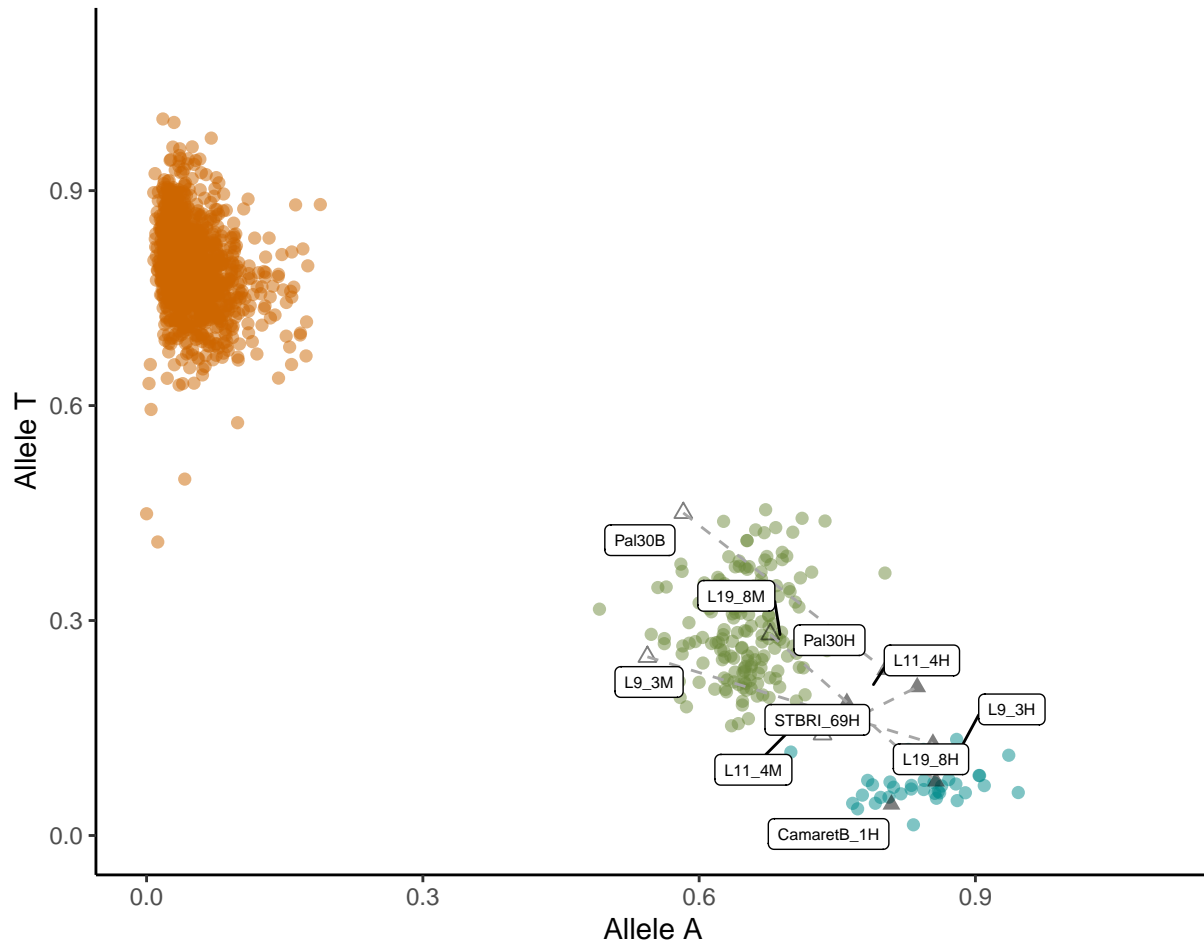

B) Correlation plot: 073-C8592\_p1593

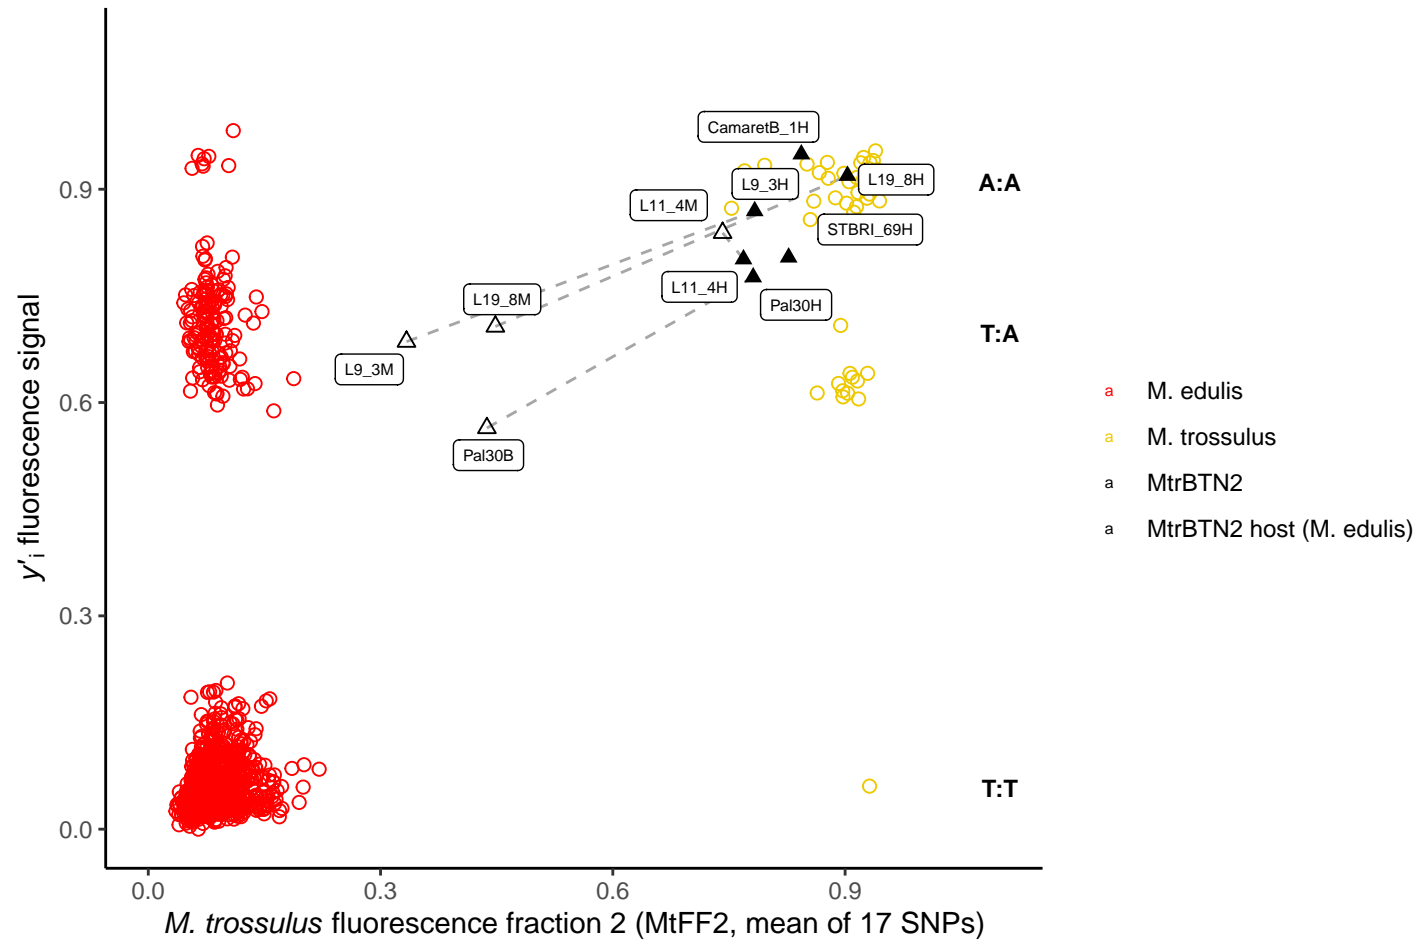

A) KASP fluorescence data plot: 164-abys\_C906\_p3592

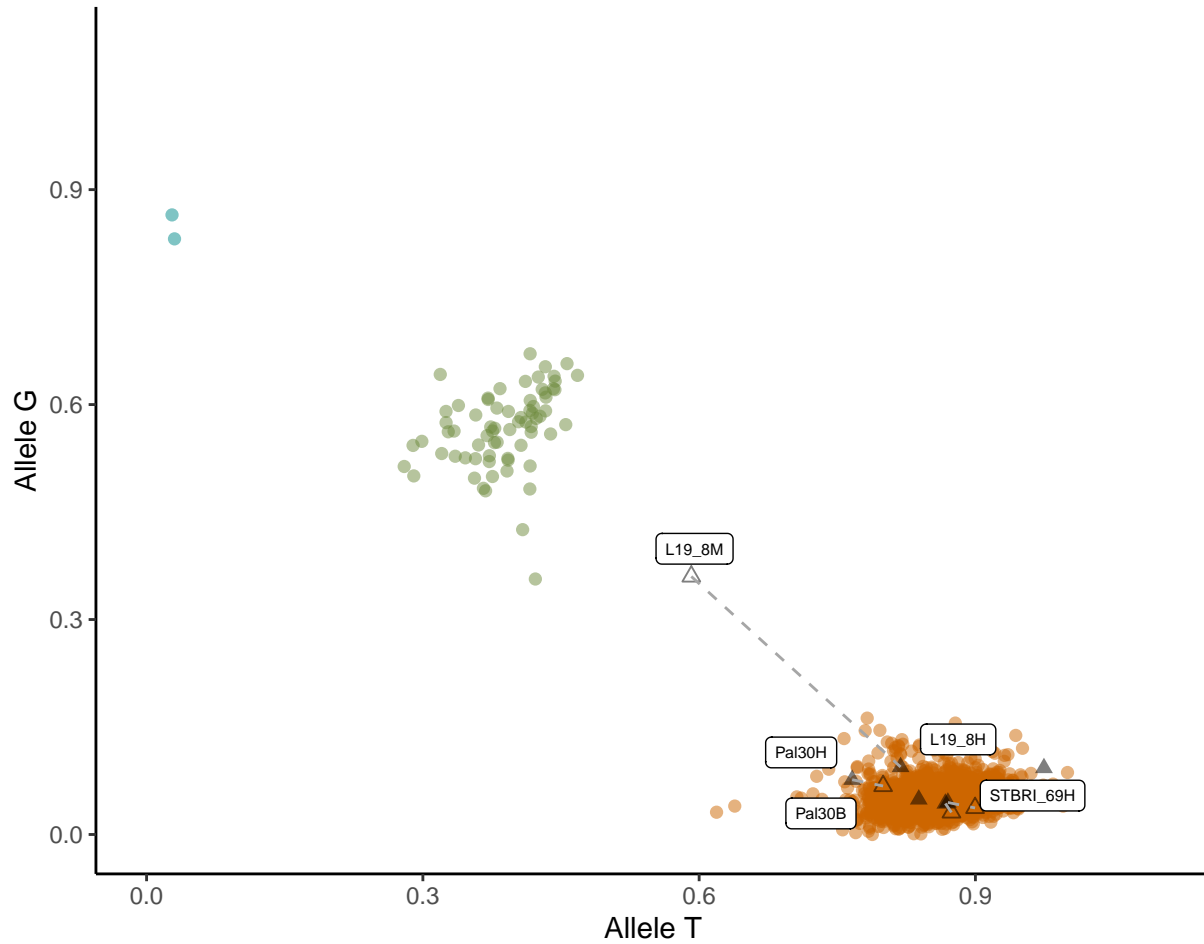

B) Correlation plot: 164-abys\_C906\_p3592

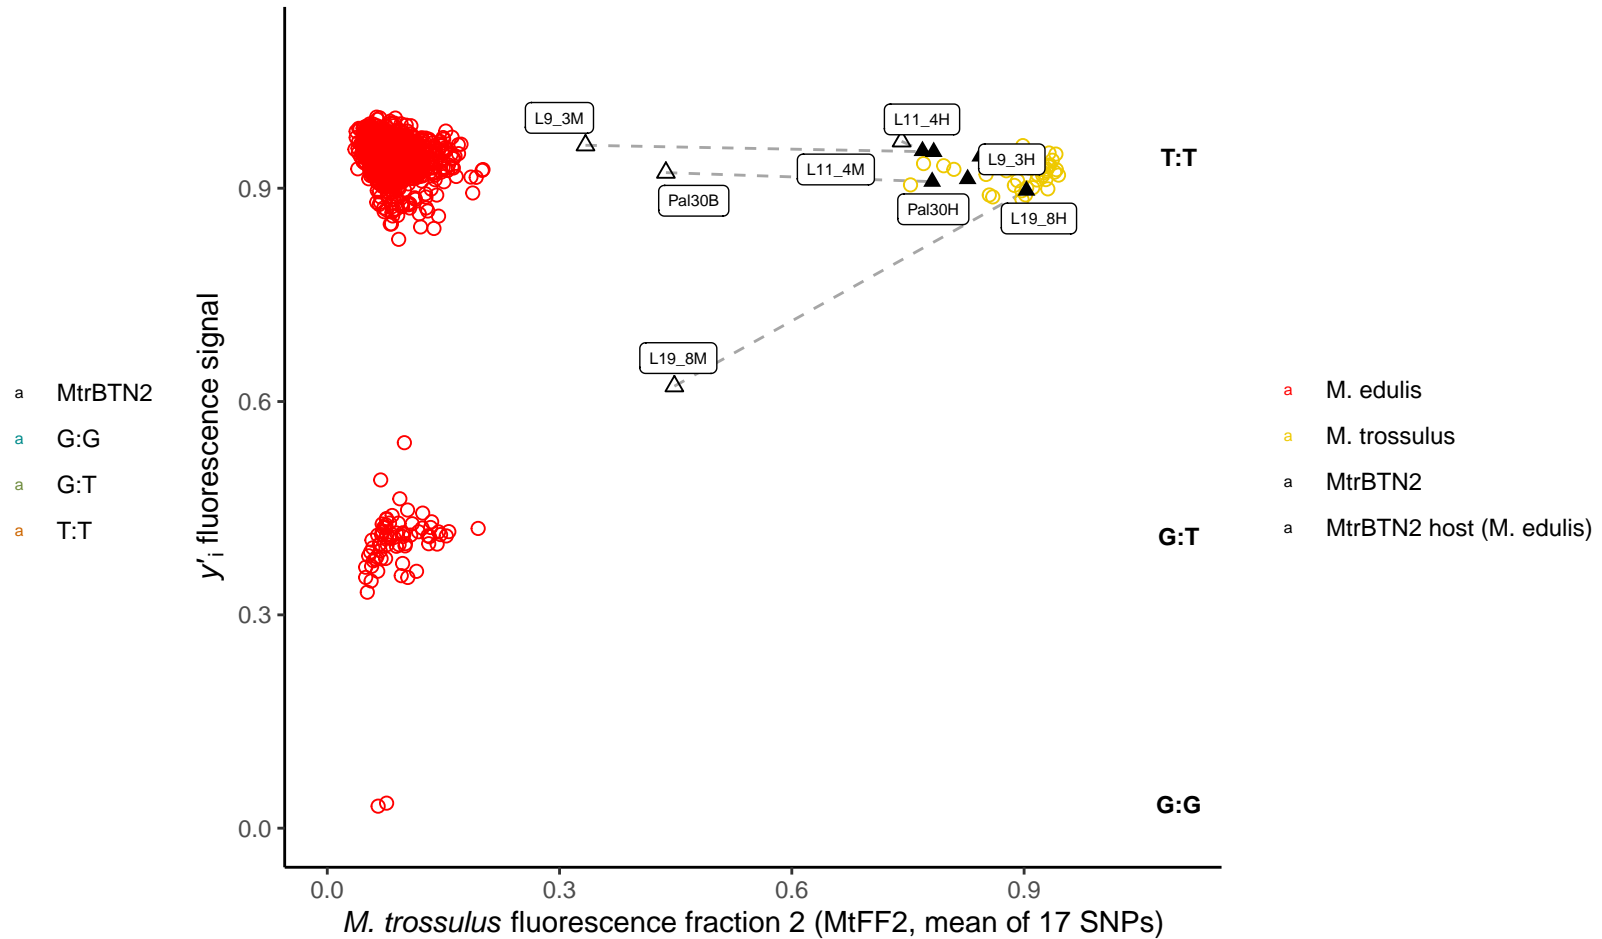



A) KASP fluorescence data plot: 001-C10081\_p1314

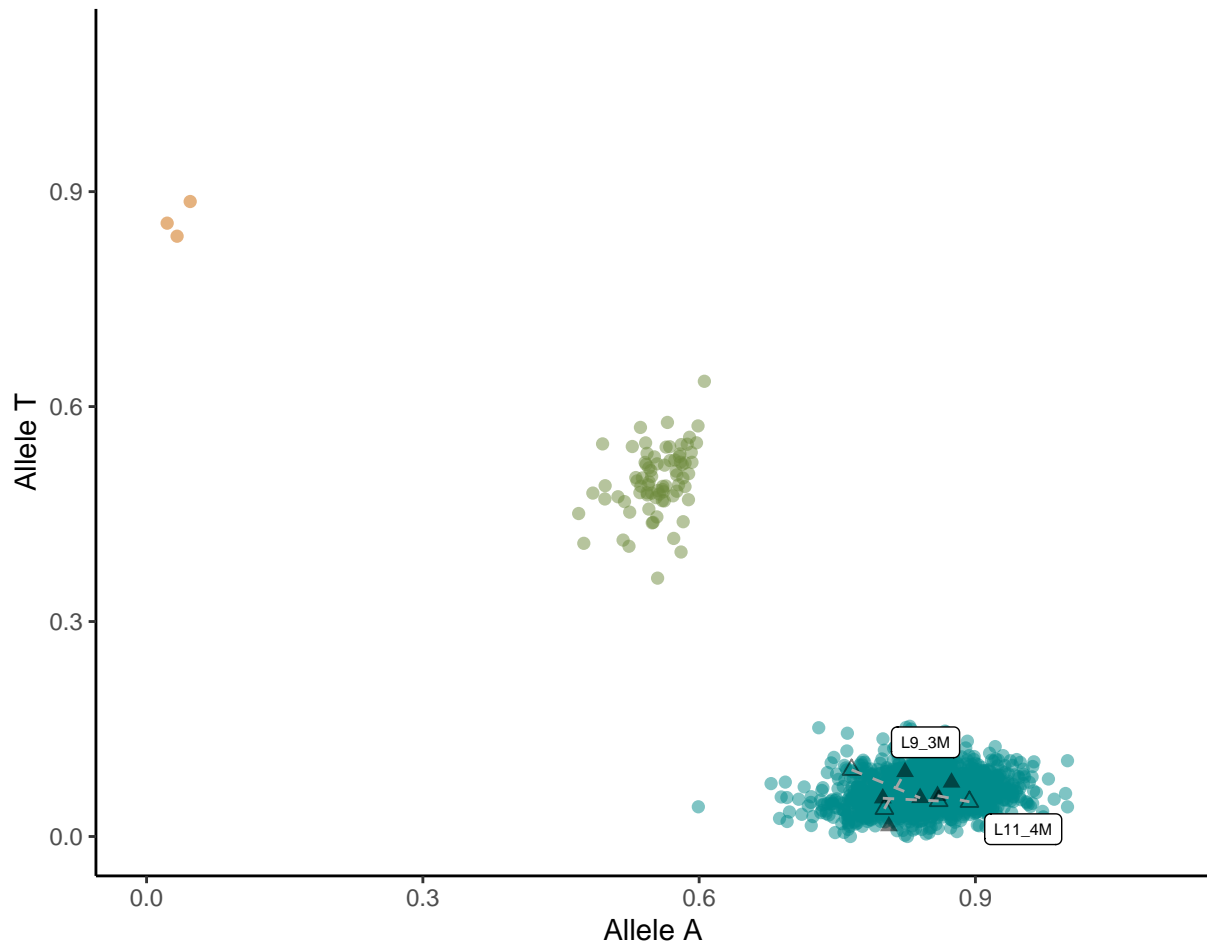

B) Correlation plot: 001-C10081\_p1314

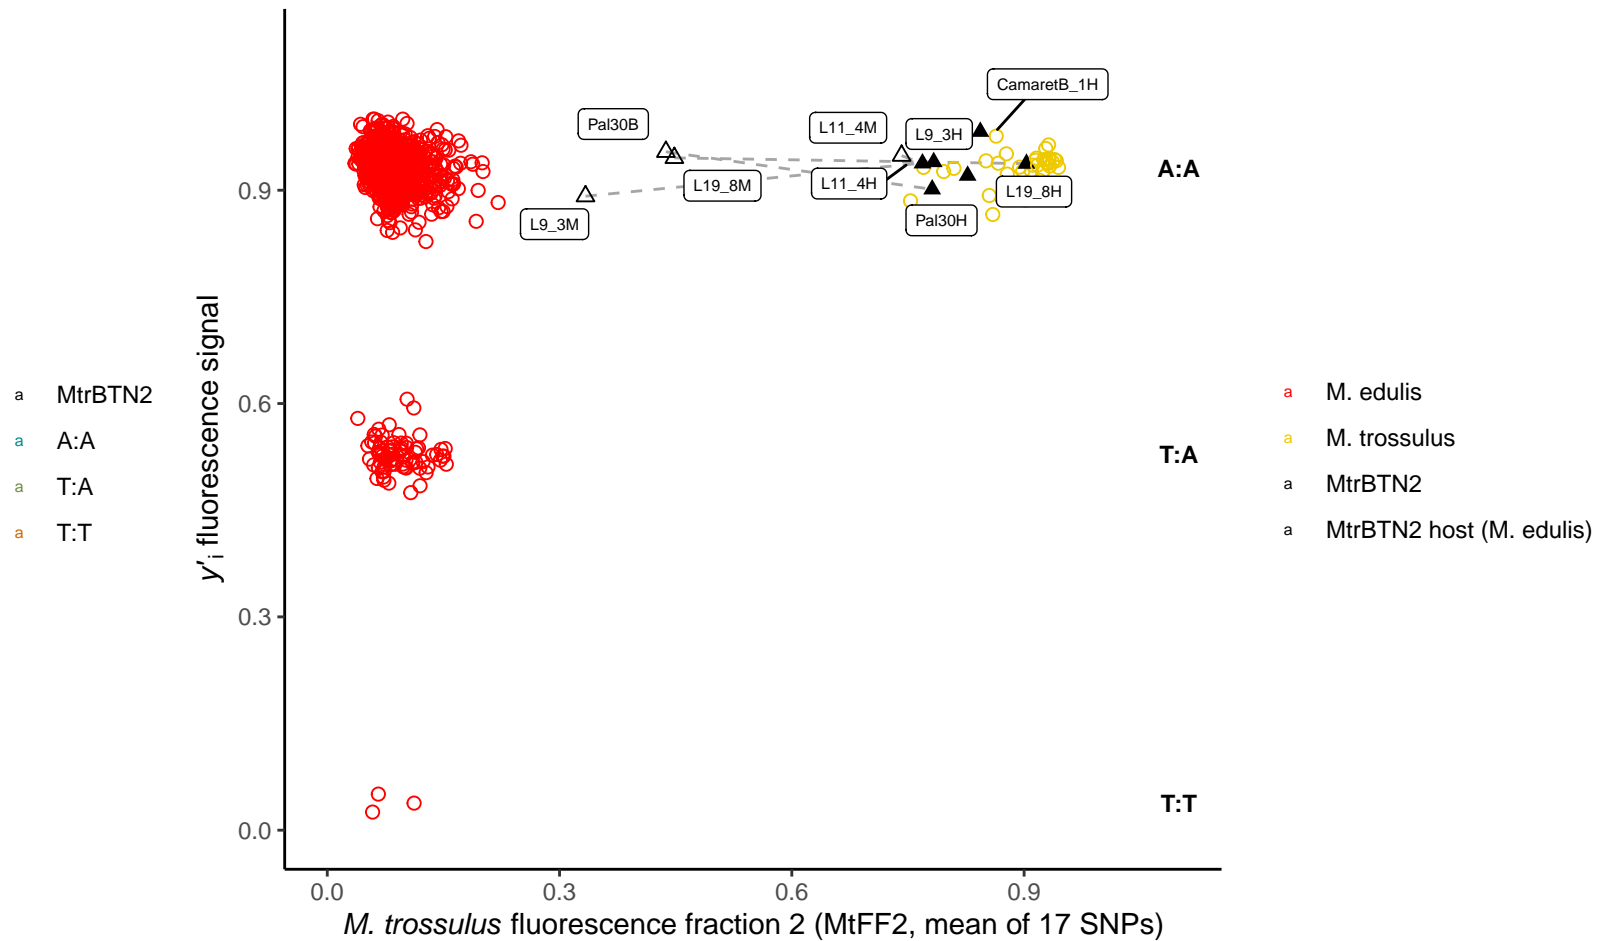

A) KASP fluorescence data plot: 076-C9105\_p949

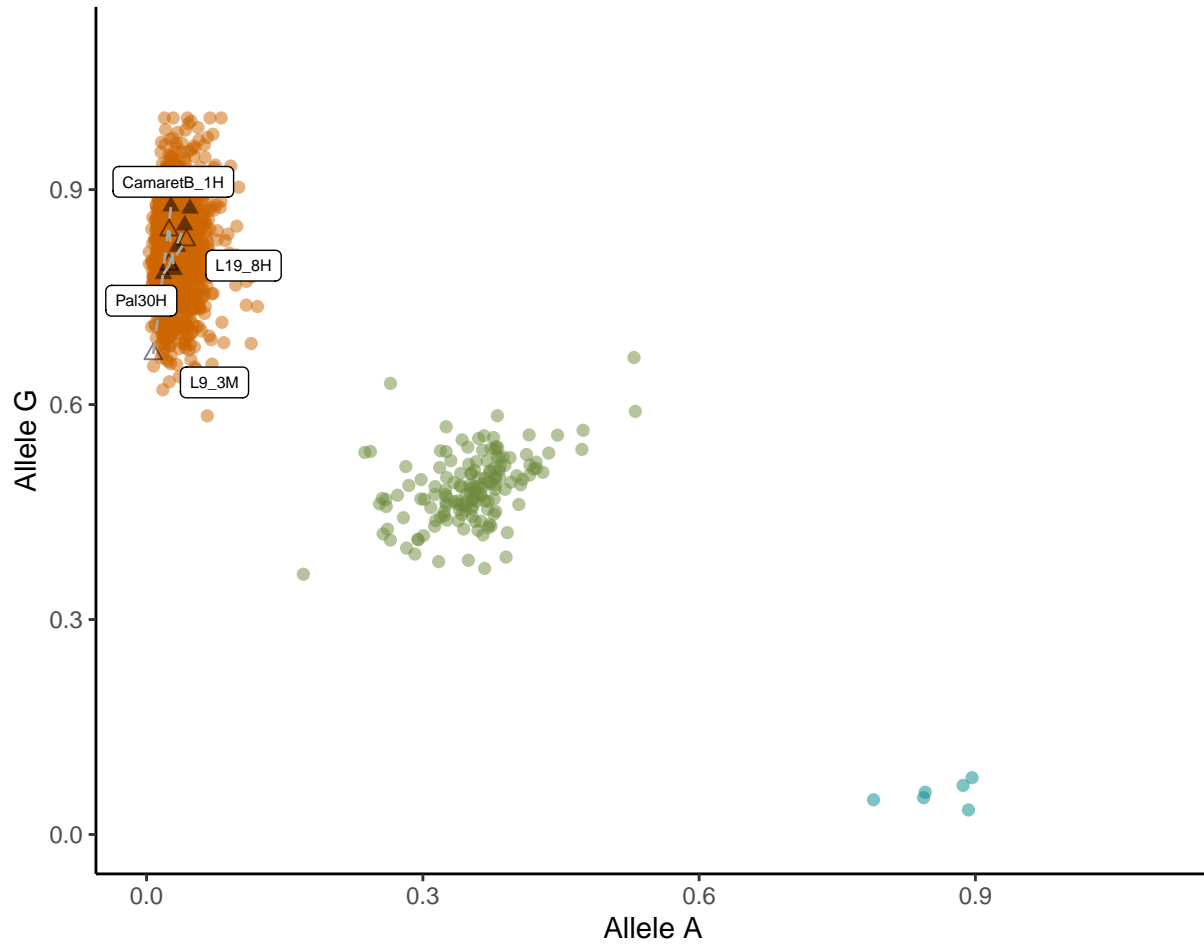

B) Correlation plot: 076-C9105\_p949

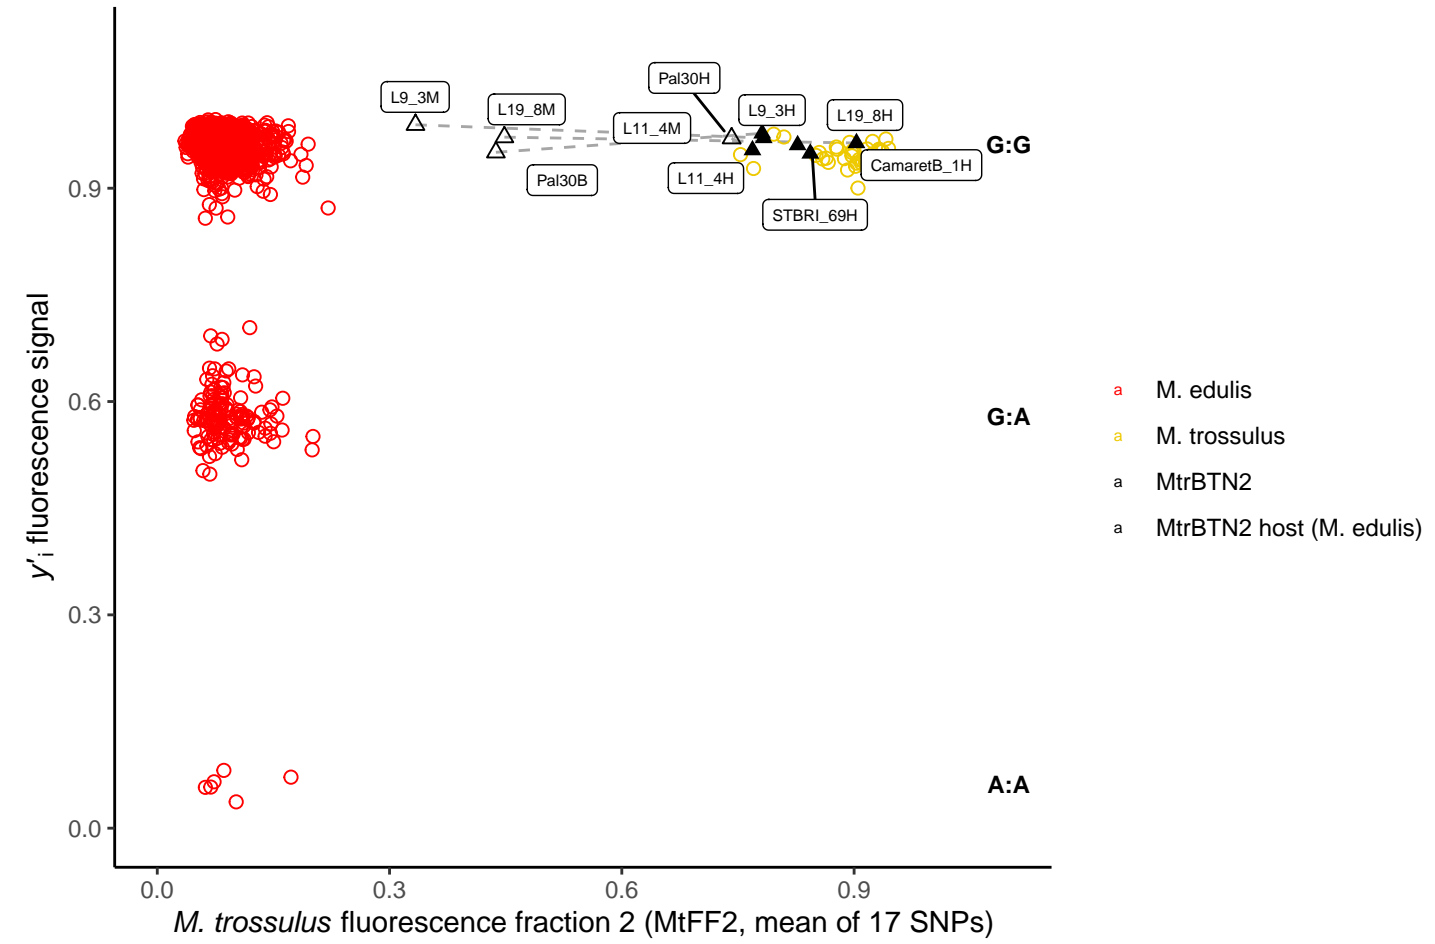

A) KASP fluorescence data plot: 202-L02\_mira\_C1\_p242

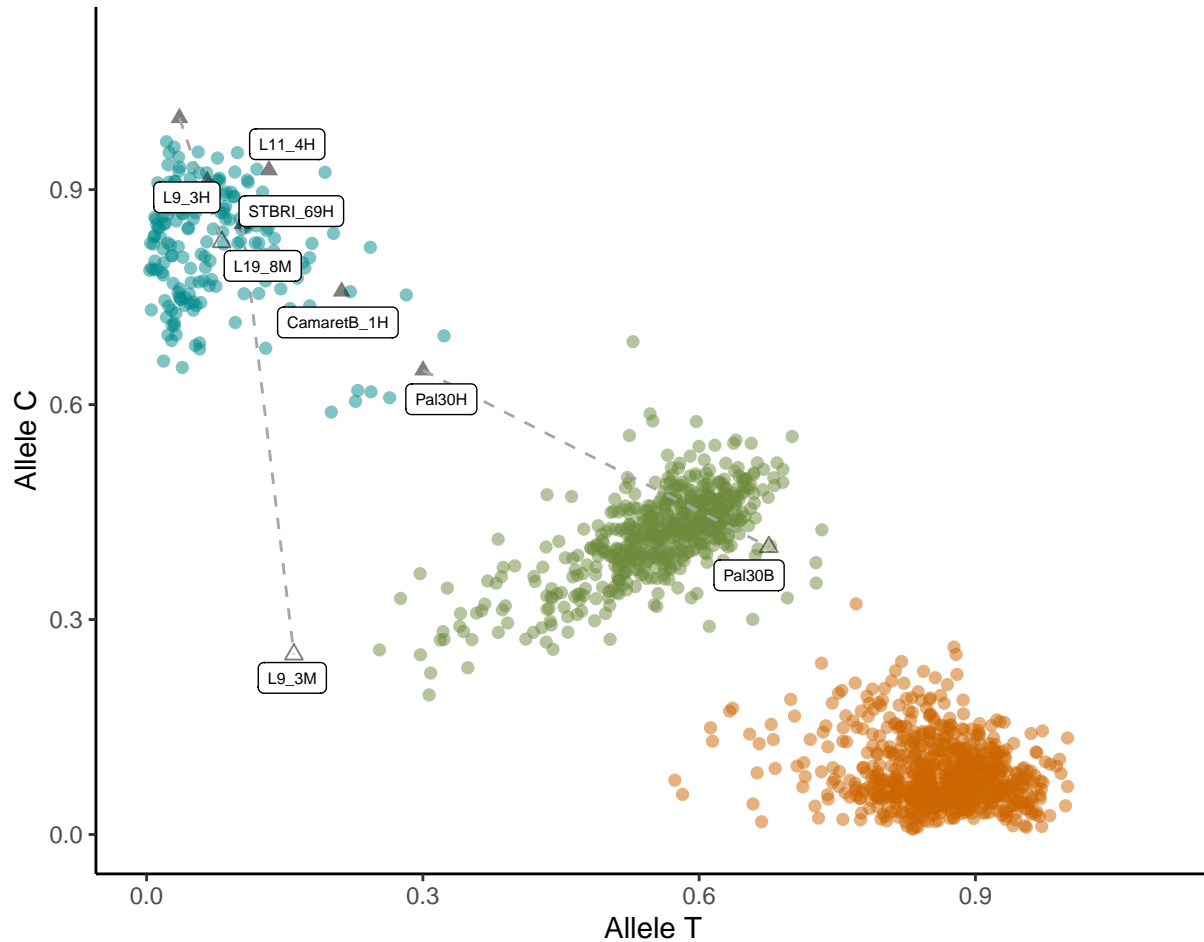

B) Correlation plot: 202-L02\_mira\_C1\_p242

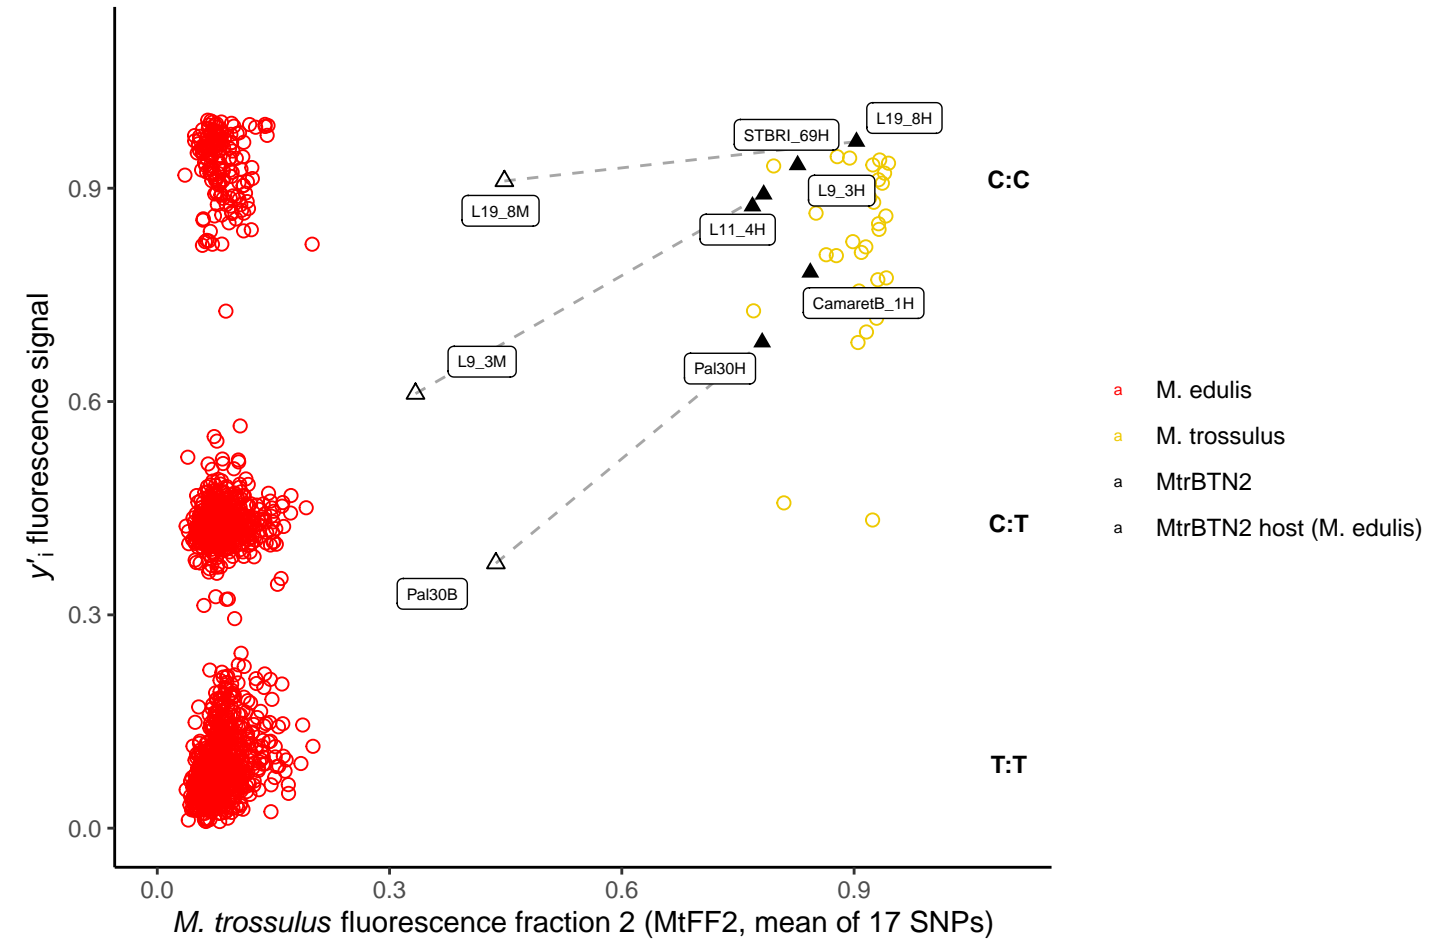

A) KASP fluorescence data plot: 062-C63342\_p1271

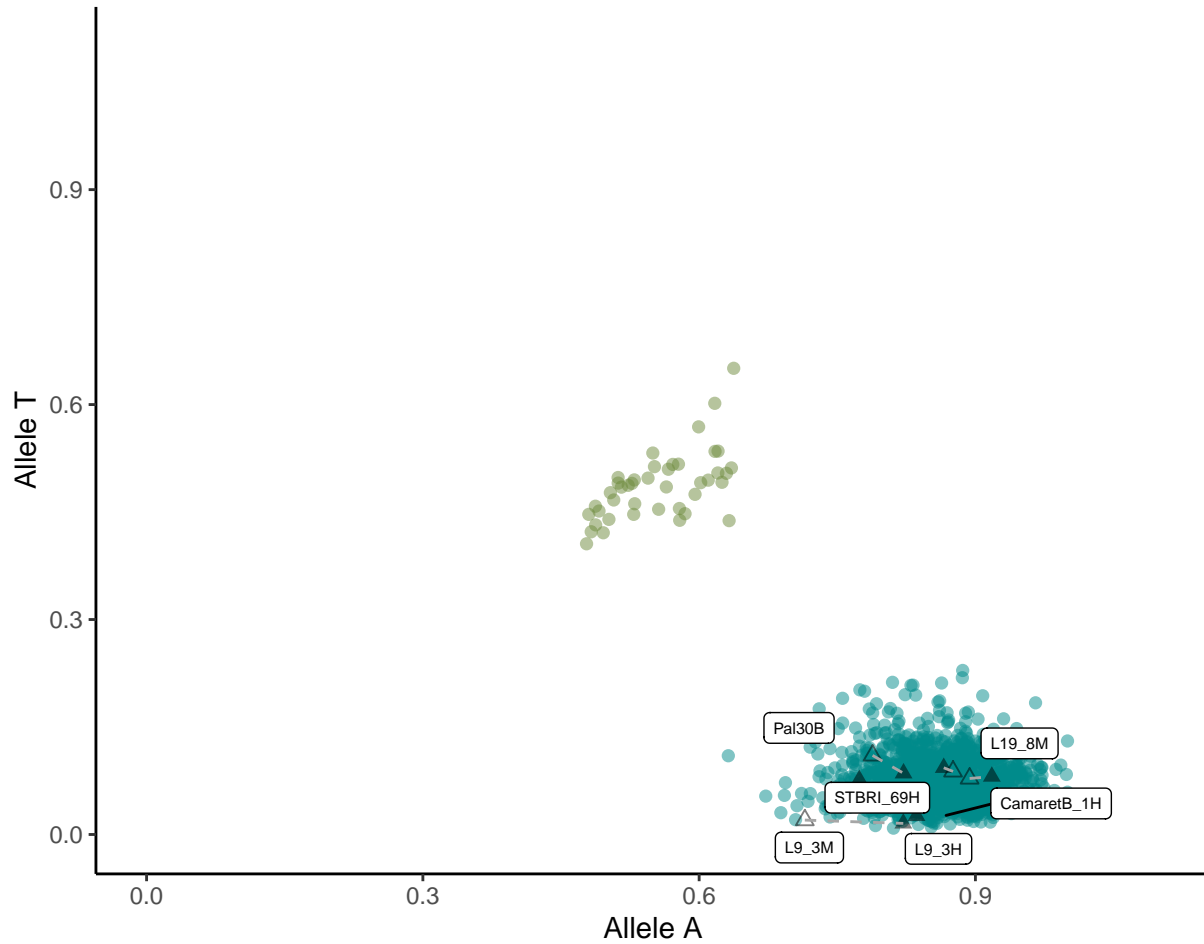

B) Correlation plot: 062-C63342\_p1271

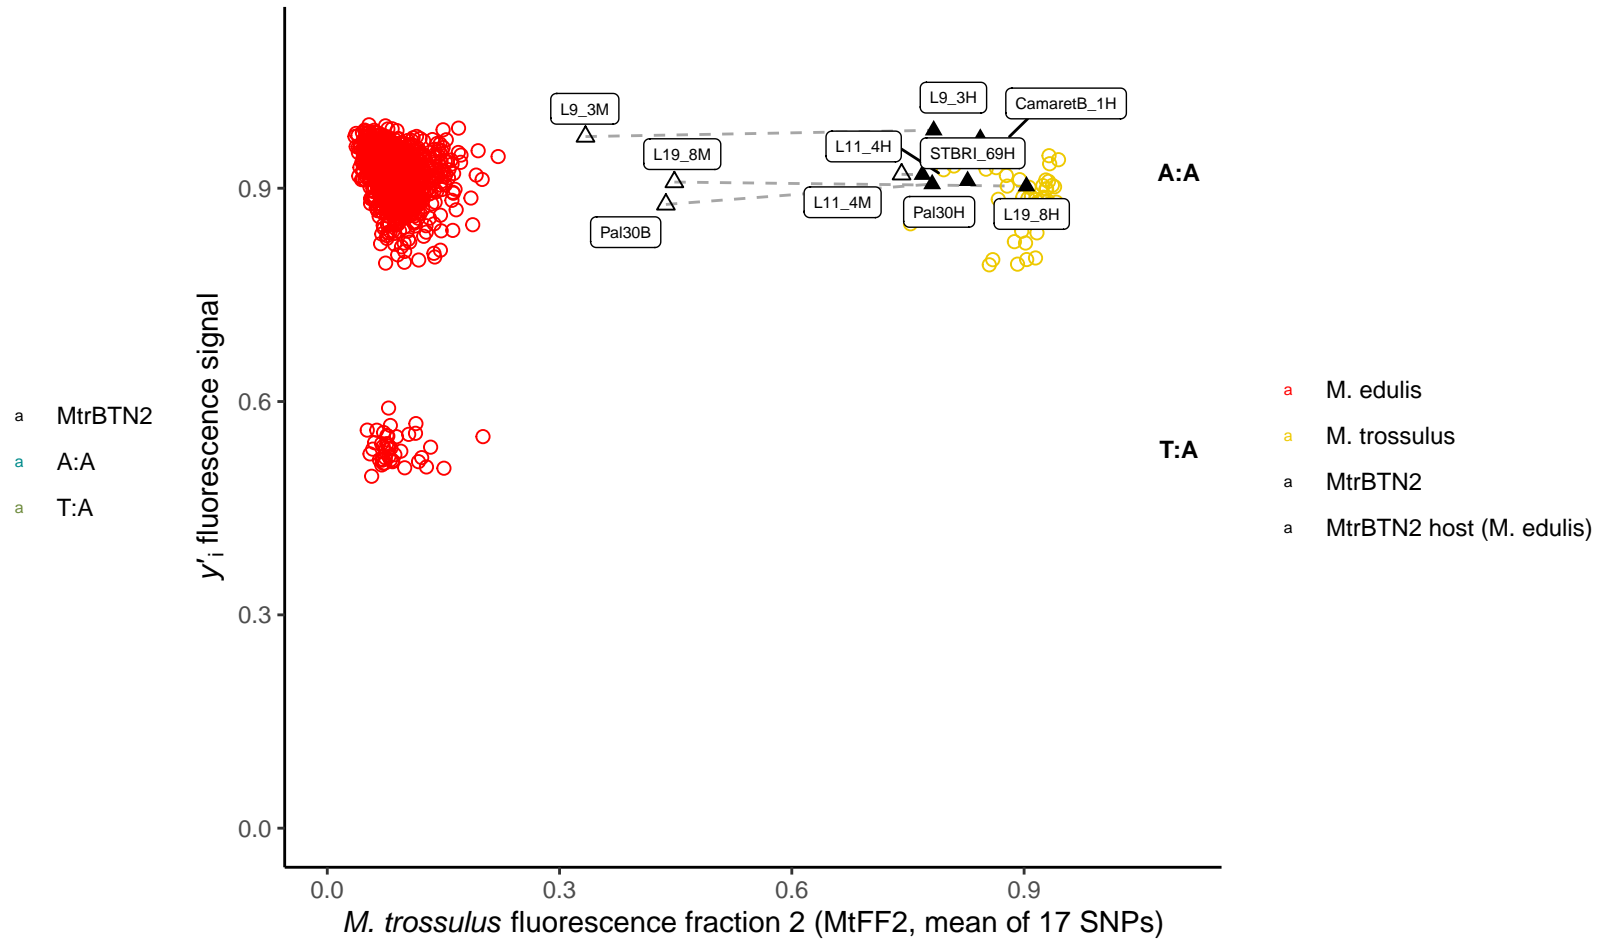

A) KASP fluorescence data plot: 115-gi\_384113217

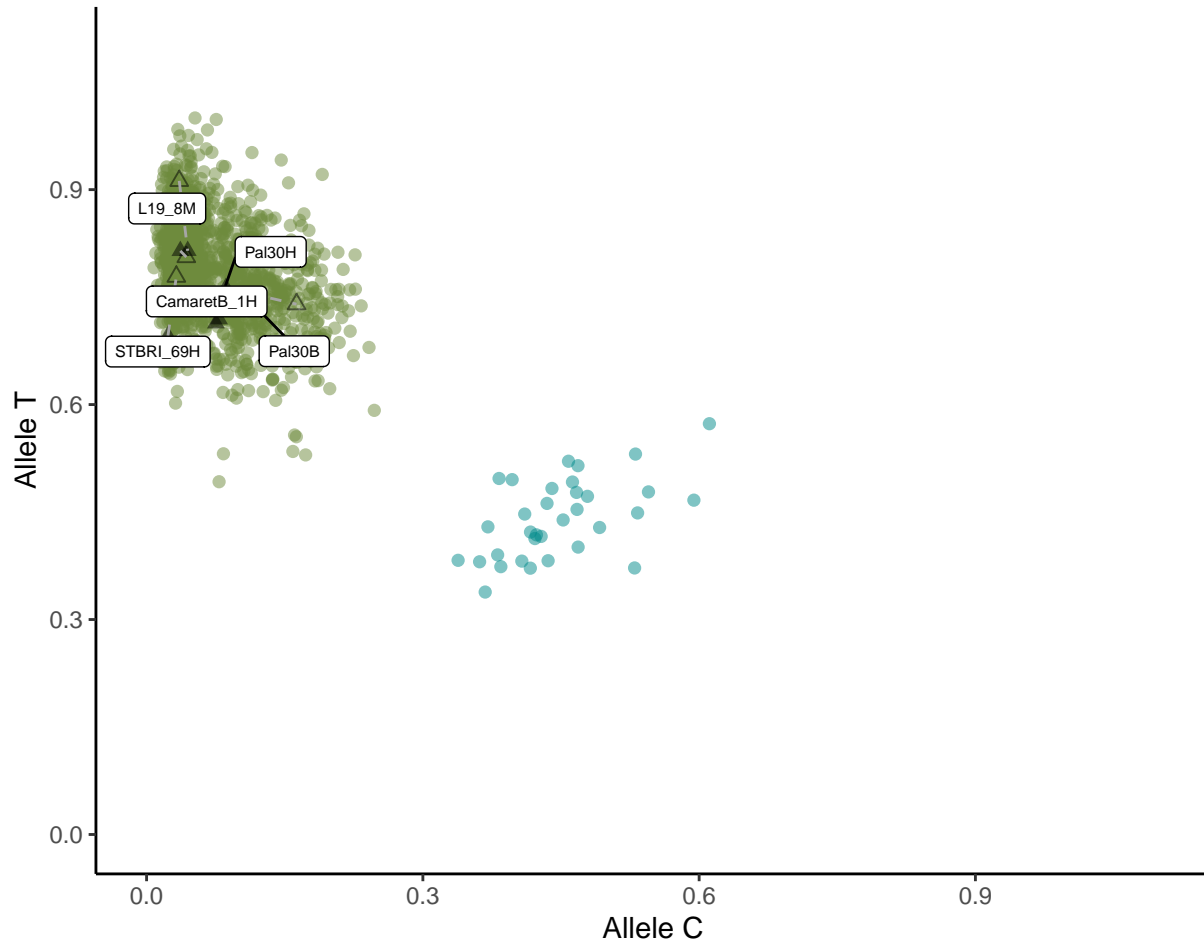

B) Correlation plot: 115-gi\_384113217

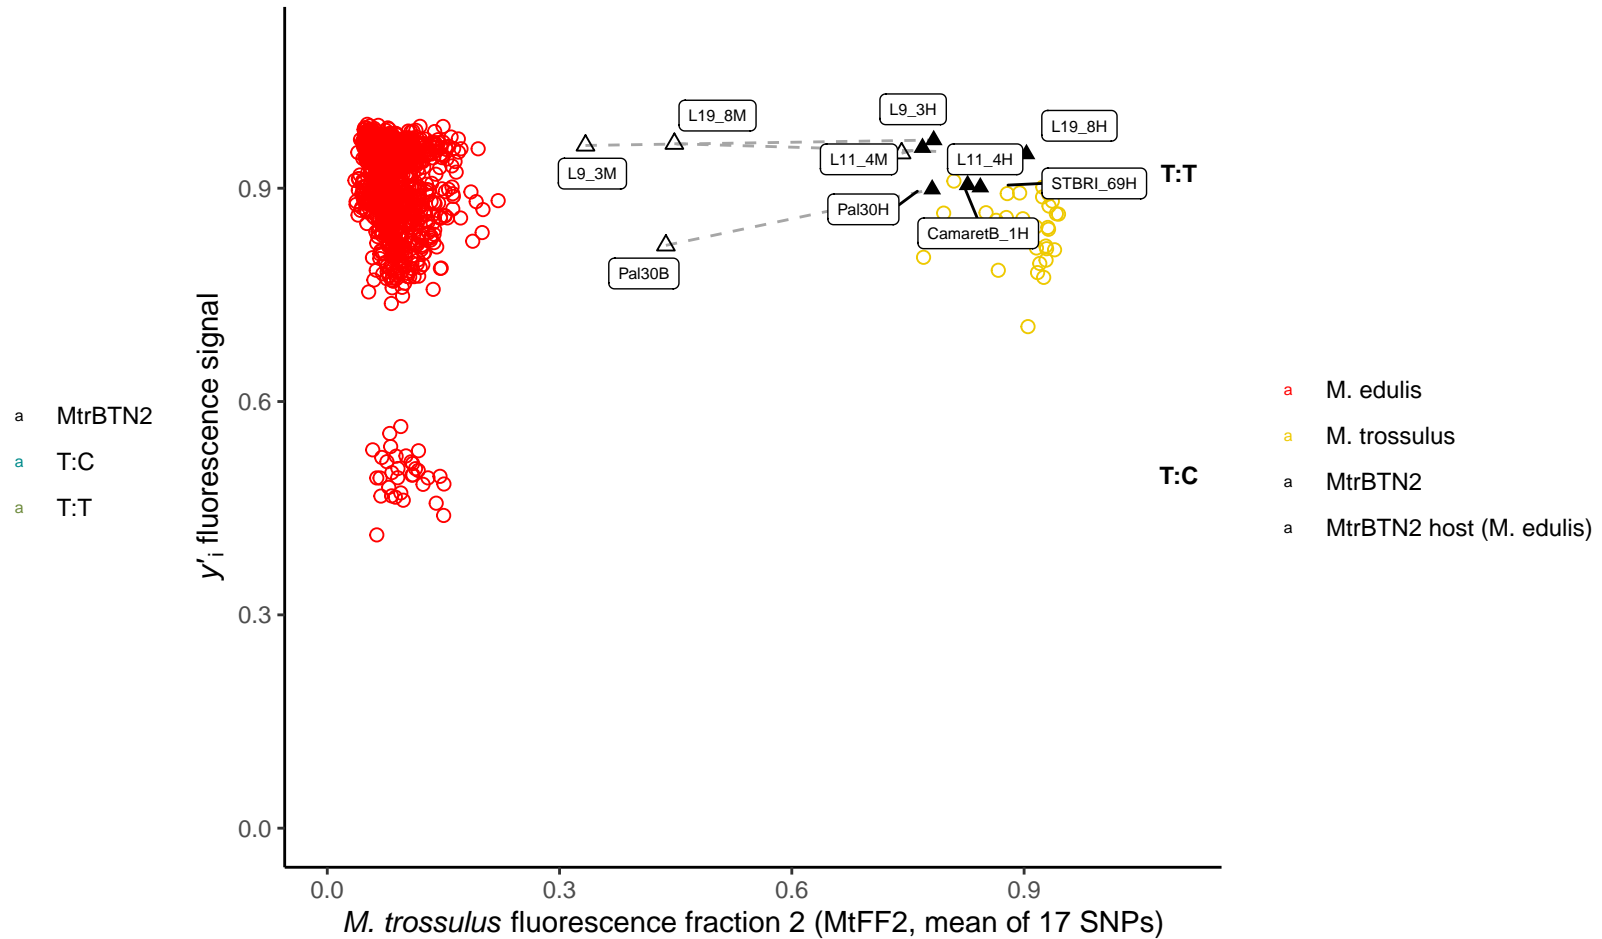

A) KASP fluorescence data plot: 067-C77511\_p1253

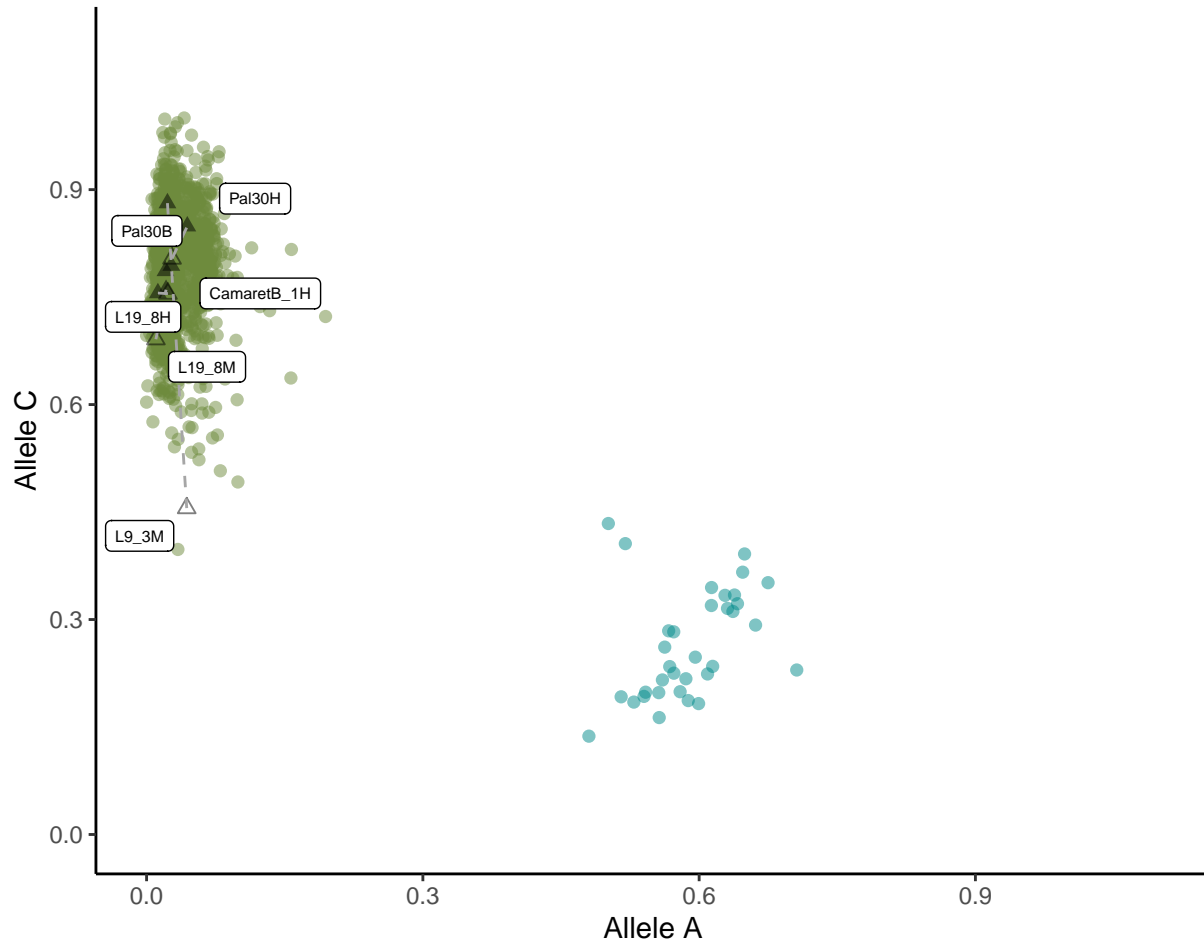

B) Correlation plot: 067-C77511\_p1253

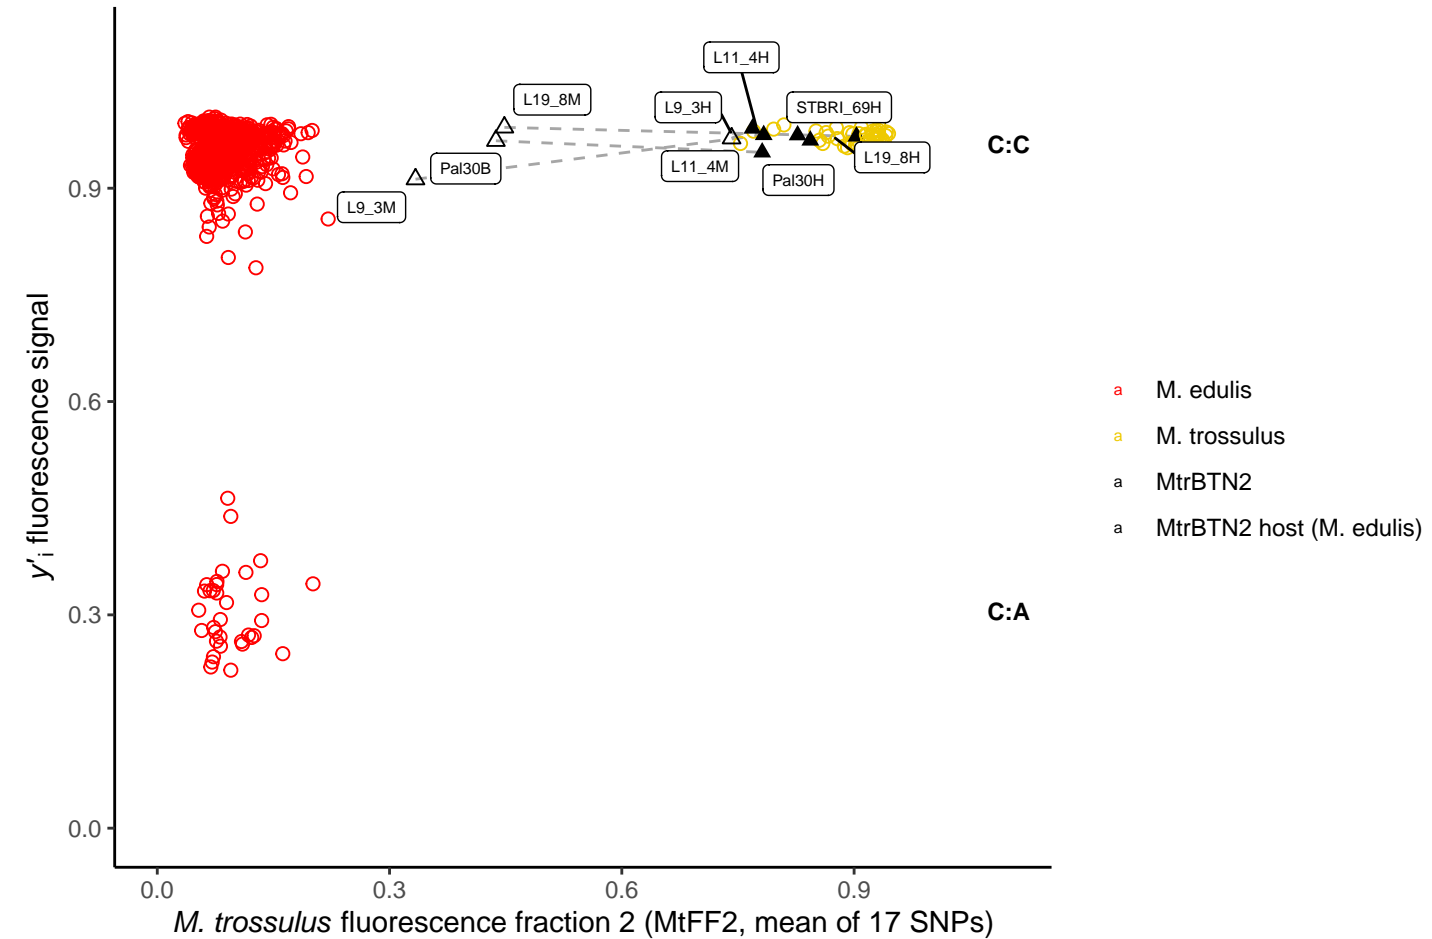

A) KASP fluorescence data plot: 049-C42467\_p335

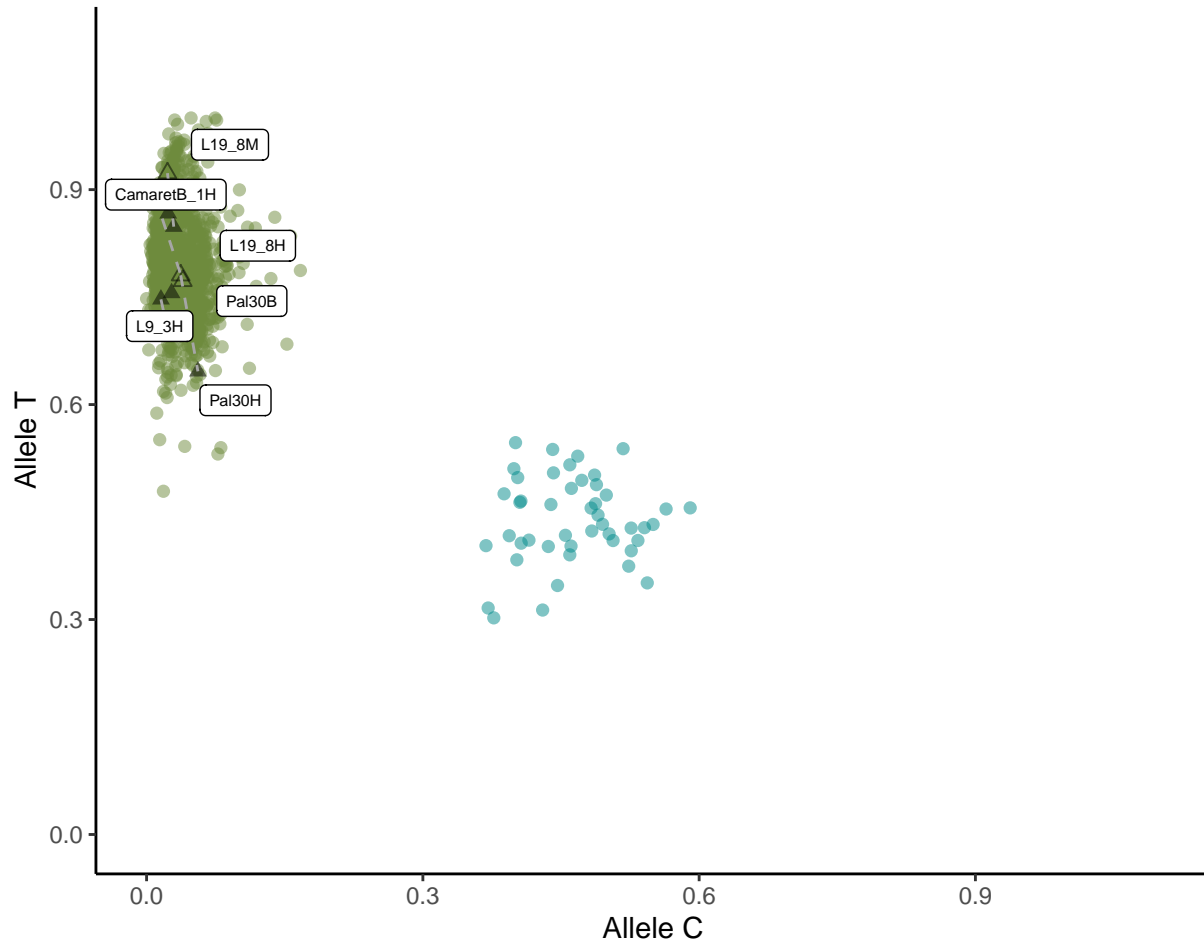

B) Correlation plot: 049-C42467\_p335

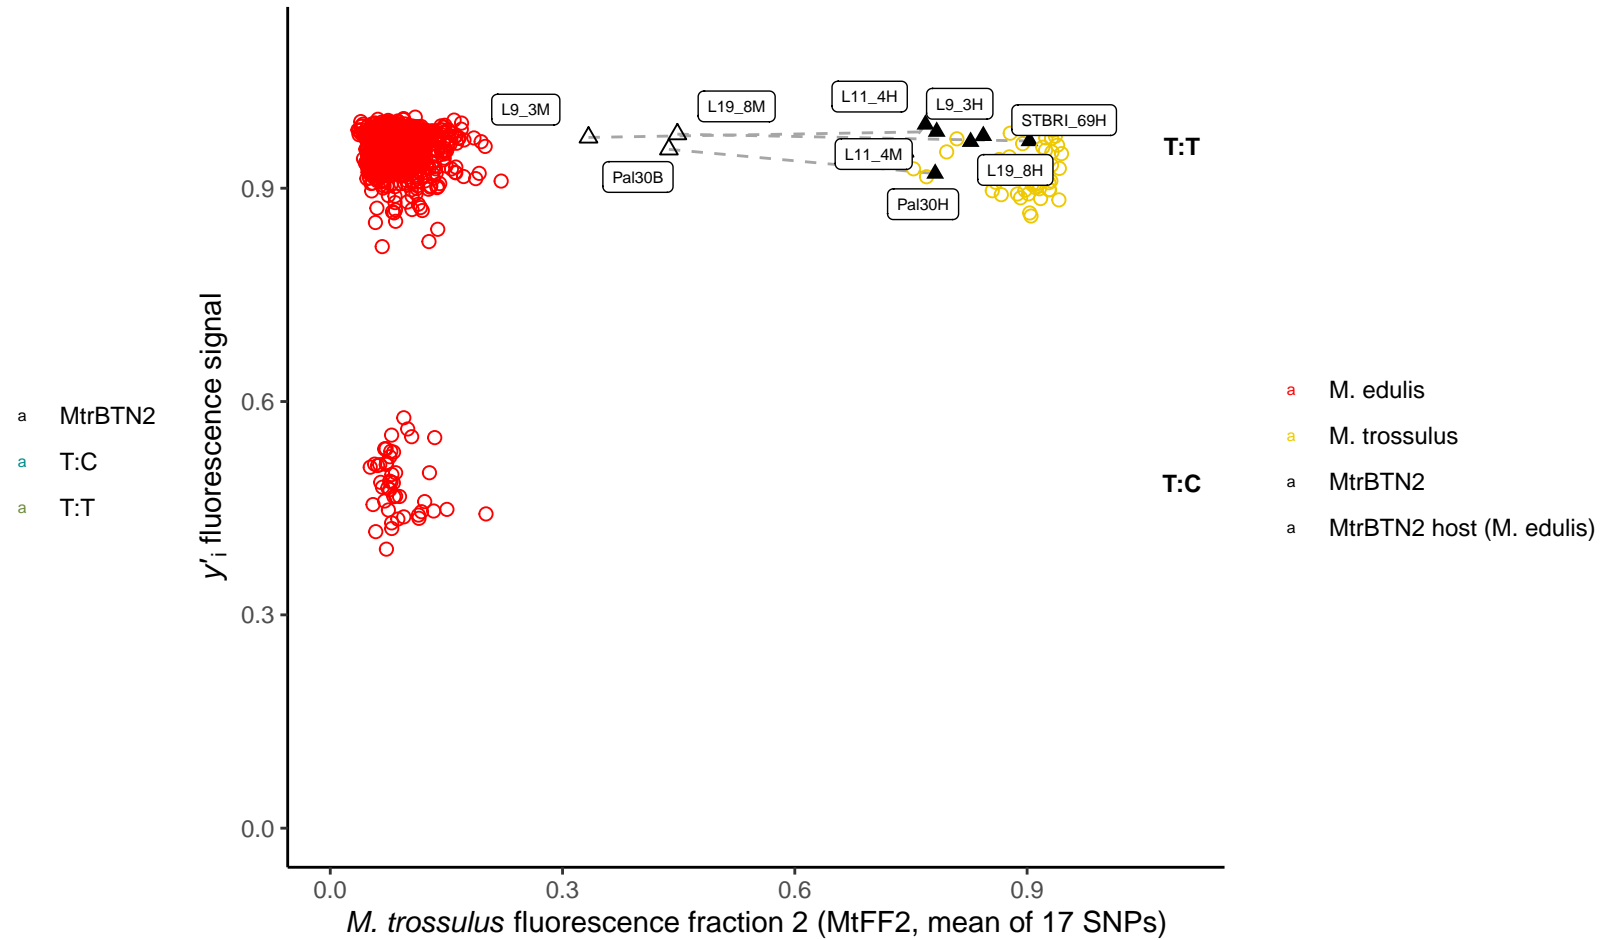

A) KASP fluorescence data plot: 064-C73872\_p884

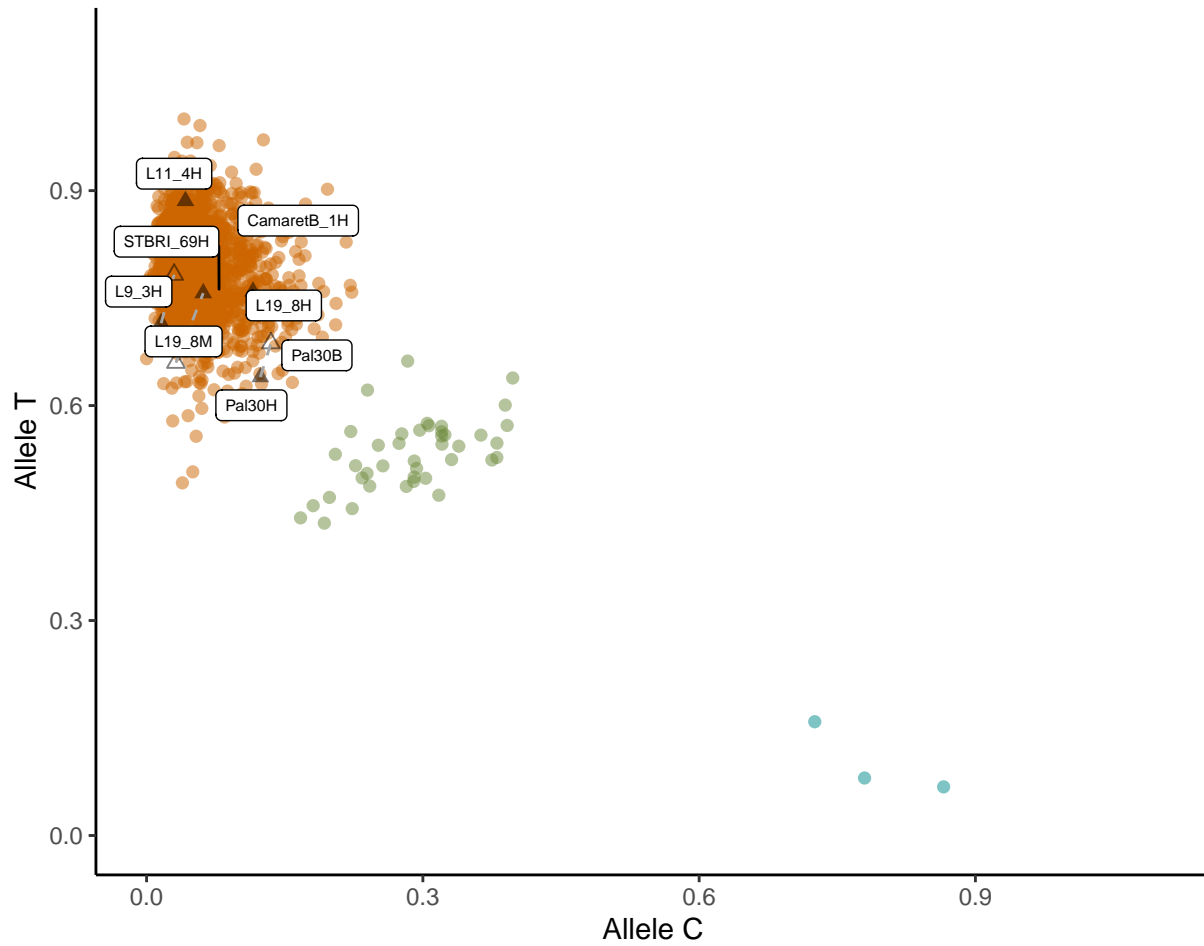

B) Correlation plot: 064-C73872\_p884

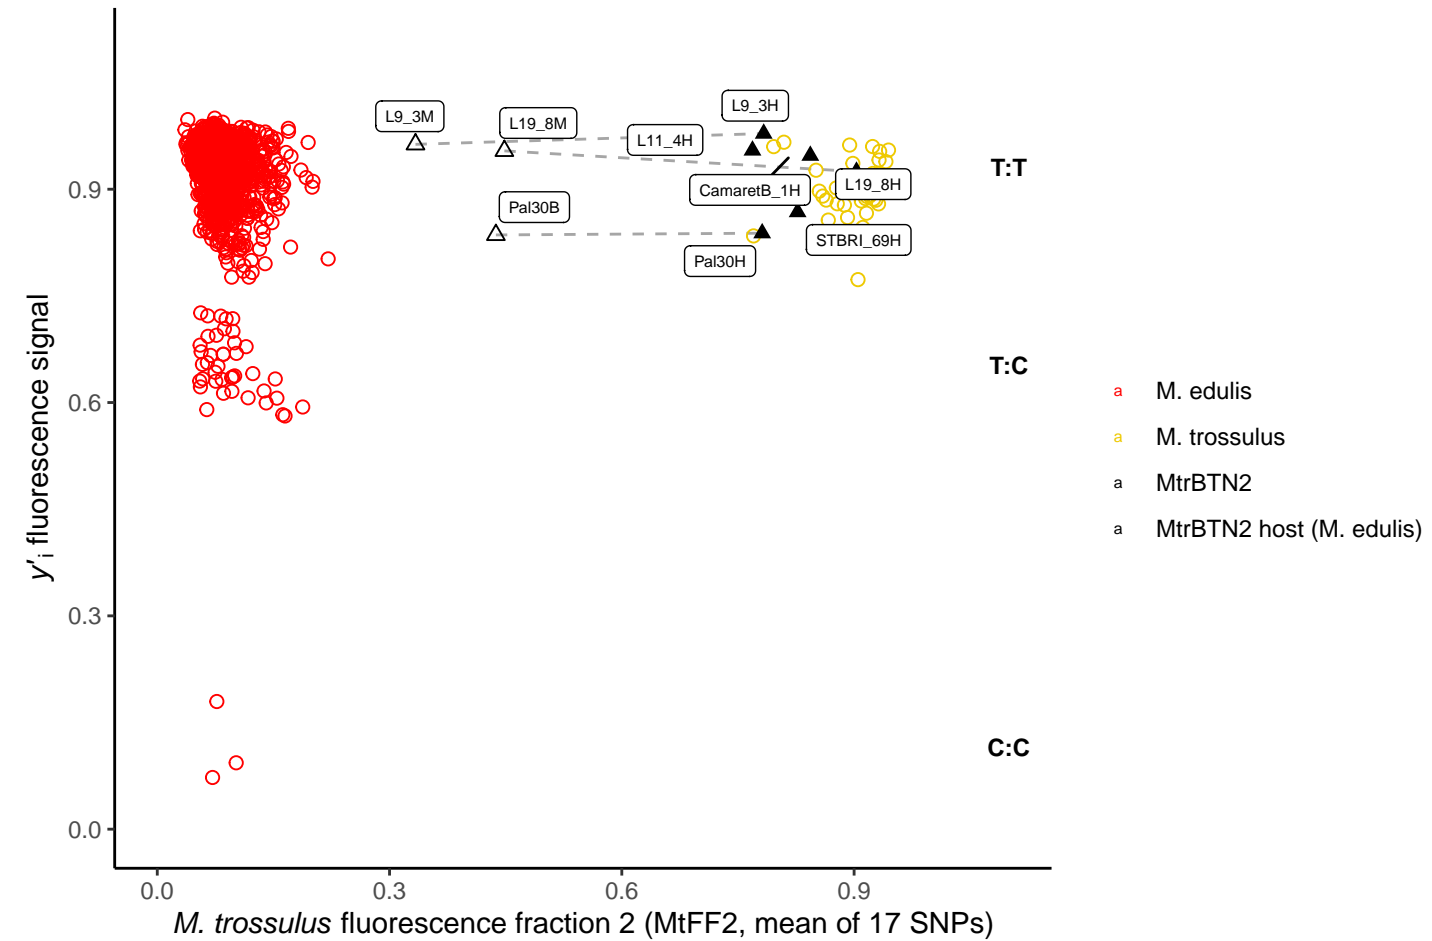



A) KASP fluorescence data plot: 166-soap\_C1072\_p3271

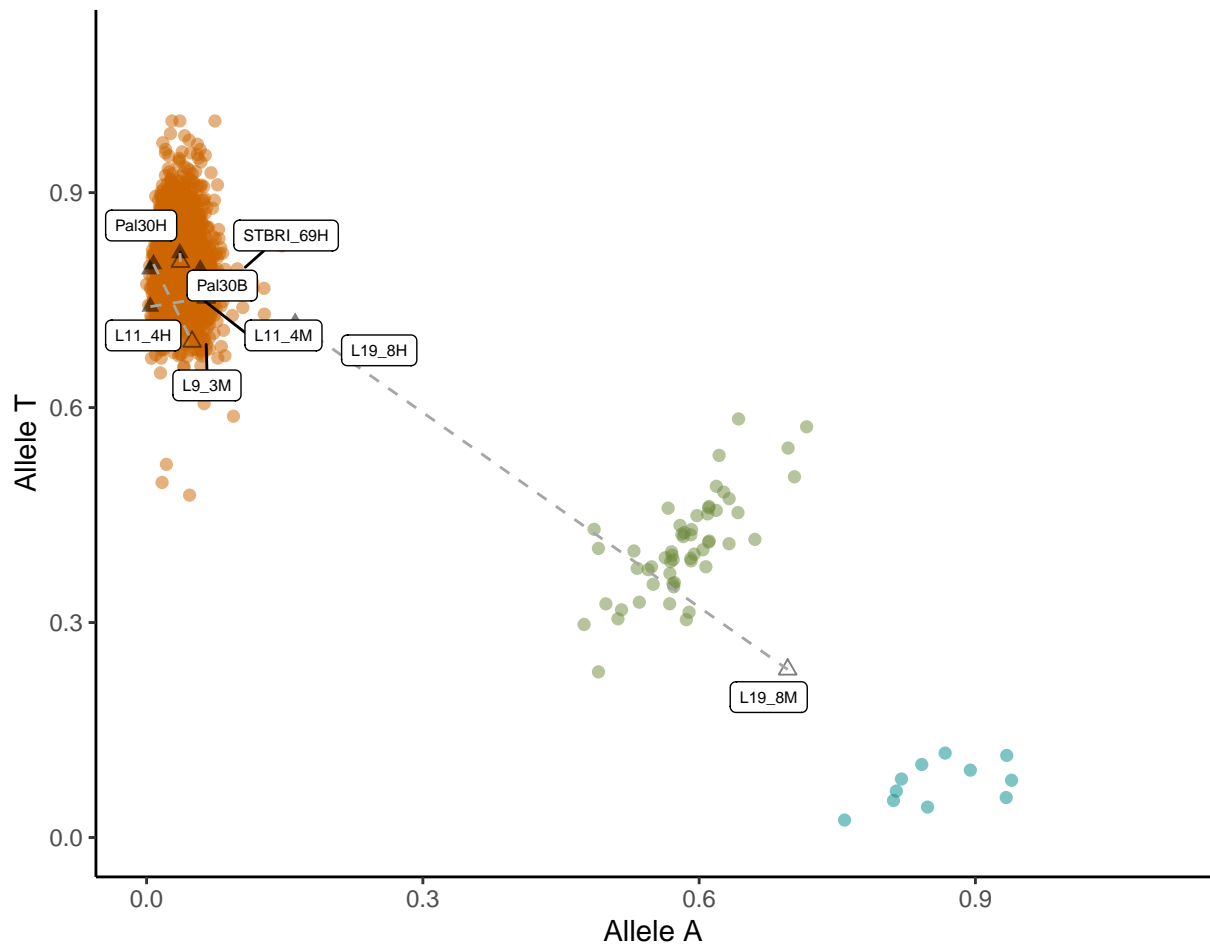

B) Correlation plot: 166-soap\_C1072\_p3271

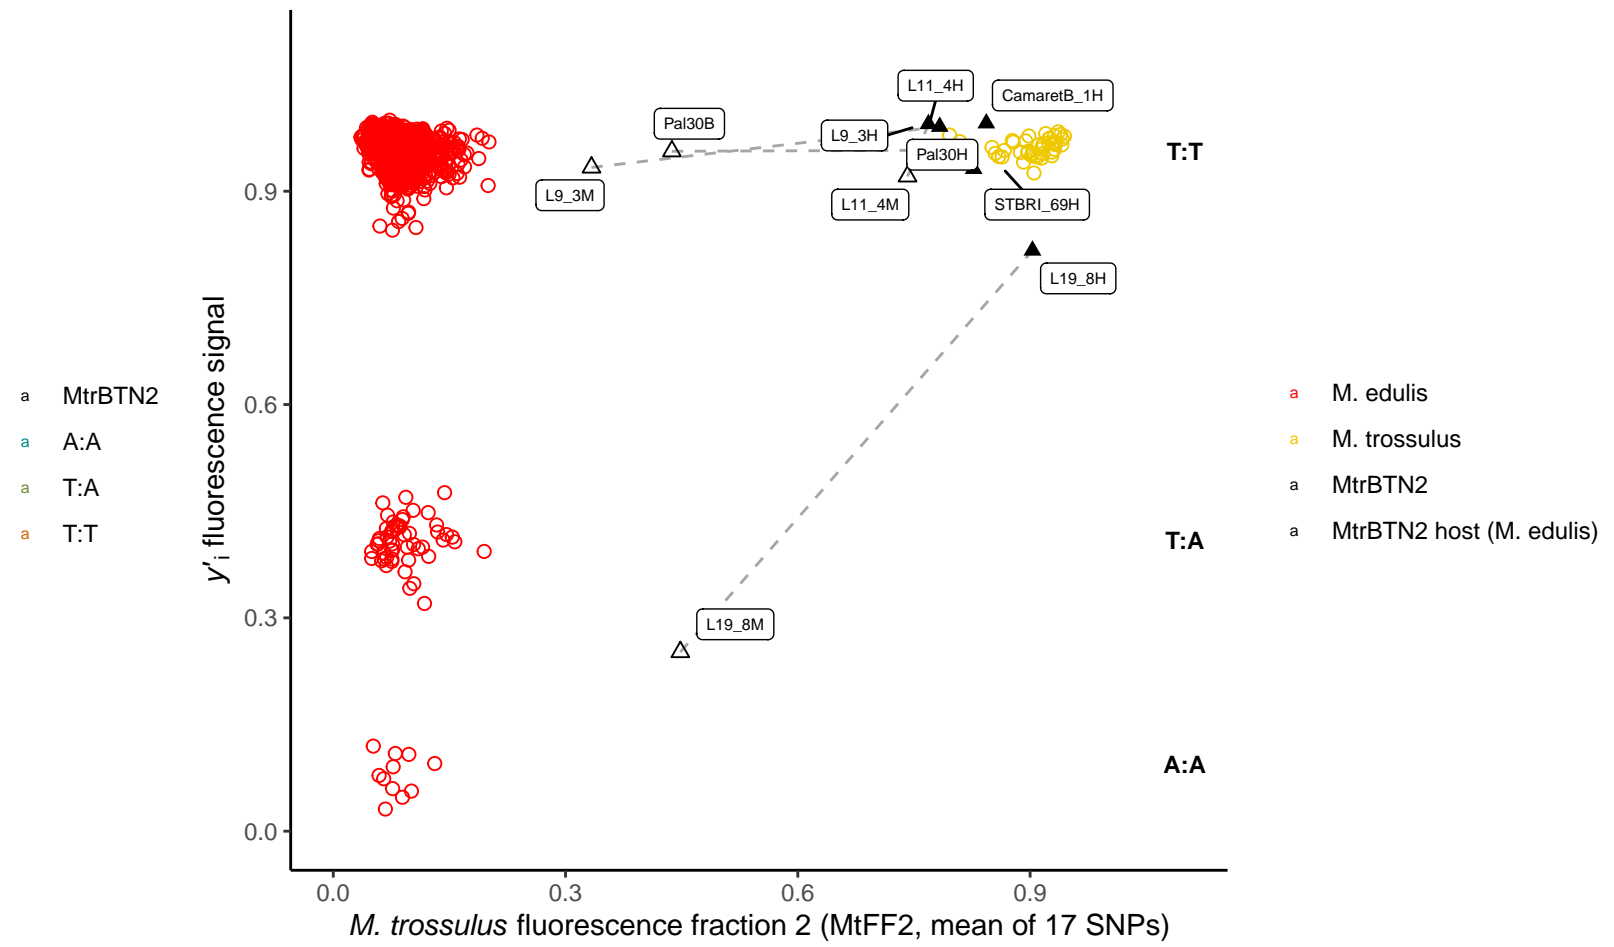

A) KASP fluorescence data plot: 099-gi\_238644156

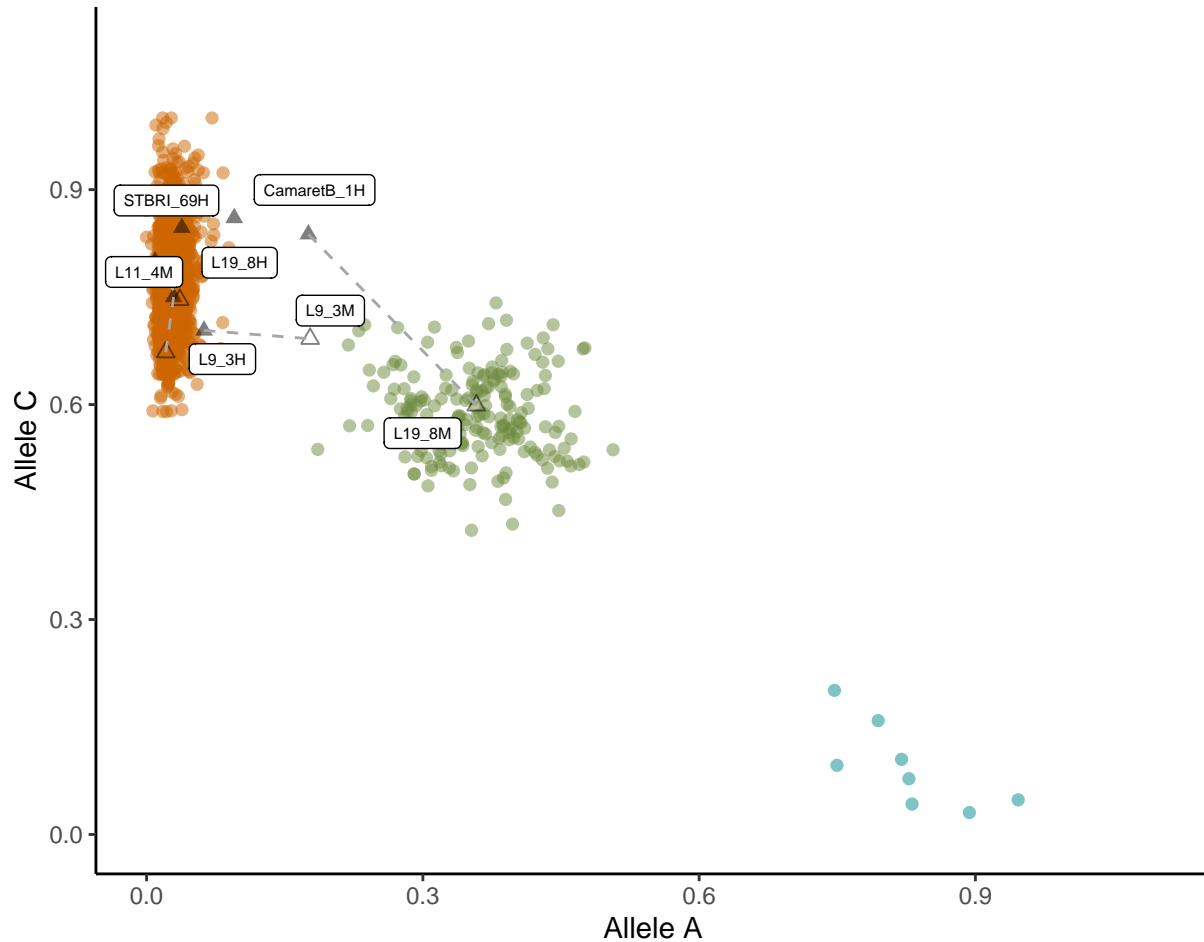

B) Correlation plot: 099-gi\_238644156

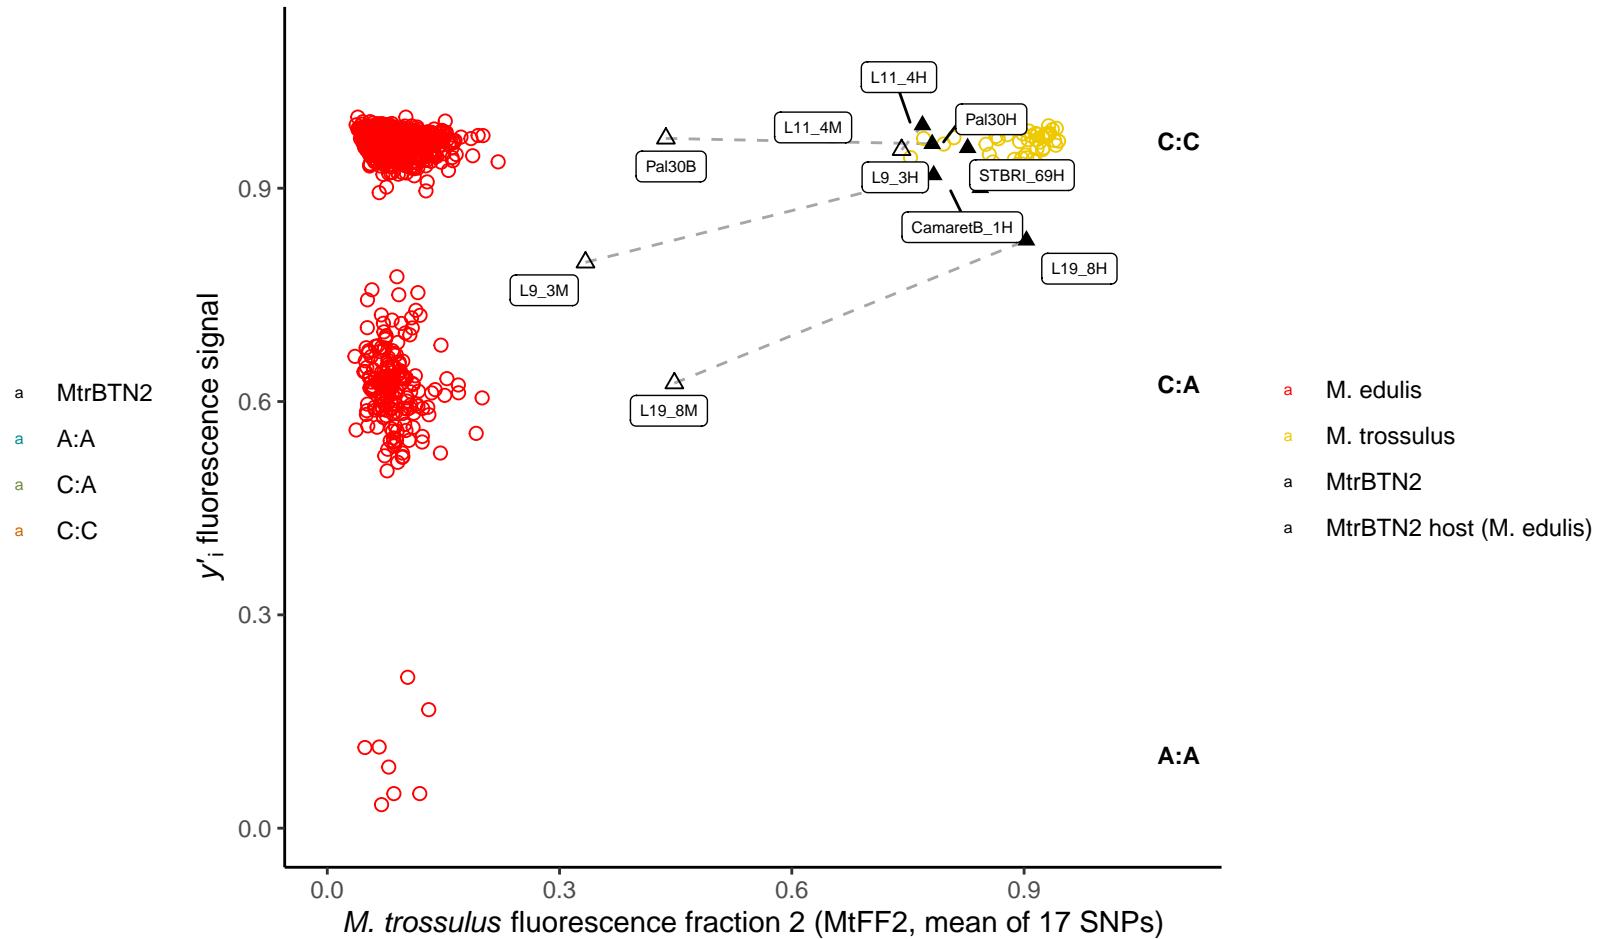

A) KASP fluorescence data plot: 055-C4715\_p1037

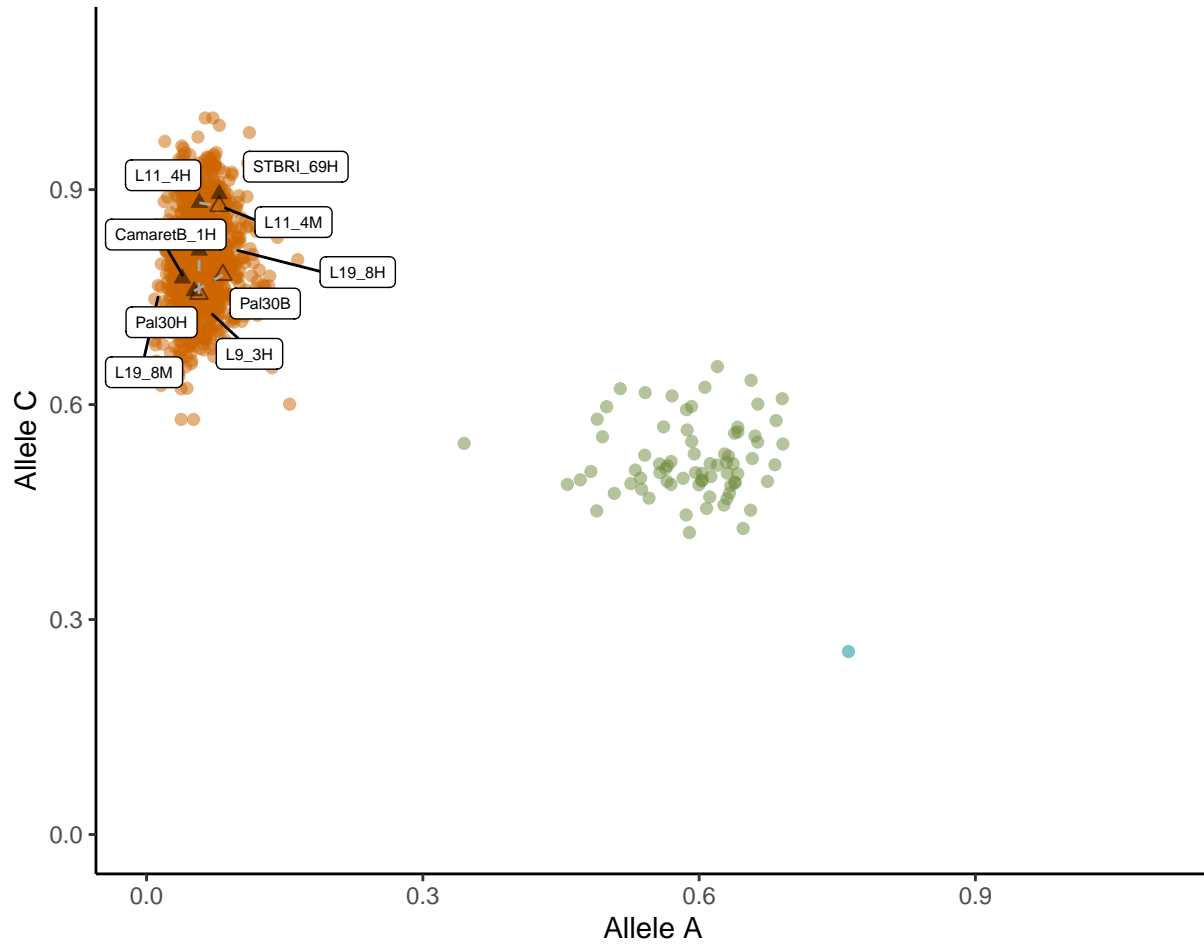

B) Correlation plot: 055-C4715\_p1037

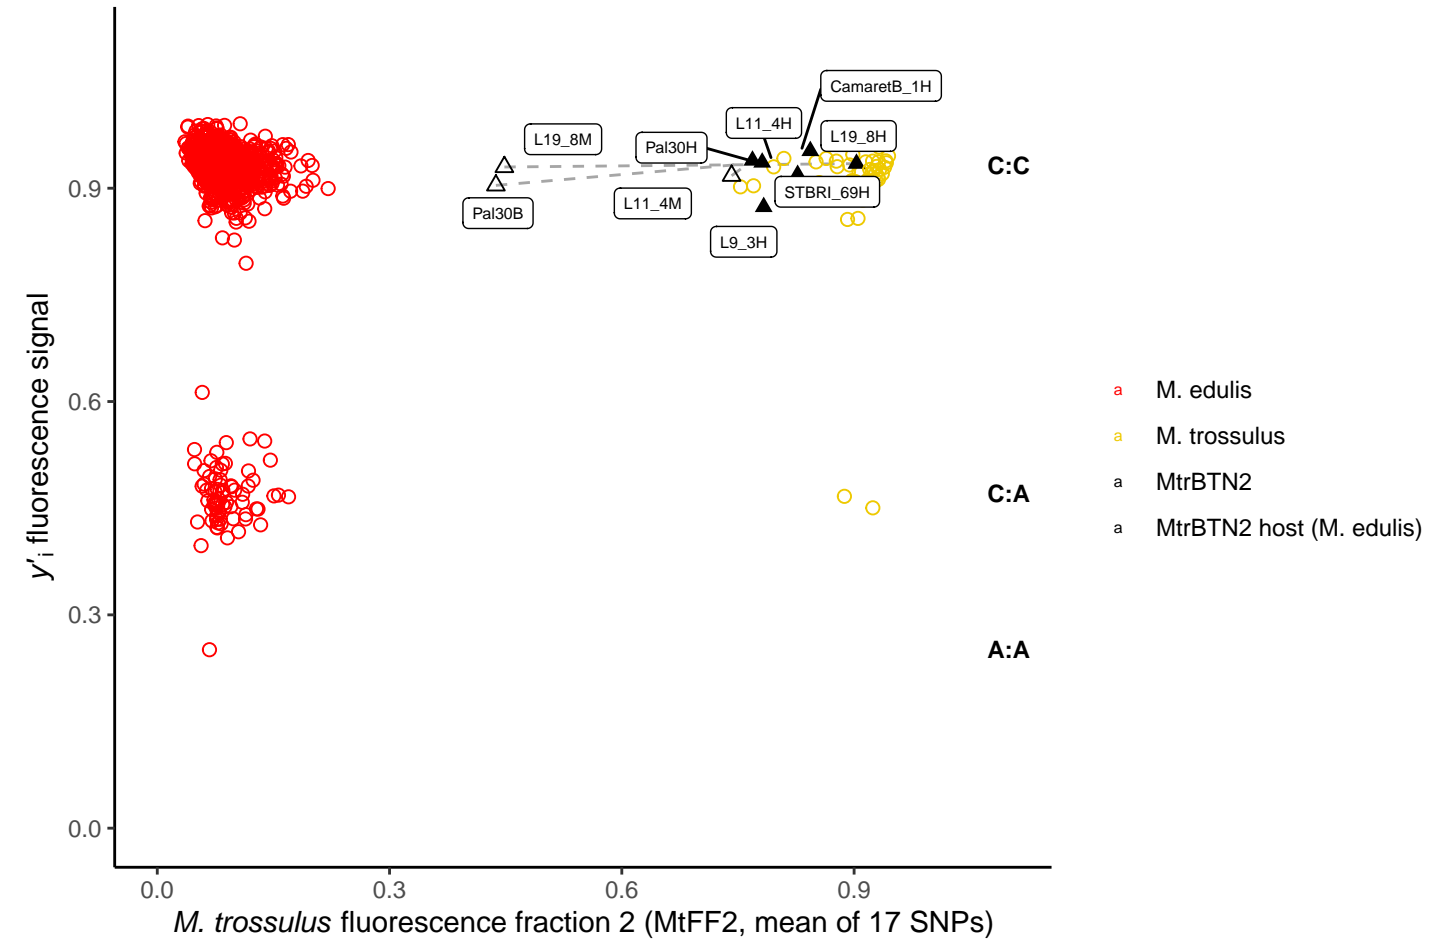

A) KASP fluorescence data plot: 159–abyss\_C783\_p5373

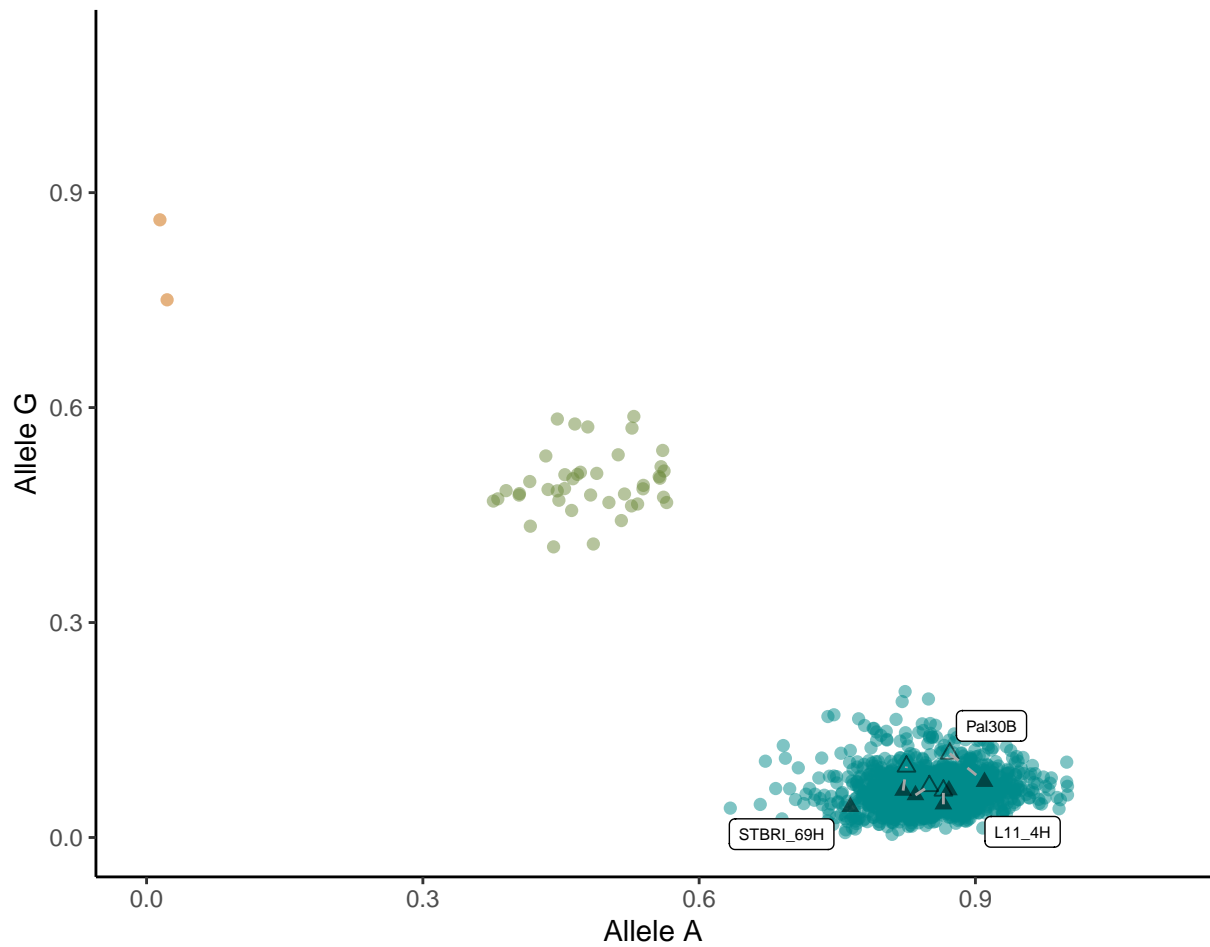

B) Correlation plot: 159–abyss\_C783\_p5373

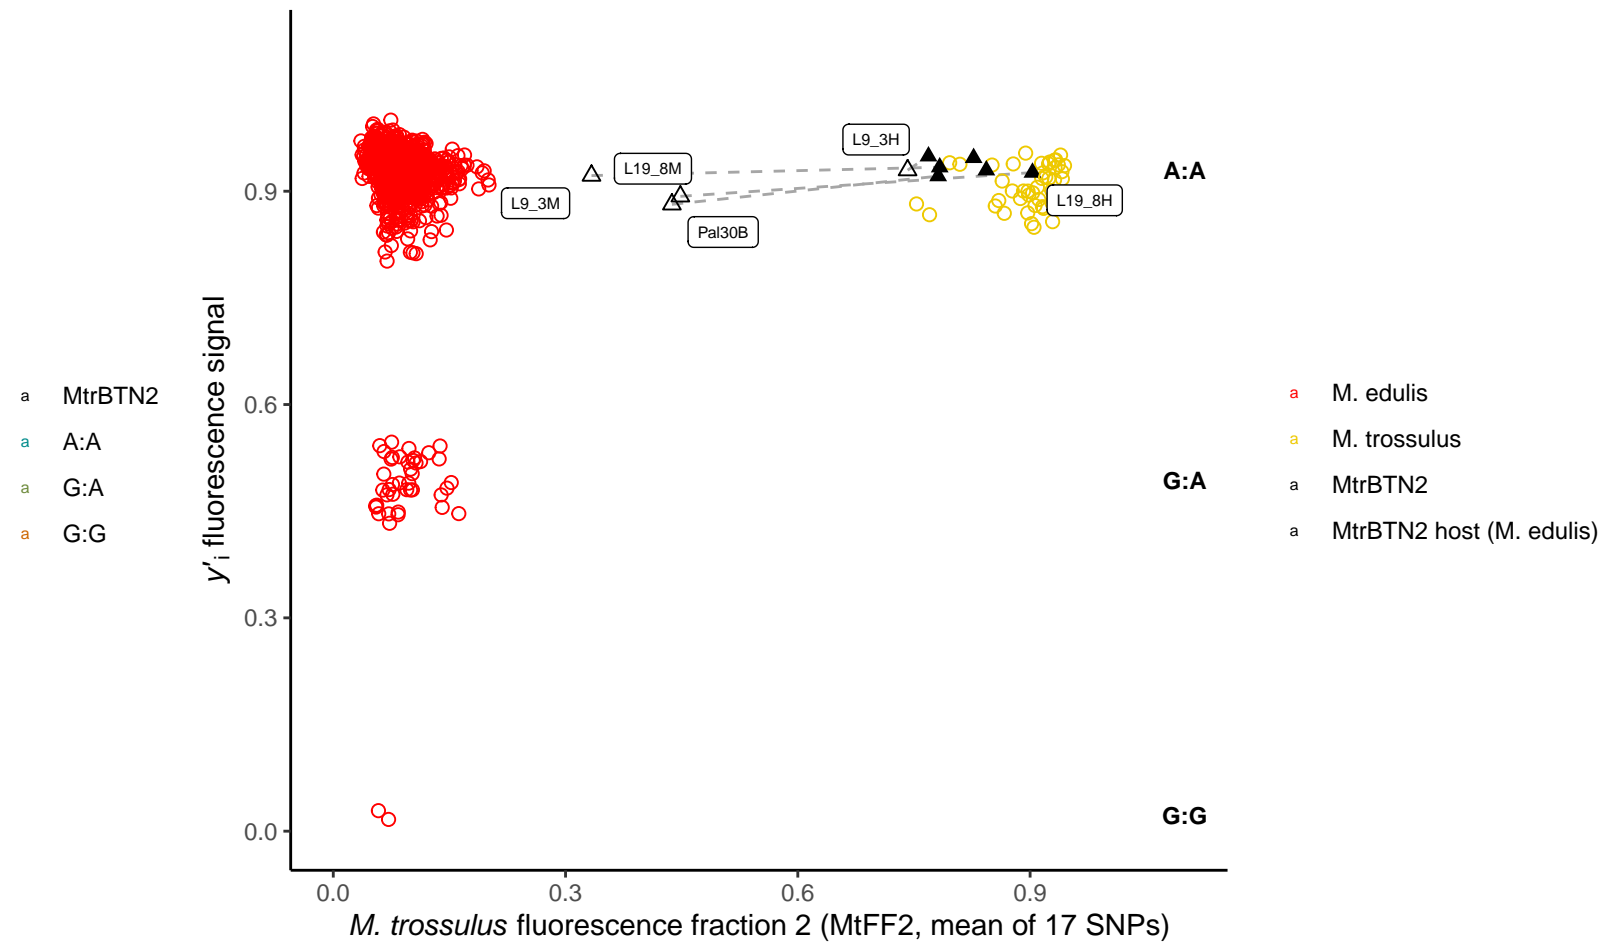

A) KASP fluorescence data plot: 124-gi\_387154968

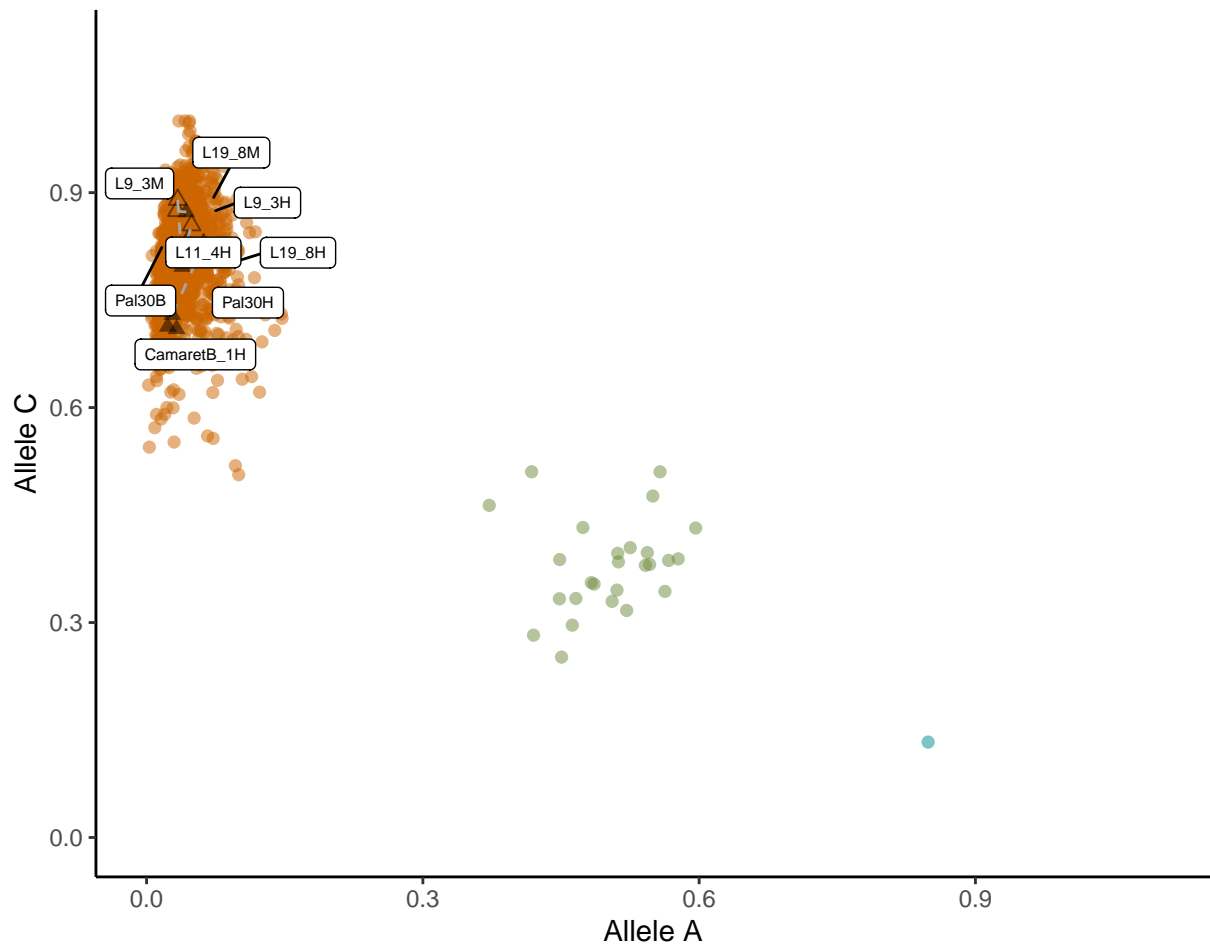

B) Correlation plot: 124-gi\_387154968

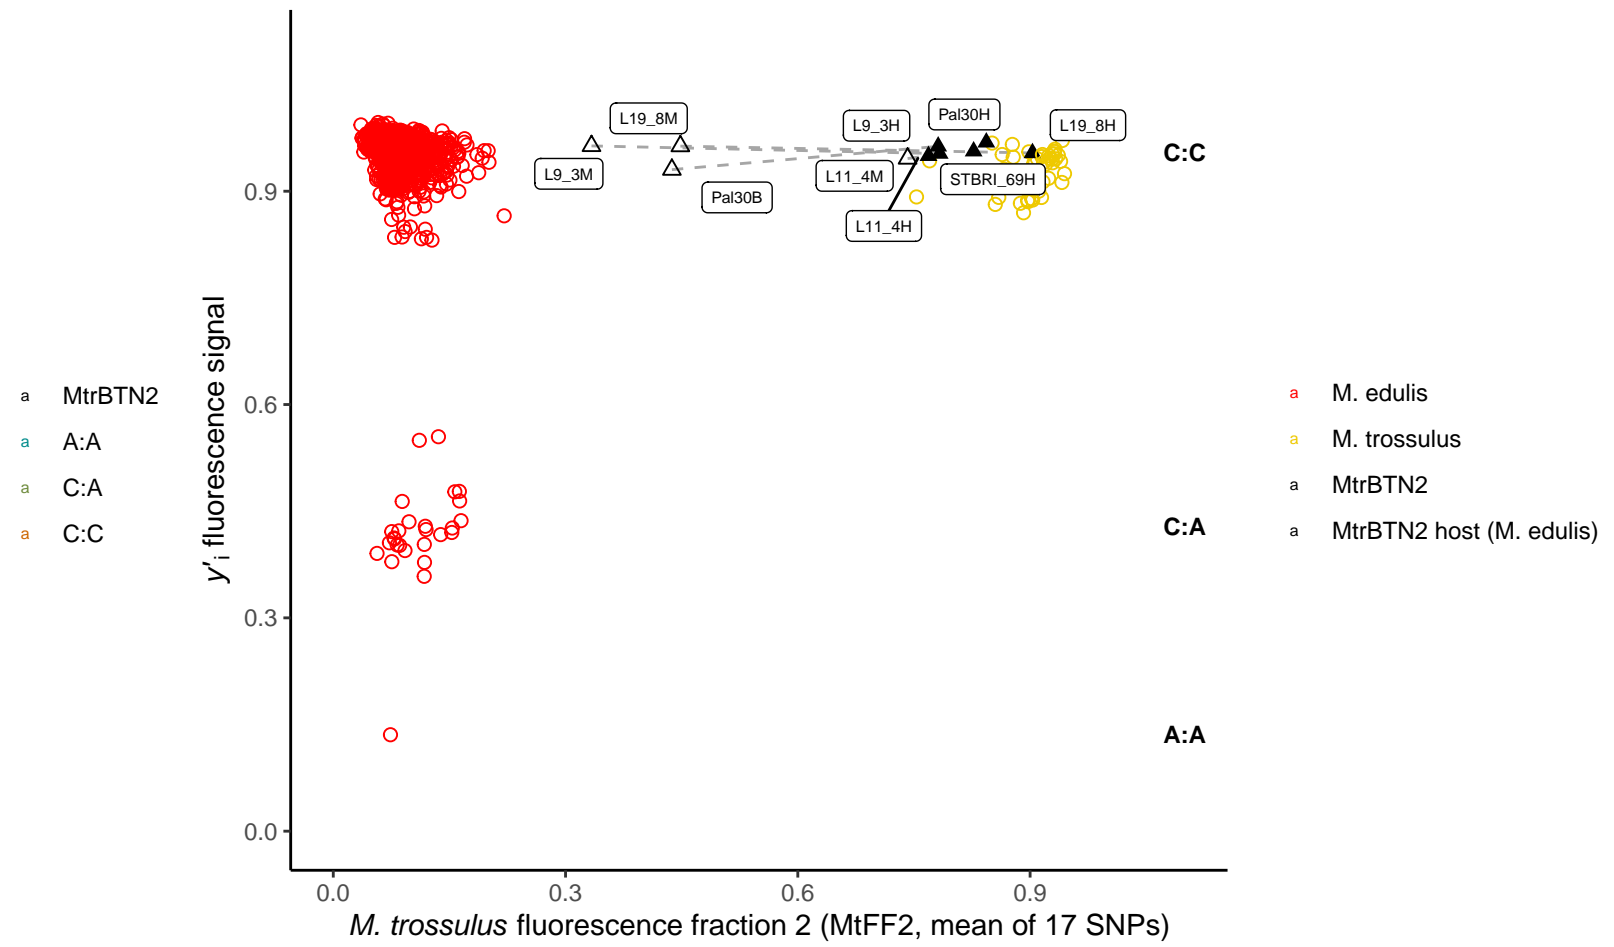

A) KASP fluorescence data plot: 701-C116849\_p267

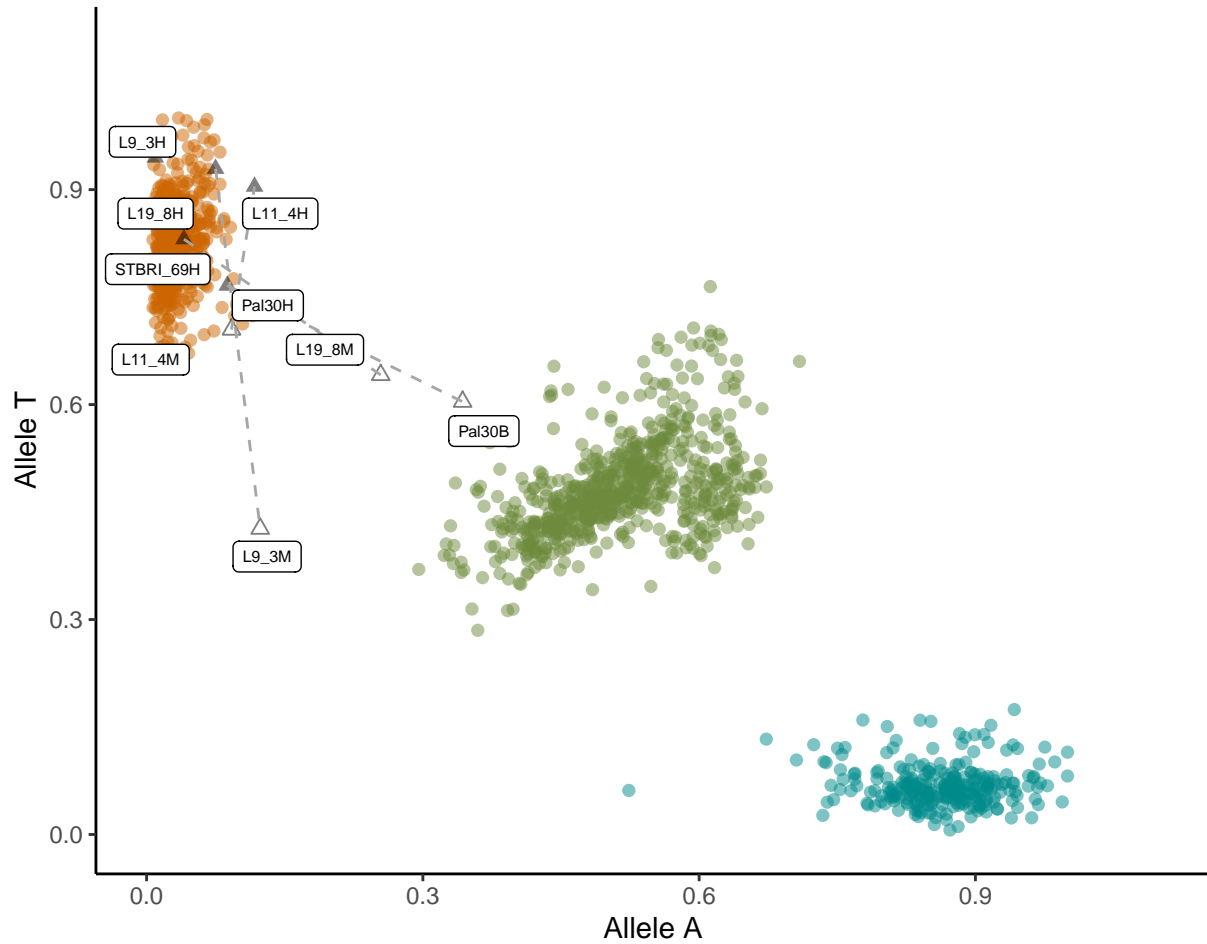

B) Correlation plot: 701-C116849\_p267

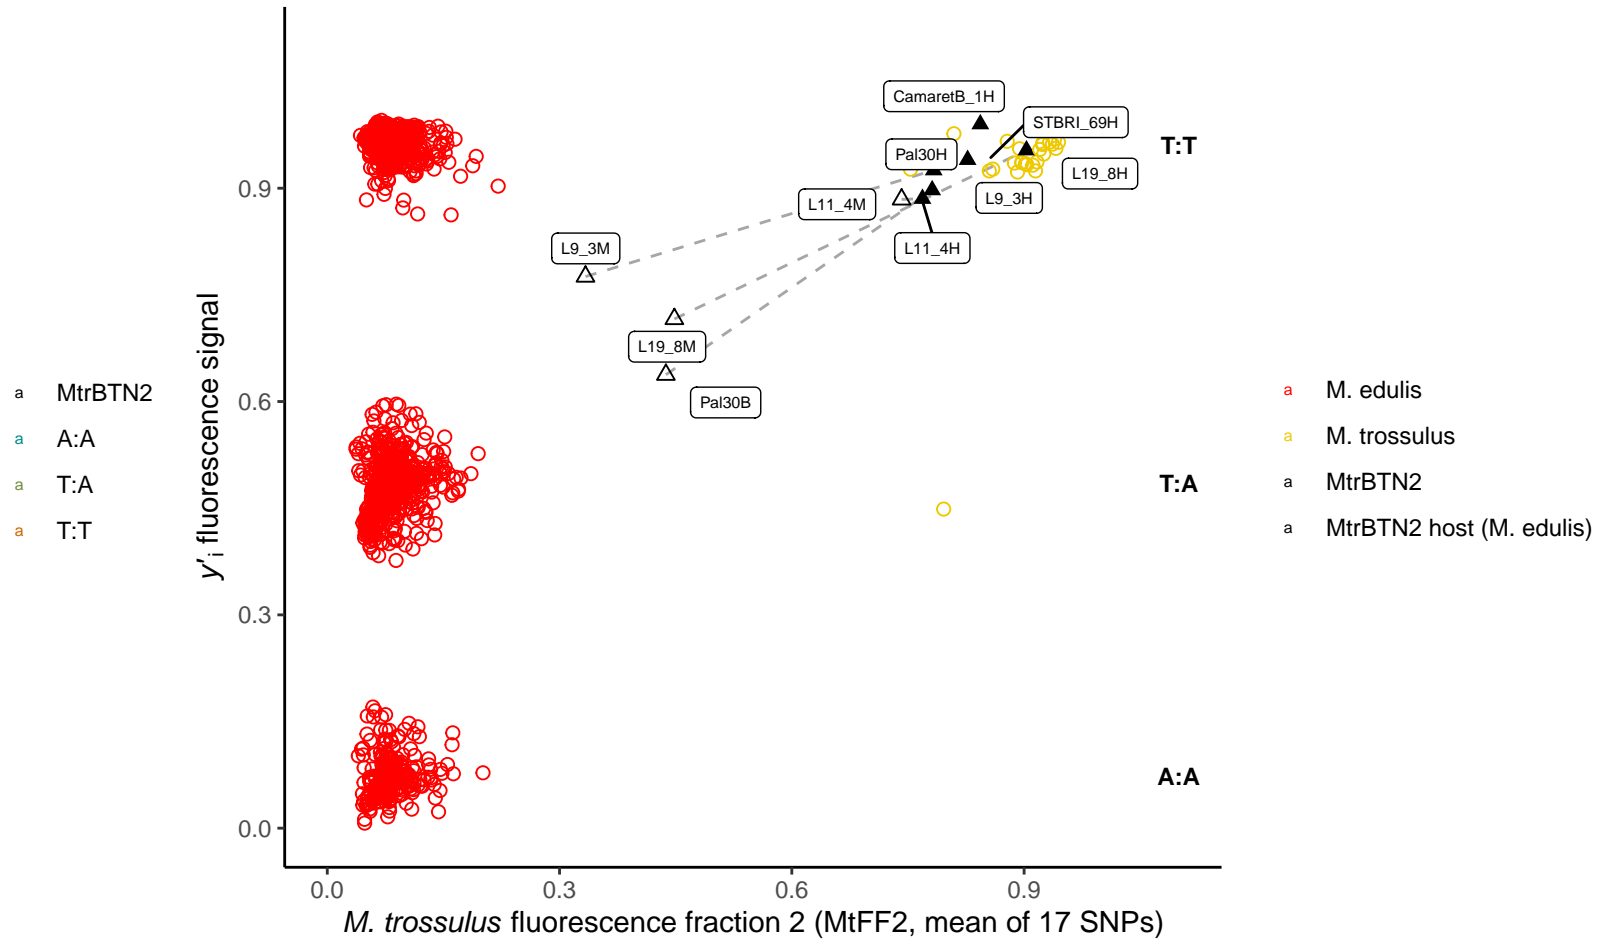

A) KASP fluorescence data plot: 040-C33286\_p476

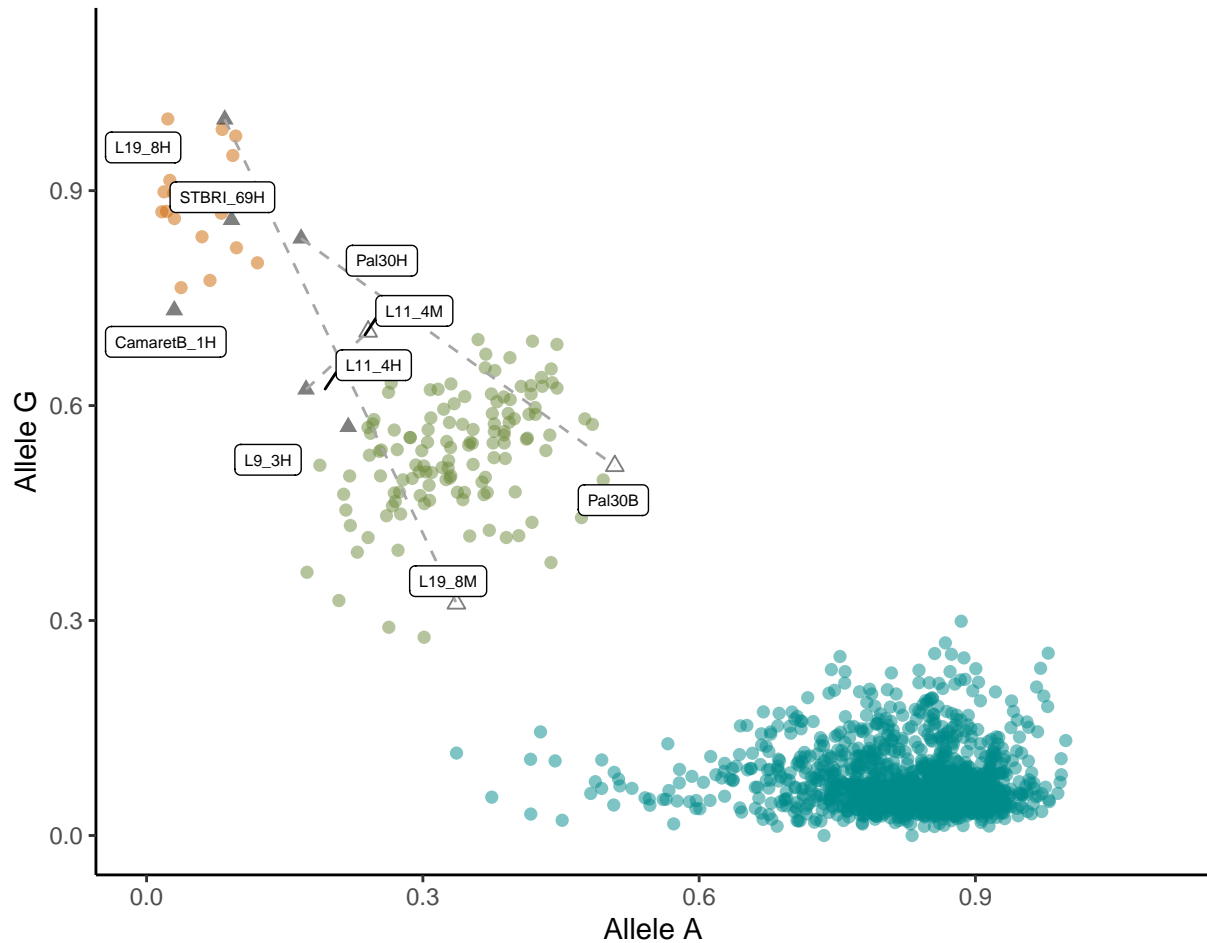

B) Correlation plot: 040-C33286\_p476

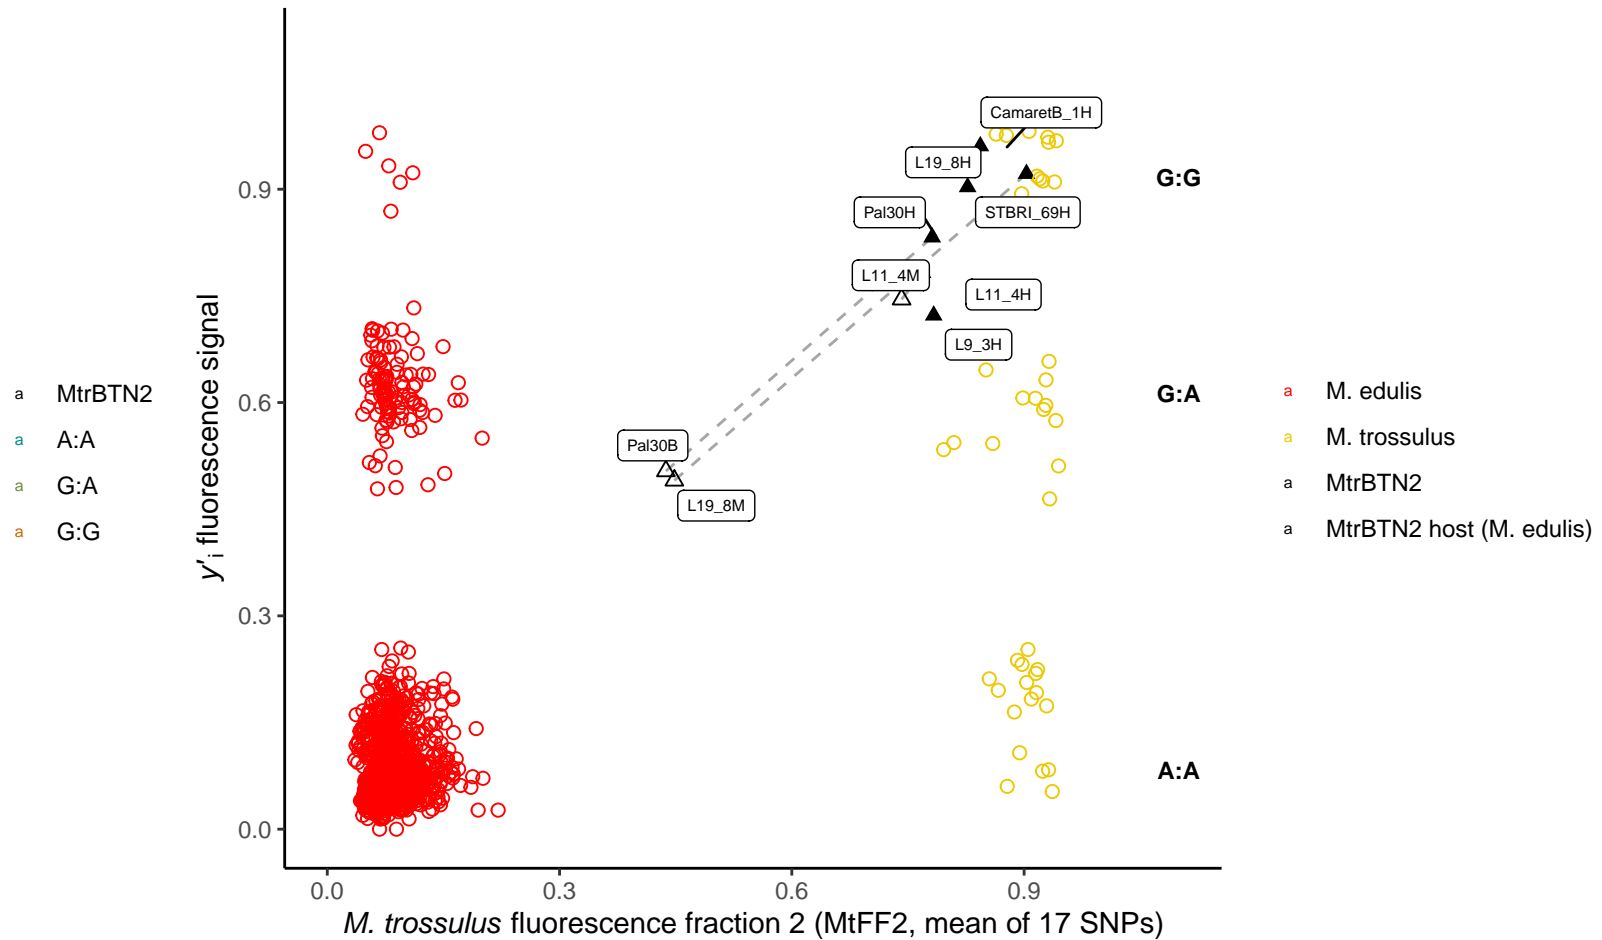

A) KASP fluorescence data plot: 068-Contig77541\_pos349\_Edu\_EU\_US

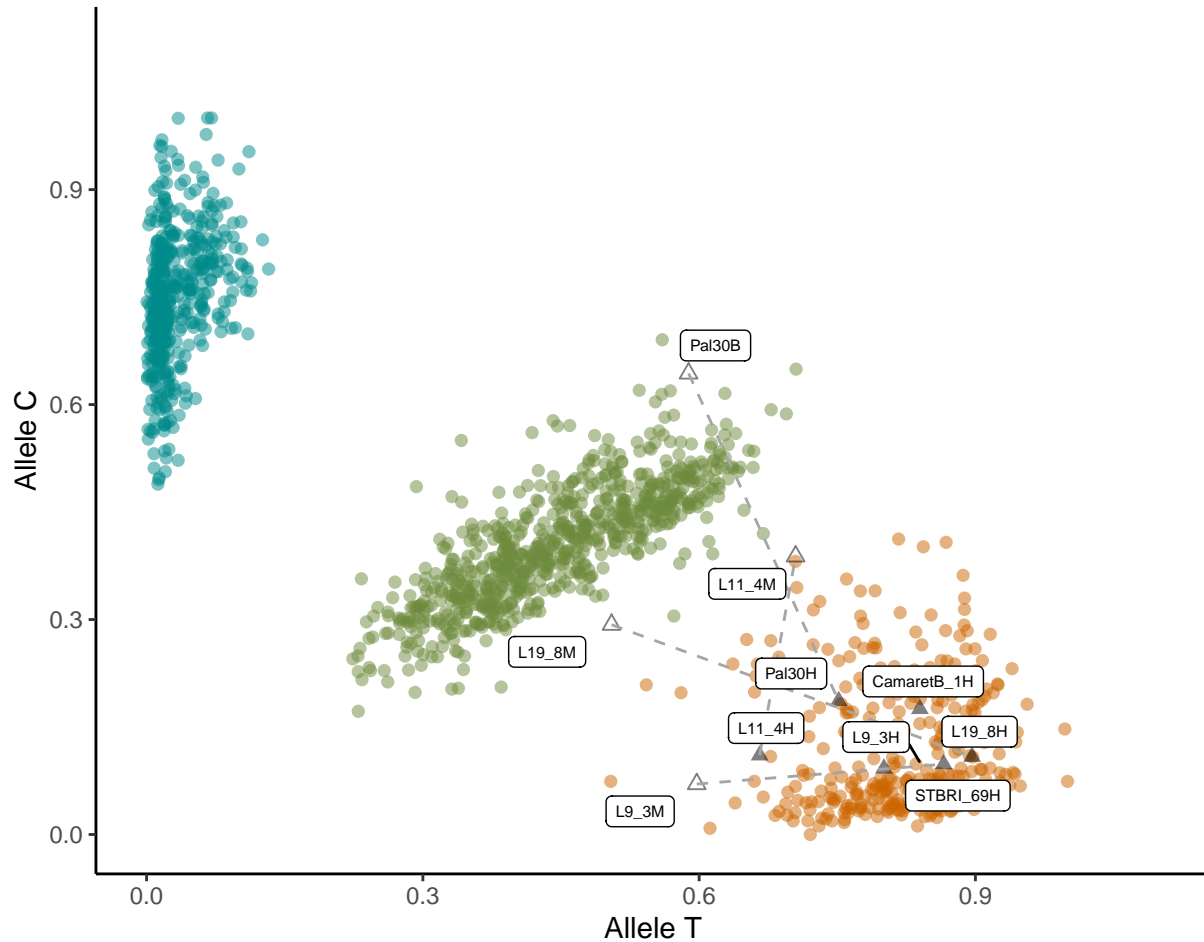

B) Correlation plot: 068-Contig77541\_pos349\_Edu\_EU\_US

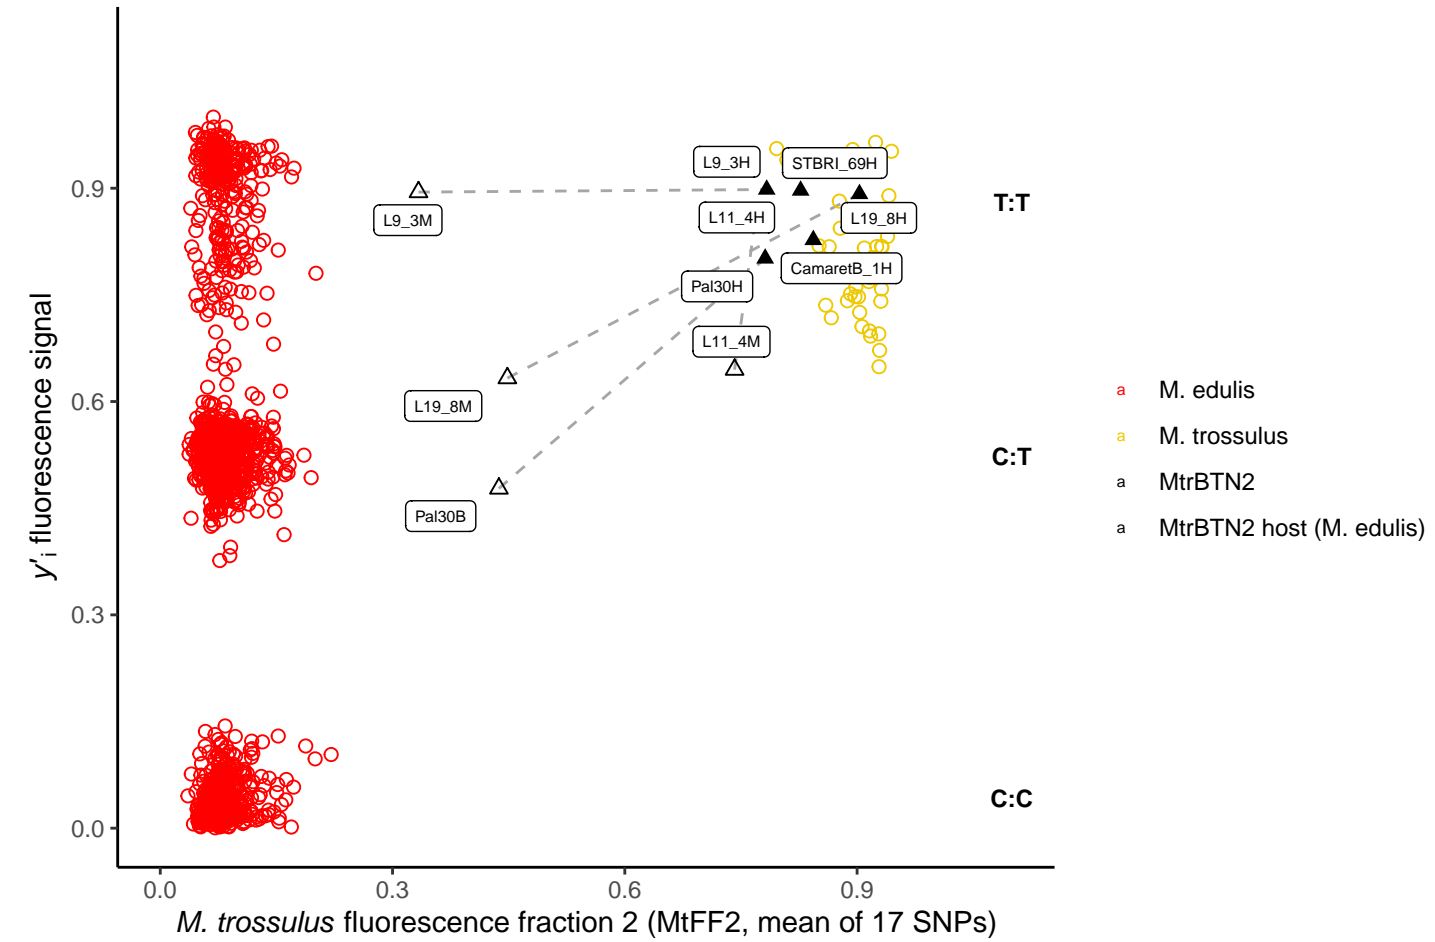



A) KASP fluorescence data plot: 428-gi\_384575681\_emb\_HE609049\_p1650

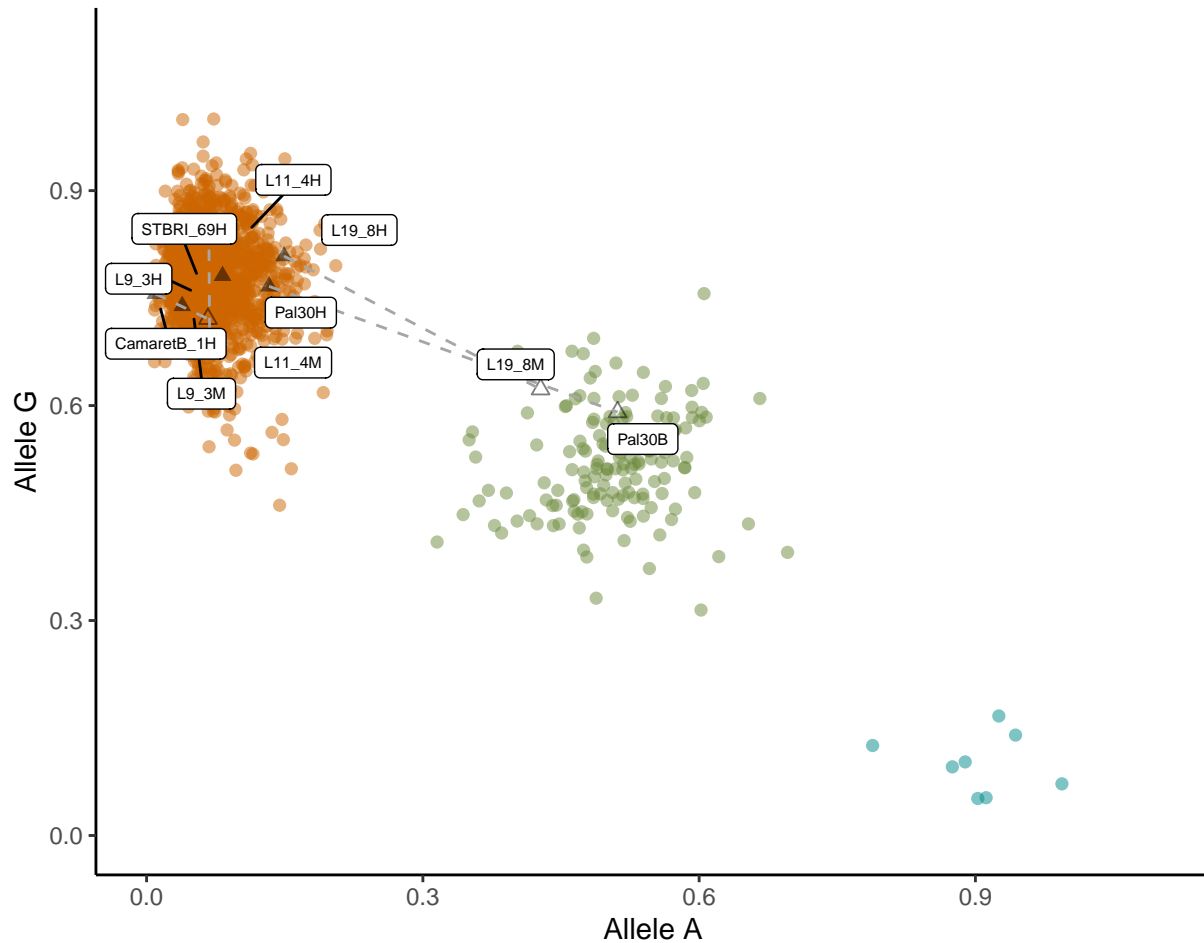

B) Correlation plot: 428-gi\_384575681\_emb\_HE609049\_p1650

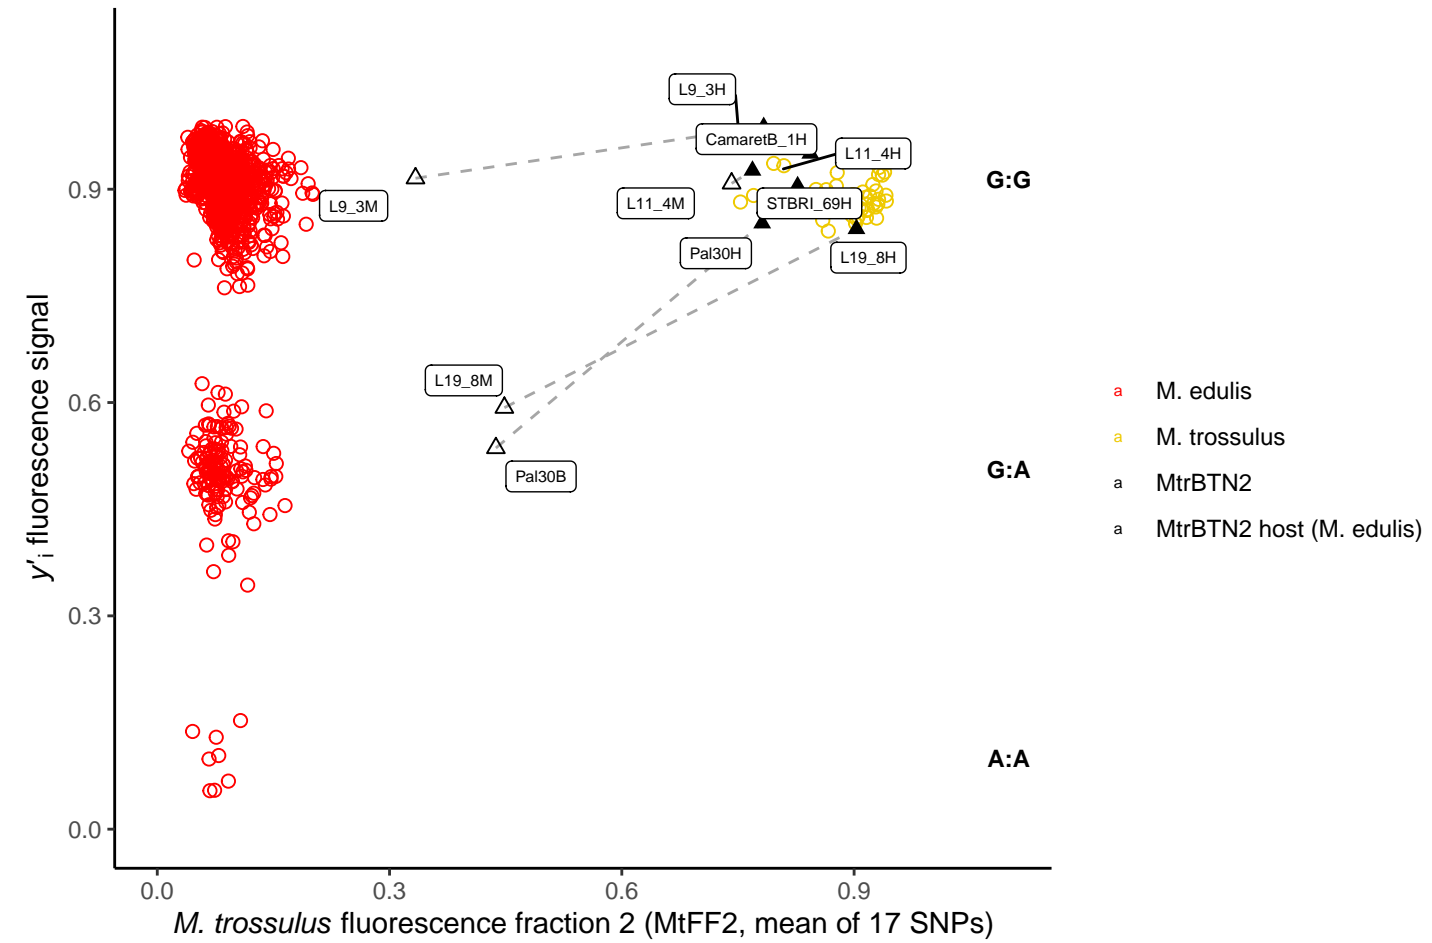

A) KASP fluorescence data plot: 050-C42717\_p722

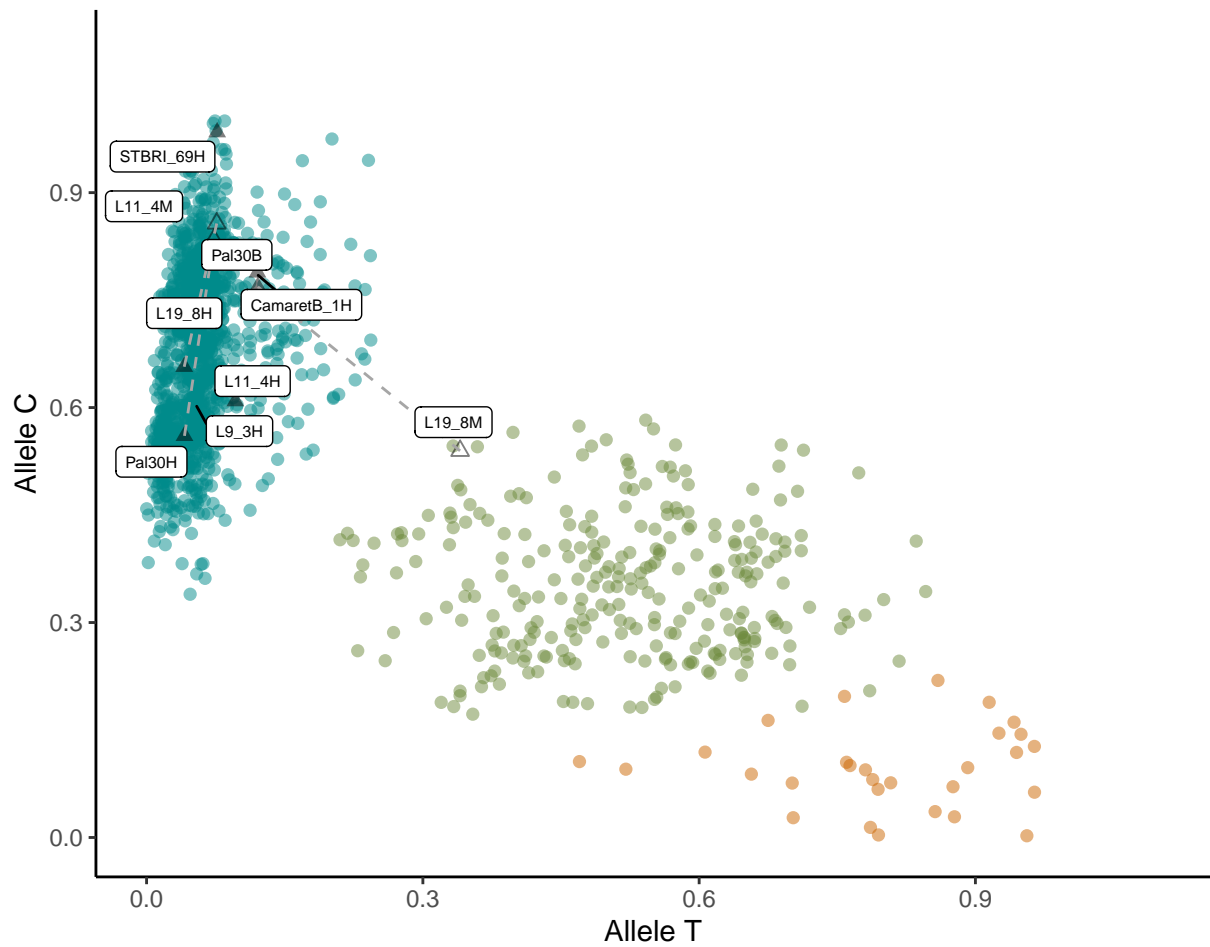

B) Correlation plot: 050-C42717\_p722

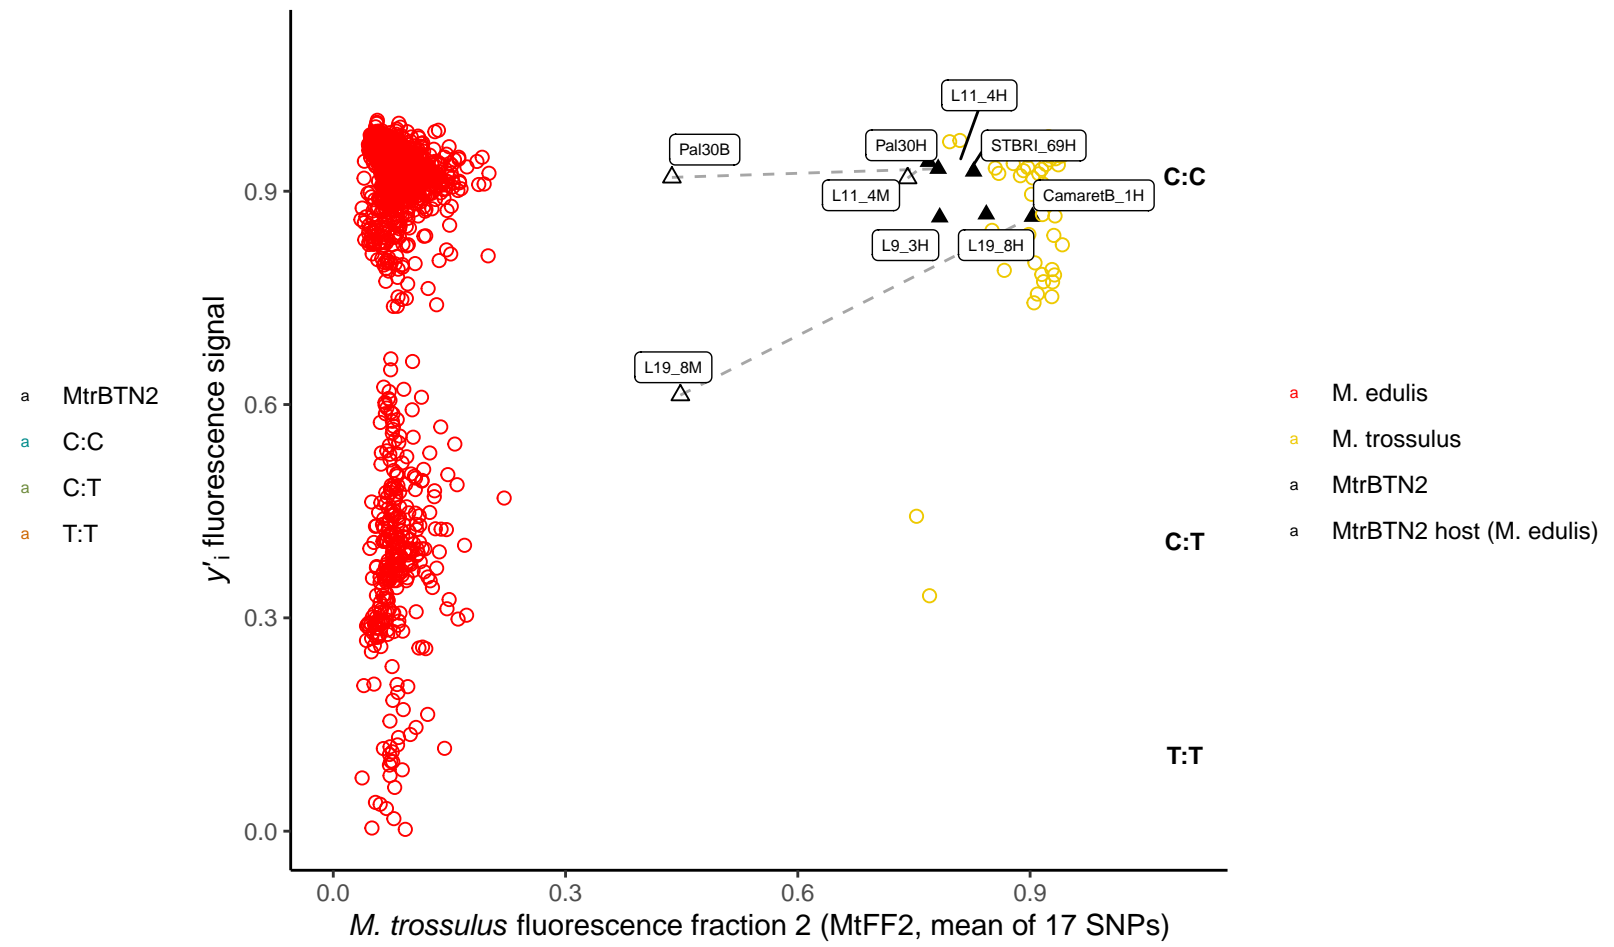

A) KASP fluorescence data plot: 098-gi\_238643554

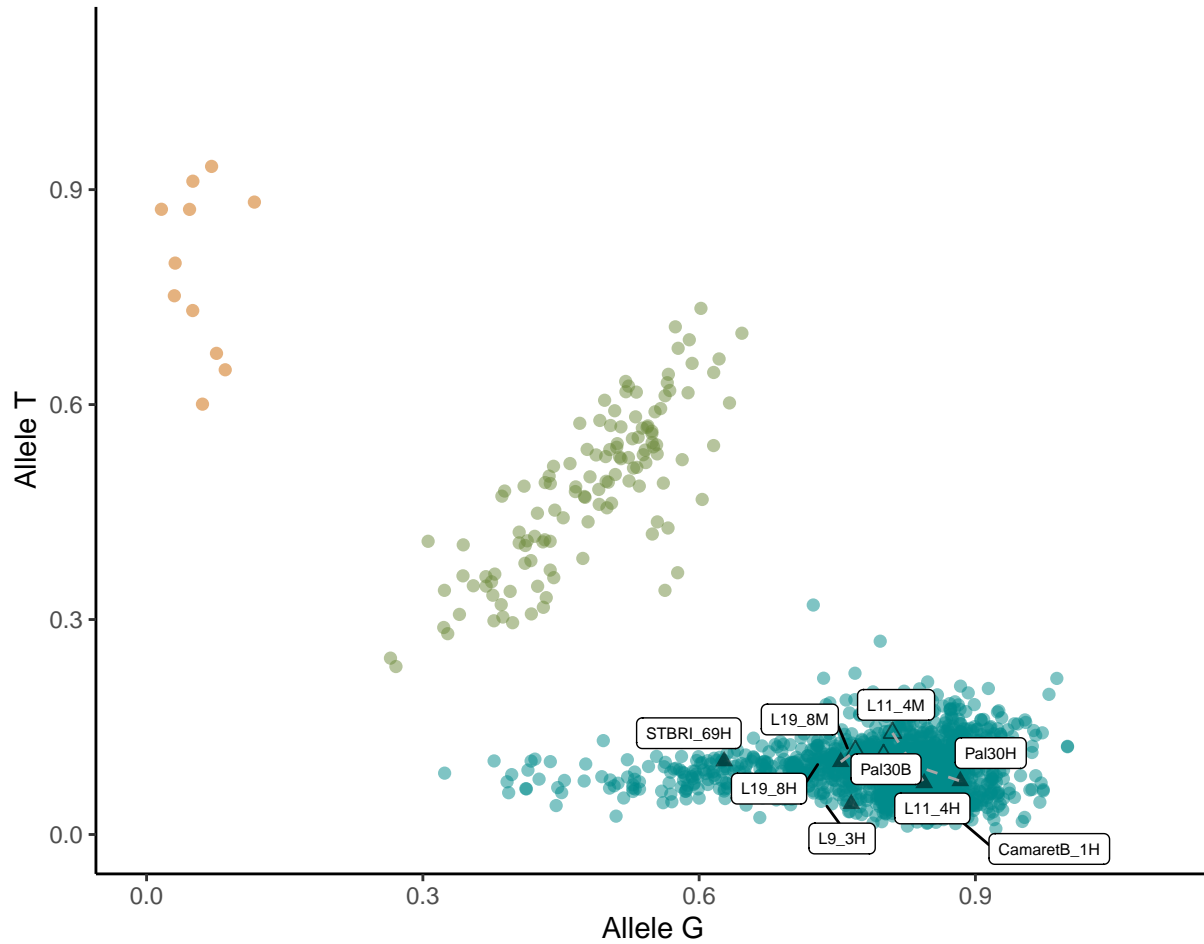

B) Correlation plot: 098-gi\_238643554

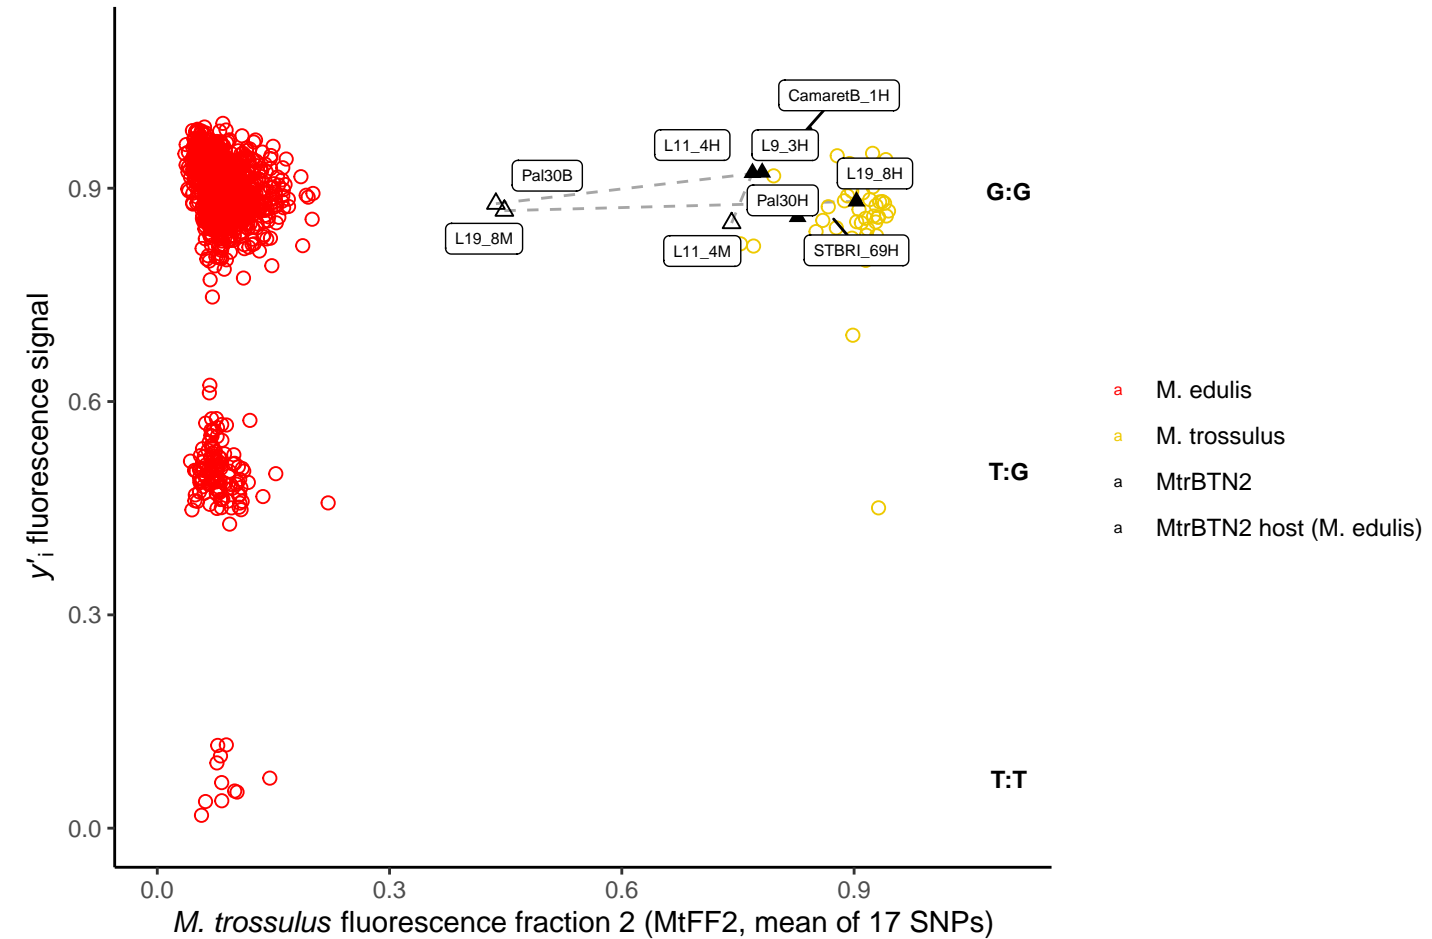

A) KASP fluorescence data plot: 071-C81364\_p839

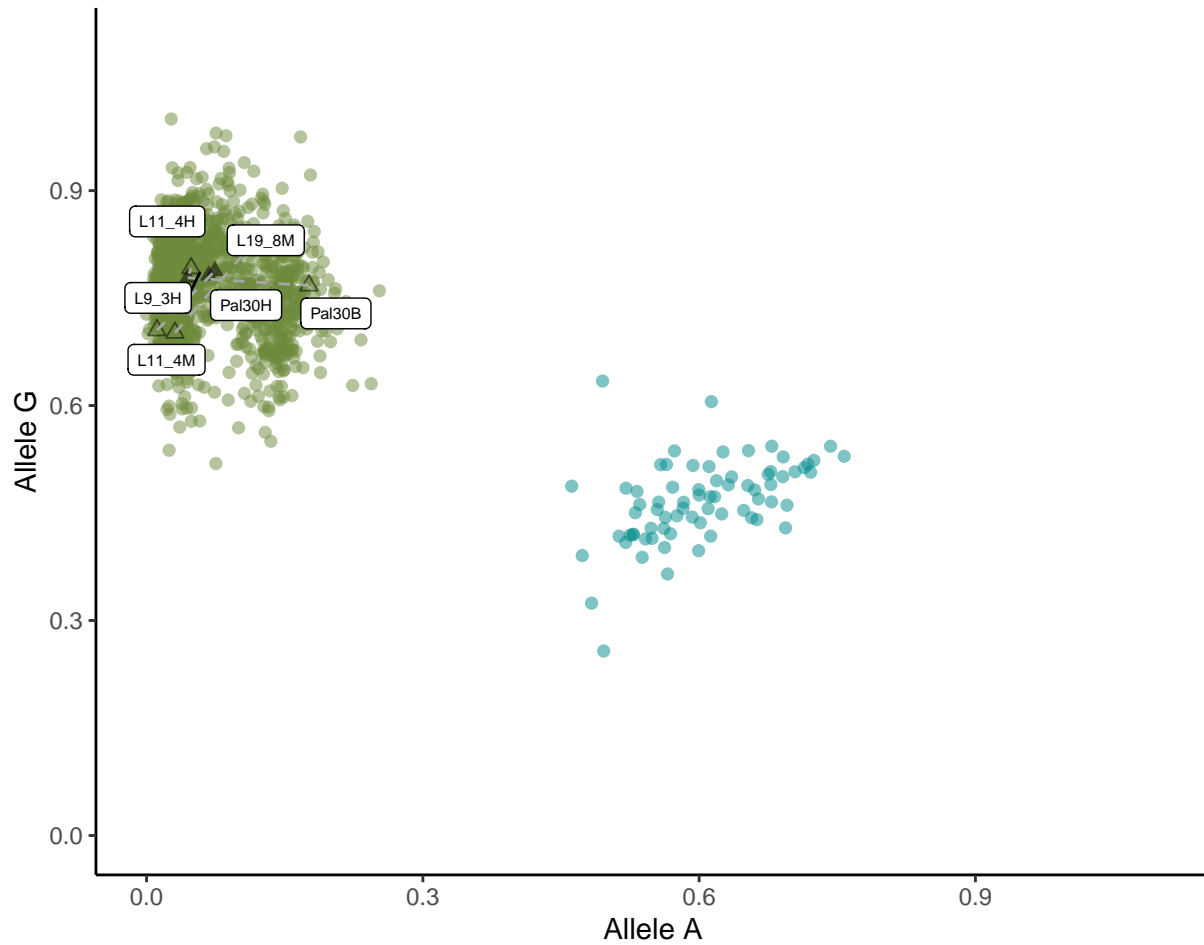

B) Correlation plot: 071-C81364\_p839

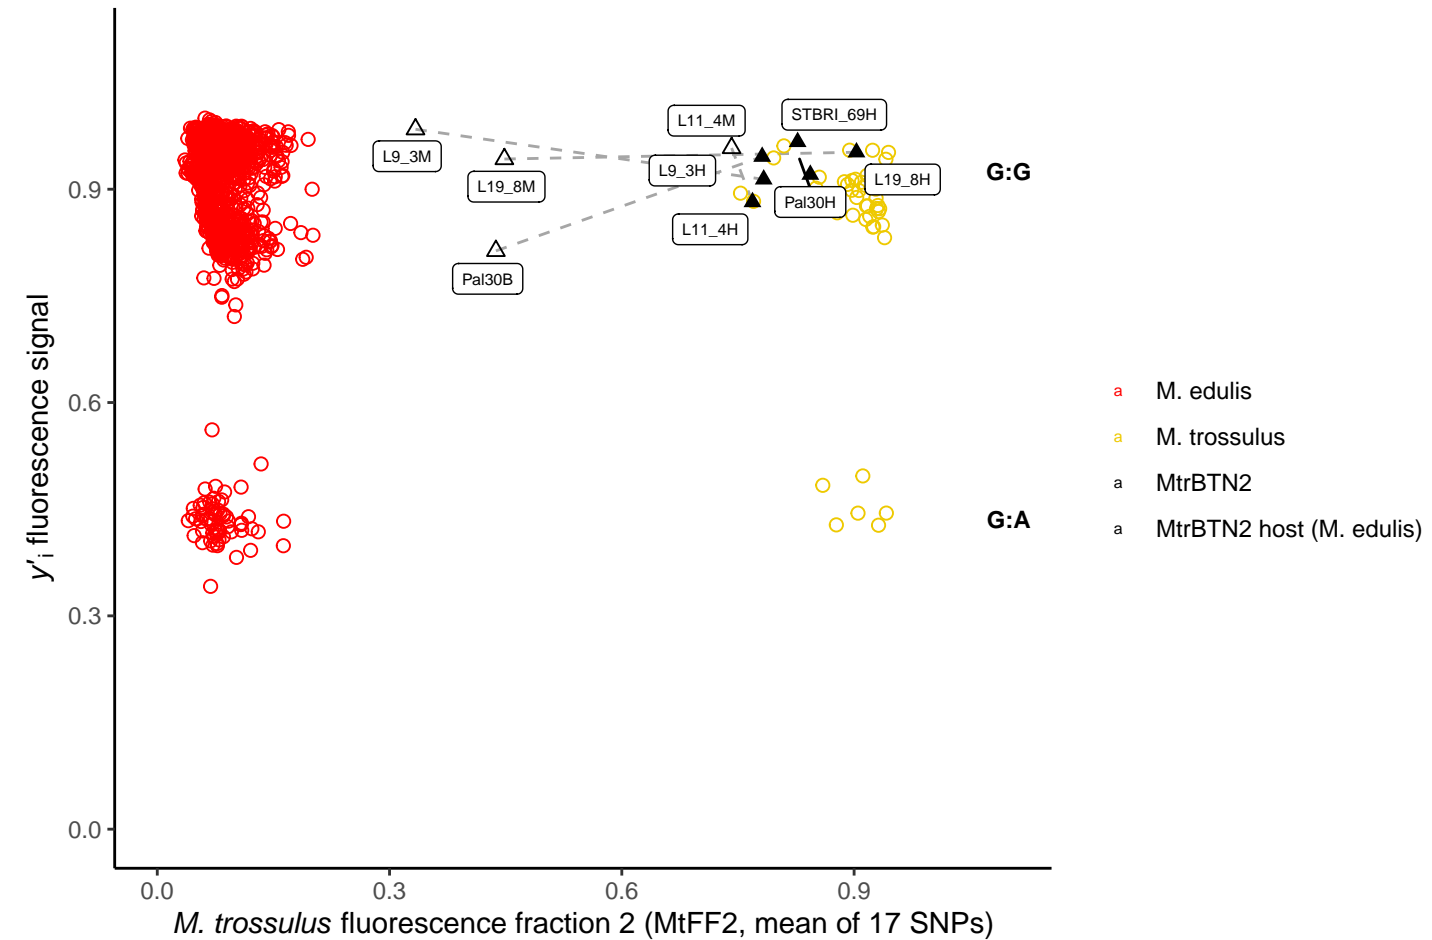

A) KASP fluorescence data plot: 009-C14115\_p131

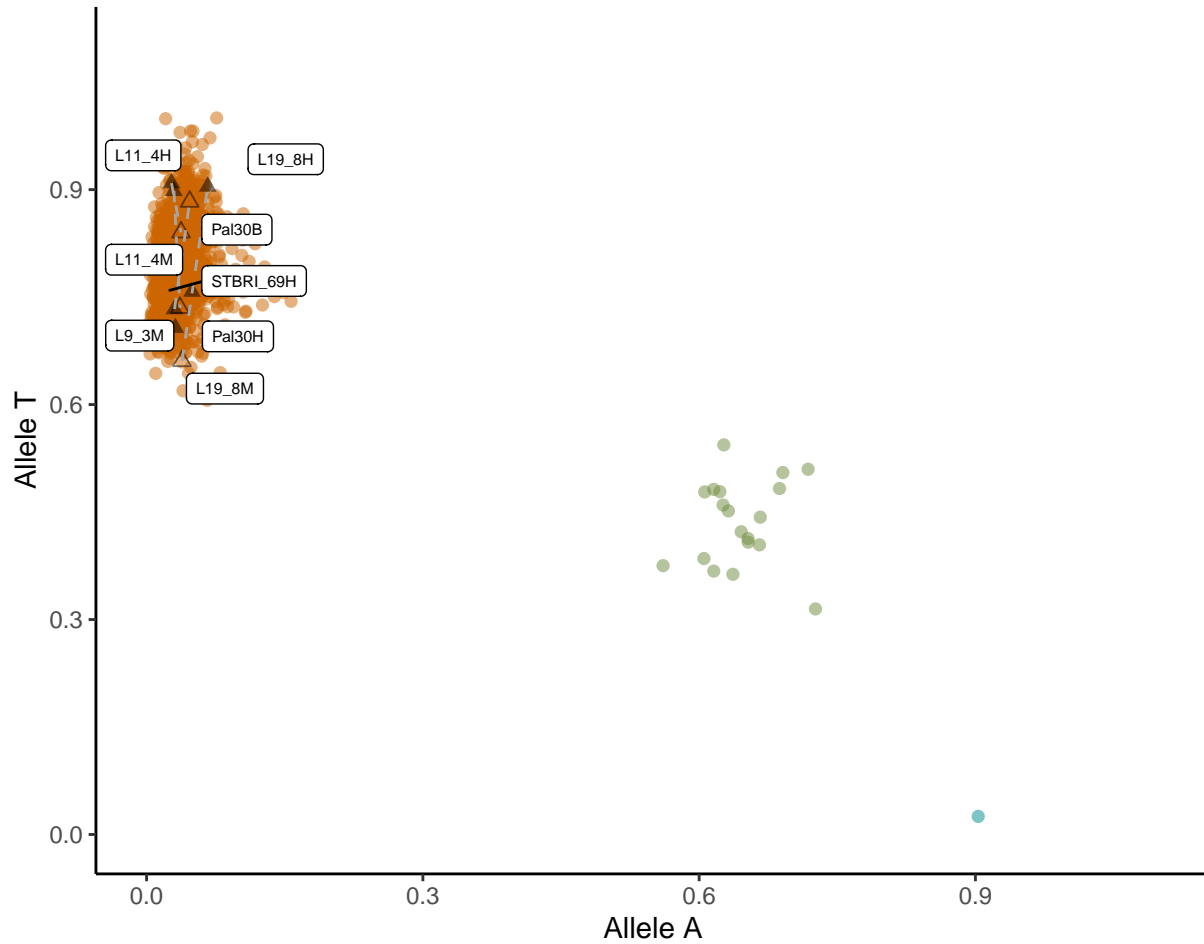

B) Correlation plot: 009-C14115\_p131

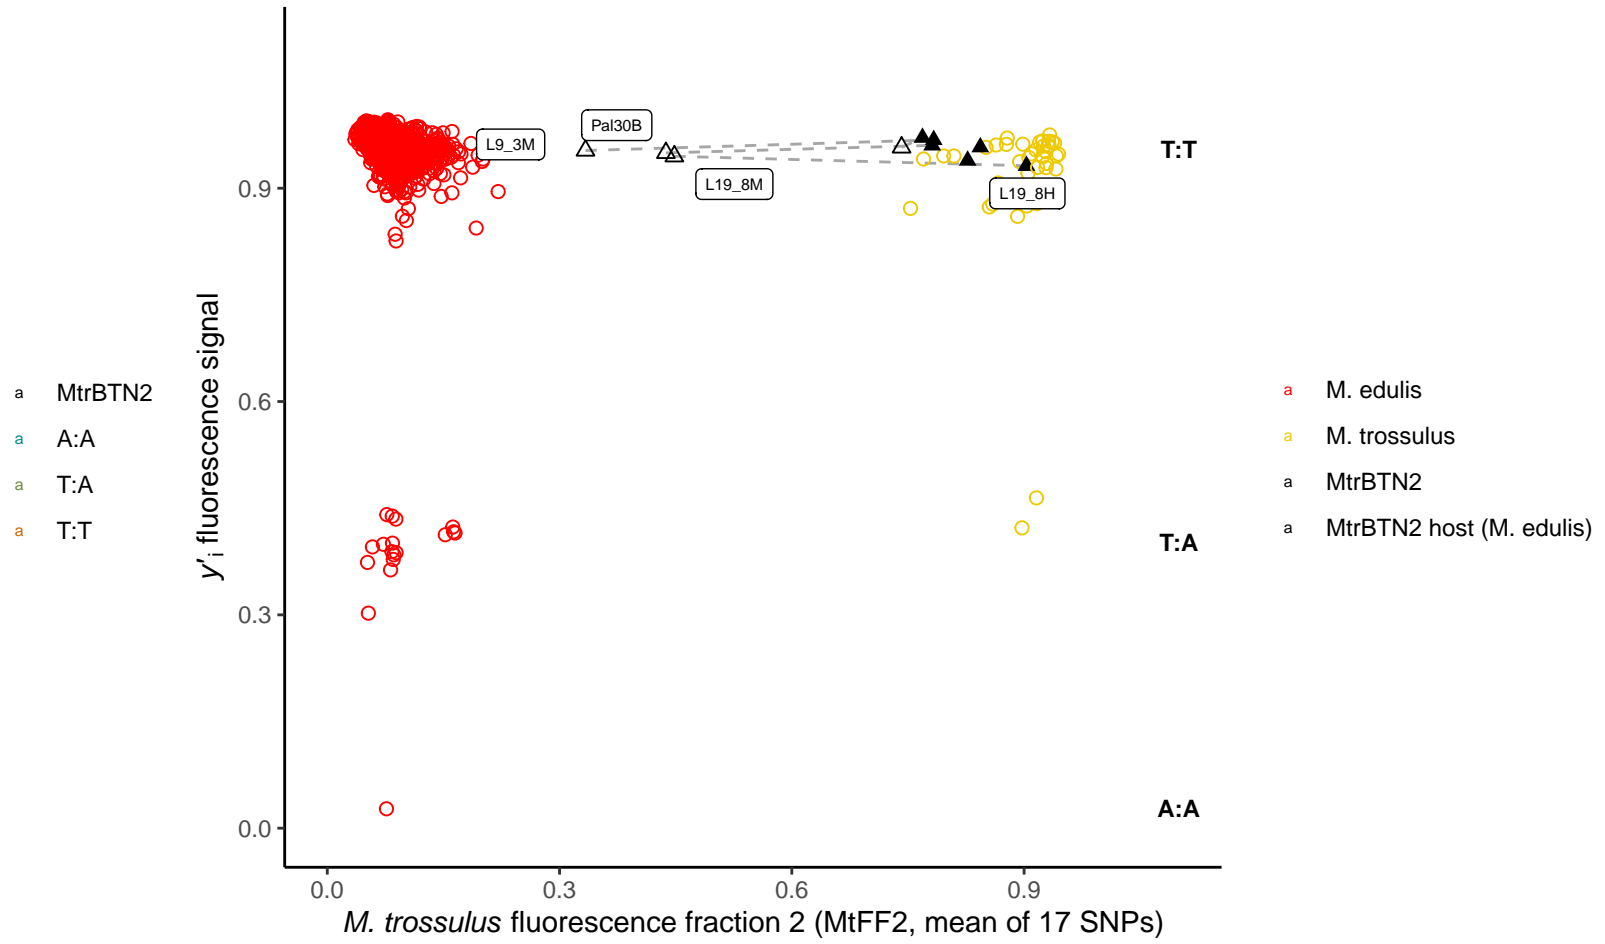

A) KASP fluorescence data plot: 409-gi\_223026752

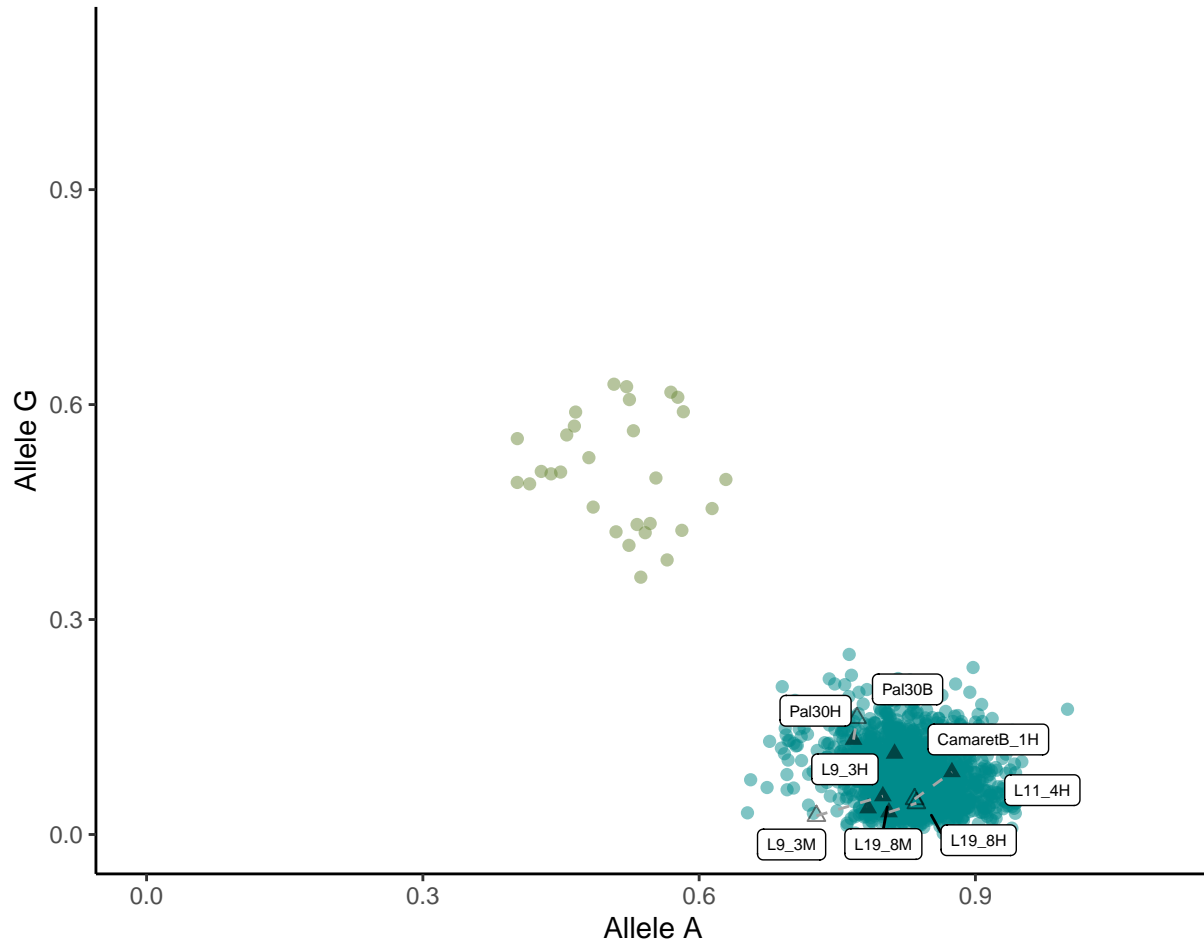

B) Correlation plot: 409-gi\_223026752

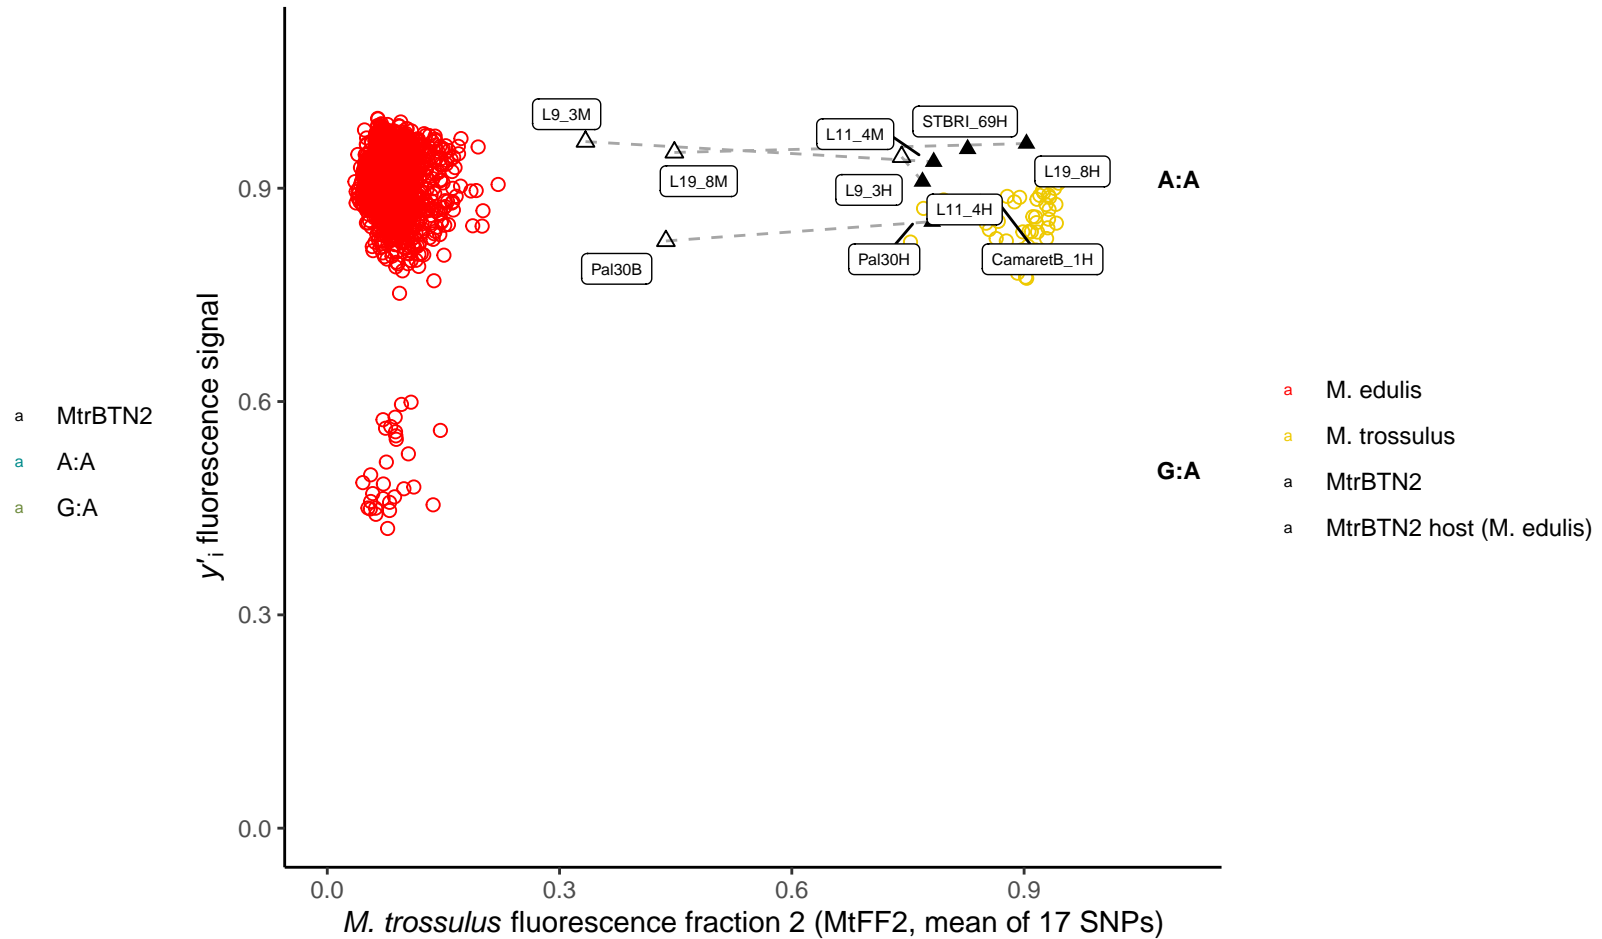

A) KASP fluorescence data plot: 429-gi\_261362848\_gb\_Contig28358\_p4108

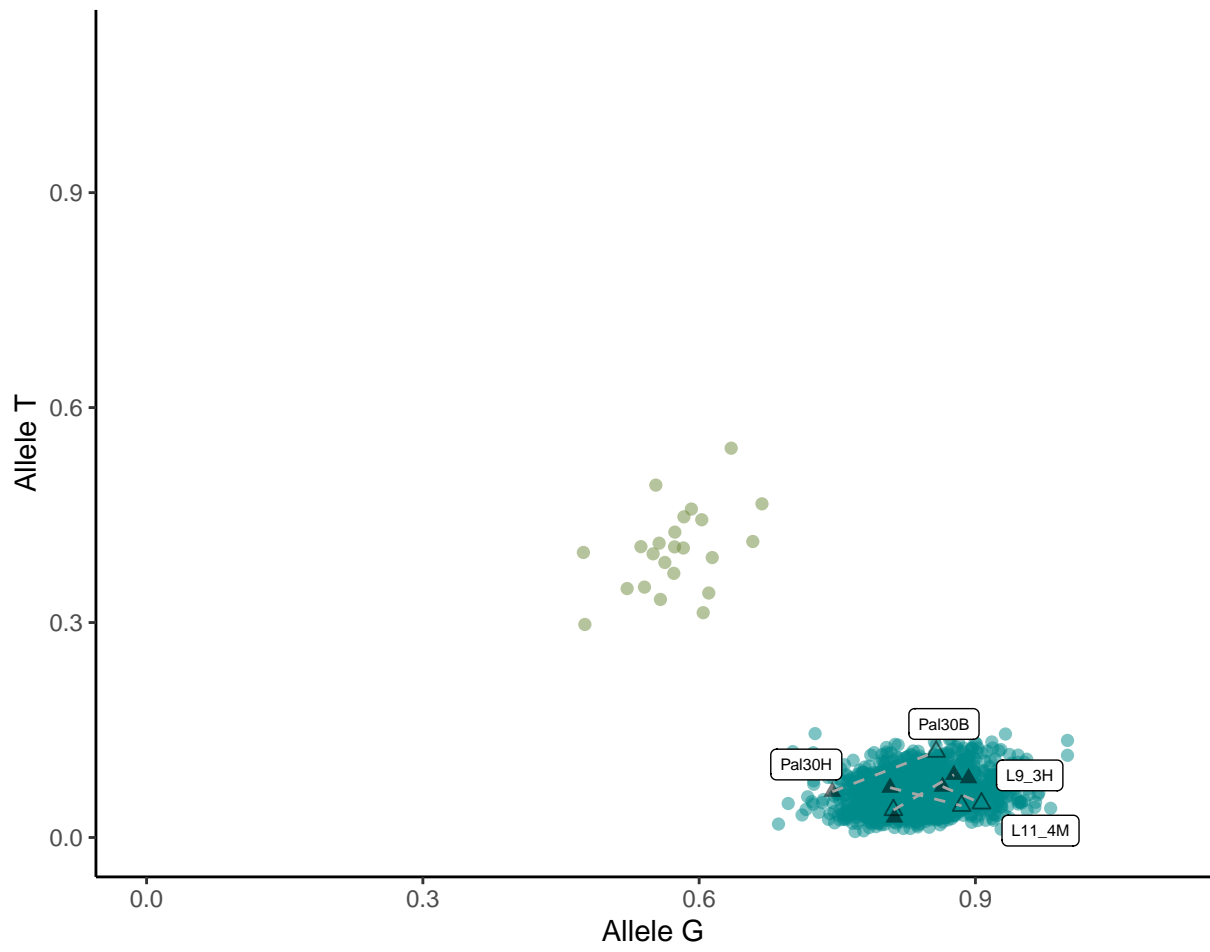

a MtrBTN2  
 a G:G  
 a T:G

B) Correlation plot: 429-gi\_261362848\_gb\_Contig28358\_p4108

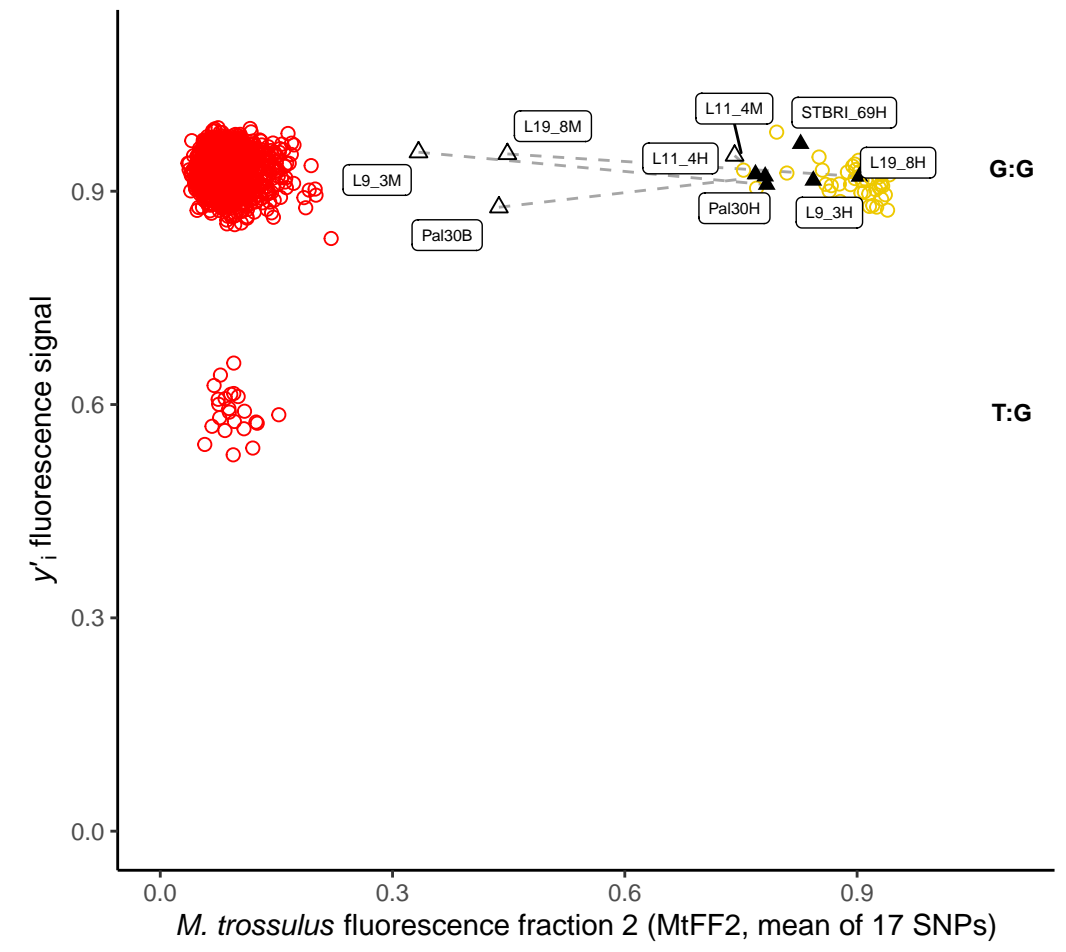

a *M. edulis*  
 a *M. trossulus*  
 a MtrBTN2  
 a MtrBTN2 host (*M. edulis*)

A) KASP fluorescence data plot: 036-C2959\_p251

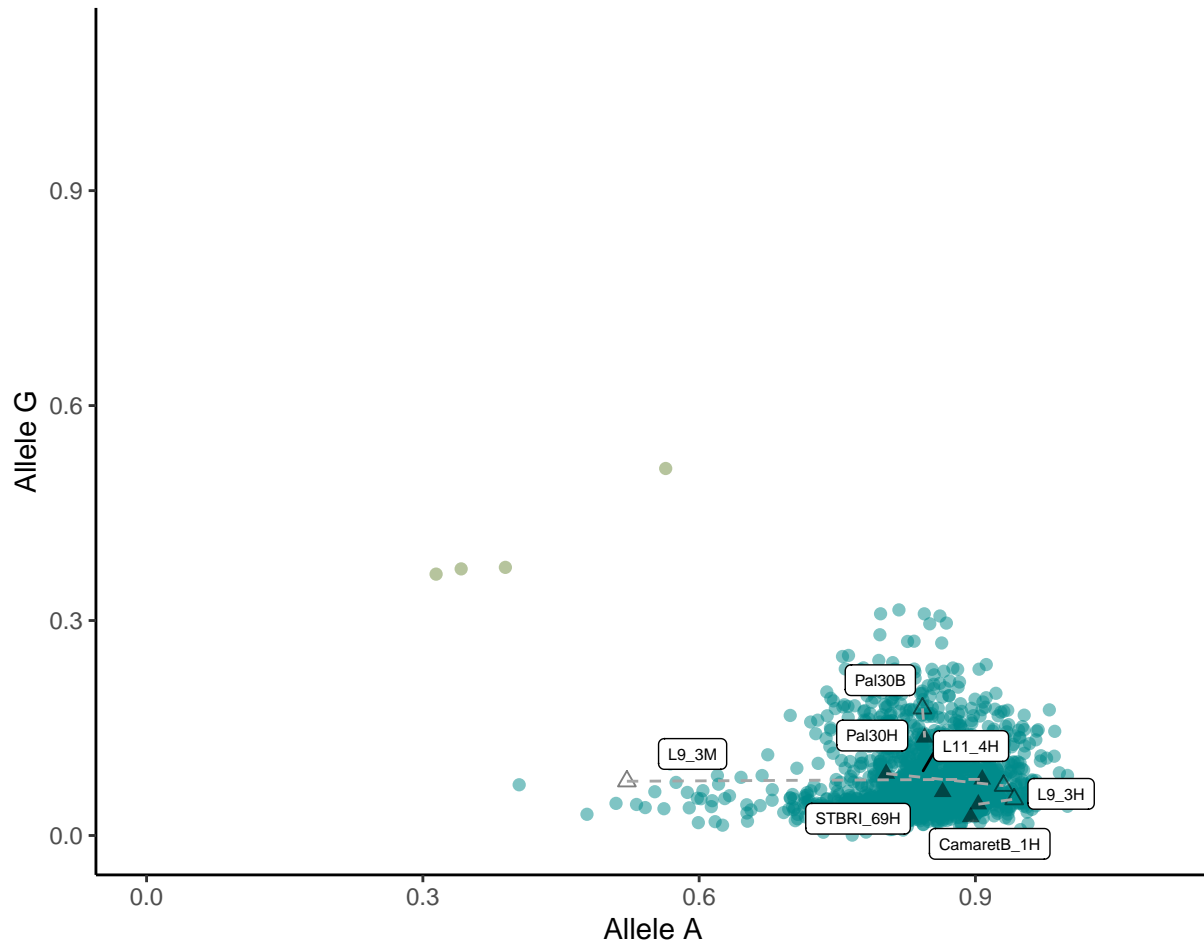

B) Correlation plot: 036-C2959\_p251

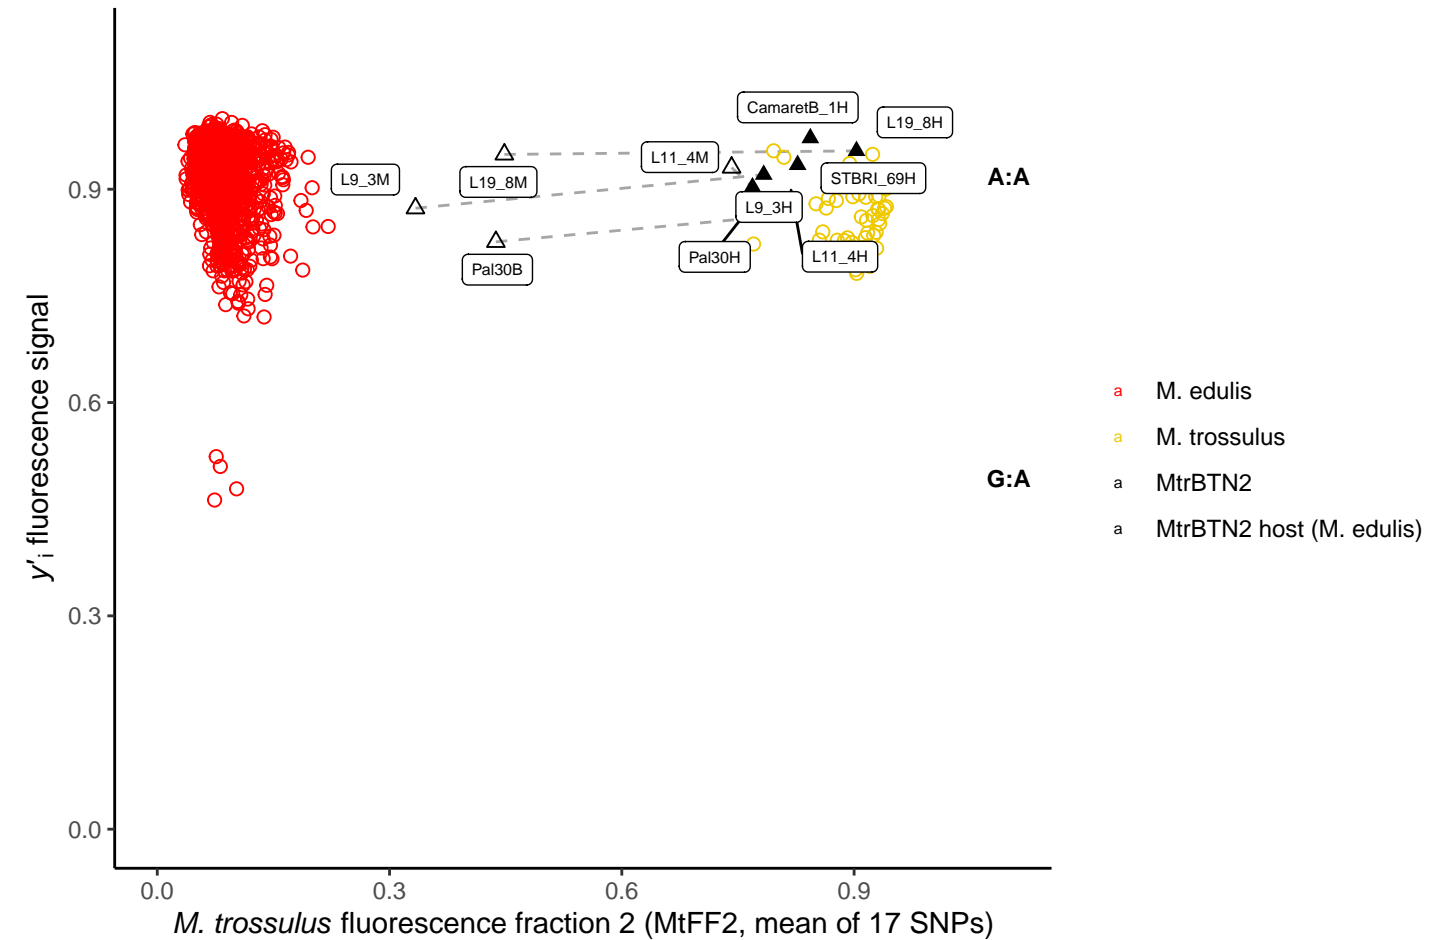



A) KASP fluorescence data plot: 045-C39969\_p416

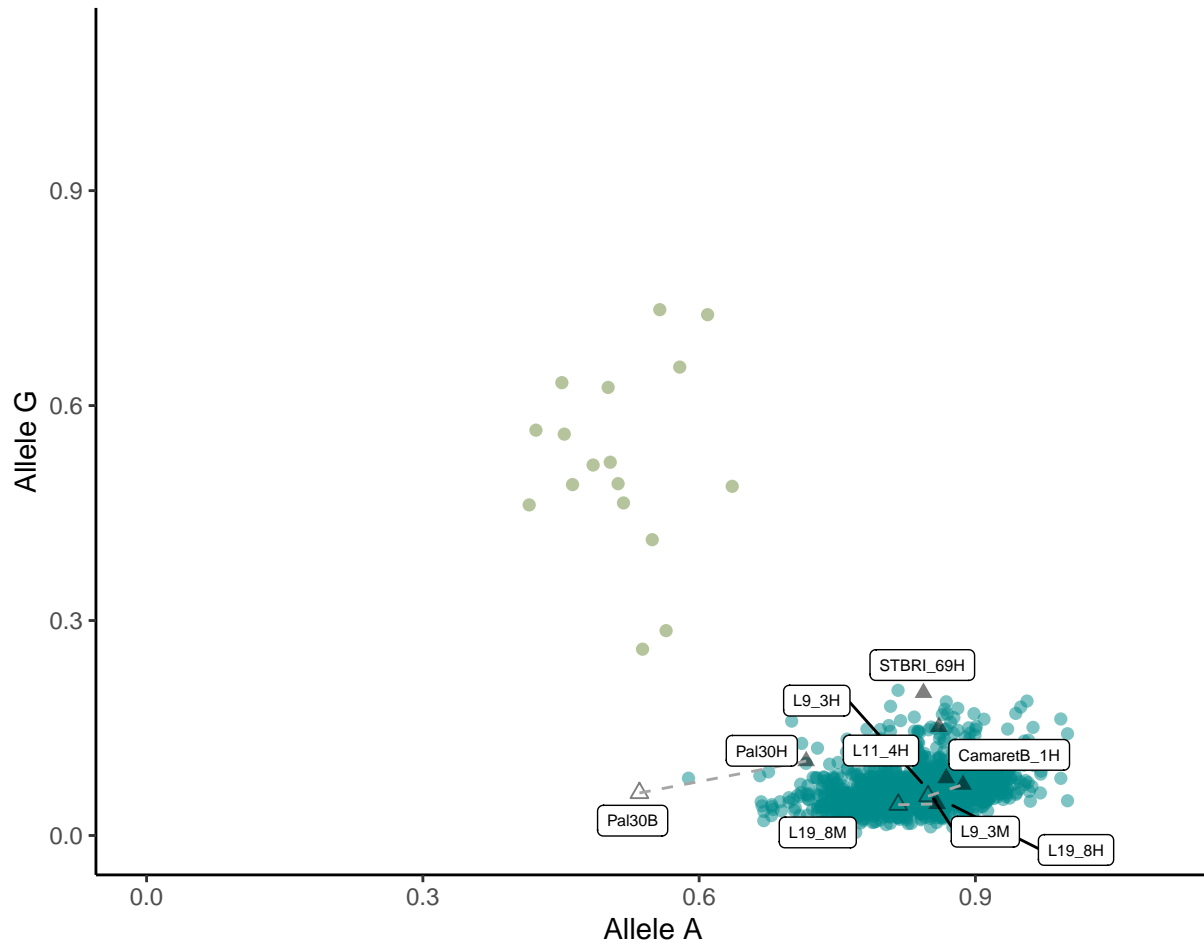

B) Correlation plot: 045-C39969\_p416

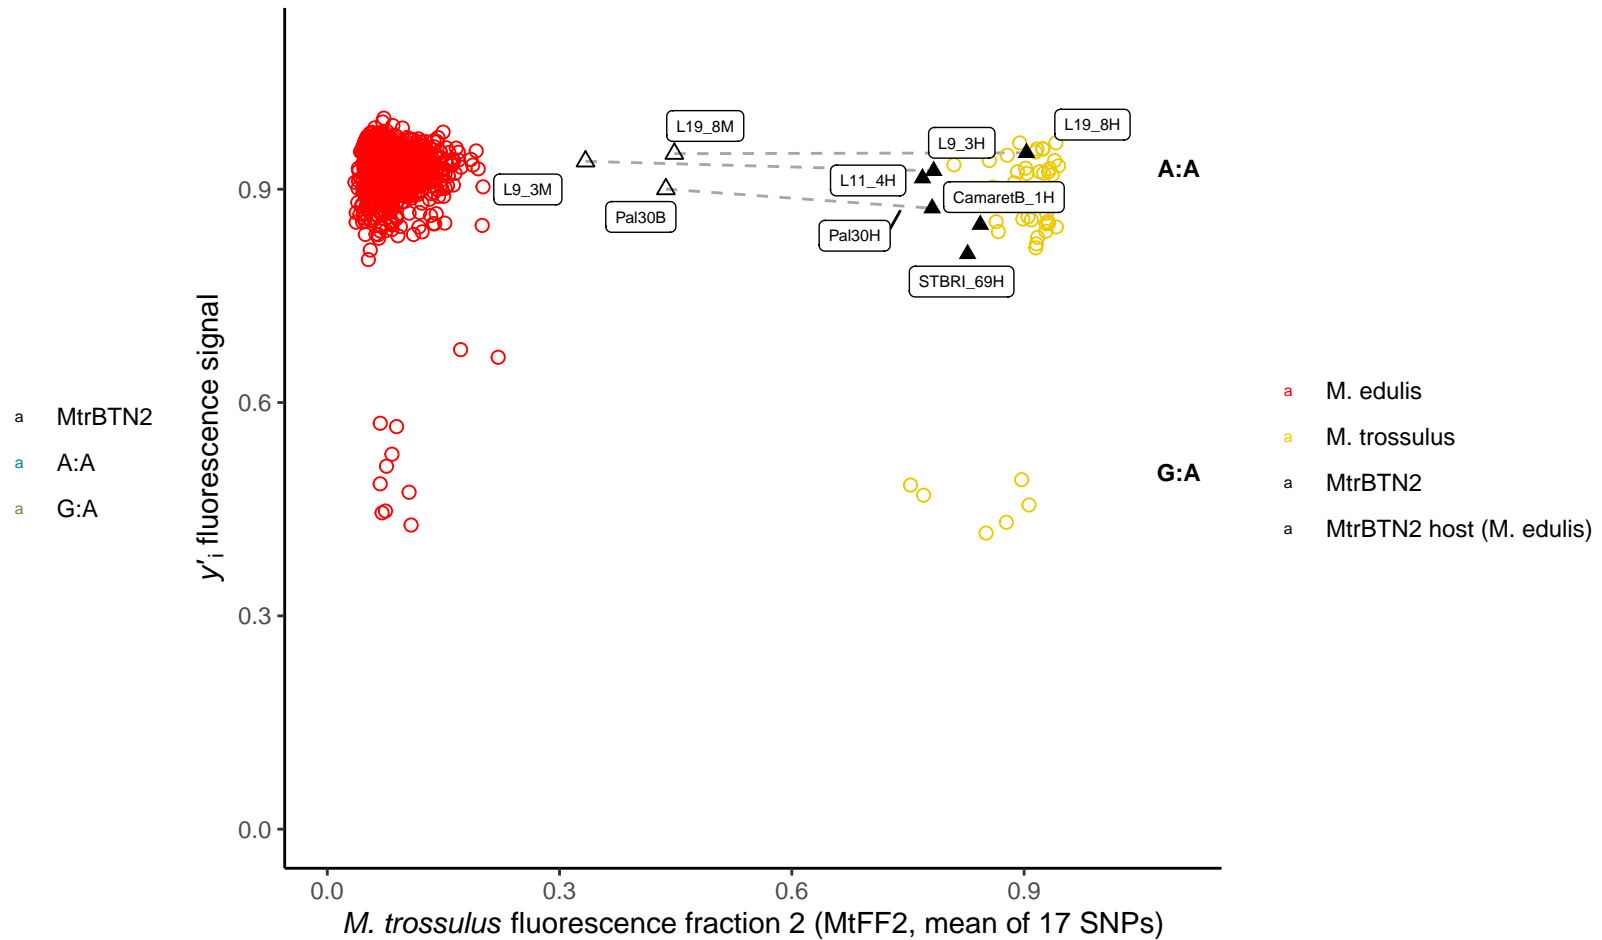

A) KASP fluorescence data plot: 082-C9777\_p612

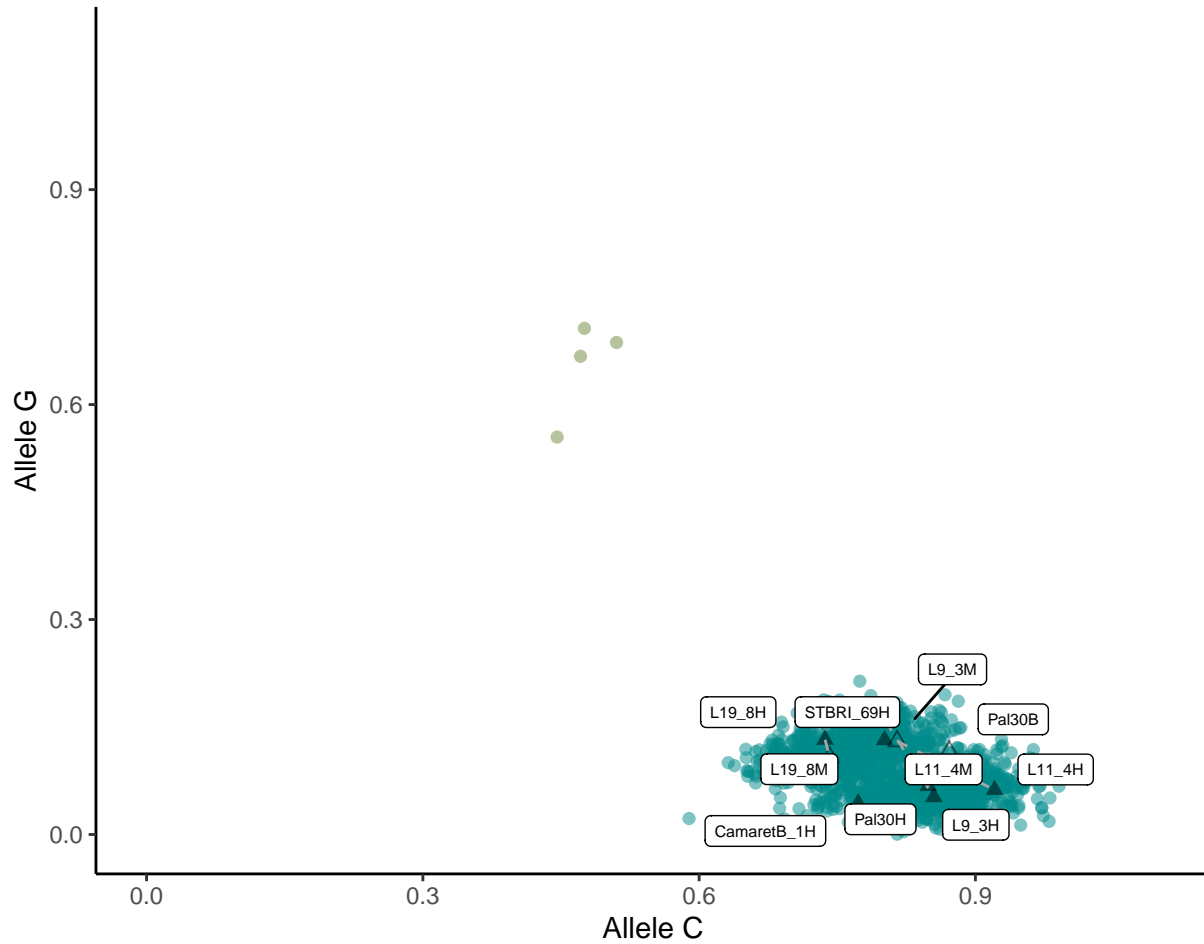

B) Correlation plot: 082-C9777\_p612

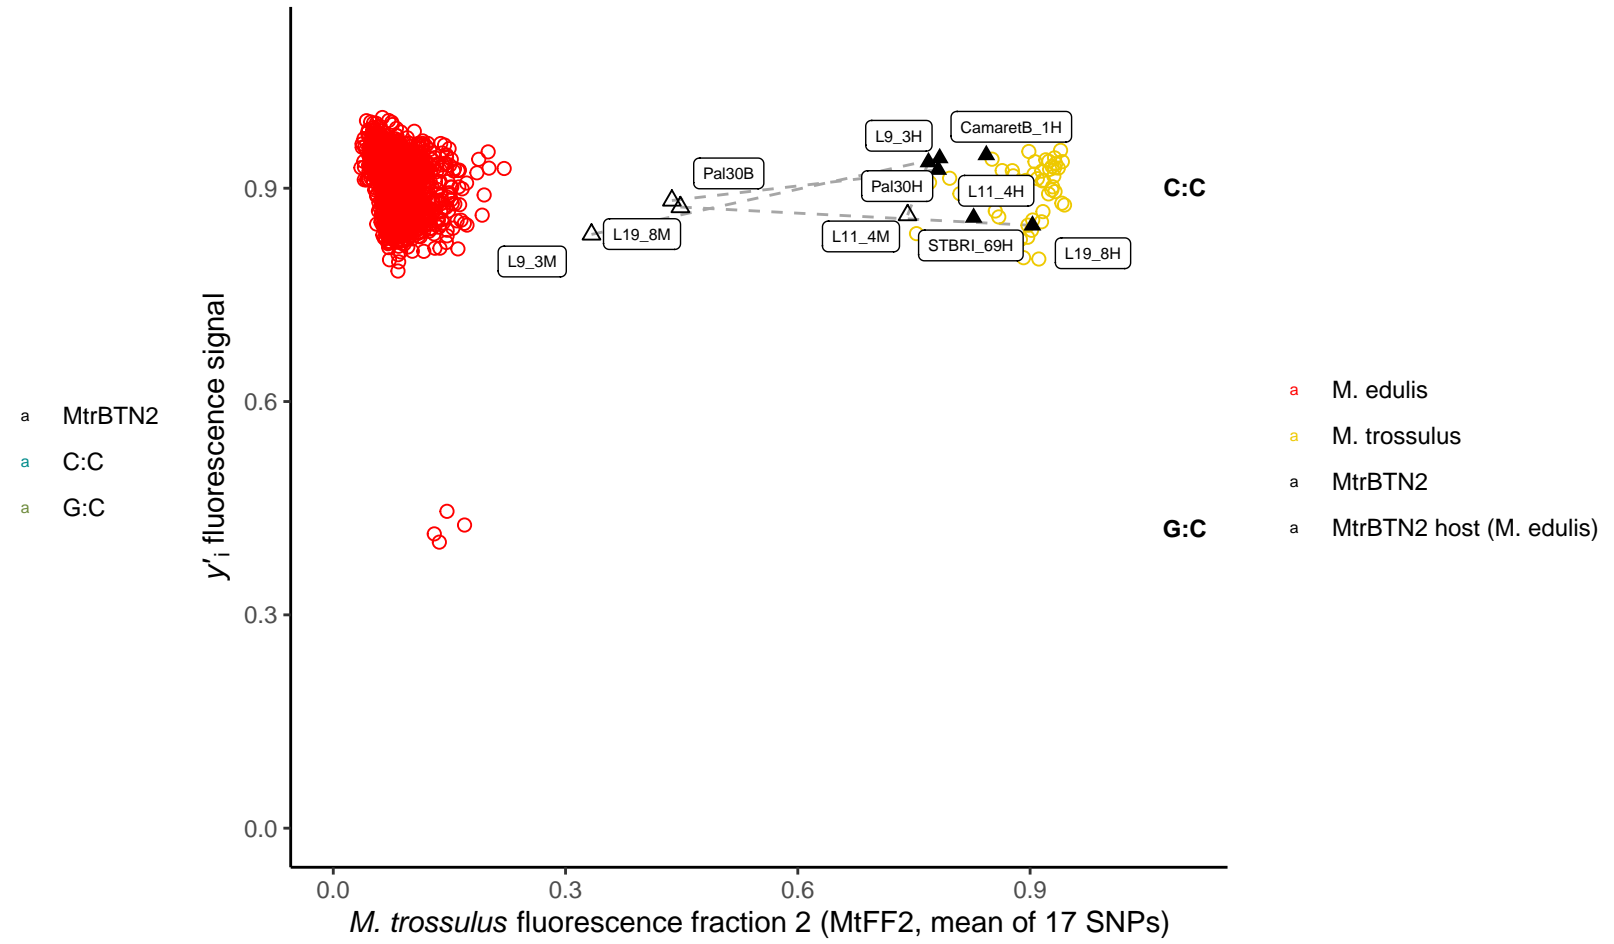

A) KASP fluorescence data plot: 174-H\_L1\_soap\_Contig1865\_pos4732\_Edu\_EU\_US

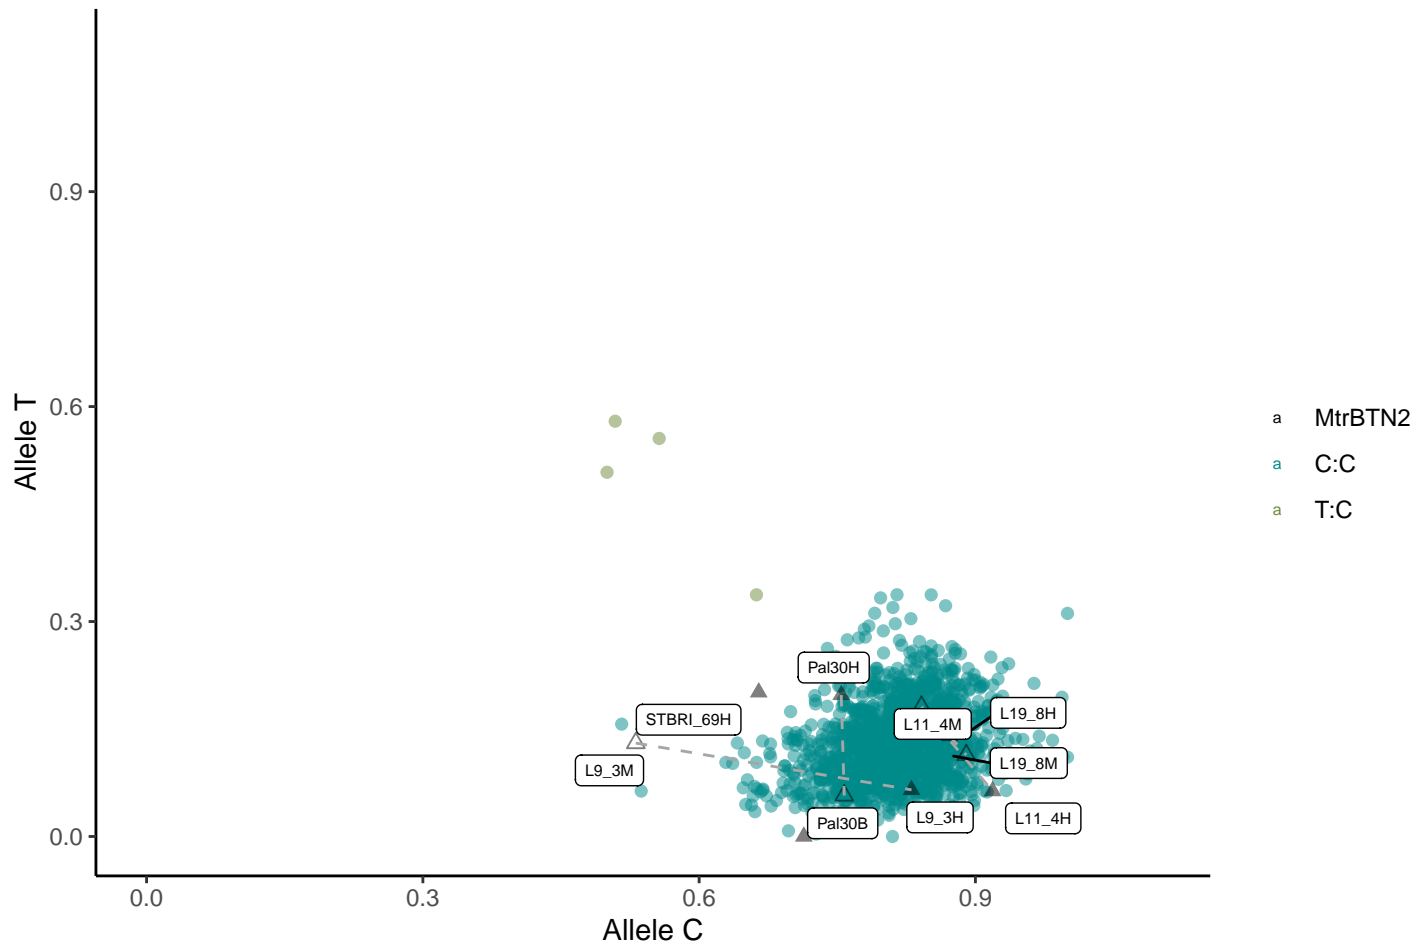

B) Correlation plot: 174-H\_L1\_soap\_Contig1865\_pos4732\_Edu\_EU\_US

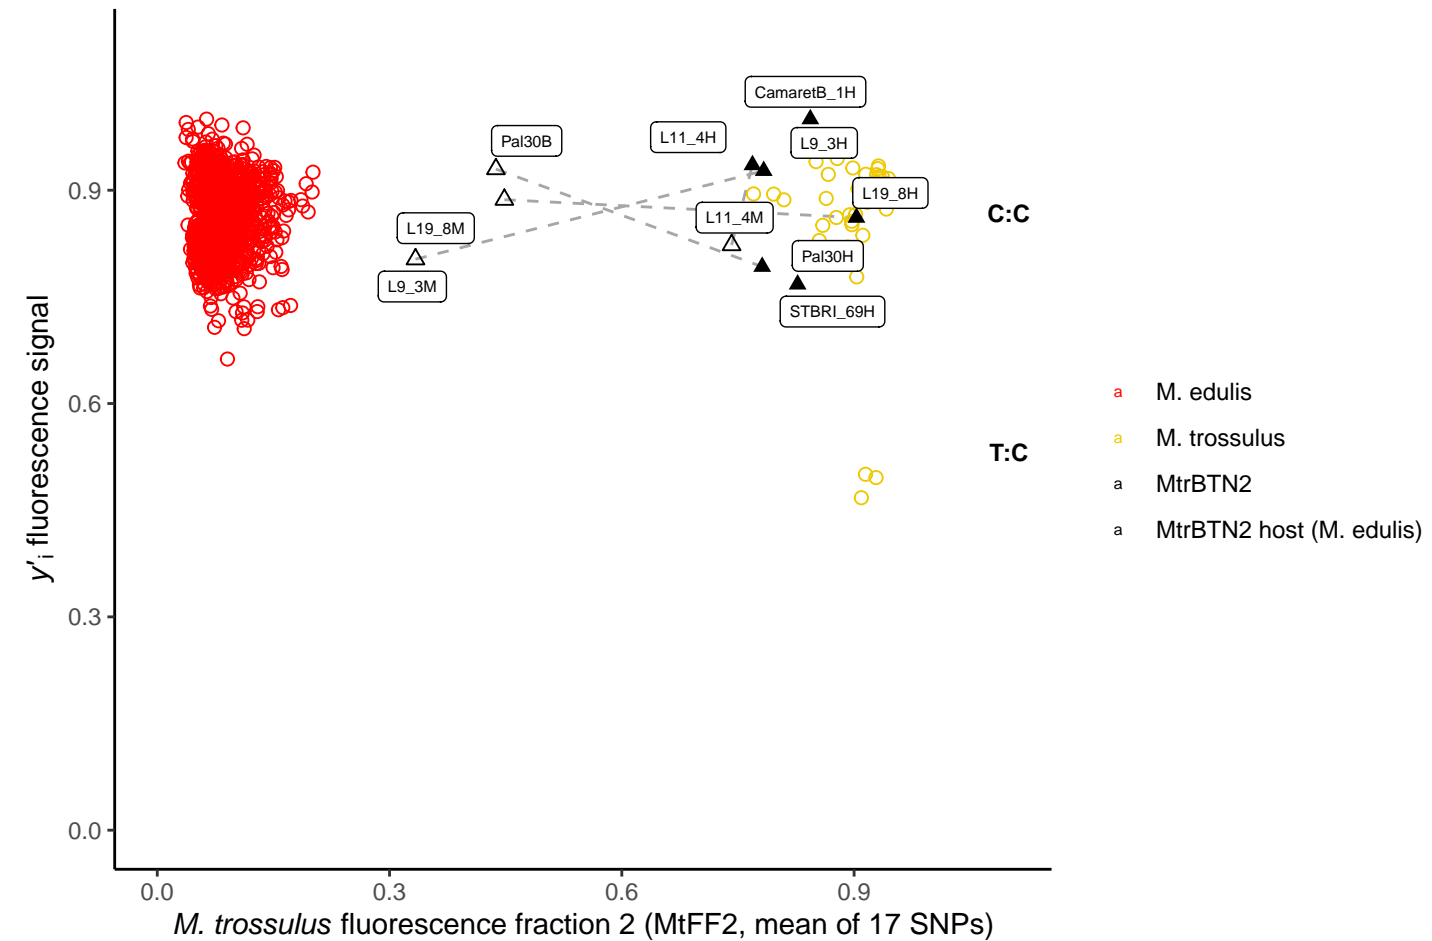

A) KASP fluorescence data plot: 210-R\_L21\_newbler\_C1

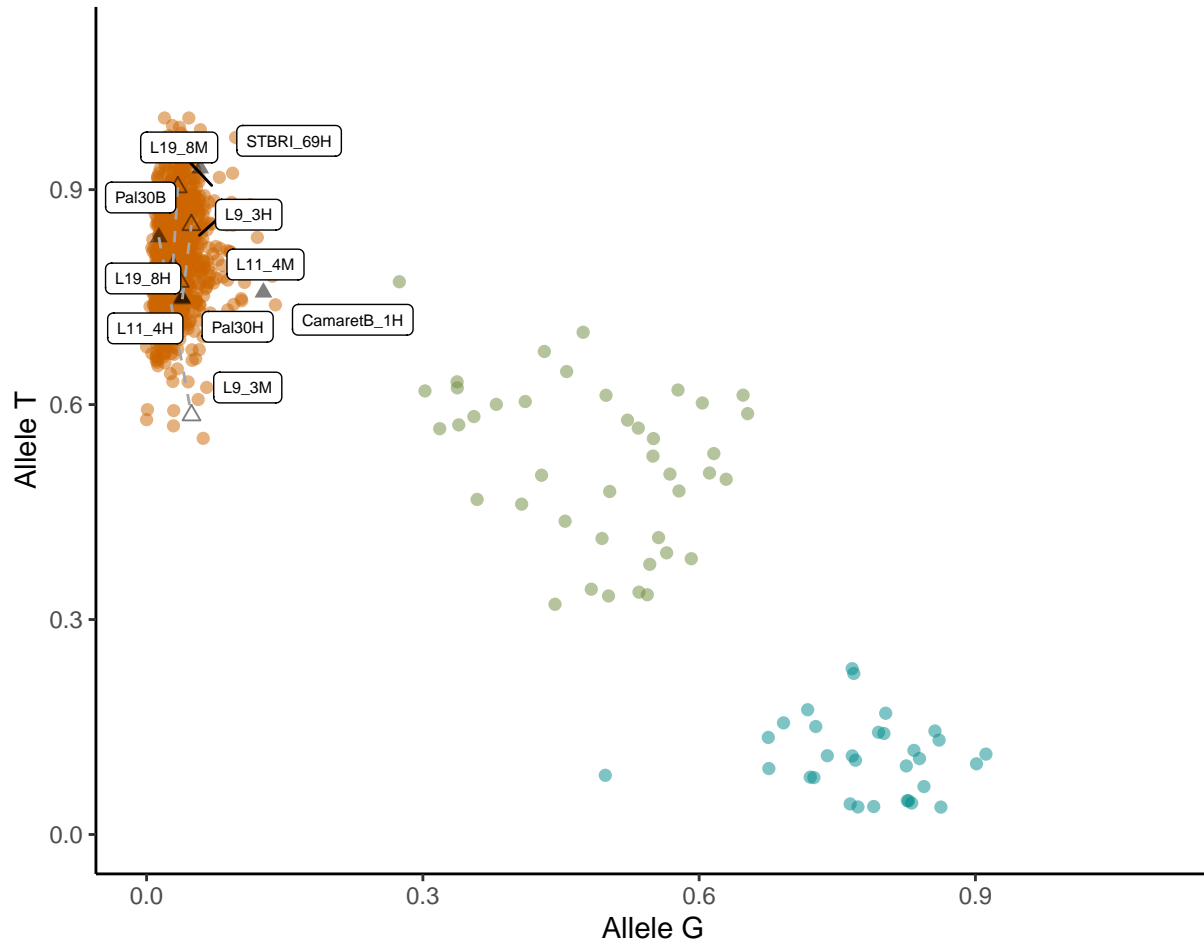

B) Correlation plot: 210-R\_L21\_newbler\_C1

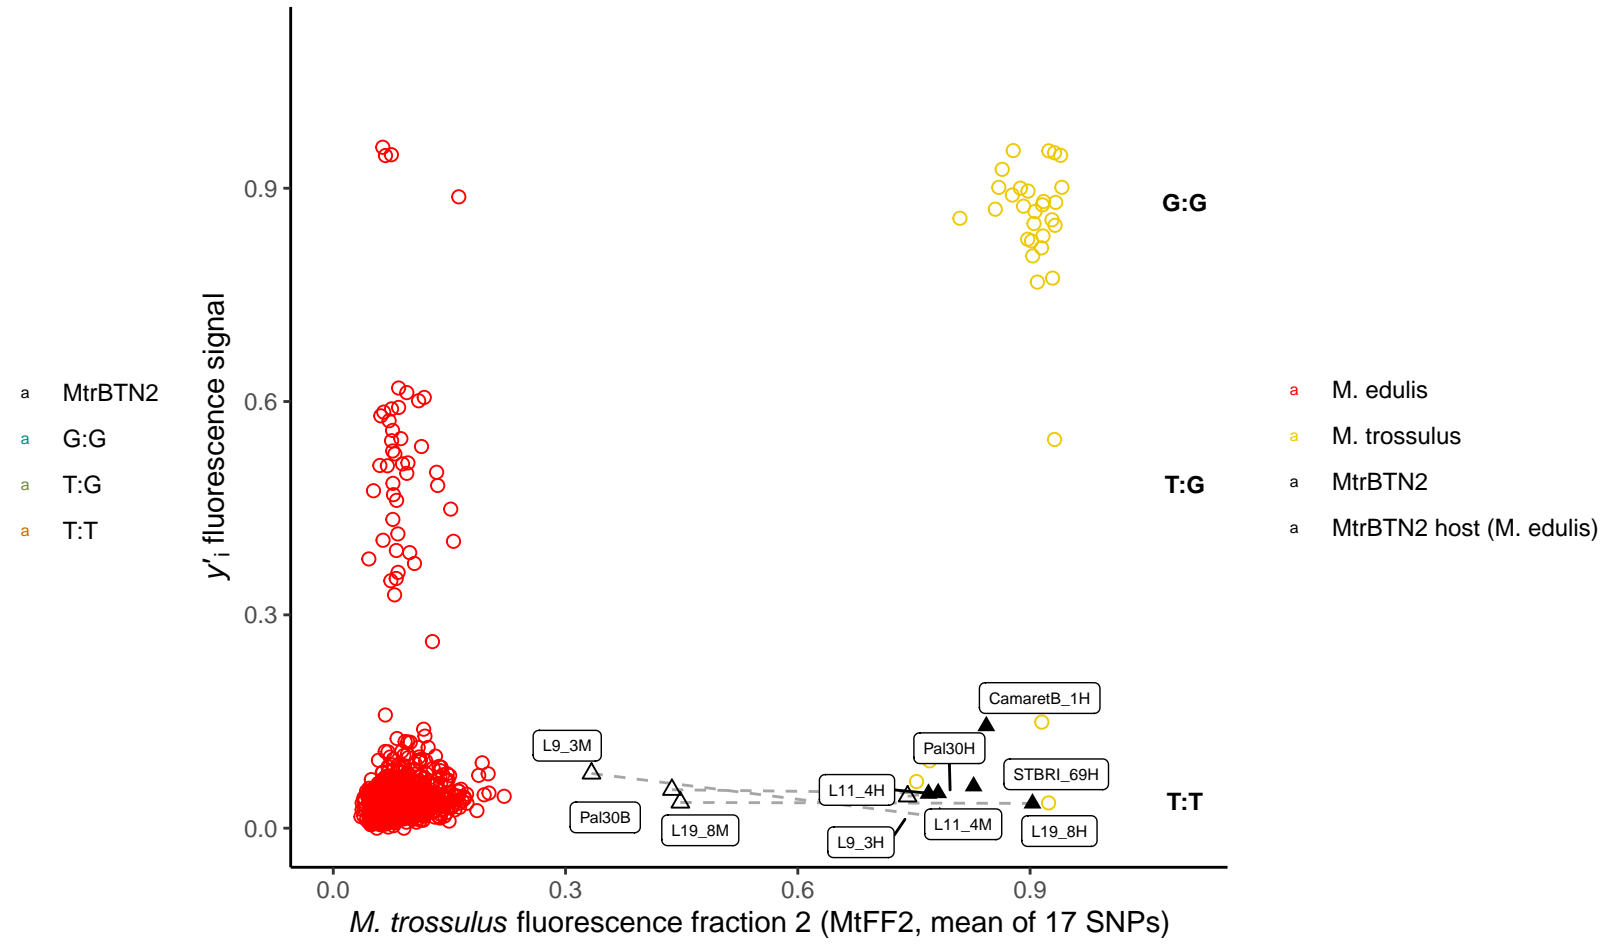

A) KASP fluorescence data plot: 085-gi\_212815835

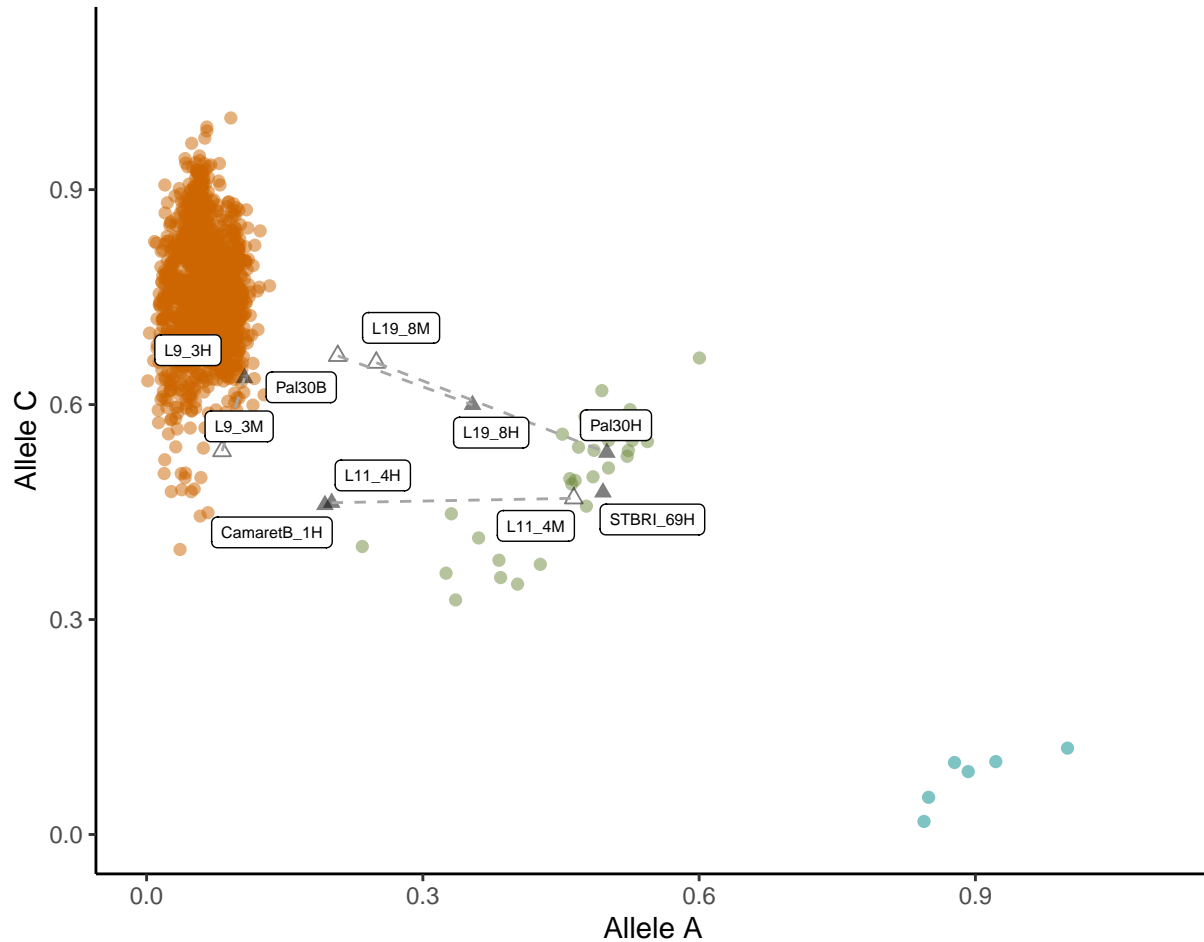

B) Correlation plot: 085-gi\_212815835

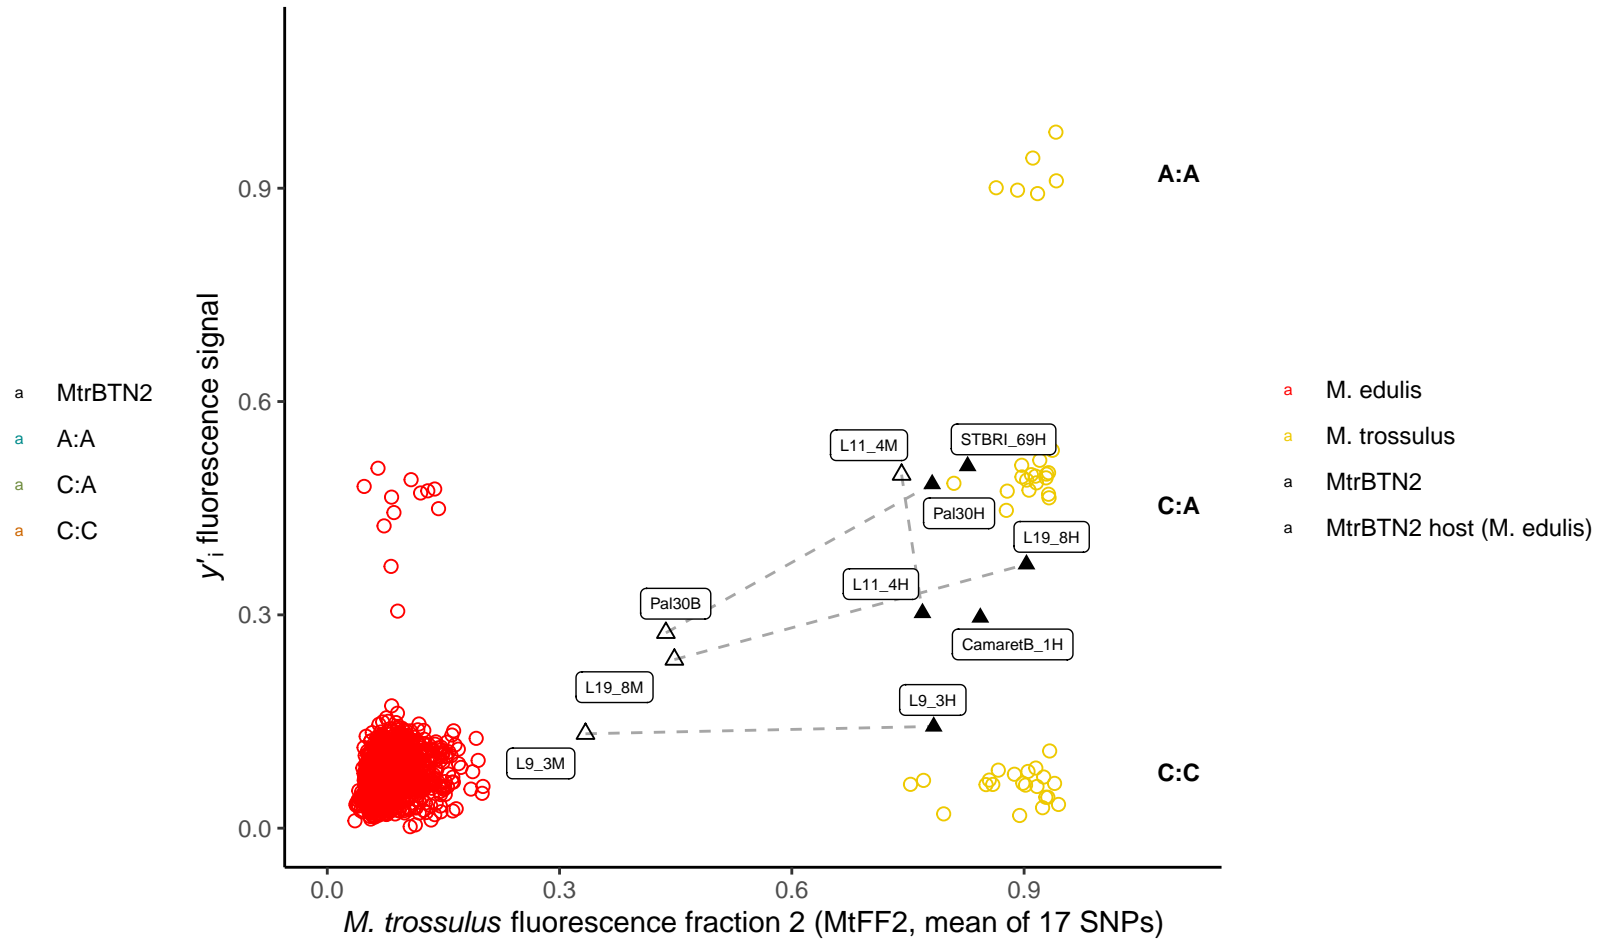

A) KASP fluorescence data plot: 038-Contig31315\_pos1274\_Edu\_EU\_US

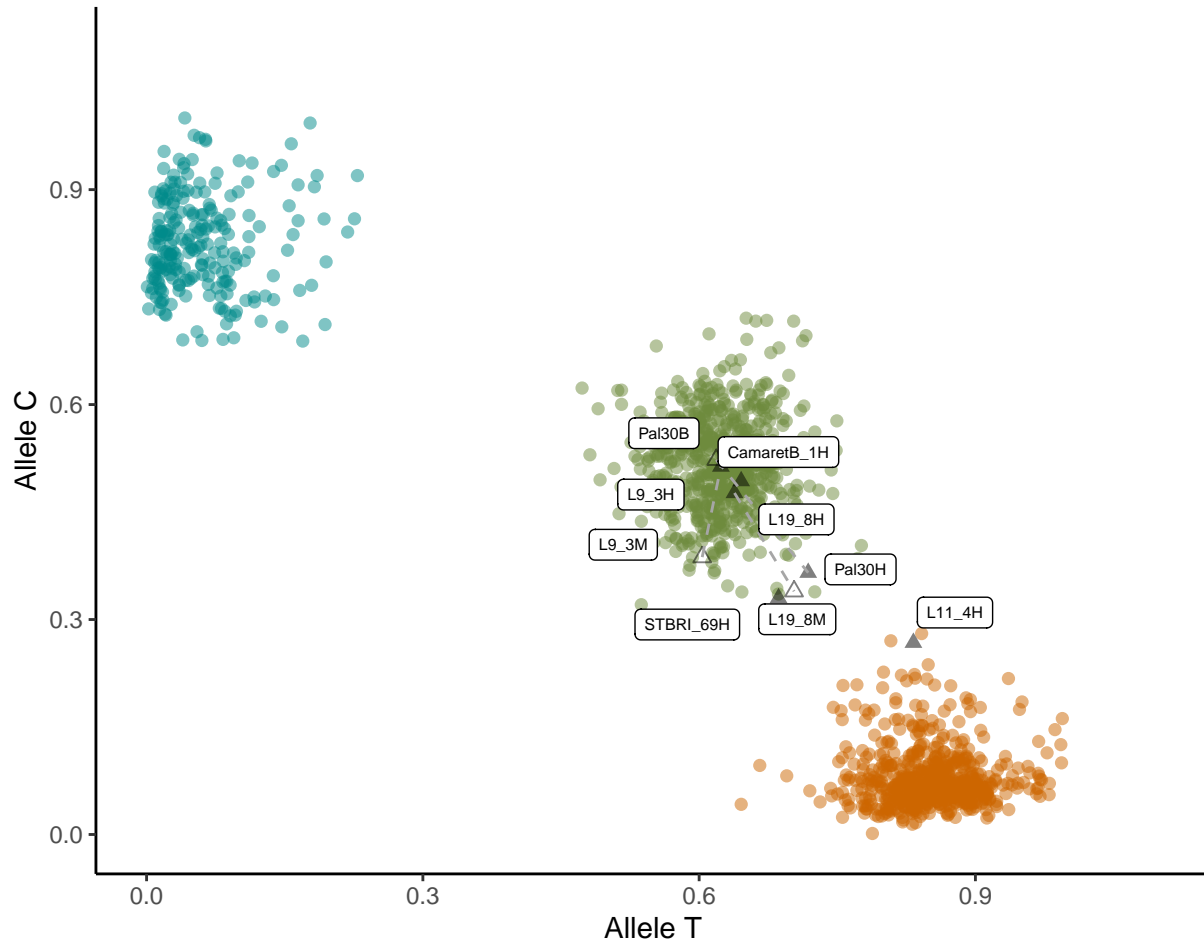

B) Correlation plot: 038-Contig31315\_pos1274\_Edu\_EU\_US

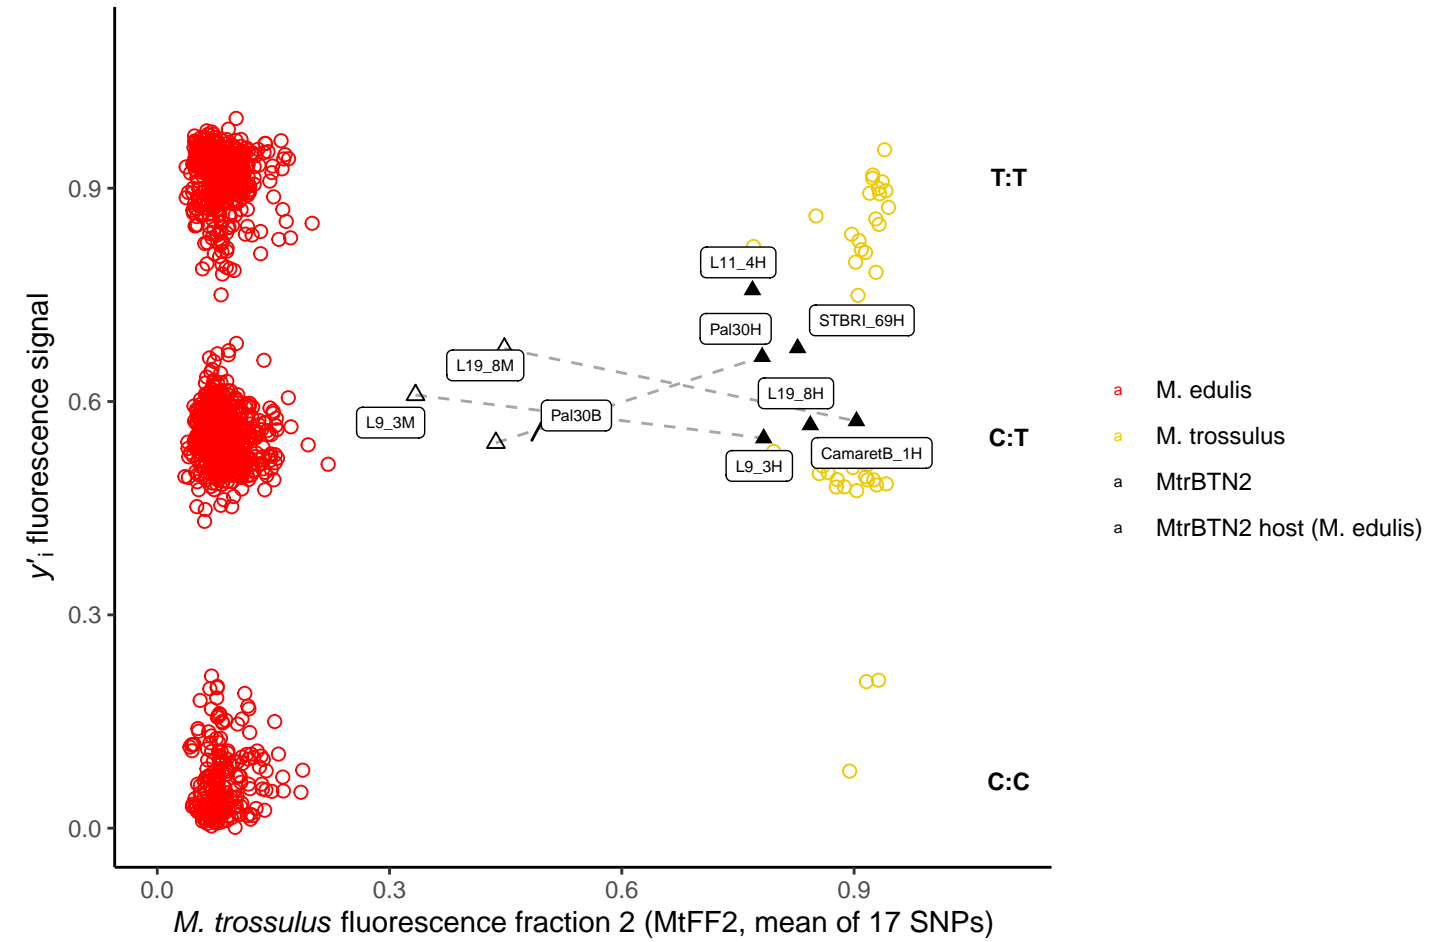

A) KASP fluorescence data plot: 043-C3749\_p849

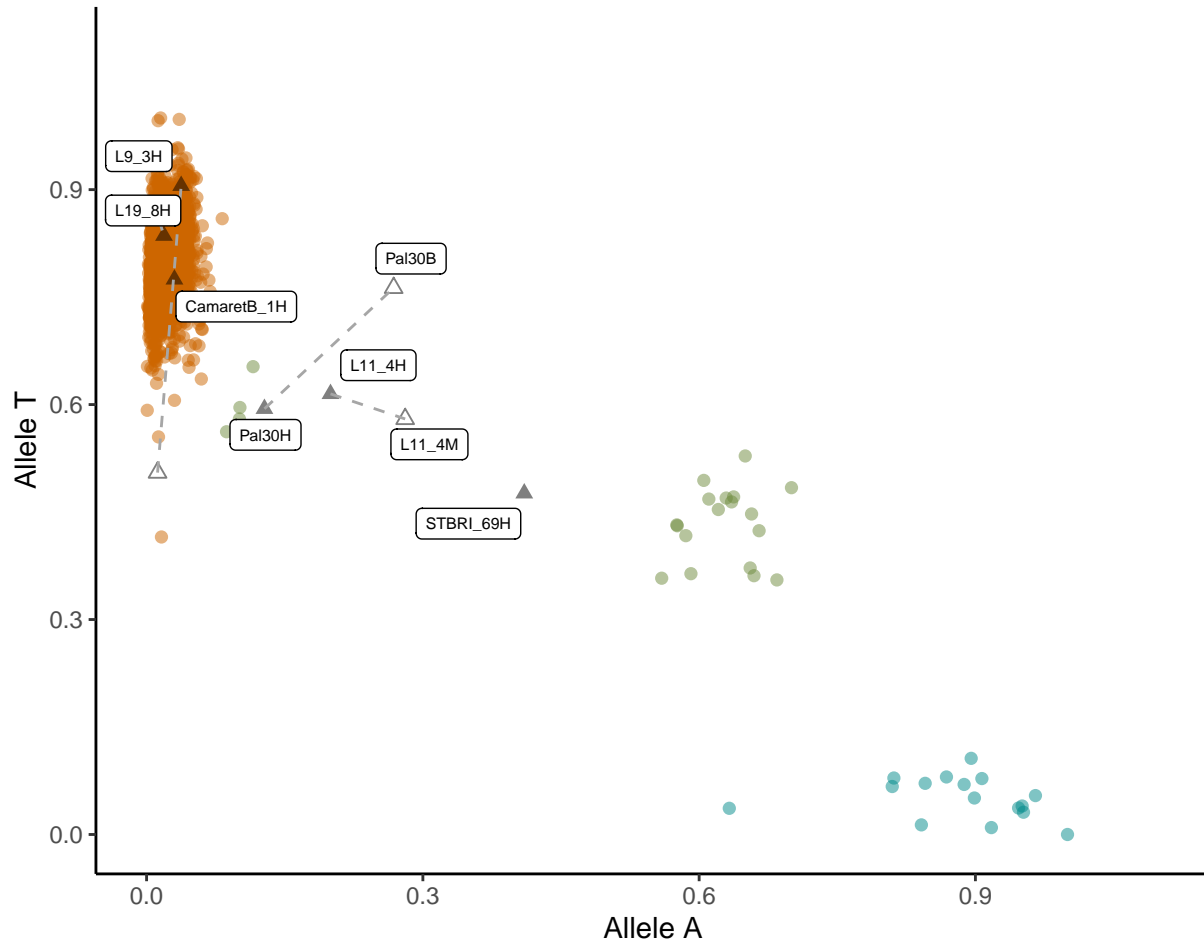

B) Correlation plot: 043-C3749\_p849

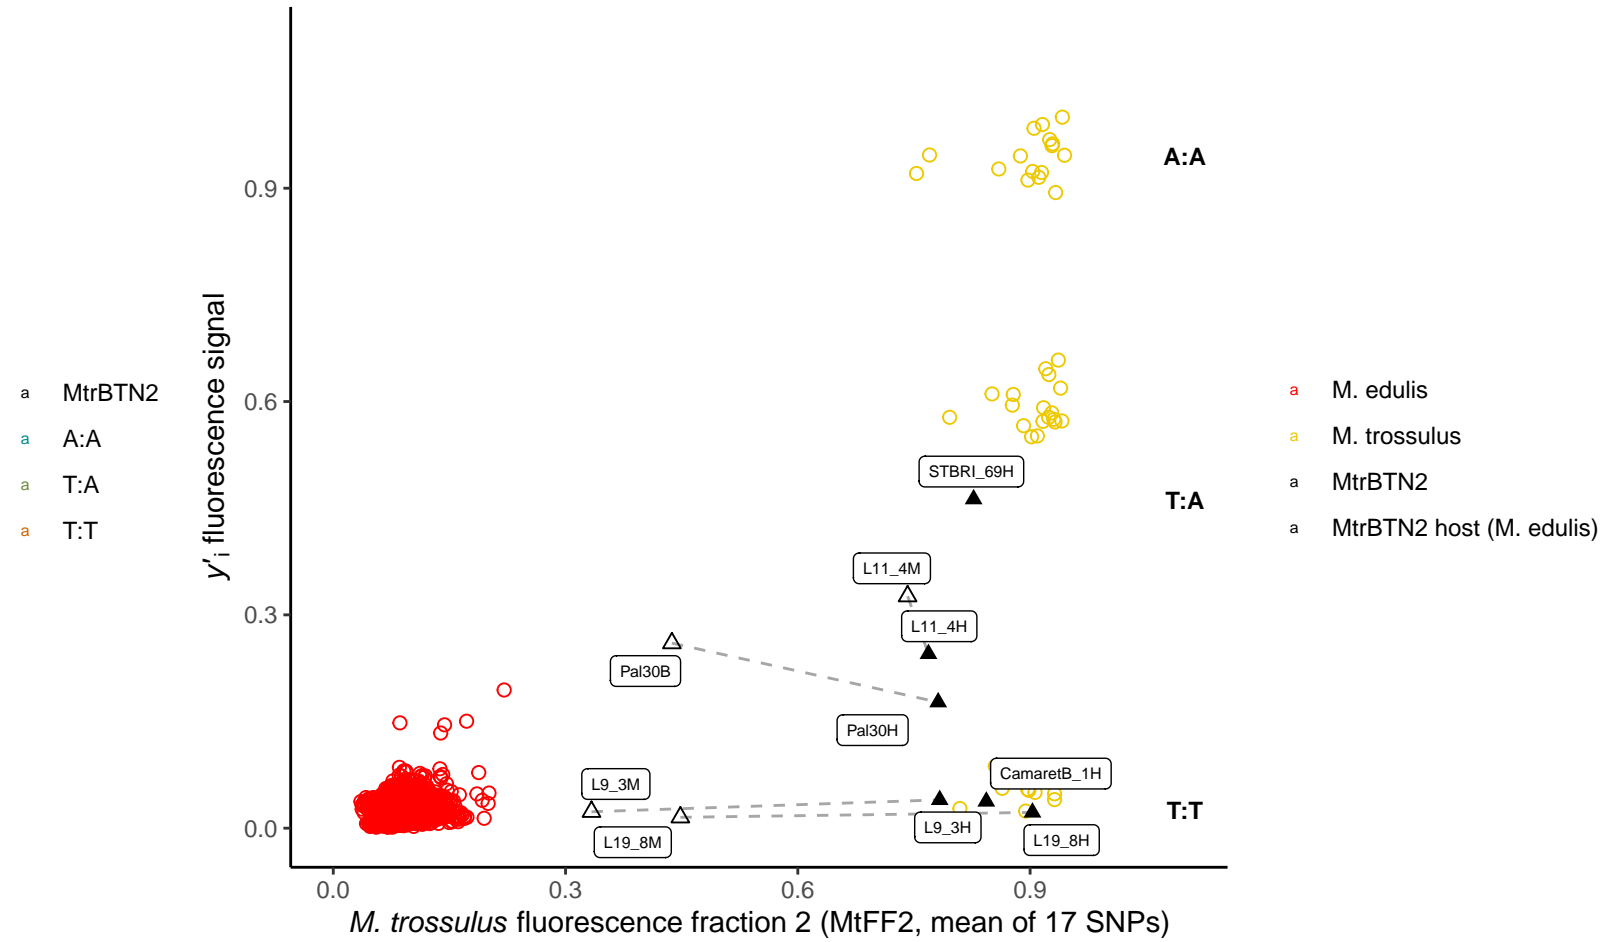

A) KASP fluorescence data plot: 127-gi\_387154976

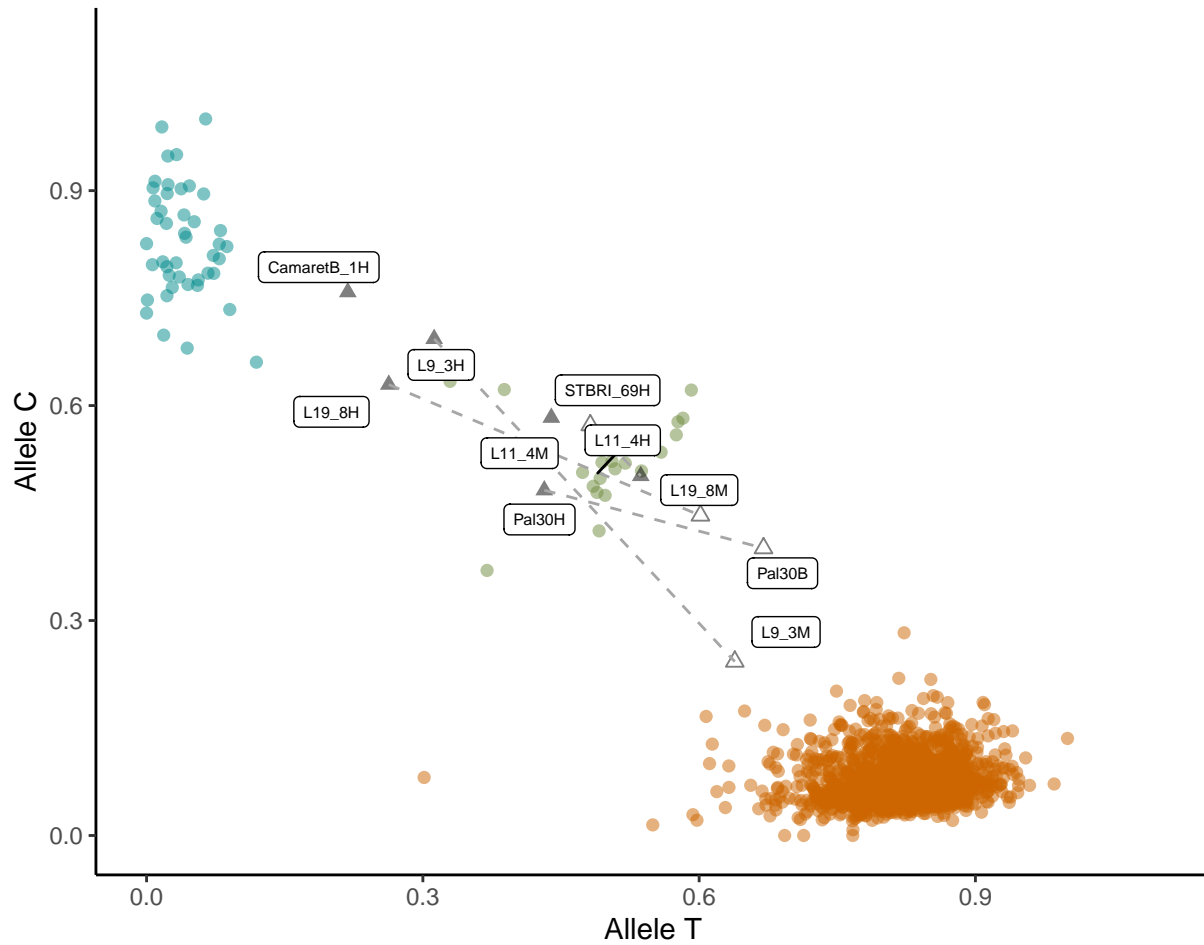

B) Correlation plot: 127-gi\_387154976

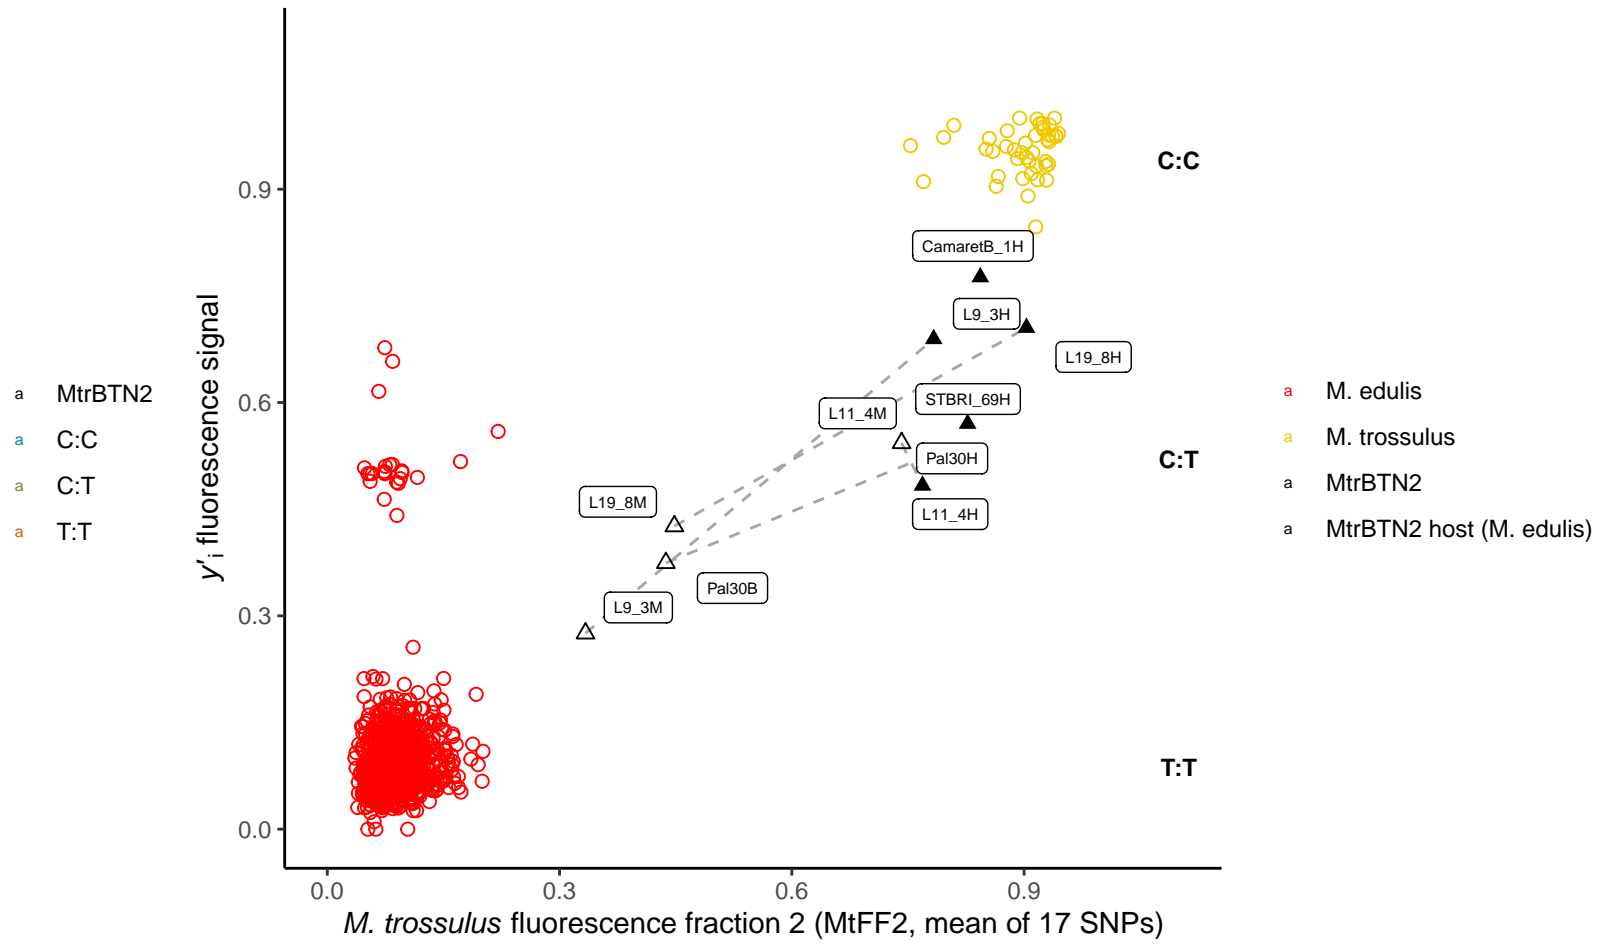



A) KASP fluorescence data plot: 617-loc359\_id5887\_p8

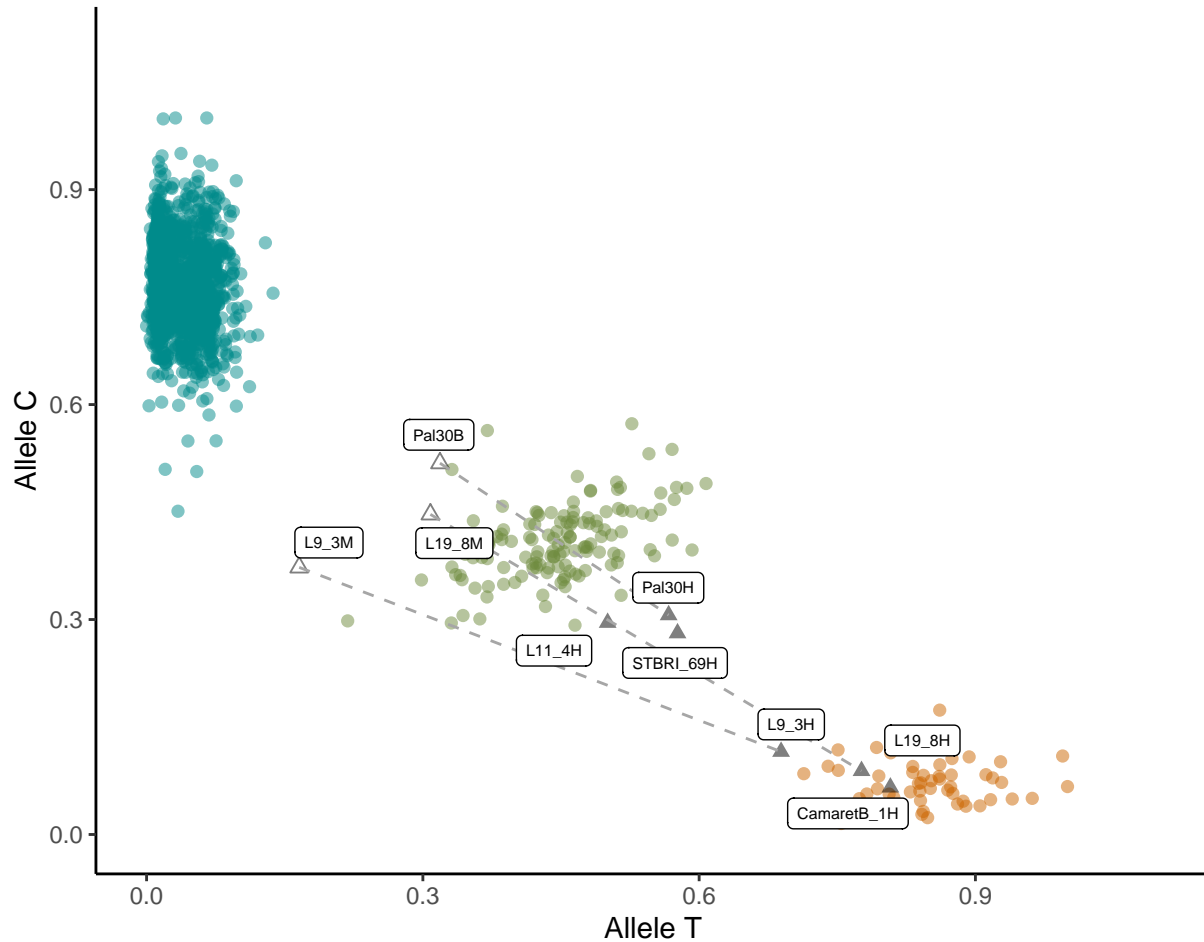

B) Correlation plot: 617-loc359\_id5887\_p8

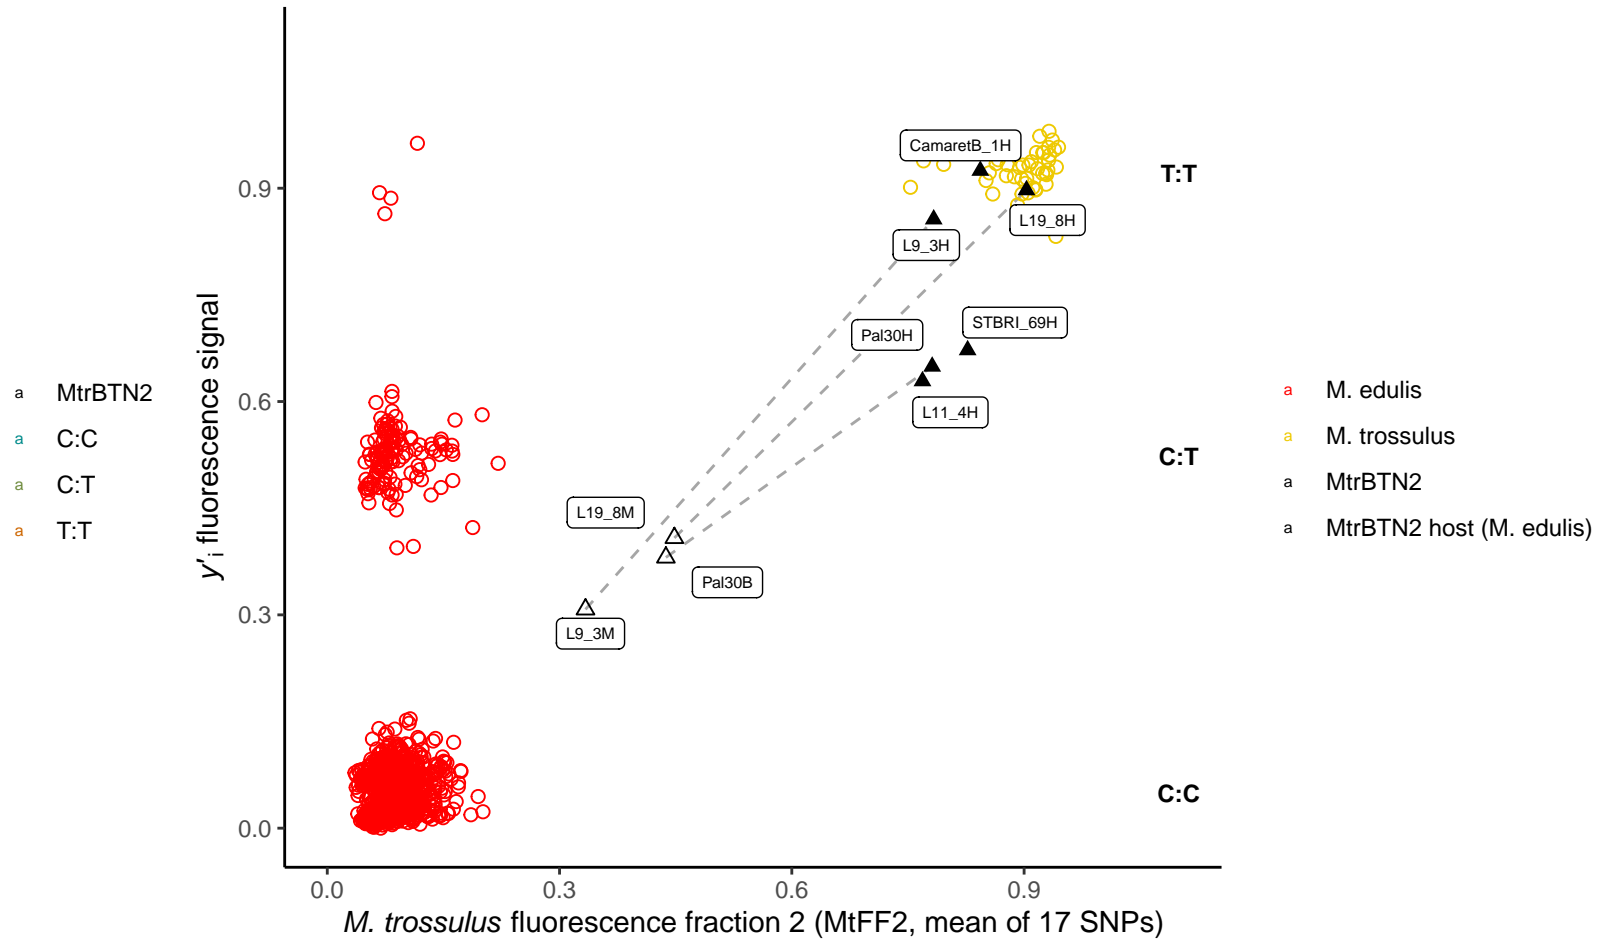



A) KASP fluorescence data plot: 047-C40145\_p294

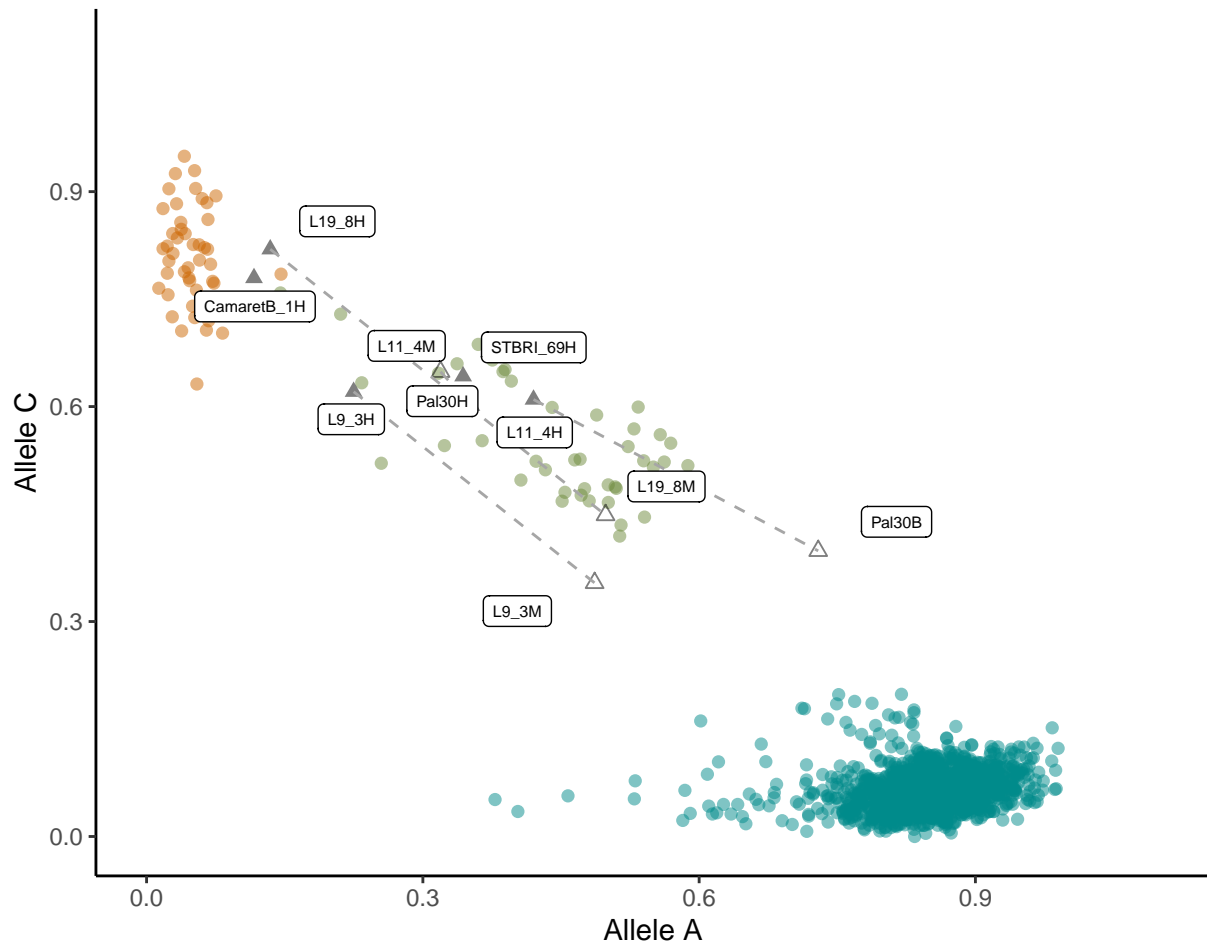

B) Correlation plot: 047-C40145\_p294

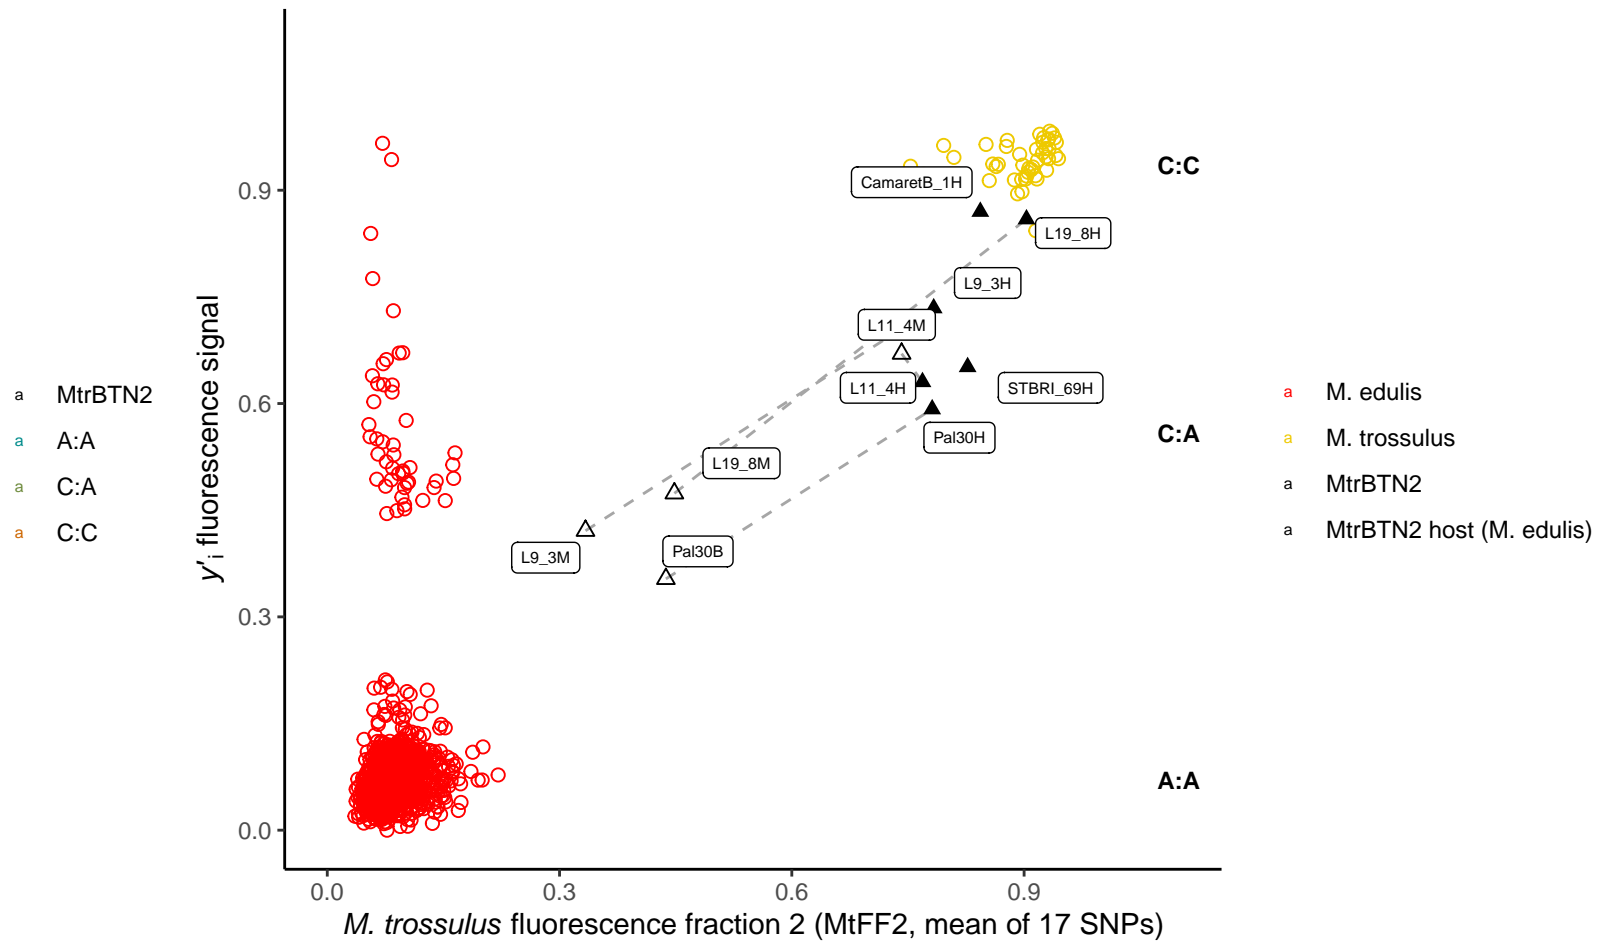

A) KASP fluorescence data plot: 022-C20739\_p355

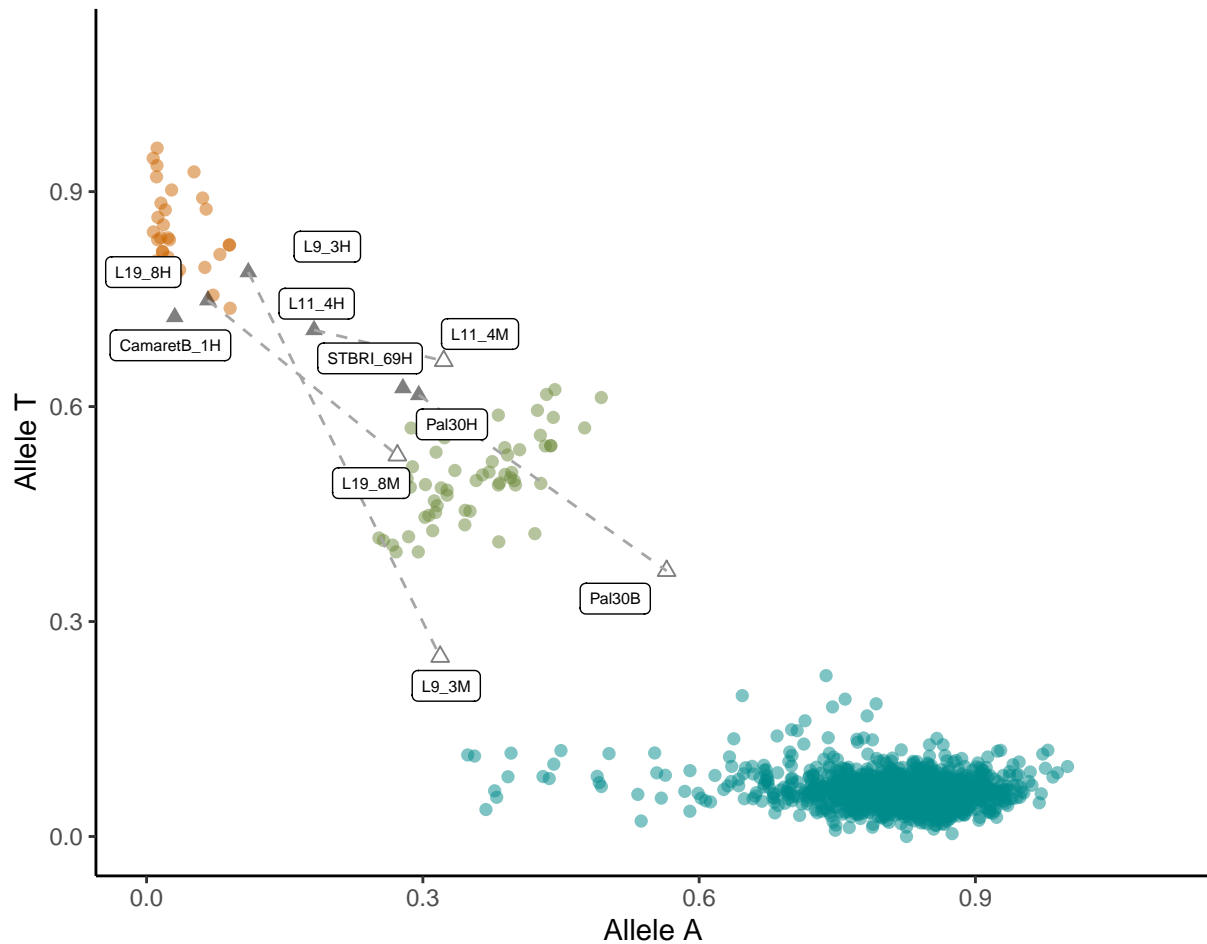

B) Correlation plot: 022-C20739\_p355

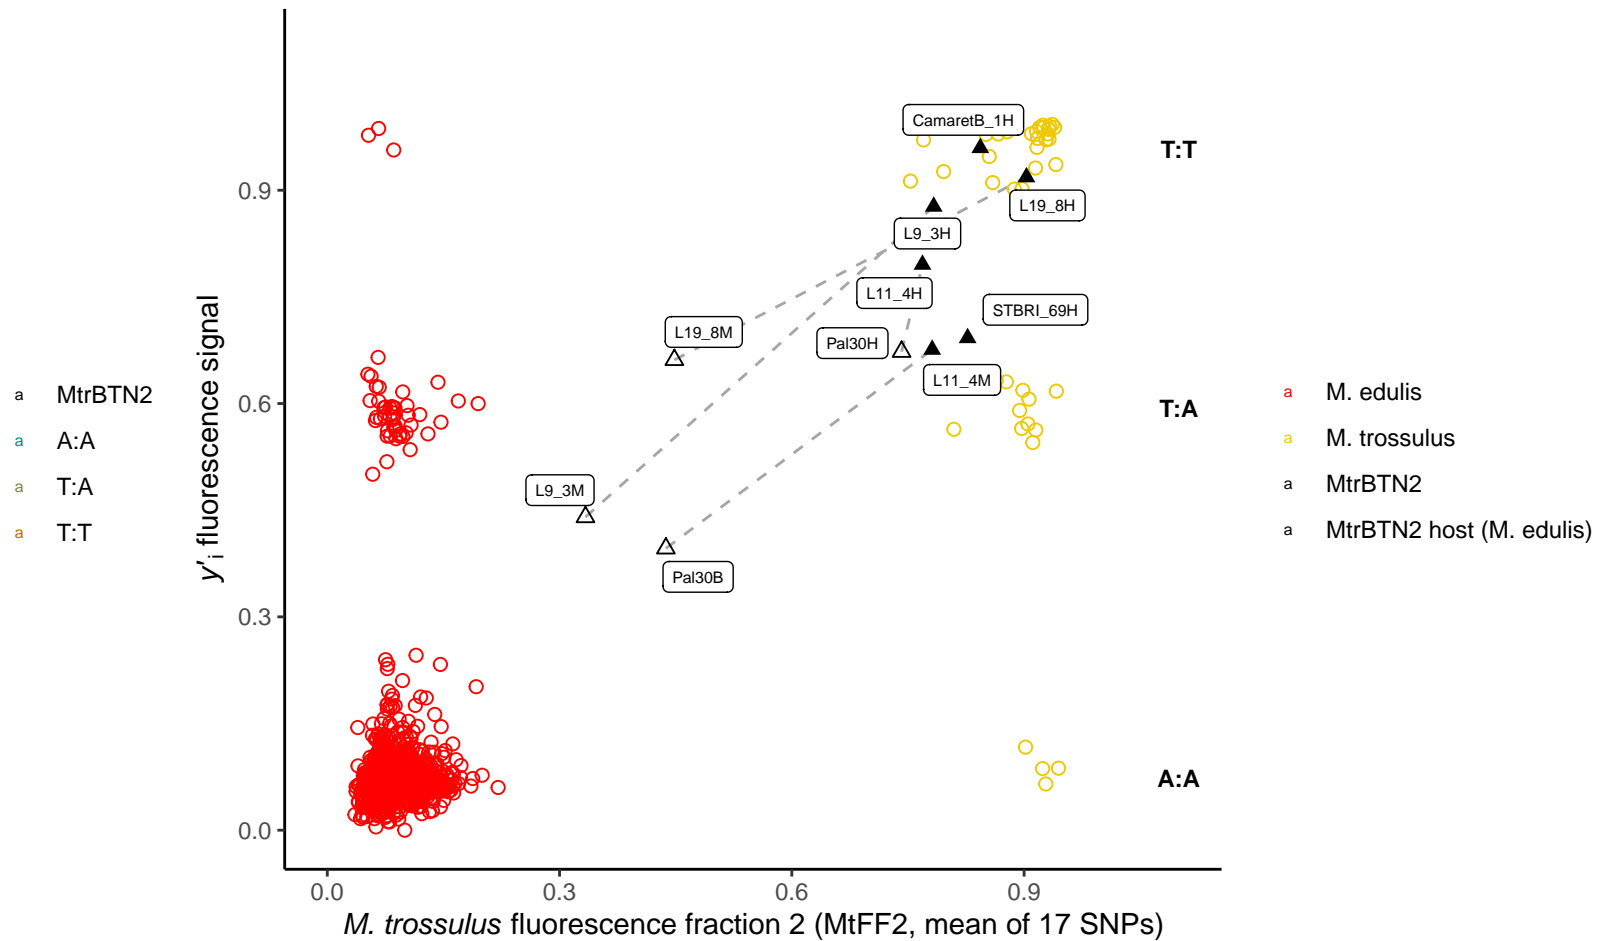

A) KASP fluorescence data plot: 187-soap\_C3422\_p3286

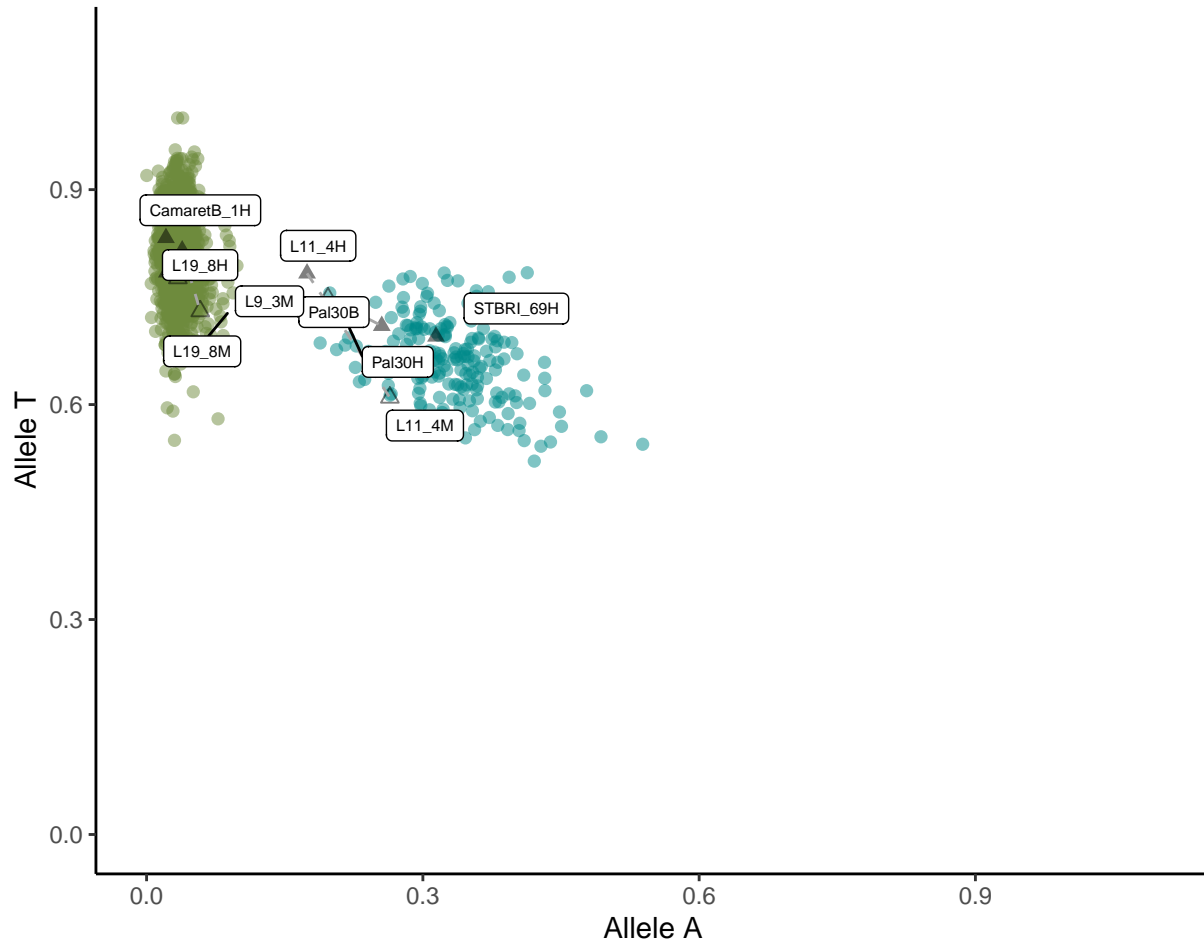

B) Correlation plot: 187-soap\_C3422\_p3286

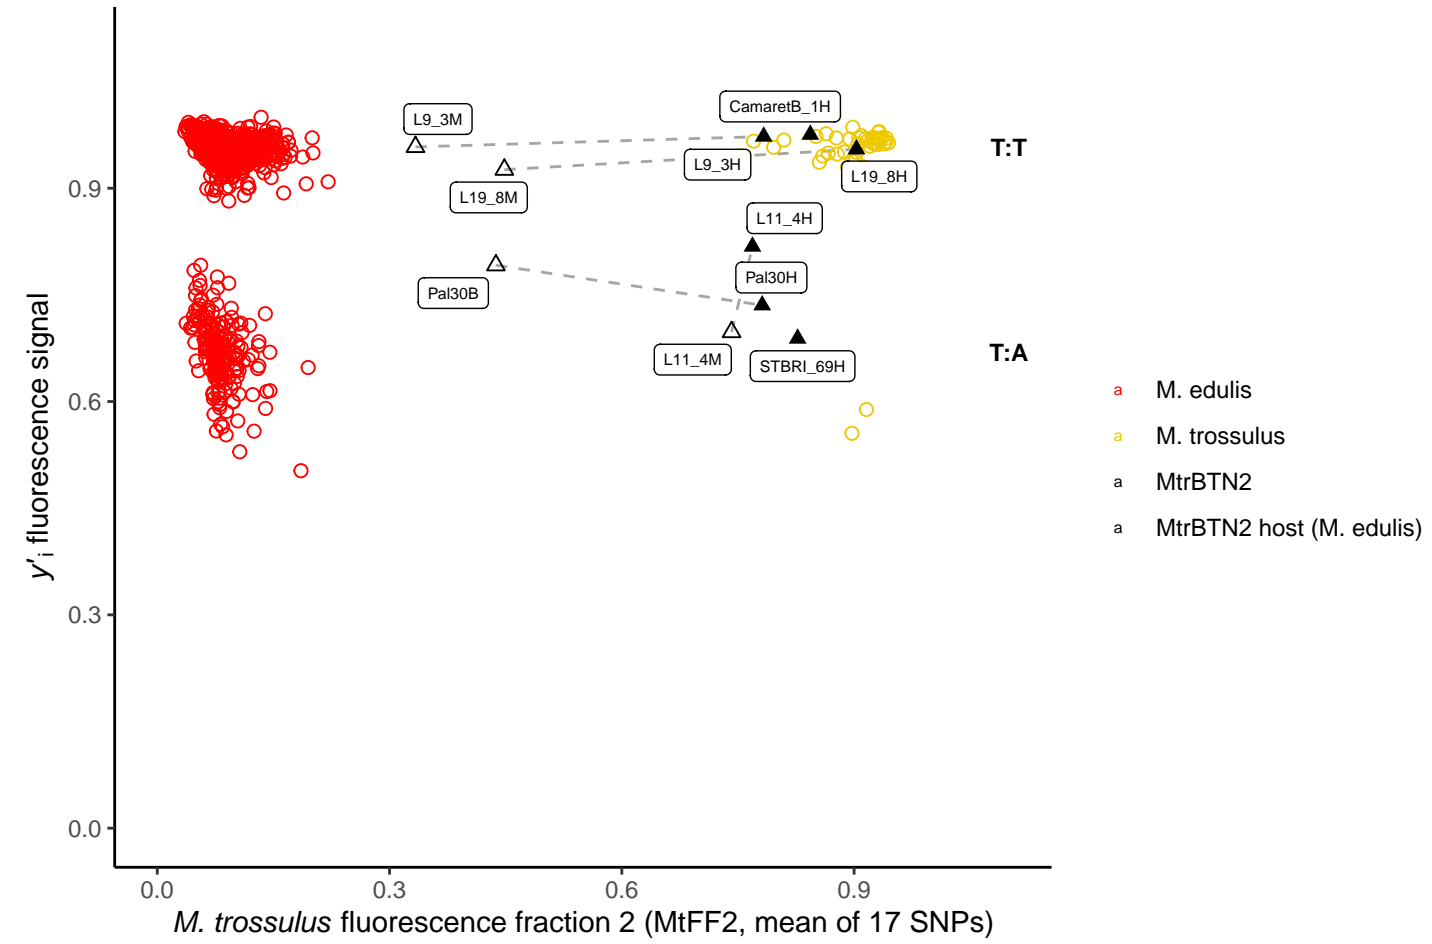

A) KASP fluorescence data plot: 145–abyss\_C216\_p5751

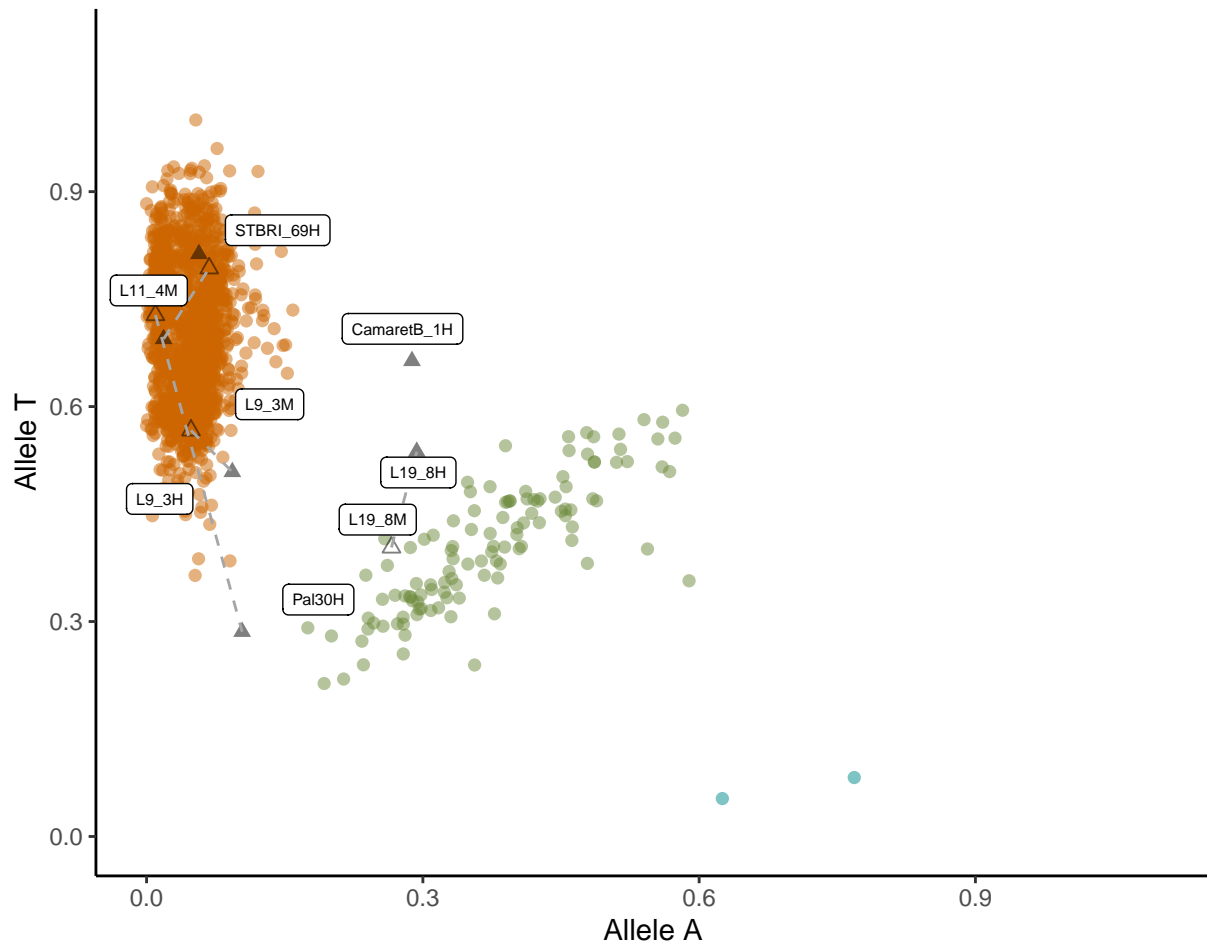

B) Correlation plot: 145–abyss\_C216\_p5751

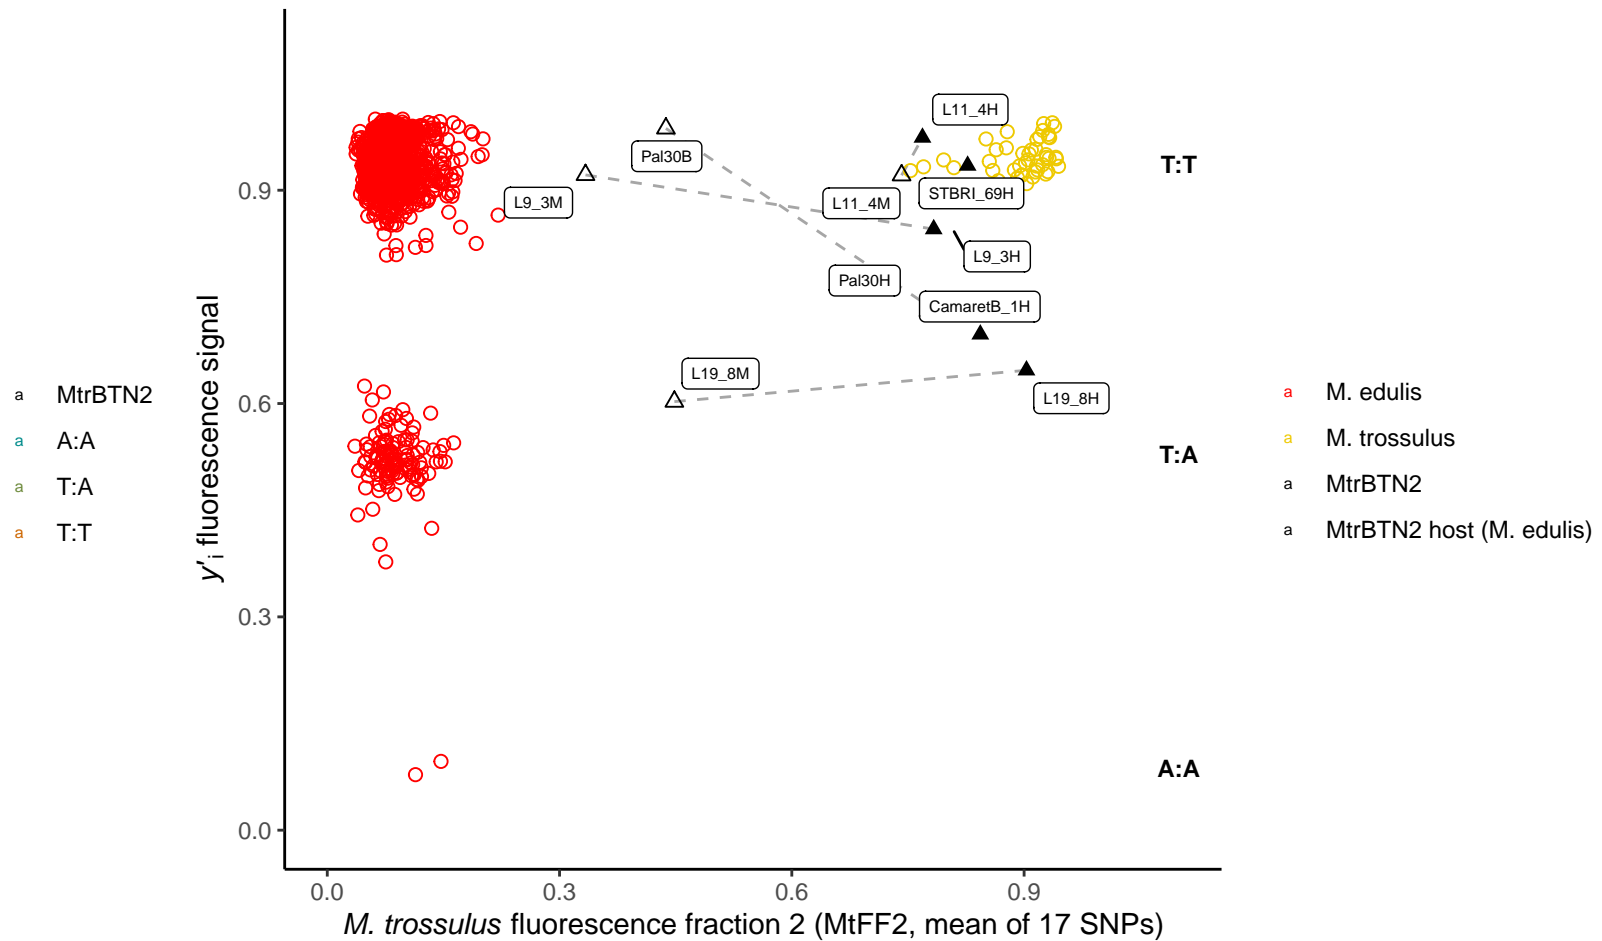

A) KASP fluorescence data plot: 184-soap\_C3118\_p4466

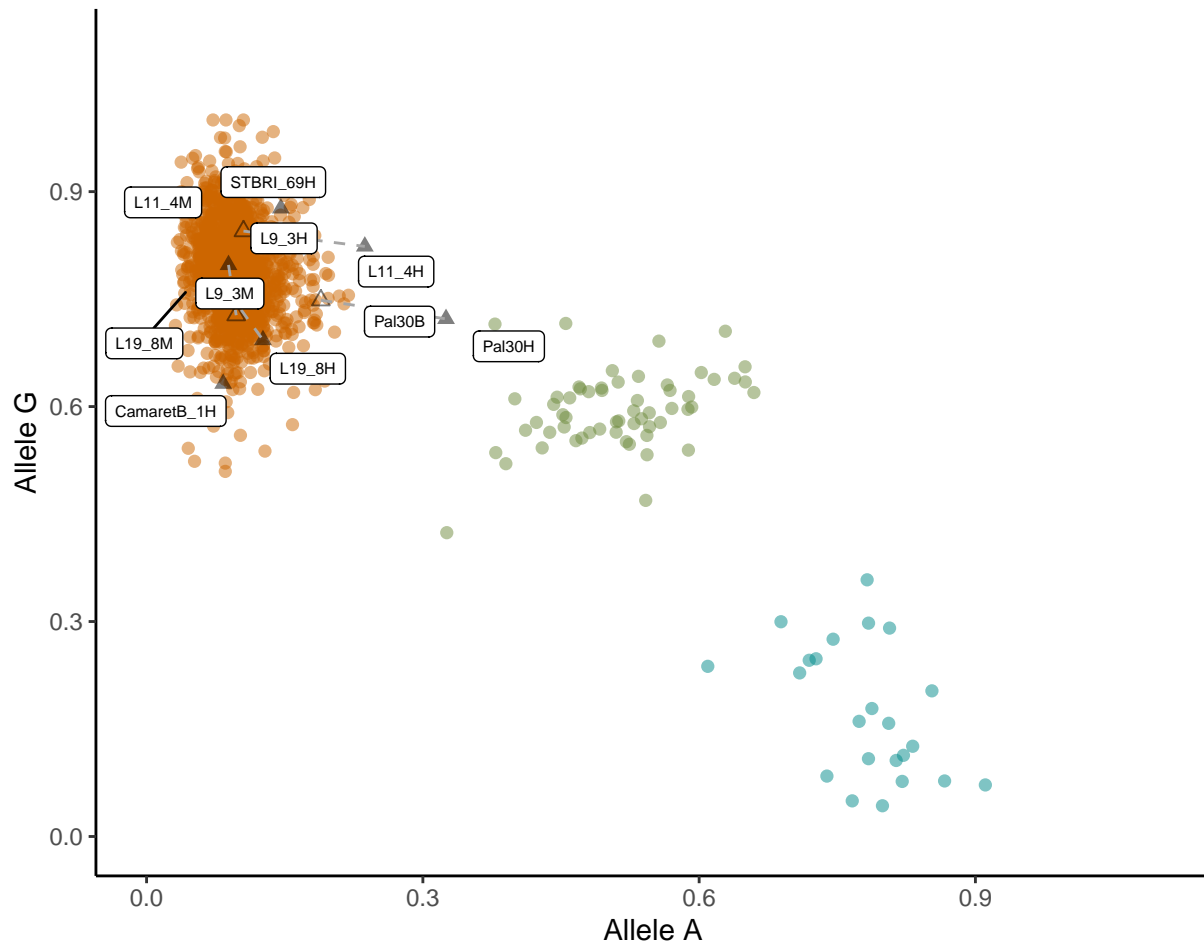

B) Correlation plot: 184-soap\_C3118\_p4466

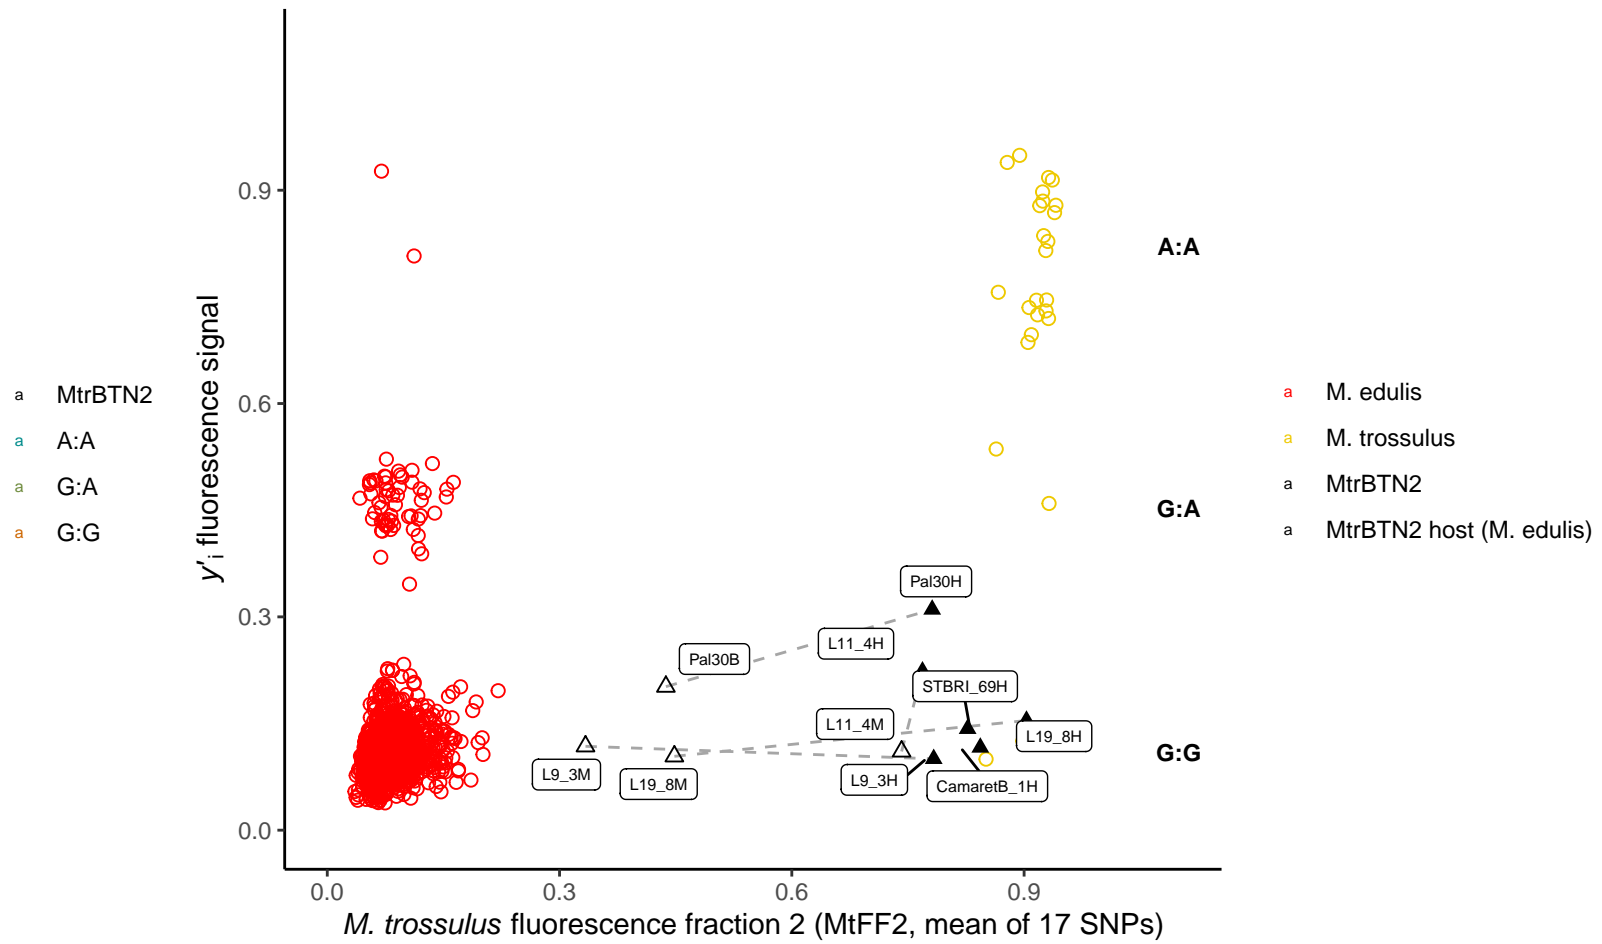

A) KASP fluorescence data plot: 111-gi\_384113180\_emb\_HE609053\_pos1114\_stl\_tva

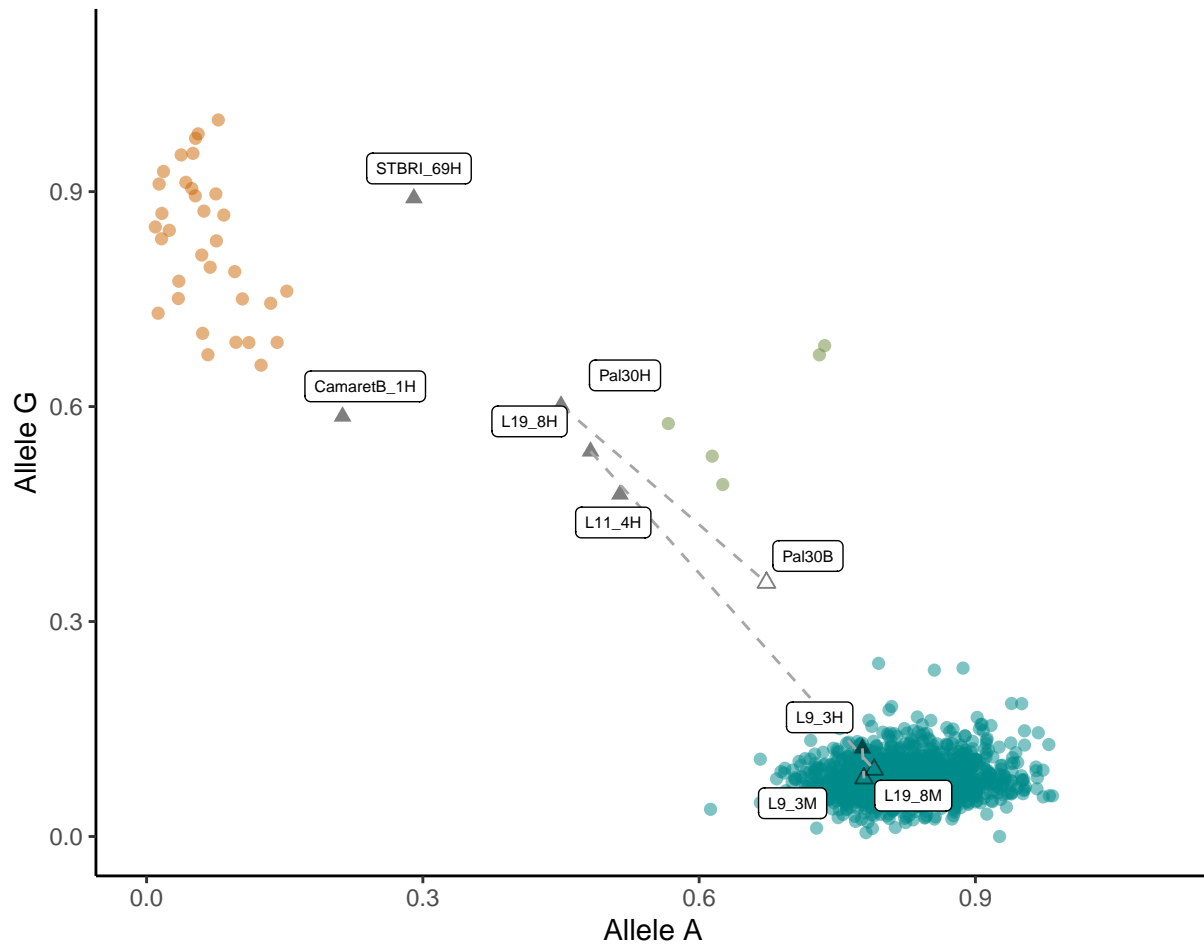

B) Correlation plot: 111-gi\_384113180\_emb\_HE609053\_pos1114\_stl\_tva

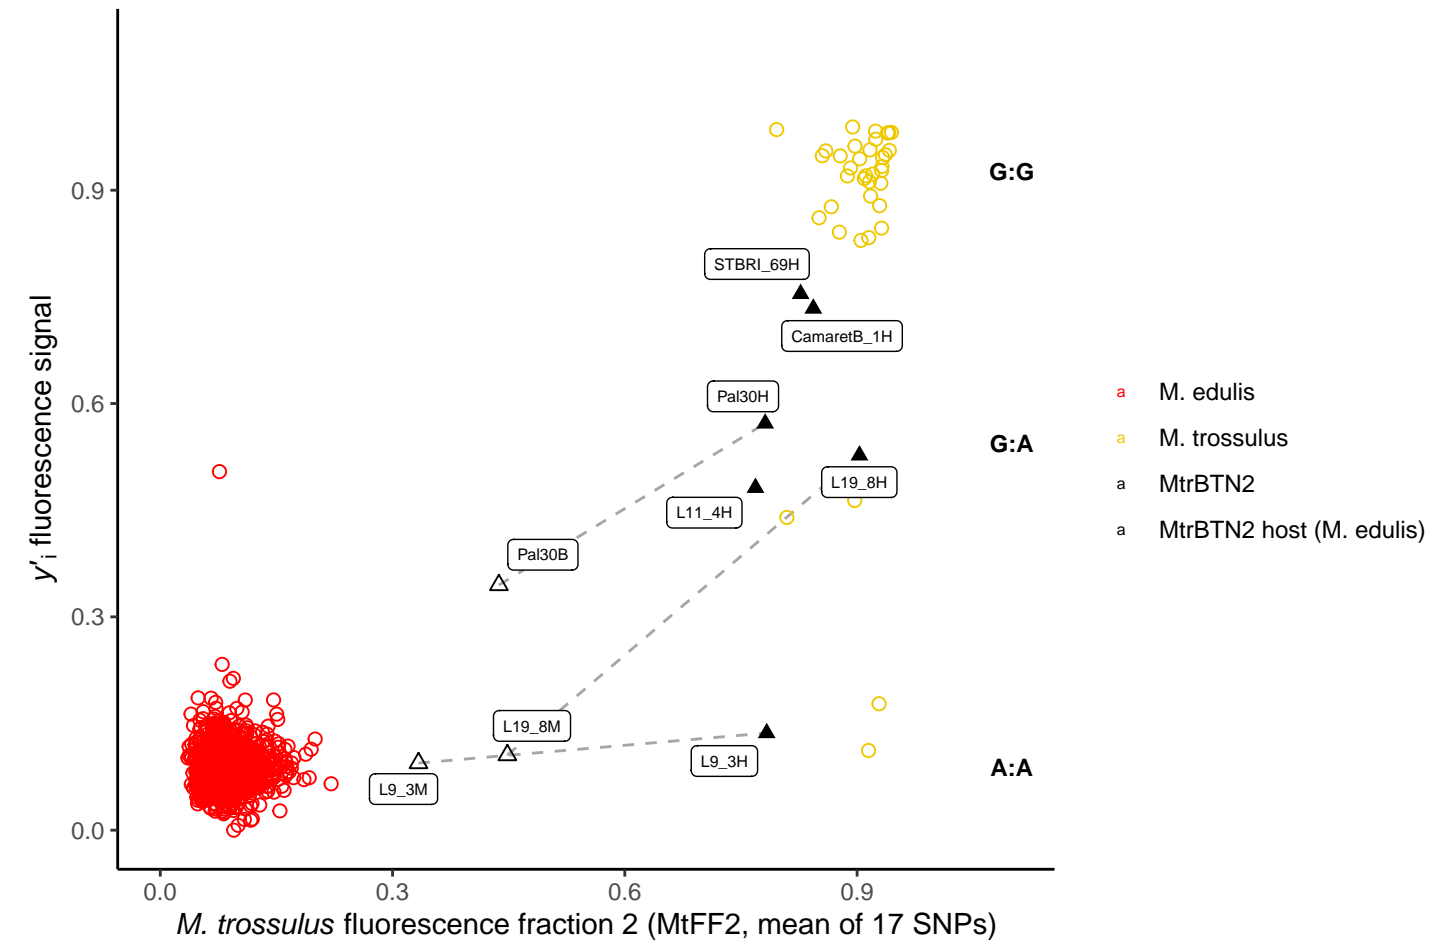



A) KASP fluorescence data plot: 108-gi\_37650308\_gb\_AJ516731\_pos350\_stl\_tva

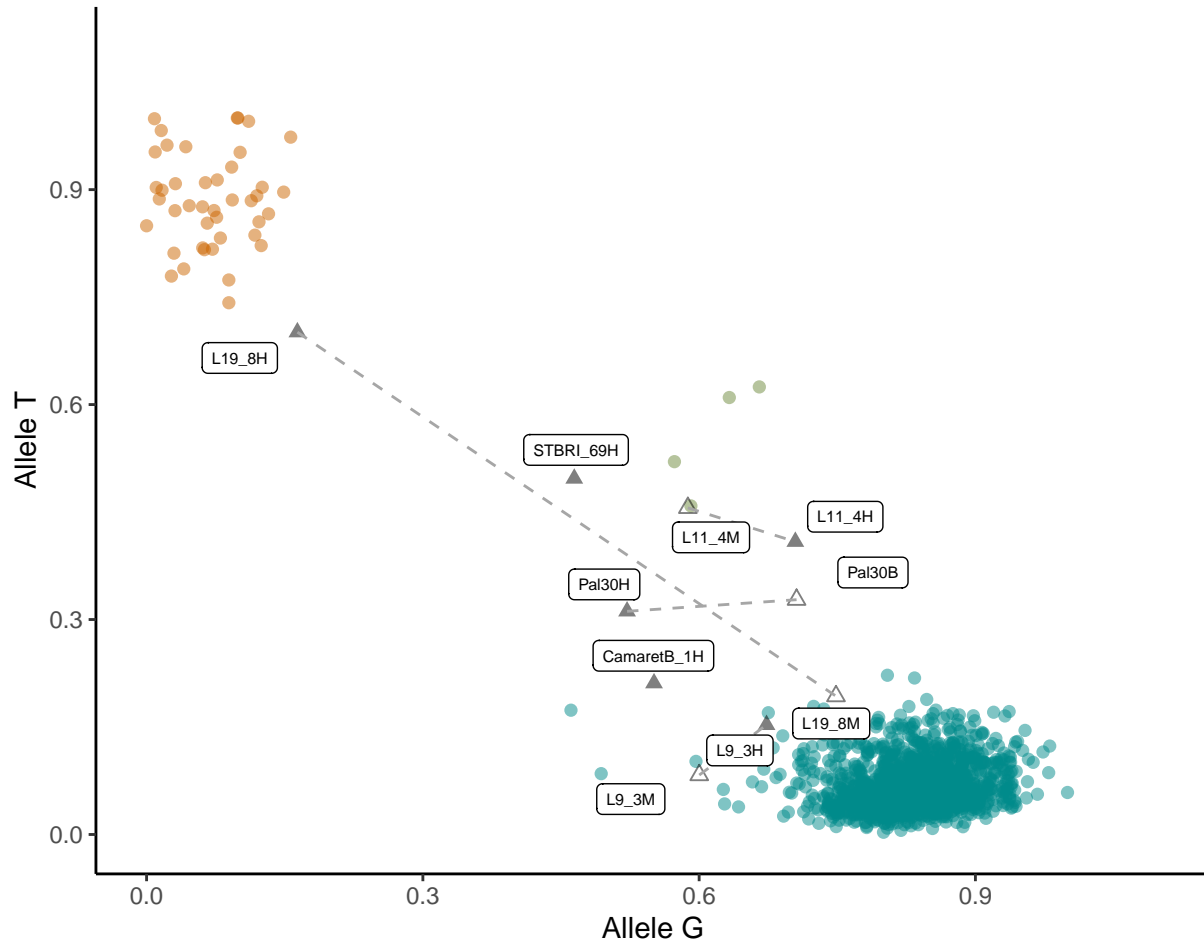

B) Correlation plot: 108-gi\_37650308\_gb\_AJ516731\_pos350\_stl\_tva

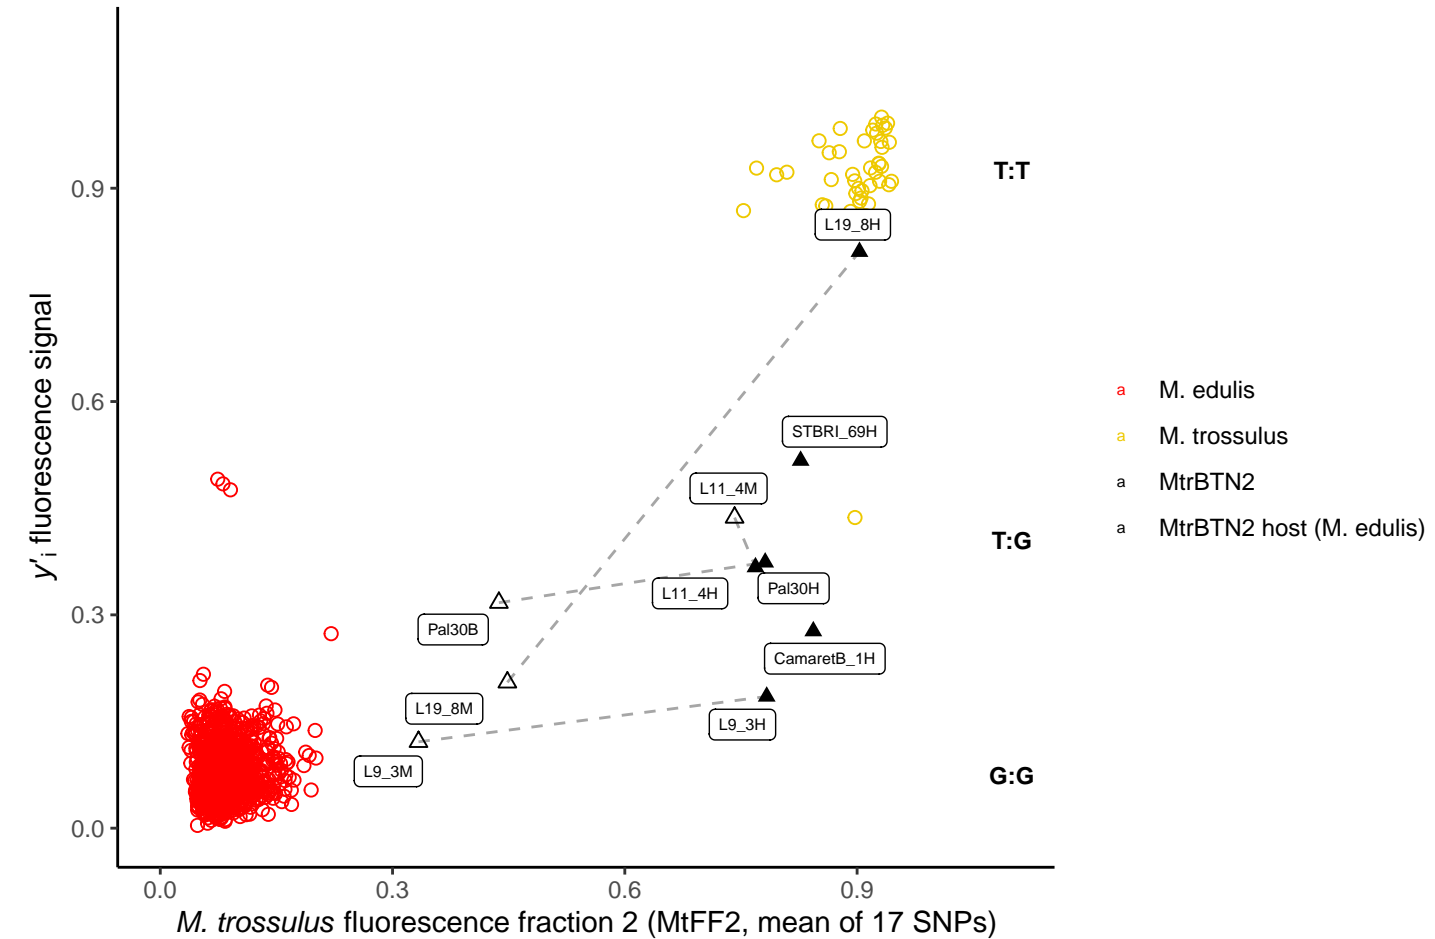

A) KASP fluorescence data plot: 109-gi\_380851736\_gb\_Contig10267\_pos417\_Edu\_EU

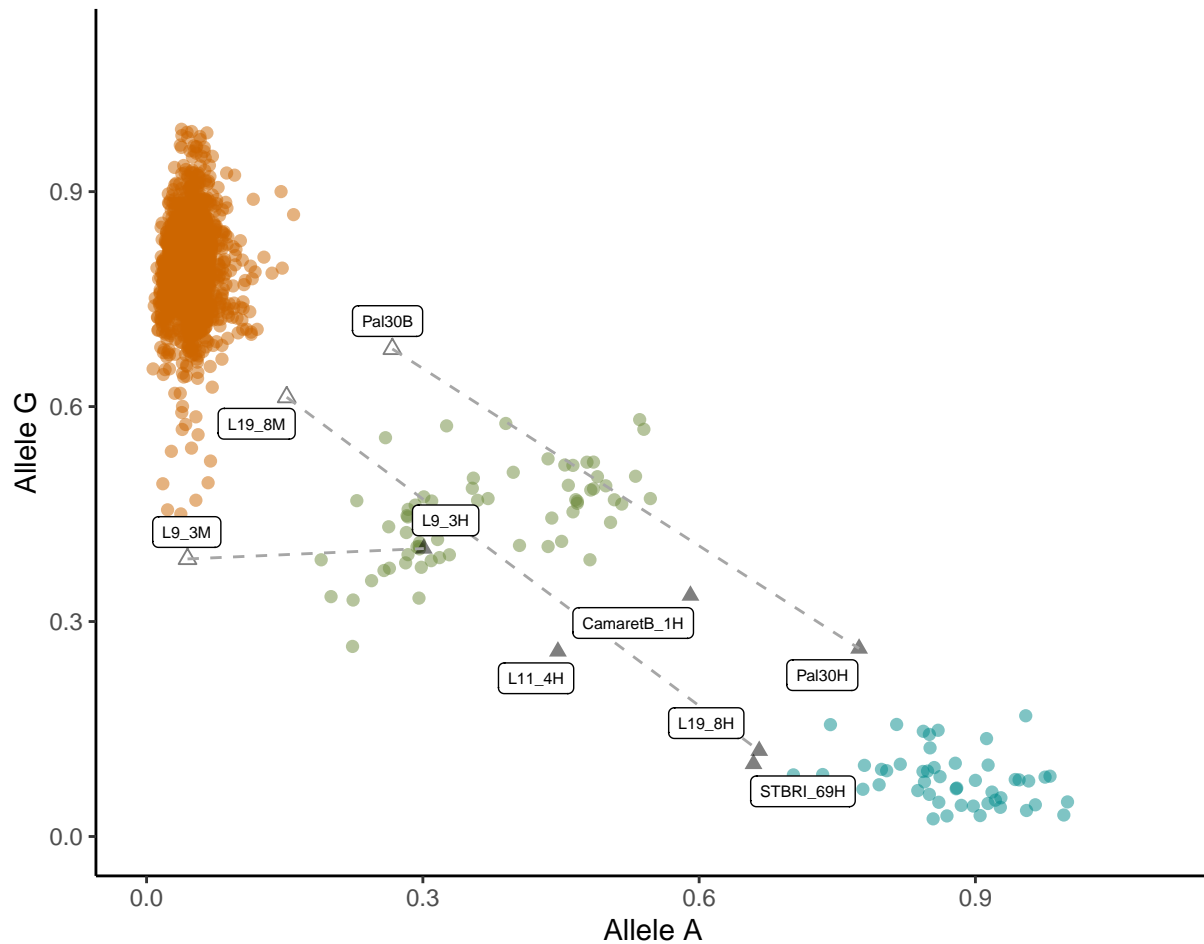

B) Correlation plot: 109-gi\_380851736\_gb\_Contig10267\_pos417\_Edu\_EU\_US

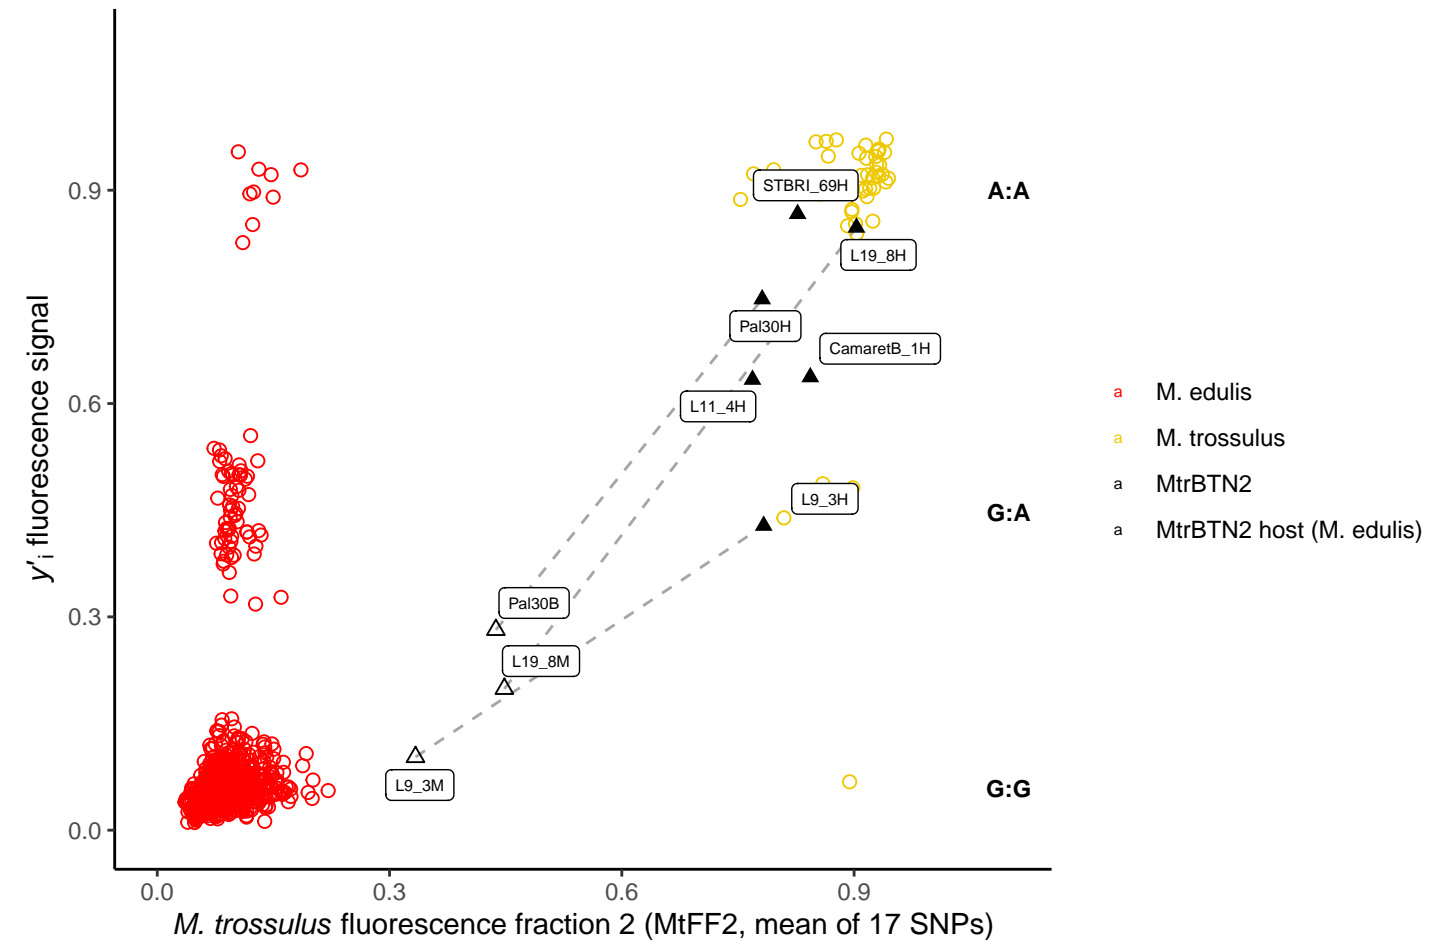

A) KASP fluorescence data plot: 803-C22777\_GA36A\_p300

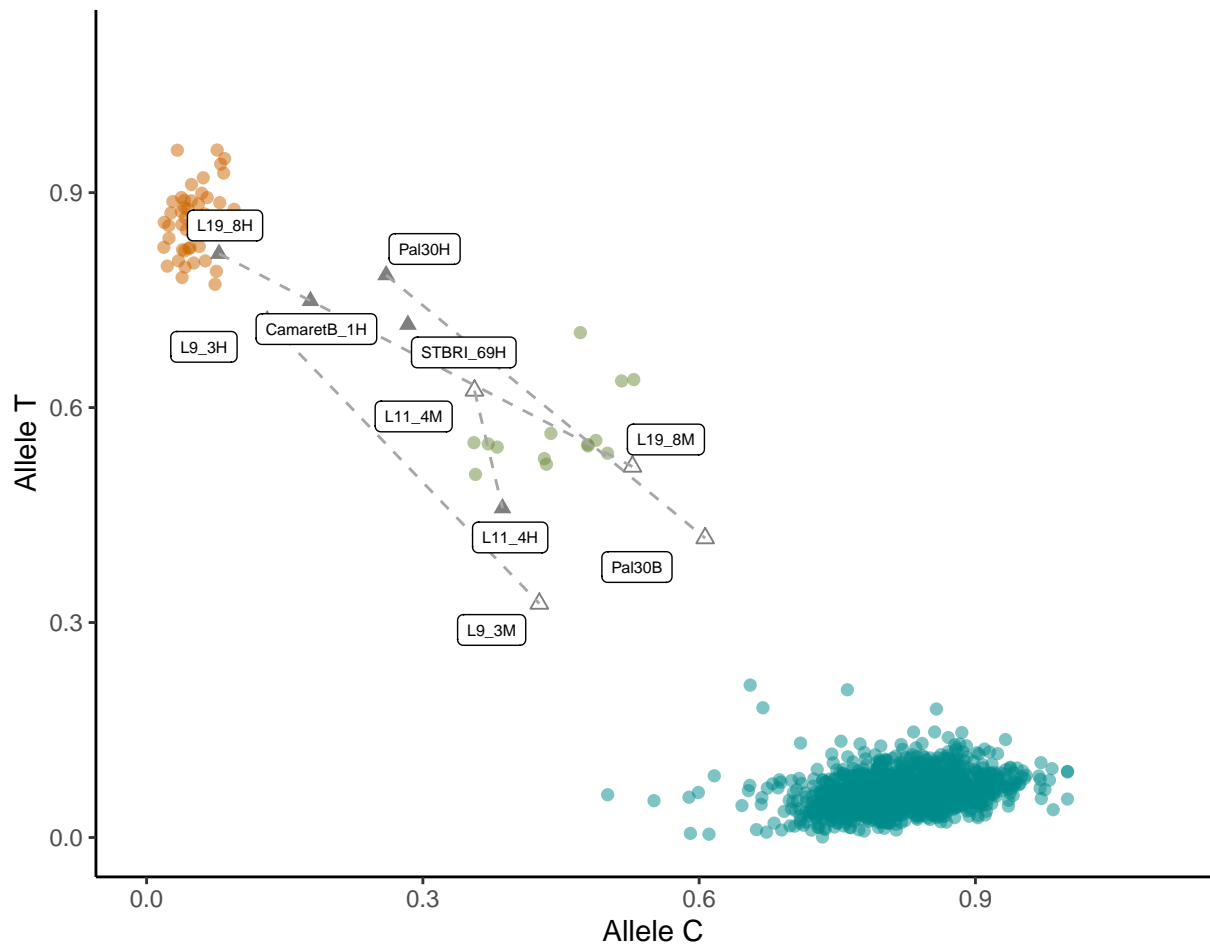

B) Correlation plot: 803-C22777\_GA36A\_p300

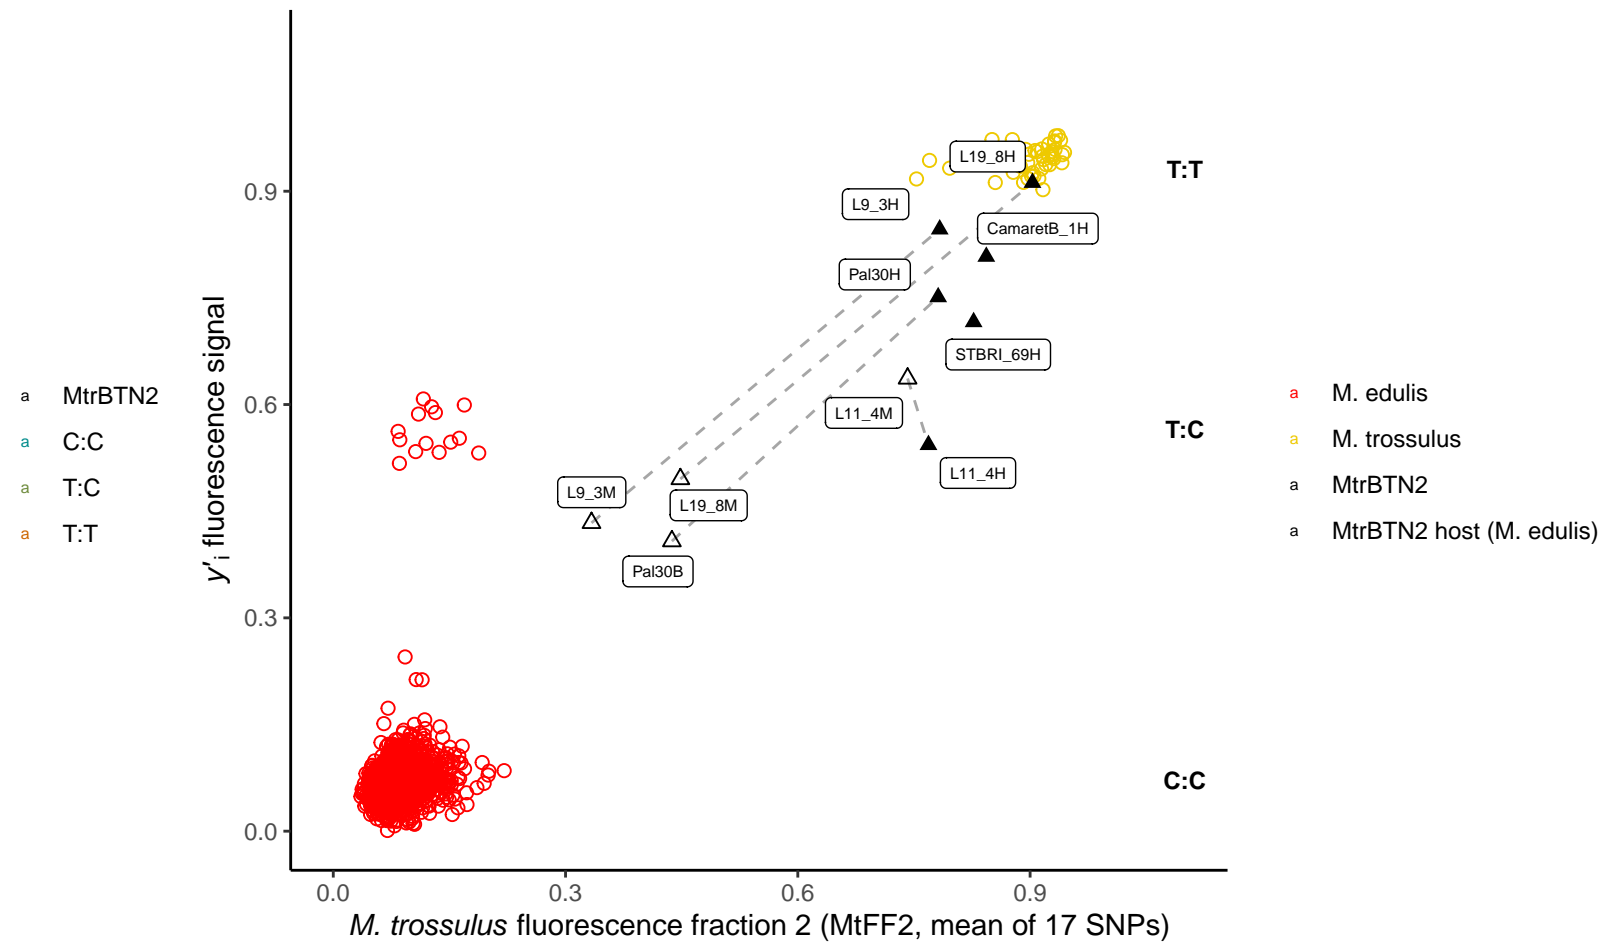

A) KASP fluorescence data plot: 419-gi\_38635427

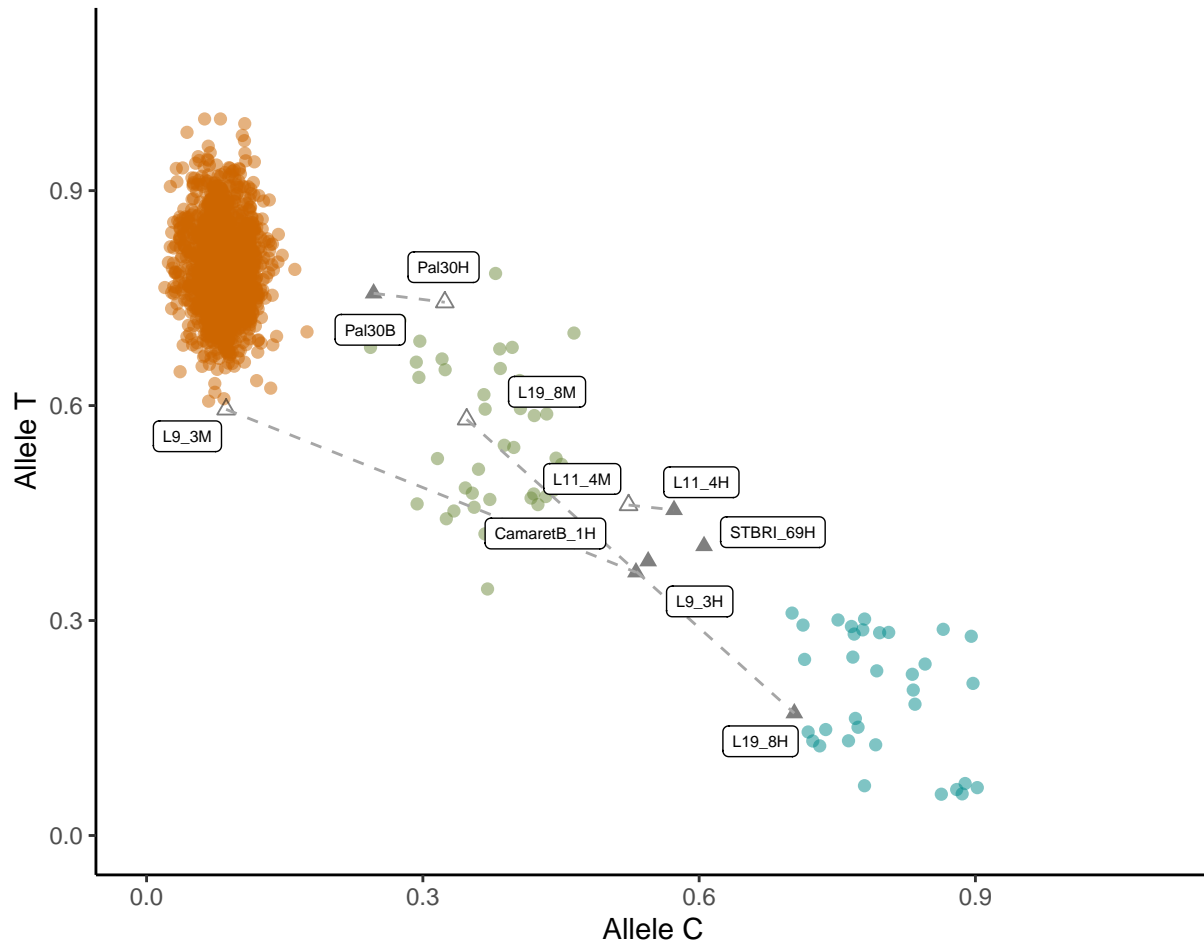

B) Correlation plot: 419-gi\_38635427

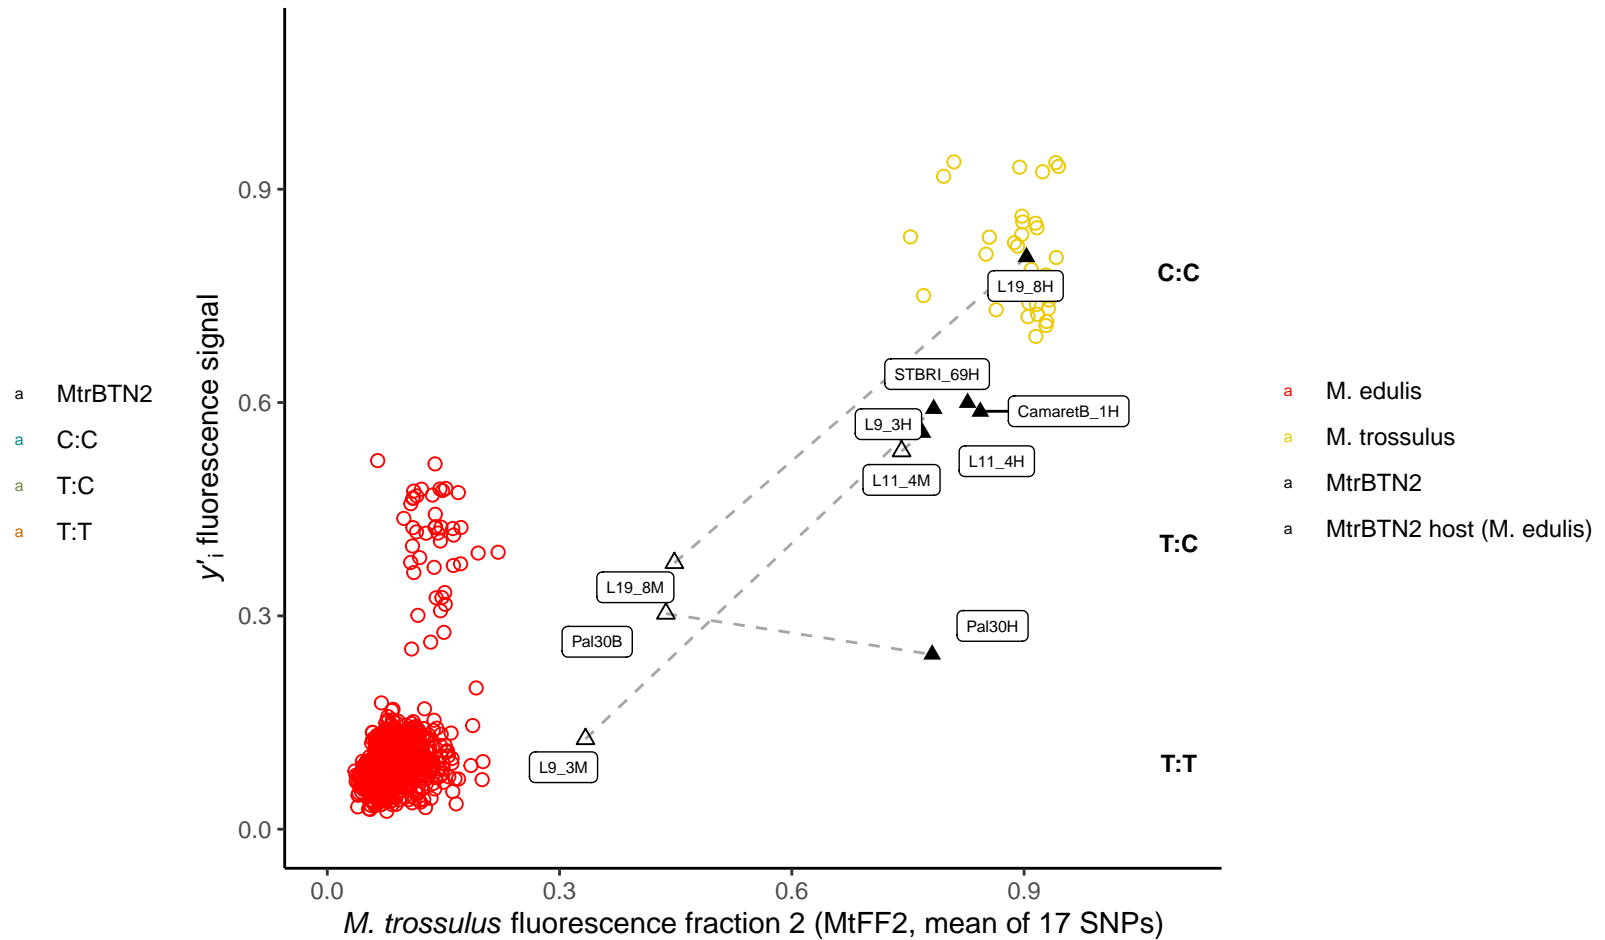

A) KASP fluorescence data plot: 505–abyss\_C723\_p2319

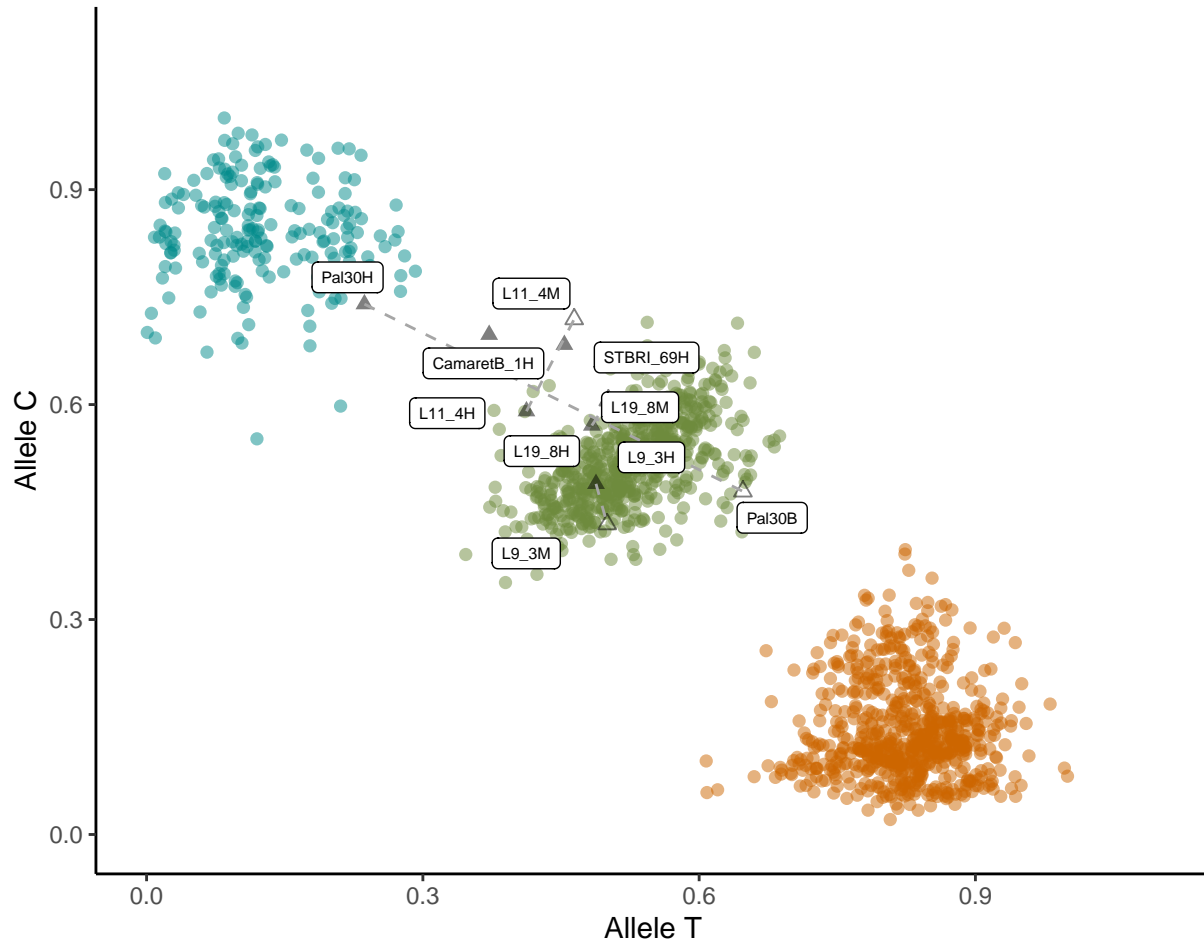

B) Correlation plot: 505–abyss\_C723\_p2319

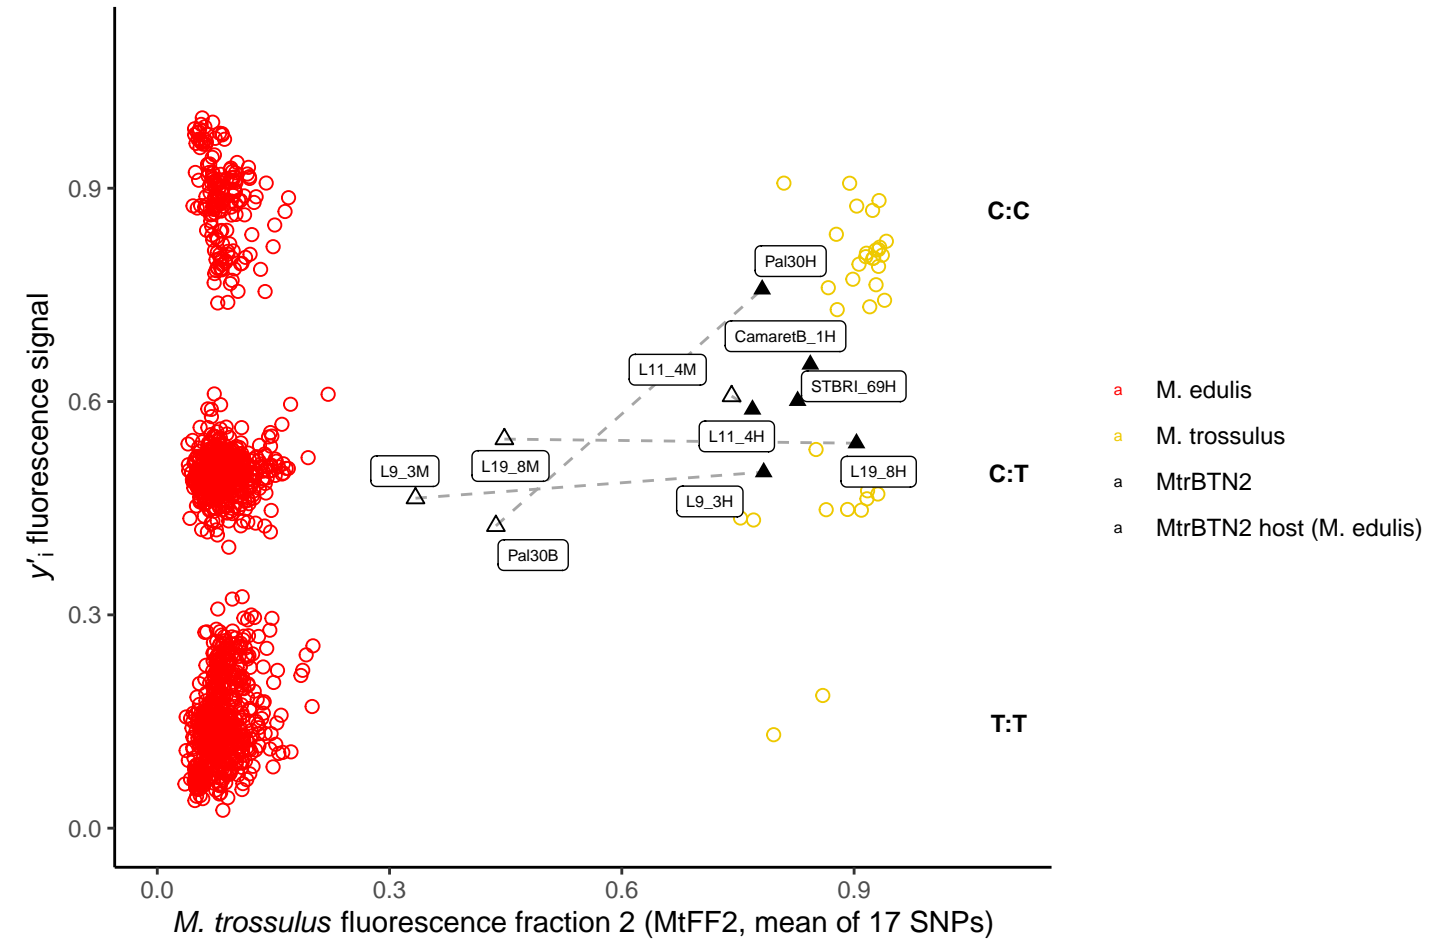

A) KASP fluorescence data plot: 126-gi\_387154971

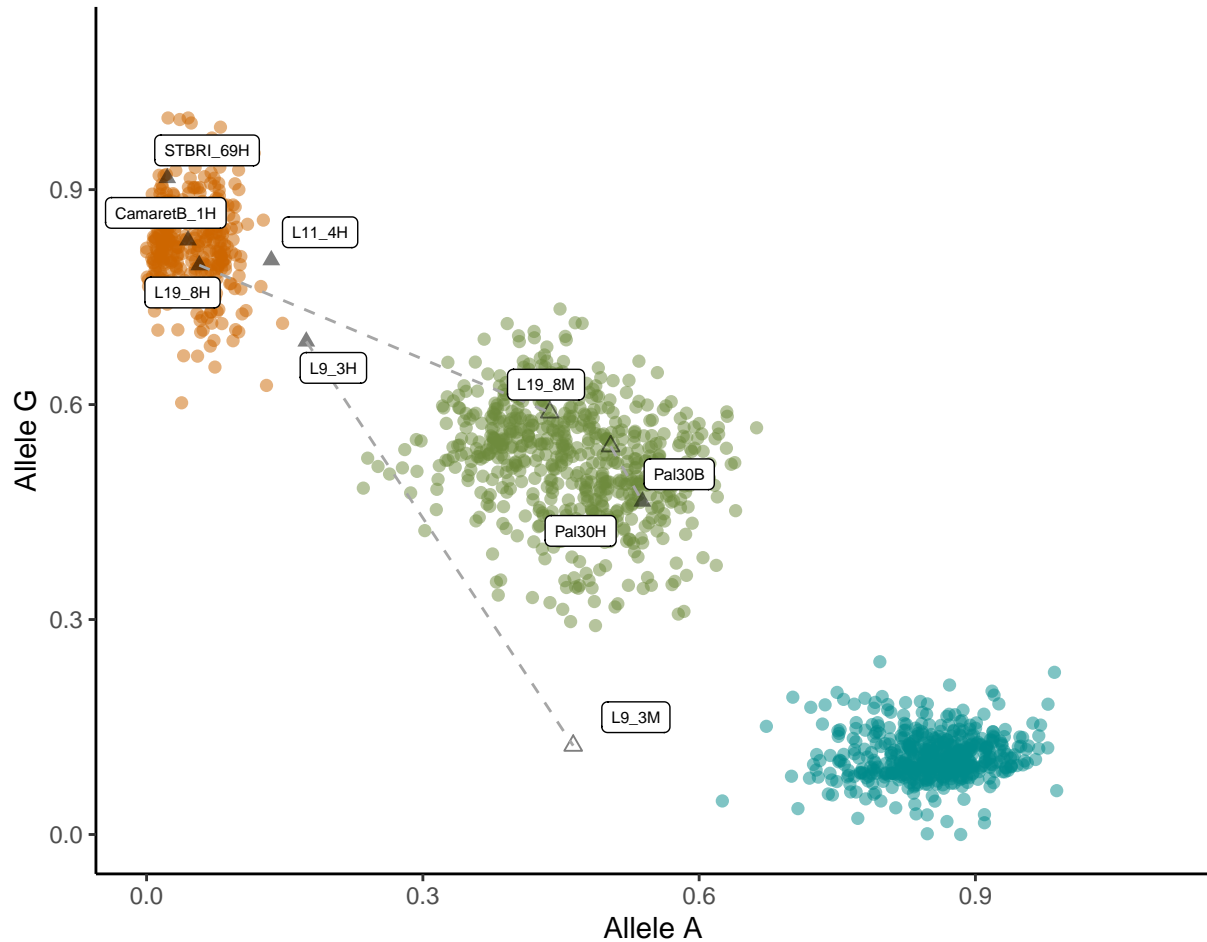

B) Correlation plot: 126-gi\_387154971

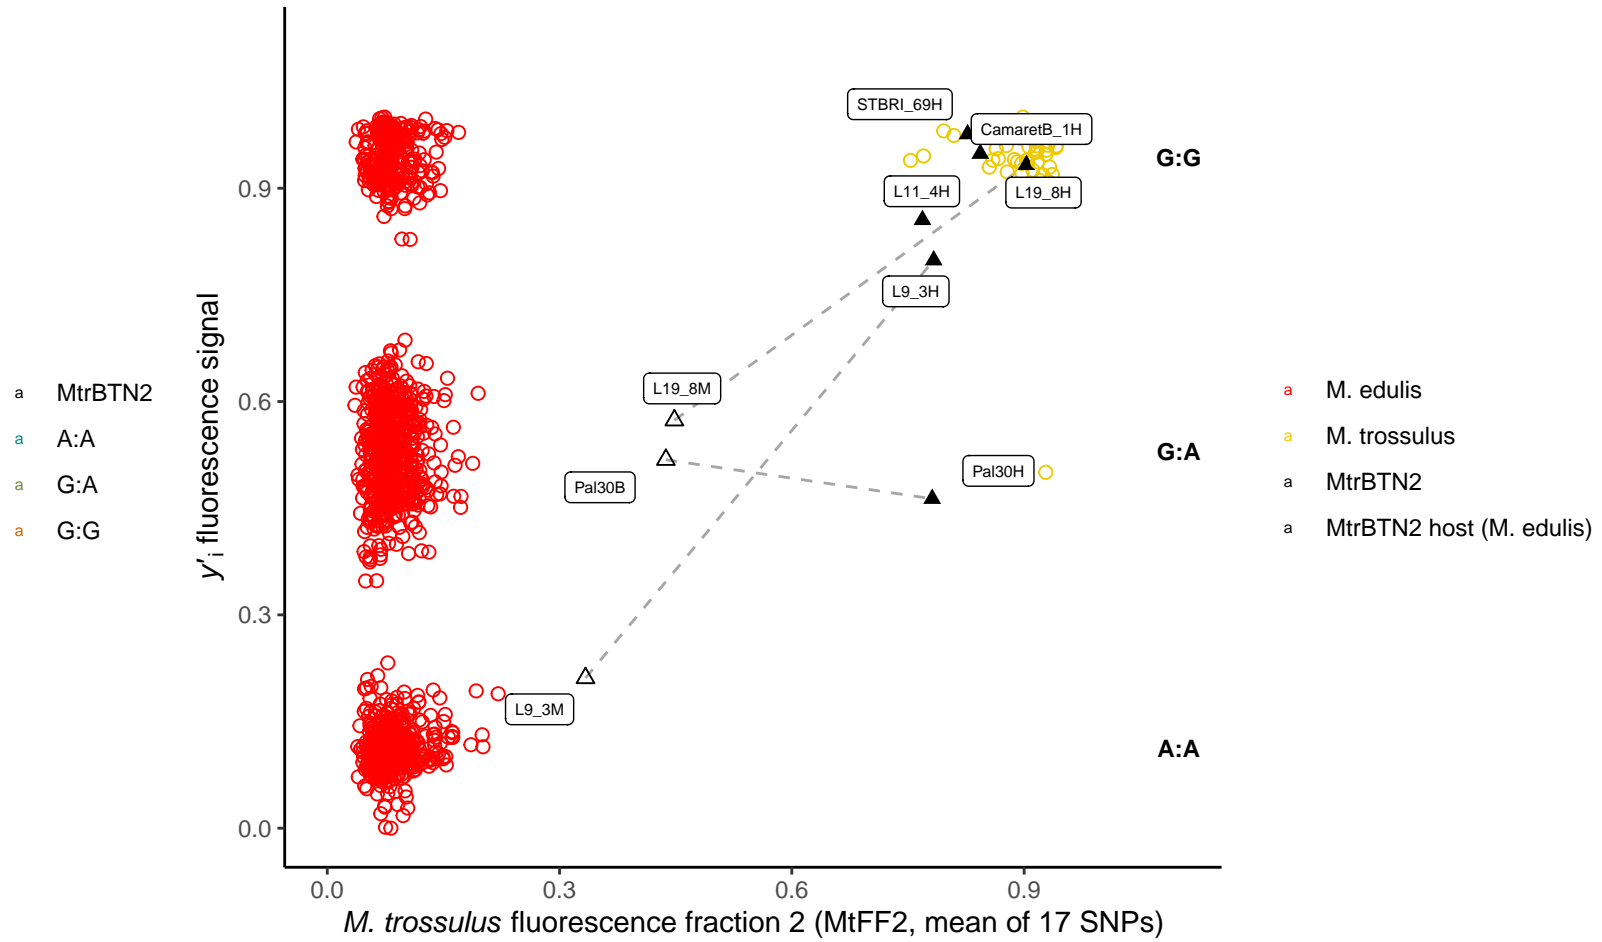

A) KASP fluorescence data plot: 508-soap\_C2331\_p1911

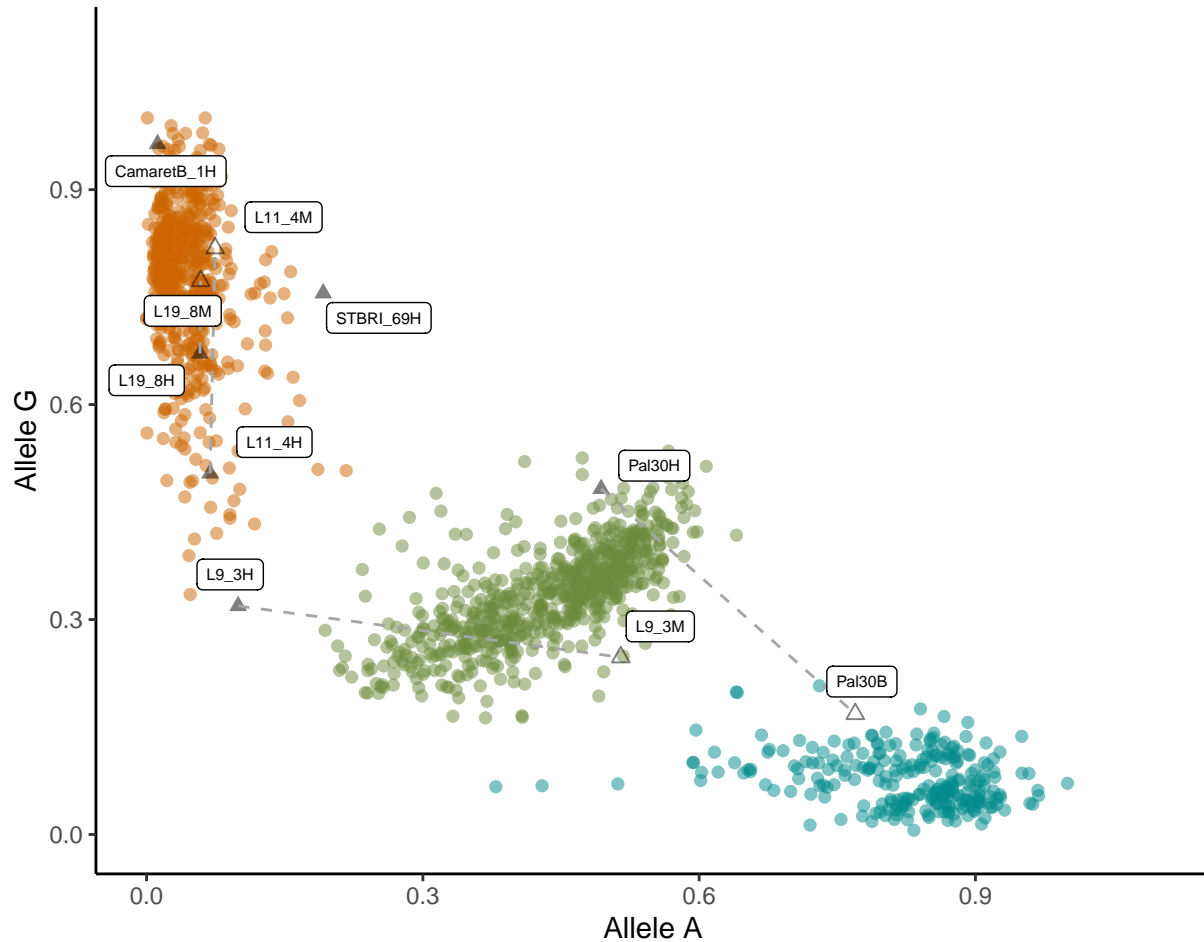

B) Correlation plot: 508-soap\_C2331\_p1911

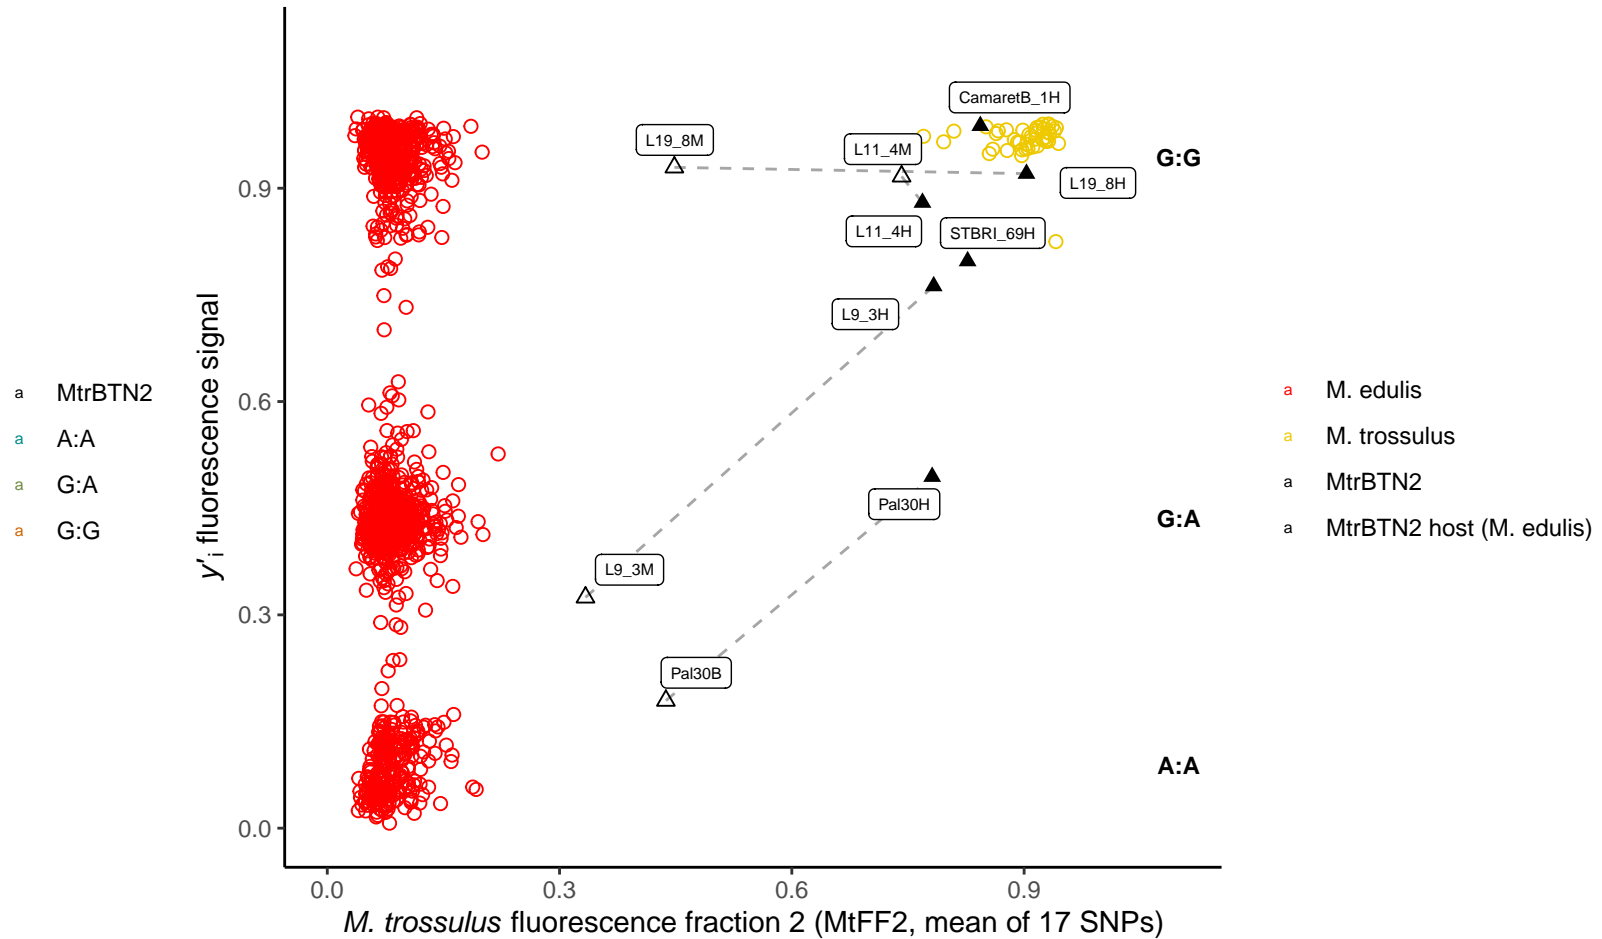

A) KASP fluorescence data plot: 080-C96364\_p474

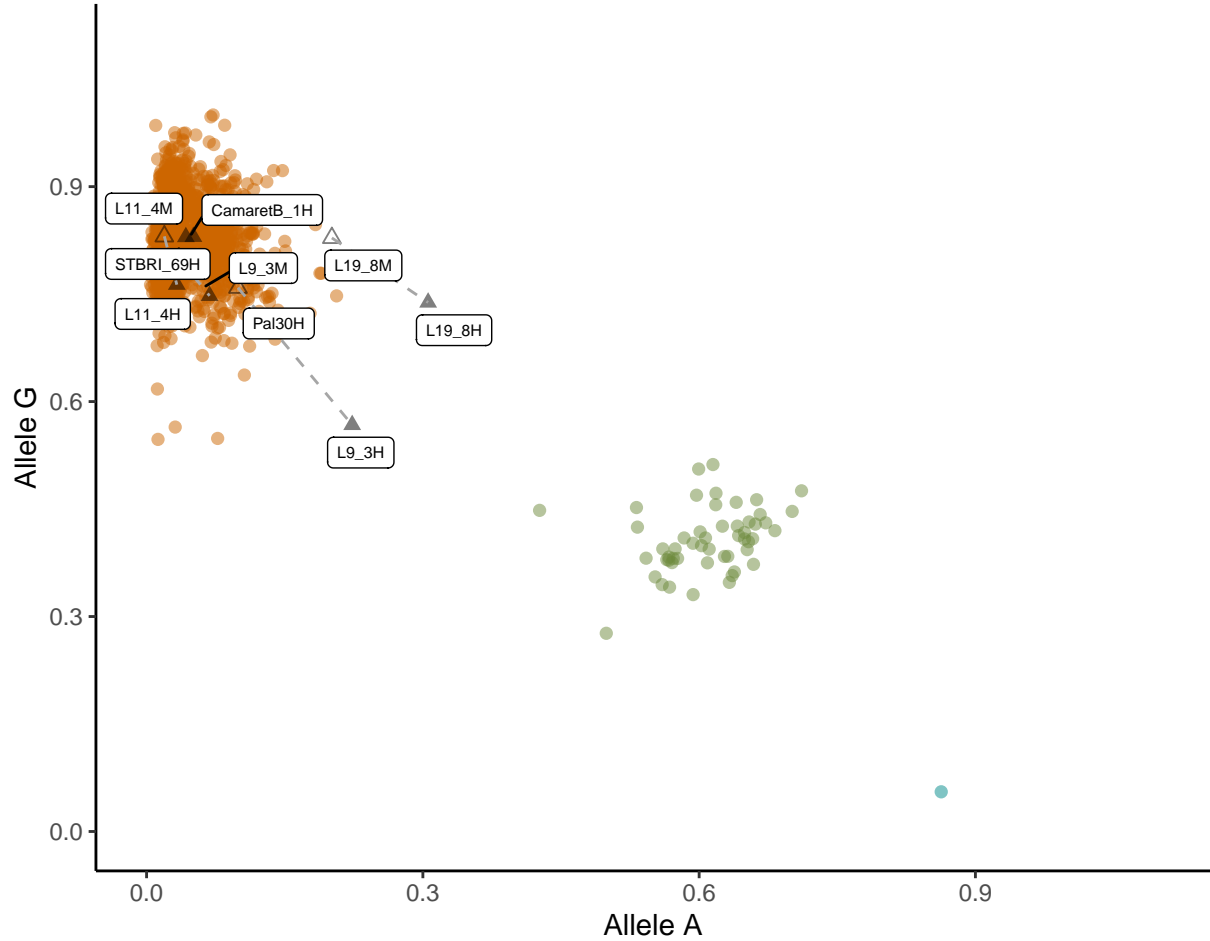

B) Correlation plot: 080-C96364\_p474

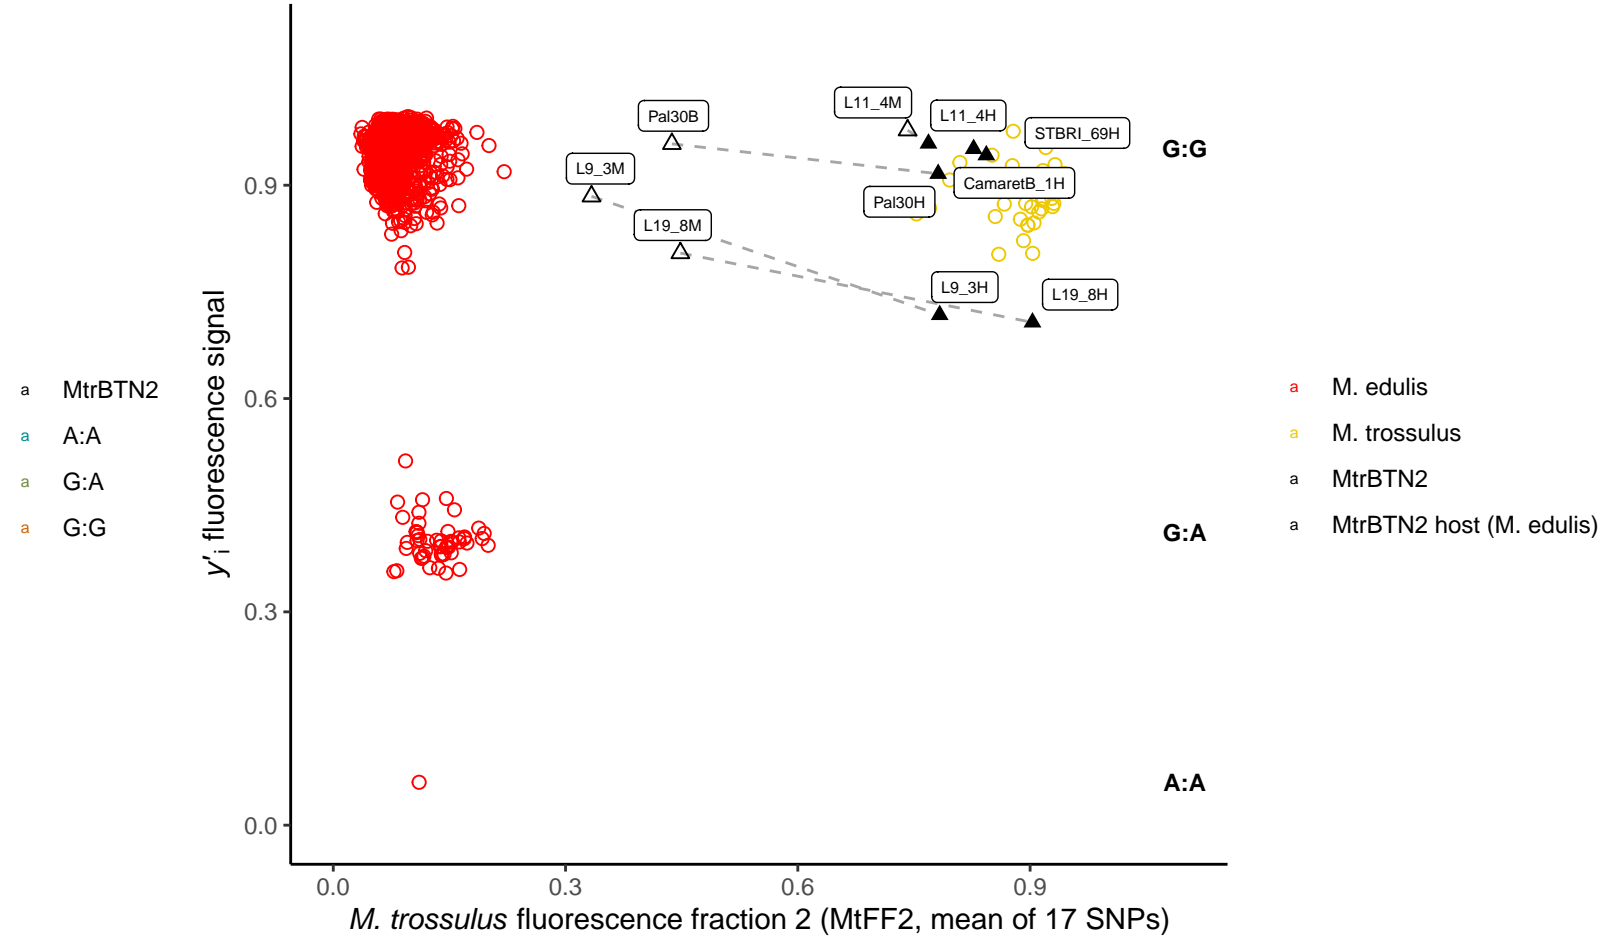



A) KASP fluorescence data plot: 155–abyss\_C477\_p4647

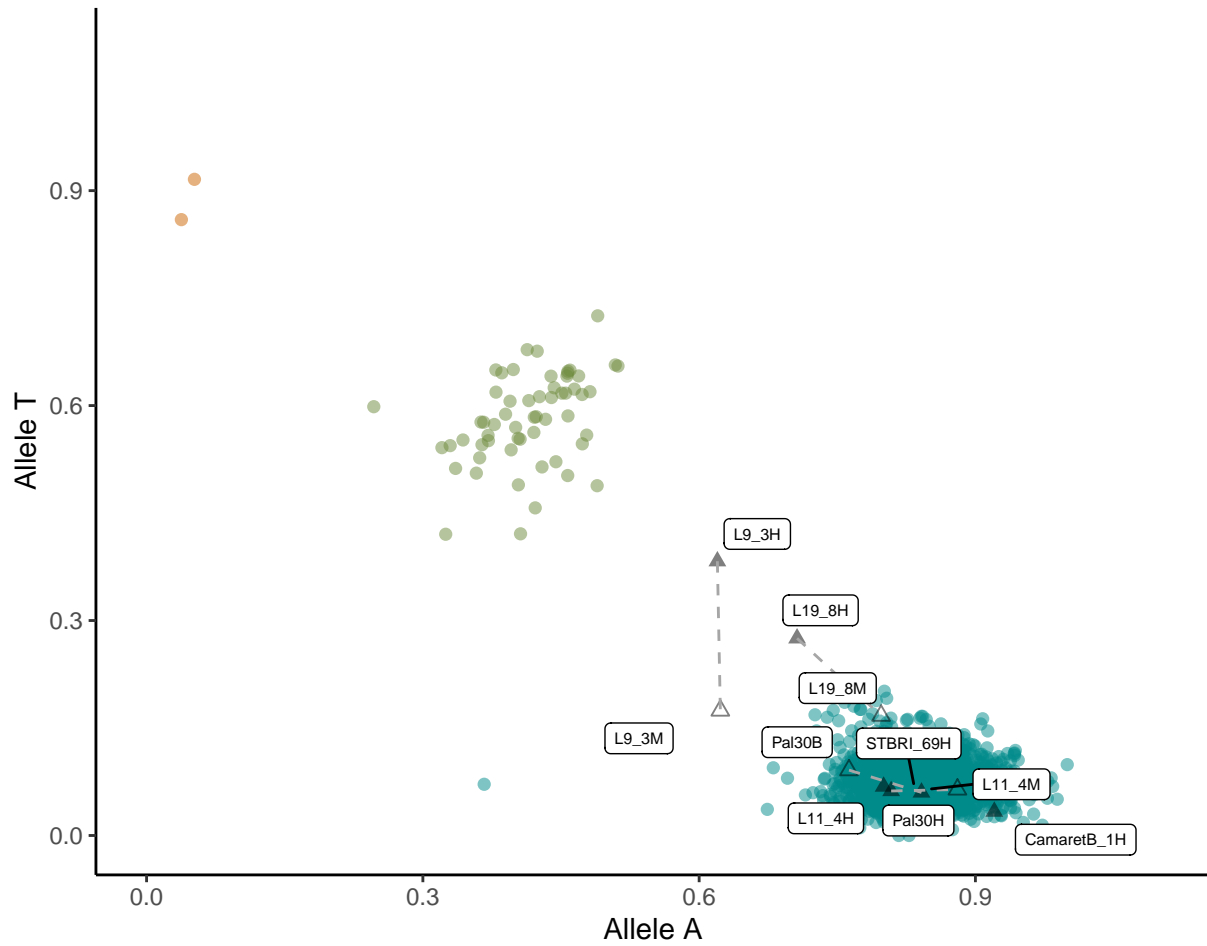

B) Correlation plot: 155–abyss\_C477\_p4647

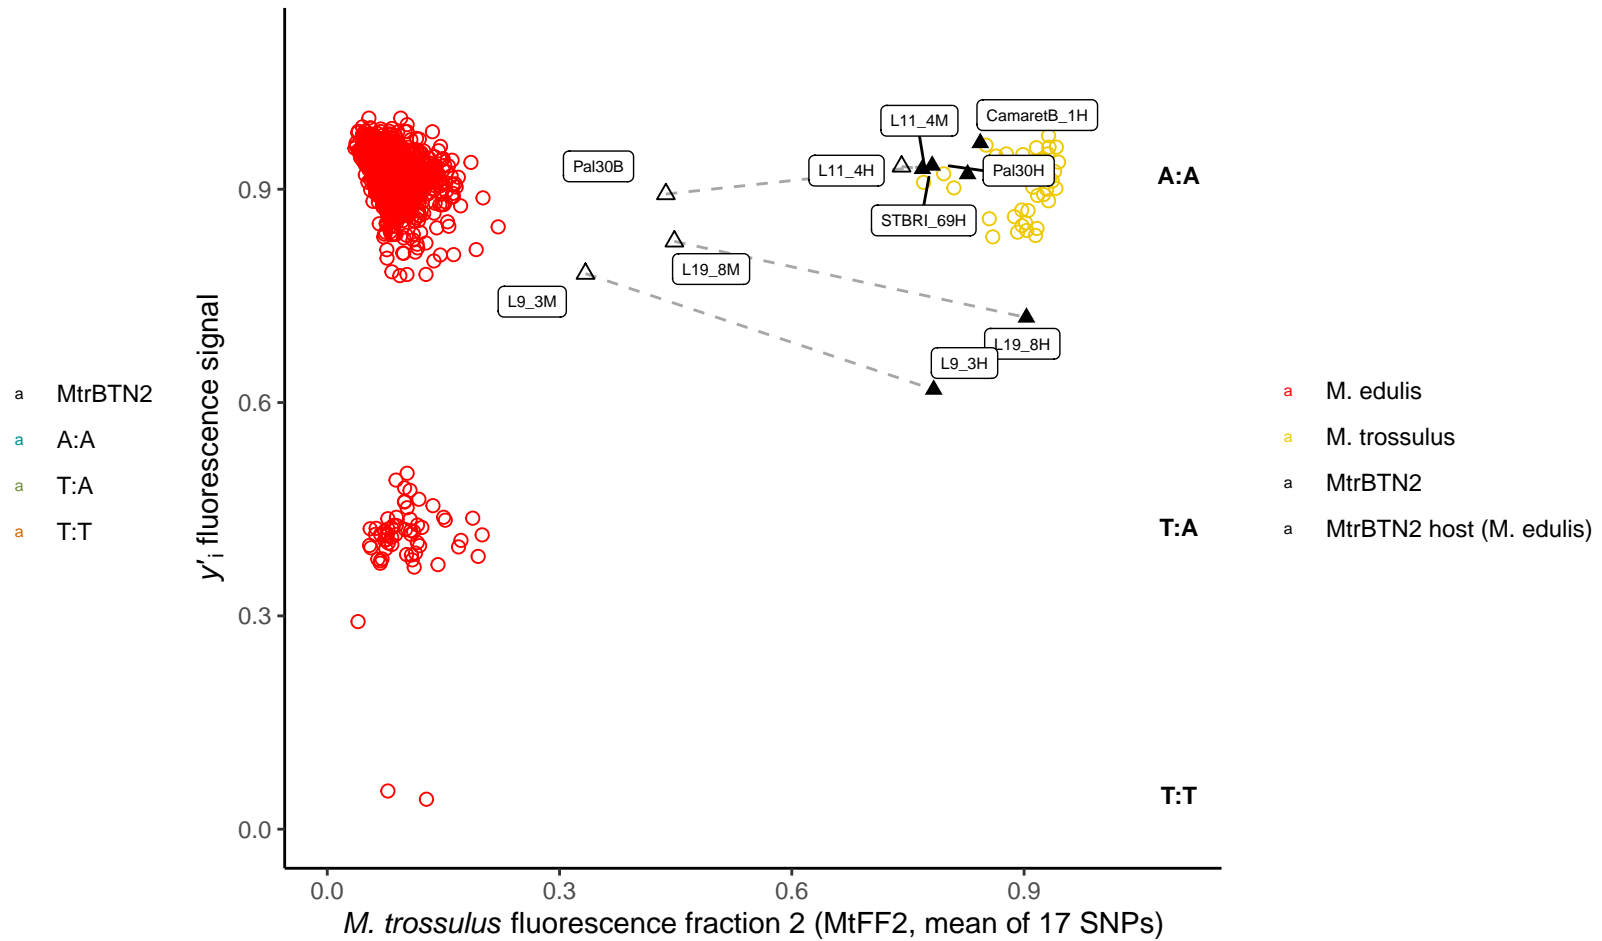

A) KASP fluorescence data plot: 180-soap\_C254\_p1675

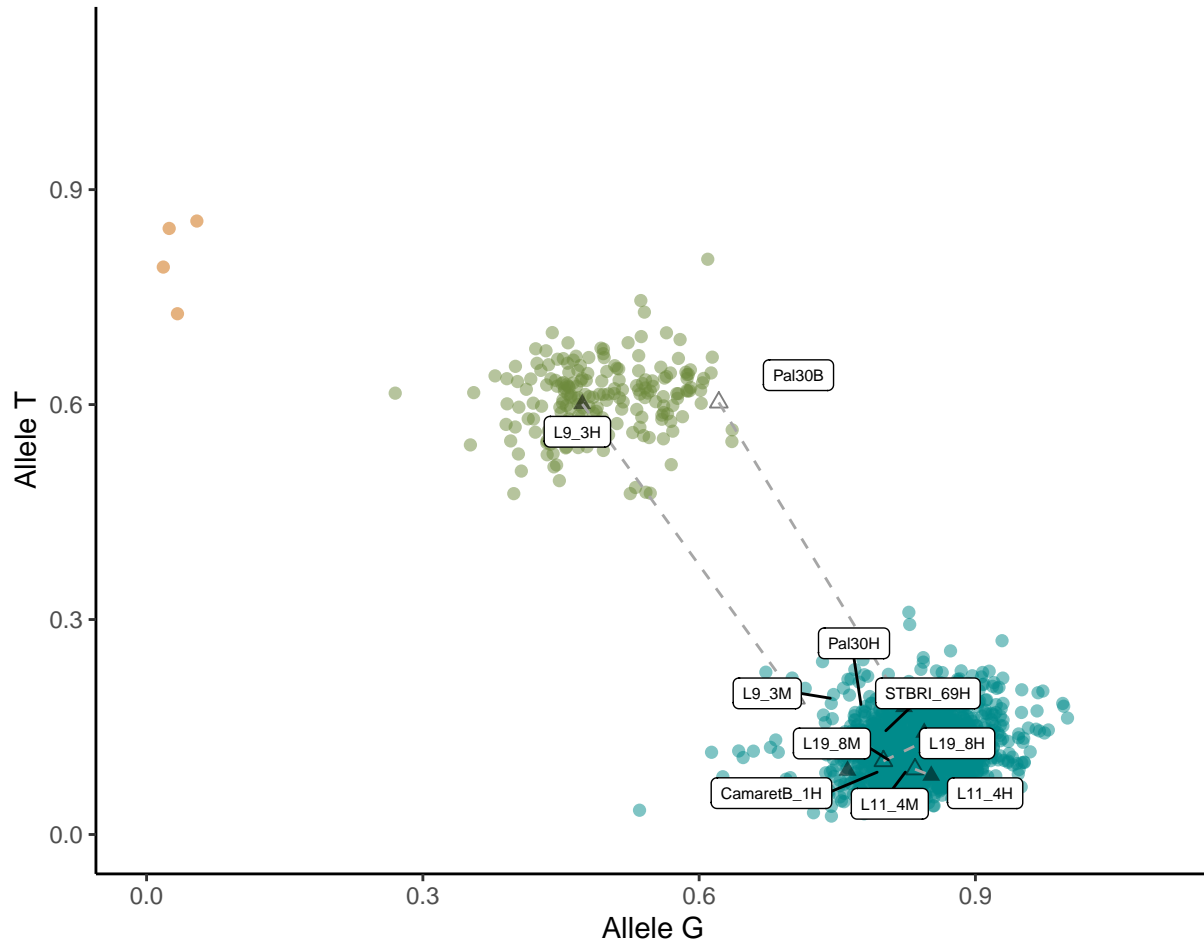

B) Correlation plot: 180-soap\_C254\_p1675

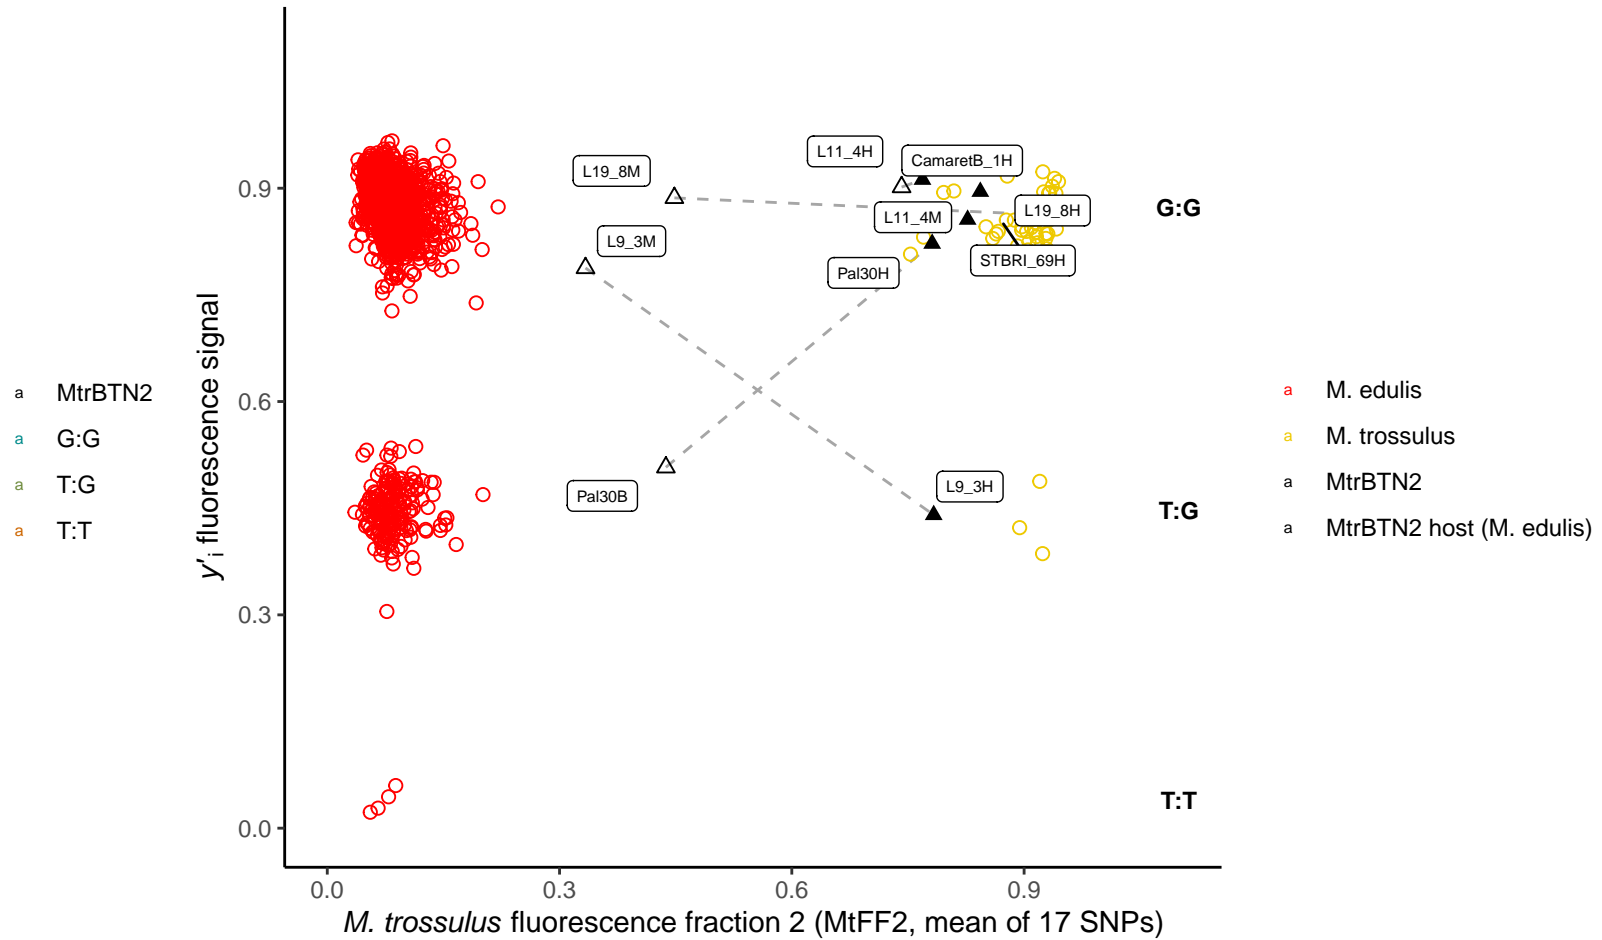

Supplement: NIHMS1736703-supplement-Figure_S1.pdf [file NIHMS1736703-supplement-Figure_S1.pdf]
