# Supplementary material
Source: PubMed Central journal article supplement (PMC8716645)
Supplement: NIHMS1736703-supplement-2.pdf [file NIHMS1736703-supplement-2.pdf]

**Supplementary Files**

**Table S1: Description of the sampled locations of *M. trossulus* references (PopRef) and *M. edulis* and *M. galloprovincialis* individuals (PopEu). Pop: population name; N: number of individuals sampled; Lat: latitude; Long: longitude; MtrBTN1: number of individuals with MtrBTN1 tumor; MtrBTN2: number of individuals with MtrBTN2, the tumor detected in this study; DNB: number of individuals with disseminated neoplasia type B (non-transmissible cancer).**

| <b>PopRef</b> | <b>N</b>  | <b>Locality</b>                                        | <b>Lat</b> | <b>Long</b> | <b>Collection_date</b> | <b>MtrBTN1</b> |
|---------------|-----------|--------------------------------------------------------|------------|-------------|------------------------|----------------|
| MtrossCB, MW  | <b>7</b>  | Copper Beach, West Vancouver, British Columbia, Canada | 49.378056  | -123.278889 |                        | <b>2</b>       |
| StLau-TD, CBD | <b>19</b> | Saint Lawrence, Cap de Bon Désir, Canada               | 48.269414  | -69.466146  | 2010                   |                |
| Gdansk        | <b>8</b>  | Gulf of Gdansk, Poland                                 | 54.609556  | 18.527944   | 23-Aug-2012            |                |

| <b>PopEu</b> | <b>N</b>  | <b>Locality</b>                     | <b>Lat</b> | <b>Long</b>  | <b>Collection_date</b> | <b>MtrBTN2</b> | <b>DNB</b> |
|--------------|-----------|-------------------------------------|------------|--------------|------------------------|----------------|------------|
| Aig          | <b>12</b> | Baie de l'Aiguillon, France         | 46.22779   | -1.176385    | 03-Apr-2017            |                |            |
| AIX_001      | <b>20</b> | Ile d'Aix, France                   | 46.04045   | -1.205566667 | 30-Nov-2016            |                |            |
| AR           | <b>21</b> | Ares, Galicia, Spain                | 43.418517  | -8.240612    |                        |                |            |
| Arc          | <b>74</b> | Arcachon la Vigne, France           | 44.67145   | -1.238366    | 28-Nov-2016            | <b>1</b>       |            |
| AUN_001      | <b>21</b> | Rocher d'Aunis, France              | 46.33305   | -1.4268      | 07-Nov-2016            | <b>2</b>       |            |
| B_amont      | <b>14</b> | Bassin Amont, Le Havre, France      | 49.47124   | 0.14587      |                        |                |            |
| B_aval       | <b>15</b> | Bassin Aval, Le Havre, France       | 49.47447   | 0.13242      |                        |                |            |
| Barf         | <b>29</b> | Barfleur, France                    | 49.71015   | -1.258066667 | 2015                   | <b>1</b>       |            |
| BD           | <b>72</b> | Bude, SW England, UK                | 50.831278  | -4.557036    |                        |                |            |
| BDC          | <b>30</b> | Bois-de-Cise, France                | 50.0906    | 1.422817     | 2016                   |                |            |
| BER          | <b>30</b> | Berck, France                       | 50.429867  | 1.559517     | 2016                   |                |            |
| BES          | <b>29</b> | Port en Bessin, France              | 49.351067  | -0.753603    | 2016                   |                |            |
| BIA_001      | <b>45</b> | Digue de Marbella, Biarritz, France | 43.467448  | -1.576547    | 14-Dec-2016            |                |            |
| BIL_001      | <b>21</b> | Le Bile - Penestin, France          | 47.445281  | -2.490151    | 11-Jan-2017            |                |            |
| BIL1         | <b>10</b> | Zierbena, Bilbao harbor, Spain      | 43.35194   | -3.081244    | 17-Jul-2017            |                |            |
| BIL2         | <b>5</b>  | Zierbena, Bilbao harbor, Spain      | 43.352619  | -3.079388    | 17-Jul-2017            |                |            |

|          |           |                                   |             |             |             |
|----------|-----------|-----------------------------------|-------------|-------------|-------------|
| BIL3     | <b>11</b> | Santurtzi, Bilbao harbor, Spain   | 43.330654   | -3.030497   | 17-Jul-2017 |
| BIL4     | <b>12</b> | Santurtzi, Bilbao harbor, Spain   | 43.330435   | -3.029756   | 17-Jul-2017 |
| BIL5     | <b>8</b>  | Portugalete, Bilbao harbor, Spain | 43.325567   | -3.020627   | 17-Jul-2017 |
| BIL6     | <b>12</b> | Getxo, Bilbao harbor, Spain       | 43.33165    | -3.013022   | 20-Jul-2017 |
| BIL7     | <b>11</b> | Getxo, Bilbao harbor, Spain       | 43.341866   | -3.027535   | 20-Jul-2017 |
| Bizerte  | <b>11</b> | Bizerte, Tunisia                  | 37.26       | 9.86        |             |
| BLYT     | <b>5</b>  | Blythe, North Sea                 | 55.1258     | -1.4983     | 14-Nov-2014 |
| Brest-1  | <b>12</b> | Lagonna Daoulas, France           | 48.31668614 | -4.28627923 | 08-Jul-2017 |
| Brest-10 | <b>12</b> | Fishing dock, Camaret, France     | 48.275207   | -4.587984   | 09-Jul-2017 |
| Brest-11 | <b>12</b> | Camaret marina, France            | 48.279722   | -4.597133   | 09-Jul-2017 |
| Brest-12 | <b>12</b> | Veryac'h, France                  | 48.261525   | -4.61044    | 09-Jul-2017 |
| Brest-13 | <b>12</b> | Morgat marina, France             | 48.223575   | -4.49673    | 09-Jul-2017 |
| Brest-14 | <b>12</b> | Postolonnec beach, France         | 48.23806    | -4.463427   | 09-Jul-2017 |
| Brest-15 | <b>12</b> | Porz Tinduff, France              | 48.3379     | -4.369133   | 24-Jul-2017 |
| Brest-16 | <b>12</b> | Lauberlac'h, France               | 48.336583   | -4.413974   | 24-Jul-2017 |
| Brest-17 | <b>12</b> | Anse du Caro, France              | 48.3437     | -4.44185    | 24-Jul-2017 |
| Brest-18 | <b>12</b> | Pointe Marloux, France            | 48.35935    | -4.437233   | 24-Jul-2017 |
| Brest-19 | <b>12</b> | Marina Moulin Blanc Nord, France  | 48.393133   | -4.430667   | 24-Jul-2017 |
| Brest-2  | <b>12</b> | Lanvéoc, France                   | 48.293339   | -4.453667   | 08-Jul-2017 |
| Brest-20 | <b>9</b>  | Marina Moulin Blanc Sud, France   | 48.390017   | -4.432483   | 24-Jul-2017 |
| Brest-21 | <b>12</b> | Brest commerce A, France          | 48.379945   | -4.47392    | 25-Jul-2017 |
| Brest-22 | <b>11</b> | Brest commerce B, France          | 48.382805   | -4.473206   | 25-Jul-2017 |
| Brest-23 | <b>11</b> | Brest commerce C, France          | 48.377616   | -4.4811     | 25-Jul-2017 |
| Brest-24 | <b>10</b> | Pointe de l'Armorique, France     | 48.32235    | -4.453483   | 25-Jul-2017 |
| Brest-25 | <b>12</b> | Anse de Sainte-Anne, France       | 48.359449   | -4.551021   | 25-Jul-2017 |
| Brest-26 | <b>12</b> | Pointe du Porzic Est, France      | 48.3601167  | -4.5292333  | 25-Jul-2017 |
| Brest-27 | <b>12</b> | Marina du Chateau A, France       | 48.3773167  | -4.4909333  | 25-Jul-2017 |
| Brest-28 | <b>10</b> | Marina du Chateau B, France       | 48.3801833  | -4.4889167  | 25-Jul-2017 |
| Brest-29 | <b>12</b> | Brest commerce D, France          | 48.374702   | -4.455849   | 25-Jul-2017 |
| Brest-3  | <b>12</b> | Le Fret, France                   | 48.28444234 | -4.50891043 | 08-Jul-2017 |

|          |           |                                     |           |           |             |
|----------|-----------|-------------------------------------|-----------|-----------|-------------|
| Brest-30 | <b>12</b> | Le Conquet, France                  | 48.359043 | -4.781042 | 27-Jul-2017 |
| Brest-31 | <b>12</b> | Penzer, France                      | 48.343054 | -4.77214  | 27-Jul-2017 |
| Brest-32 | <b>12</b> | Pointe Saint-Mathieu, France        | 48.328467 | -4.7682   | 27-Jul-2017 |
| Brest-33 | <b>12</b> | Plougonvelin, France                | 48.338883 | -4.69895  | 27-Jul-2017 |
| Brest-34 | <b>12</b> | Petit Minou, France                 | 48.337583 | -4.615383 | 27-Jul-2017 |
| Brest-35 | <b>12</b> | Le Mengant, France                  | 48.34809  | -4.58137  | 27-Jul-2017 |
| Brest-36 | <b>12</b> | Térénez, France                     | 48.279823 | -4.268145 | 05-Aug-2017 |
| Brest-37 | <b>12</b> | Ile Vierge, France                  | 48.200699 | -4.514774 | 06-Aug-2017 |
| Brest-38 | <b>7</b>  | Elorn 2, France                     | 48.40575  | -4.340483 | 21-Sep-2017 |
| Brest-39 | <b>11</b> | Elorn 2B, France                    | 48.405817 | -4.343167 | 21-Sep-2017 |
| Brest-4  | <b>12</b> | L'île du Renard, France             | 48.291942 | -4.539967 | 08-Jul-2017 |
| Brest-40 | <b>11</b> | Elorn St Jean, France               | 48.40385  | -4.348983 | 21-Sep-2017 |
| Brest-41 | <b>9</b>  | Elorn 3, France                     | 48.406483 | -4.356117 | 21-Sep-2017 |
| Brest-42 | <b>12</b> | Elorn 6, France                     | 48.39705  | -4.372083 | 21-Sep-2017 |
| Brest-43 | <b>12</b> | Elorn 9, France                     | 48.395533 | -4.3828   | 21-Sep-2017 |
| Brest-44 | <b>12</b> | Elorn 11, France                    | 48.393    | -4.38205  | 21-Sep-2017 |
| Brest-45 | <b>12</b> | Elorn 14, France                    | 48.392983 | -4.3867   | 21-Sep-2017 |
| Brest-46 | <b>12</b> | Elorn 15, France                    | 48.390283 | -4.39465  | 21-Sep-2017 |
| Brest-5  | <b>12</b> | Roscanvel, France                   | 48.3146   | -4.545065 | 08-Jul-2017 |
| Brest-6  | <b>12</b> | La Fraternité, France               | 48.307103 | -4.572997 | 08-Jul-2017 |
| Brest-7  | <b>12</b> | Quelern, France                     | 48.296583 | -4.554522 | 09-Jul-2017 |
| Brest-8  | <b>6</b>  | Pointe des Espagnols, France        | 48.339737 | -4.532071 | 09-Jul-2017 |
| Brest-9  | <b>12</b> | Lot des Capucins, France            | 48.318344 | -4.582539 | 09-Jul-2017 |
| BretN_g1 | <b>10</b> | venizella, Guimaec, France          | 48.700138 | -3.71707  | 24-May-2016 |
| BretN_g2 | <b>10</b> | Poul Roudou, Locquirec, France      | 48.689997 | -3.698187 | 24-May-2016 |
| BretN_g3 | <b>10</b> | Lezingar, Locquirec, France         | 48.687957 | -3.676901 | 24-May-2016 |
| BretN_g4 | <b>10</b> | Pors ar villiec, Locquirec          | 48.694813 | -3.646431 | 24-May-2016 |
| BretN_i1 | <b>9</b>  | Léguer estuary, South point, France | 48.728634 | -3.546384 | 24-May-2016 |
| BretN_i2 | <b>10</b> | Banc du Guer sud, France            | 48.728948 | -3.542295 | 24-May-2016 |
| BretN_i3 | <b>10</b> | Locquémo, France                    | 48.721388 | -3.581562 | 24-May-2016 |

|            |    |                                            |            |             |             |   |
|------------|----|--------------------------------------------|------------|-------------|-------------|---|
| BretN_i4   | 10 | Locquemo, France                           | 48.726078  | -3.583713   | 24-May-2016 |   |
| BretN_i5q1 | 10 | Beg ar form, Saint-Michel en Grève, France | 48.688861  | -3.582827   | 24-May-2016 |   |
| BretN_i5q2 | 10 | Beg ar form, Saint-Michel en Grève, France | 48.689137  | -3.582707   | 24-May-2016 |   |
| BretN_i6   | 10 | Beg Douar, Plestin Les Grèves, France      | 48.685065  | -3.617125   | 24-May-2016 |   |
| BretN_i8   | 9  | Roc'h Goalen, Plougasnou, France           | 48.723045  | -3.804249   | 24-May-2016 |   |
| Brv        | 63 | Bréville-sur-Mer, France                   | 48.854168  | -1.5868876  | 12-Jun-2017 | 5 |
| CAD        | 14 | Cadix, Spain                               | 36.52719   | -6.29842    | 2016        |   |
| CamaretA   | 1  | Camaret, La Plaine sur Mer, France         |            |             | 01-Aug-2017 | 1 |
| CamaretB   | 1  | Camaret, La Plaine sur Mer, France         |            |             | 24-Oct-2017 | 1 |
| CAP        | 30 | Capbreton West, France                     | 43.65525   | -1.4454     | 2016        |   |
| CB         | 72 | Carlyon Bay, SW England, UK                | 50.33204   | -4.744566   |             |   |
| CER_001    | 24 | Brest port, France                         | 48.38265   | -4.448869   | 14-Dec-2016 |   |
| CHA_OLE    | 19 | Chassiron, Oléron, France                  | 45.050357  | -1.41515    | 03-Oct-2016 |   |
| Chausey    | 14 | Chausey archipelago, France                | 48.884236  | -1.806773   | 2009        | 2 |
| CHE        | 30 | Pointe de Chemoulin, France                | 47.232317  | -2.29965    | 2016        |   |
| CHE_001    | 25 | Cherbourg, France                          | 49.645741  | -1.623364   | 02-Dec-2016 |   |
| Cher-A     | 12 | Cherbourg A, France                        | 49.6453    | -1.61953    | 01-Aug-2017 |   |
| Cher-B     | 12 | Cherbourg B, France                        | 49.64956   | -1.61981    | 01-Aug-2017 |   |
| Cher-C     | 12 | Cherbourg C, France                        | 49.67307   | -1.63244    | 01-Aug-2017 |   |
| Cher-D     | 11 | Cherbourg D, France                        | 49.64818   | -1.6202     | 01-Aug-2017 |   |
| Cher-E     | 11 | Cherbourg E, France                        | 49.64208   | -1.6208     | 01-Aug-2017 |   |
| Cher-F     | 9  | Cherbourg F, France                        | 49.64566   | -1.62342    | 01-Aug-2017 |   |
| Cher-G     | 8  | Cherbourg G, France                        | 49.63846   | -1.61964    | 01-Aug-2017 |   |
| Collo      | 1  | Collo, Algeria                             | 37         | 6.56        |             |   |
| COR        | 15 | Coruña, Galicia, Spain                     | 43.37011   | -8.41393    | 2016        |   |
| CR         | 87 | Croyde, SW ENgland, UK                     | 51.124105  | -4.246137   |             |   |
| CRE        | 15 | Praia do Creio, Arràjbida, Spain           | 38.48047   | -8.9739     | 2016        |   |
| Croa       | 12 | Croatia                                    | 45.071553  | 13.620913   |             | 1 |
| D15A       | 4  | D15-A, North Sea                           | 54.3247    | 2.9346      | 03-Oct-2015 |   |
| Dieppe     | 12 | Dieppe, France                             | 49.9355556 | 1.096702778 |             |   |

|         |           |                                 |           |           |             |
|---------|-----------|---------------------------------|-----------|-----------|-------------|
| Dun     | <b>30</b> | Dunkerque, France               | 51.103133 | 2.421783  | 2016        |
| ES      | <b>30</b> | Esbjerg, Denmark                | 55.486617 | 8.404019  | 07-Oct-2016 |
| EST_001 | <b>24</b> | Le Croisic, France              | 47.3037   | -2.5337   |             |
| FAR     | <b>14</b> | Faro, Portugal                  | 37.01568  | -7.93884  | 2016        |
| FIL     | <b>30</b> | Filières Pertuis Breton, France | 46.2715   | -1.3816   | 30-Nov-2016 |
| FINO    | <b>2</b>  | FINO 3, North Sea               | 55.195    | 7.1583    | 23-Sep-2015 |
| FIO_001 | <b>24</b> | Le Fiol, France                 |           |           |             |
| Fiol    | <b>16</b> | Le Fiol, France                 | 47.028019 | -2.01954  |             |
| FRE     | <b>30</b> | Baie de la Fresnaye, France     | 48.645278 | -2.297917 | 2016        |
| FWB_001 | <b>18</b> | Filière Pertuis Breton, France  | 46.27151  | -1.381558 | 30-Nov-2016 |
| FZ      | <b>21</b> | Areoura-Foz, Galicia, Spain     | 43.640907 | -7.342928 |             |
| GR      | <b>47</b> | La Guérinière, France           | 46.960672 | -2.229642 | 15-Fev-2017 |
| HA      | <b>30</b> | Hanstholm, Denmark              | 57.122231 | 8.637481  | 27-Sep-2016 |
| HARW    | <b>10</b> | Harwich, North Sea              | 51.9348   | 1.2813    | 15-Nov-2015 |
| Havre-J | <b>12</b> | Le Havre, France                | 49.488933 | 0.118317  | 02-Jul-2017 |
| Havre_A | <b>15</b> | Le Havre, France                | 49.48586  | 0.11327   | 2016        |
| Havre_B | <b>15</b> | Le Havre, France                | 49.47316  | 0.11612   | 2016        |
| Havre_C | <b>15</b> | Le Havre, France                | 49.47     | 0.12268   | 2016        |
| Havre_D | <b>15</b> | Le Havre, France                | 49.46841  | 0.13867   | 2016        |
| Havre_E | <b>15</b> | Le Havre, France                | 49.46831  | 0.15604   | 2016        |
| Havre_F | <b>15</b> | Le Havre, France                | 49.47585  | 0.15841   | 2016        |
| Havre_G | <b>15</b> | Le Havre, France                | 49.47242  | 0.17341   | 2016        |
| Havre_H | <b>15</b> | Le Havre, France                | 49.48713  | 0.09767   | 2016        |
| Havre_I | <b>15</b> | Le Havre, France                | 49.45401  | 0.1651    | 2016        |
| Her     | <b>11</b> | Heraklion, Greece               | 35.338    | 25.1442   |             |
| HI      | <b>30</b> | Hirtshals, Denmark              | 57.595653 | 9.957281  | 26-Sep-2016 |
| HJ      | <b>30</b> | Hjerpsted, Denmark              | 55.027447 | 8.636378  | 07-Oct-2016 |
| Holl    | <b>23</b> | Wadden Sea, The Netherlands     | 53.31     | 5.424     | 2009        |
| HORN    | <b>2</b>  | Horns Rev, North Sea            | 55.4789   | 7.811     | 10-Jun-2015 |
| HOS_001 | <b>25</b> | Hossegore canal, France         | 43.655537 | -1.439209 | 15-Dec-2016 |

1

|             |            |                                                                            |             |              |             |          |
|-------------|------------|----------------------------------------------------------------------------|-------------|--------------|-------------|----------|
| HOU_001     | <b>23</b>  | Ile de Houat, France                                                       | 47.419667   | -2.937233    | 10-Jan-2017 |          |
| HV          | <b>30</b>  | Hvide Sande, Denmark                                                       | 56.003664   | 8.127828     | 11-Sep-2016 |          |
| HyC         | <b>3</b>   | putative "hybrid" from Croyde, again based on some morphological features. |             |              |             |          |
| HYC         | <b>8</b>   | putative "hybrid" from Croyde, again based on some morphological features. |             |              |             |          |
| Jer         | <b>30</b>  | JER, Jersey, France                                                        | 49.173083   | -2.020383    | 2016        |          |
| JOS         | <b>32</b>  | Baie de St Brieuc, France                                                  | 48.558056   | -2.600278    | 30-Nov-2016 |          |
| JUM         | <b>30</b>  | La Jument, France                                                          | 47.833972   | -3.900439    | 2016        |          |
| K10B        | <b>6</b>   | K10-B, North Sea                                                           | 53.3626     | 3.2539       | 01-Oct-2014 |          |
| KER         | <b>27</b>  | Keruel, France                                                             | 48.11565    | -4.28515     | 2016        |          |
| L1          | <b>26</b>  | Lannion, France                                                            | 48.7457     | -3.590067    | 24-Fev-2017 |          |
| L10         | <b>39</b>  | Bay of Brest, France                                                       | 48.34033399 | -4.315824509 | 29-May-2017 |          |
| L10G        | <b>11</b>  | L10-G, North Sea                                                           | 53.4904     | 4.1952       | 08-Jun-2014 |          |
| L11         | <b>35</b>  | Arguenon, France                                                           | 48.606406   | -2.219304    | 29-May-2017 | <b>1</b> |
| L12         | <b>42</b>  | Saint-Brieuc, France                                                       | 48.557029   | -2.722984    | 28-May-2017 |          |
| L13         | <b>38</b>  | Saint-Brieuc, France                                                       | 48.55022263 | -2.647404671 | 28-May-2017 |          |
| L14         | <b>45</b>  | La Fresnaye, France                                                        | 48.639603   | -2.286075    | 29-May-2017 |          |
| L15         | <b>43</b>  | Le vivier-sur-mer, France                                                  | 48.638800   | 1.7258       | 29-May-2017 |          |
| L16         | <b>71</b>  | Bay of Brest, France                                                       | 48.34033399 | -4.315824509 | 20-Sep-2017 |          |
| L17         | <b>47</b>  | Pénestin                                                                   | 47.436261   | -2.474544    |             |          |
| L18.L19.L20 | <b>122</b> | Lannion, France                                                            | 48.7457     | -3.590067    | 03-Oct-2017 | <b>3</b> |
| L2          | <b>22</b>  | Saint-Brieuc, France                                                       | 48.55022263 | -2.647404671 | 27-Fev-2017 |          |
| L3          | <b>31</b>  | Bay of Brest, France                                                       | 48.34033399 | -4.315824509 | 27-Fev-2017 |          |
| L4          | <b>38</b>  | Bay of Brest (Camaret), France                                             | 48.2822     | -4.5723      | 24-Apr-2017 |          |
| L5          | <b>43</b>  | Bay of Brest (port), France                                                | 48.377327   | -4.488155    | 24-Apr-2017 |          |
| L6          | <b>45</b>  | Bay of Brest, France                                                       | 48.34033399 | -4.315824509 | 24-Apr-2017 | <b>8</b> |
| L7          | <b>40</b>  | Aber Wrac'h, France                                                        | 48.587646   | -4.502225    | 24-Apr-2017 |          |
| L8          | <b>37</b>  | Saint-Brieuc, France                                                       | 48.55022263 | -2.647404671 | 24-Apr-2017 |          |
| L9          | <b>31</b>  | Lannion, France                                                            | 48.7457     | -3.590067    | 17-May-2017 | <b>1</b> |

|         |           |                                                                                |           |           |             |          |
|---------|-----------|--------------------------------------------------------------------------------|-----------|-----------|-------------|----------|
| LAN-VIV | <b>4</b>  | Lannion, France                                                                | 48.7457   | -3.590067 | 26-Jul-2017 | <b>1</b> |
| LaRochA | <b>2</b>  | La Rochelle, France                                                            | 46.14988  | -1.22359  | 24-Jun-2017 |          |
| LaRochB | <b>26</b> | La Rochelle, France                                                            | 46.15045  | -1.22449  | 25-Jun-2017 |          |
| LeHaCM  | <b>14</b> | Le Havre, France                                                               | 49.457252 | 0.113797  | 2017        |          |
| LeHaP1  | <b>15</b> | Le Havre P1, France                                                            | 49.464664 | 0.105794  | 2017        |          |
| LeHaP10 | <b>14</b> | Le Havre P10, France                                                           | 49.453519 | 0.173317  | 2017        |          |
| LeHaP11 | <b>12</b> | Le Havre P11, France                                                           | 49.454564 | 0.178067  | 2017        |          |
| LeHaP2  | <b>15</b> | Le Havre P2, France                                                            | 49.460397 | 0.109964  | 2017        |          |
| LeHaP3  | <b>15</b> | Le Havre P3, France                                                            | 49.45825  | 0.114733  | 2017        |          |
| LeHaP4  | <b>15</b> | Le Havre P4, France                                                            | 49.457344 | 0.121375  | 2017        |          |
| LeHaP5  | <b>12</b> | Le Havre P5, France                                                            | 49.456344 | 0.133297  | 2017        |          |
| LeHaP6  | <b>15</b> | Le Havre P6, France                                                            | 49.455464 | 0.144133  | 2017        |          |
| LeHaP7  | <b>15</b> | Le Havre P7, France                                                            | 49.451853 | 0.152244  | 2017        |          |
| LeHaP8  | <b>14</b> | Le Havre P8, France                                                            | 49.454406 | 0.160153  | 2017        |          |
| LeHaP9  | <b>14</b> | Le Havre P9, France                                                            | 49.453764 | 0.166017  | 2017        |          |
| LISB    | <b>2</b>  | Lisbon, Portugal                                                               | 38.7635   | -9.0926   | 14-Fev-2015 |          |
| LRM     | <b>1</b>  | Charente, France                                                               |           |           |             |          |
| LX      | <b>21</b> | Laxe, Galicia, Spain                                                           | 43.225475 | -9.00258  |             |          |
| MA      | <b>37</b> | Mandà,, Denmark                                                                | 55.308394 | 8.647261  | 07-Oct-2016 |          |
| MAB_001 | <b>23</b> | Maison Blanche, Noirmoutier, France                                            | 46.9976   | -2.2161   |             |          |
| MAK     | <b>5</b>  | Makrigiallos, Greece                                                           | 40.416178 | 22.612317 |             |          |
| MB      | <b>30</b> | Maison Blanche, Noirmoutier, France                                            | 46.995944 | -2.156211 | 15-Fev-2017 |          |
| MB1     | <b>35</b> | Pertuis Antioche, France                                                       | 46.037037 | -1.097191 | 08-Sep-2015 |          |
| MB10    | <b>10</b> | Pertuis Antioche, Pont ile Oleron, pile de pont, France                        | 45.853482 | -1.181018 | 24-Jun-2016 |          |
| MB11    | <b>9</b>  | Pertuis Antioche, secteur Boyard parc bouchot, France                          | 45.958675 | -1.222794 | 24-Jun-2016 |          |
| MB12    | <b>4</b>  | Pertuis breton, Loix en Ré, France                                             | 46.22498  | -1.410844 | 08-Jul-2016 |          |
| MB13    | <b>15</b> | Pertuis Antioche, Haut de Seudre amont, site Chaillevette, rive droite, France | 45.734098 | -1.040098 | 18-Jul-2016 |          |



|         |           |                                                                                |           |           |             |
|---------|-----------|--------------------------------------------------------------------------------|-----------|-----------|-------------|
| MB14    | <b>29</b> | Site Charente estuaire amont Charente rive gauche -Fontaine Lupin, France      | 45.952699 | -1.053588 | 02-Aug-2016 |
| MB15    | <b>30</b> | Pontillac, la vigie, France                                                    | 45.623043 | -1.052778 | 22-Aug-2016 |
| MB16    | <b>16</b> | Penestin (56) rive gauche estuaire Vilaine, France                             | 47.494045 | -2.454079 | 13-Sep-2016 |
| MB2.MB3 | <b>25</b> | Pertuis Breton , AIGUILLO, France                                              | 46.268644 | -1.233045 | 06-Apr-2016 |
| MB4     | <b>8</b>  | FILIERE pertuis Breton, France                                                 | 46.278149 | -1.376951 | 06-Apr-2016 |
| MB5     | <b>11</b> | ROULIERES pertuis Breton, France                                               | 46.30889  | -1.323108 | 06-Apr-2016 |
| MB6     | <b>30</b> | Pertuis breton, estuaire du Lay, Le Lay pieux, France                          | 46.296875 | -1.271754 | 21-Jun-2016 |
| MB7     | <b>30</b> | Pertuis breton, estuaire Sèvre Niortaise, Haut Sèvre, Bouée N°7, France        | 46.270652 | -1.178486 | 21-Jun-2016 |
| MB8     | <b>16</b> | Pertuis breton, Port de la Rochelle, Mâ'le escale, France                      | 46.159085 | -1.241392 | 21-Jun-2016 |
| MB9     | <b>15</b> | Large pertuis Maumusson, Bouée Phares balise Maumusson "atterisage", France    | 45.782586 | -1.279318 | 22-Jun-2016 |
| mbitter | <b>40</b> | Mediterranean Sea, Thau + Point near Villefranche, France                      |           |           |             |
| ME      | <b>22</b> | M. edulis from Swansea, UK                                                     |           |           |             |
| MeC     | <b>4</b>  | putative Edulis from Croyde pop, UK                                            |           |           |             |
| MEC     | <b>2</b>  | putative Edulis from Croyde pop, UK                                            |           |           |             |
| Mg      | <b>22</b> | M. galloprovincialis from Vigo, Spain                                          |           |           |             |
| MgC     | <b>26</b> | putative Gallo from Croyde pop initially based on some morphology features, UK |           |           |             |
| MN      | <b>21</b> | Marin, Galicia, Spain                                                          | 42.393865 | -8.714087 |             |
| MOG_001 | <b>23</b> | Moguéric (Aber), France                                                        | 48.688292 | -4.070776 | 18-Nov-2016 |
| MOG_001 | <b>15</b> | Moguéric (Aber), France                                                        | 48.688293 | -4.070777 |             |
| MOU     | <b>30</b> | Pointe de Moustierlin, France                                                  | 47.842817 | -4.041867 | 2016        |
| MP      | <b>21</b> | Malpica, Galicia, Spain                                                        | 43.32606  | -8.80175  |             |
| OLE_PON | <b>27</b> | Pont ile d'oléron / Bouée de Boyard, France                                    | 45.847389 | -1.17067  | 14-Dec-2016 |

|              |    |                                                       |           |           |             |   |
|--------------|----|-------------------------------------------------------|-----------|-----------|-------------|---|
| ORT          | 15 | Ortigueira, Galicia, Spain                            | 43.72246  | -7.80508  | 2016        |   |
| Ostende      | 29 | Ostende, Belgium                                      | 51.23815  | 2.91815   |             |   |
| OT           | 21 | Espasante-Ortigueira, Galicia, Spain                  | 43.715354 | -7.812319 |             |   |
| Pal          | 29 | Port de la Pallice                                    | 46.160381 | -1.22275  | 07-Nov-2016 | 1 |
| Palice-A     | 18 | La Palice, Bassin à flot, France                      | 46.159087 | -1.215764 | 23-Fev-2018 |   |
| Palice-B     | 76 | La Palice, lock, France                               | 46.15854  | -1.218429 | 23-Fev-2018 |   |
| PC           | 93 | Porthcurno, SW England, UK                            | 50.040025 | -5.650185 |             |   |
| PD           | 64 | Padstow, SW England, UK                               | 50.548028 | -4.982802 |             |   |
| PEN          | 45 | Barres de Pen Bron, France                            | 47.306317 | -2.513833 | 2016        |   |
| PEN_001      | 22 | Camaret plage-Penestin, France                        | 47.497118 | -2.493634 | 11-Jan-2017 |   |
| Peniche      | 12 | Peniche, Portugal                                     | 39.36844  | -9.37944  | 2016        |   |
| PET_001      | 24 | Brest port, France                                    | 48.381188 | -4.471461 | 14-Dec-2016 |   |
| Pir          | 30 | Pirou, France                                         | 49.165883 | -1.600833 | 2016        |   |
| PIR          | 29 | Pirou Nord, France                                    | 49.182383 | -1.616367 | 2016        |   |
| Plg          | 51 | Le Pouliguen - La Baule, France                       | 47.260288 | -2.415963 | 12-Jan-2017 |   |
| PtArm97      | 18 | Pointe de l'Armorique, plage des ducs d'albes, France | 48.325627 | -4.453547 |             |   |
| Q13A         | 12 | Q13-A, North Sea                                      | 52.1911   | 4.1361    | 28-May-2014 |   |
| QUI_001      | 23 | Pont d'Iroise, France                                 | 47.54575  | -3.067167 | 08-Jan-2017 |   |
| RadeBrest_R1 | 10 | Port du Tinduff, France                               | 48.390145 | -4.399726 | 20-Jul-2016 |   |
| RadeBrest_R2 | 10 | Le Fret, France                                       | 48.338097 | -4.36882  | 20-Jul-2016 |   |
| RadeBrest_R3 | 10 | Quélern, Roscanvel, France                            | 48.286791 | -4.506798 | 20-Jul-2016 |   |
| RadeBrest_R4 | 10 | Pte Ste Barbe, Camaret, France                        | 48.306091 | -4.550829 | 20-Jul-2016 |   |
| RadeBrest_R5 | 10 | Ravenoville, France                                   | 48.281993 | -4.571943 | 20-Jul-2016 |   |
| RB           | 21 | Réville, France                                       | 43.554739 | -7.157555 |             |   |
| ROC_VER      | 18 | Roc-Rouge, France                                     | 45.983578 | -1.405557 | 05-Oct-2016 |   |
| ROS          | 30 | Roscanvel, France                                     | 48.554028 | -2.714689 | 2016        |   |
| Roscanv      | 12 | Rothéneuf, France                                     | 48.3146   | -4.545065 | 2018        |   |
| RS           | 21 | Kildin Island, Barents Sea, Russia                    | 42.548425 | -8.878226 |             |   |
| SB1          | 10 | Pordic, plage du petit havre, France                  | 48.555676 | -2.716138 |             |   |

|           |           |                                      |           |           |             |
|-----------|-----------|--------------------------------------|-----------|-----------|-------------|
| SB2       | <b>10</b> | Scheveningen, North Sea              | 48.584578 | -2.78885  |             |
| SCHV      | <b>1</b>  | Seattle, USA                         | 52.0987   | 4.2582    | 08-Jul-2014 |
| She       | <b>19</b> | Cromarty Firth, North Scotland, UK   | 57.678405 | -4.251833 | 2013        |
| ST        | <b>21</b> | Esteiro-Muros, Galicia, Spain        | 42.793213 | -9.022066 |             |
| St-MIC    | <b>29</b> | Saint-Michel en grève, France        | 48.689017 | -3.58305  | 2016        |
| StAnd     | <b>15</b> | Saint-Andrieux, France               | 49.54744  | 0.0798    |             |
| STBRI     | <b>6</b>  | Saint-Brieuc, France                 | 48.543    | -2.7122   | 10-Jul-2017 |
| StMalo    | <b>30</b> | Saint-Malo port, France              | 48.648546 | -2.021647 | 16-Jul-2017 |
| StNaz-I   | <b>26</b> | Saint-Nazaire, France                | 47.27074  | -2.19894  | 30-Jan-2018 |
| StNaz-II  | <b>25</b> | Saint-Nazaire, France                | 47.27391  | -2.20027  | 30-Jan-2018 |
| StNaz-III | <b>24</b> | Saint-Nazaire, France                | 47.27312  | -2.20259  | 30-Jan-2018 |
| StNaz-IV  | <b>25</b> | Saint-Nazaire, France                | 47.28964  | -2.19813  | 30-Jan-2018 |
| StNaz-V   | <b>25</b> | Saint-Nazaire, France                | 47.27941  | -2.1988   | 30-Jan-2018 |
| SW        | <b>78</b> | Swansea, UK                          | 51.606754 | -3.922934 |             |
| Tatihou   | <b>24</b> | Tatihou, France                      | 49.586734 | -1.236274 | 09-Jul-2005 |
| TH        | <b>30</b> | Thorsminde, Denmark                  | 56.372631 | 8.119411  | 11-Sep-2016 |
| Thau18-P  | <b>93</b> | Thau, Sète port, France              | 43.41052  | 3.701841  | 26-Fev-2018 |
| TRI_001   | <b>23</b> | La Trinité sur mer - Port, France    | 47.584917 | -3.0248   | 09-Jan-2017 |
| VAR       | <b>28</b> | Varengville, France                  | 49.919733 | 0.985161  | 2016        |
| VEY_001   | <b>19</b> | Port en Besin / Baie des Vey, France | 49.383208 | -1.094829 | 02-Dec-2016 |
| VG        | <b>78</b> | Vigo, Spain                          | 42.225194 | -8.773663 |             |
| VHO       | <b>15</b> | Vale dos Homens, Aljezur, Spain      | 37.38853  | -8.82312  | 2016        |
| VIG       | <b>15</b> | Vigo, Spain                          | 42.26008  | -8.70214  | 2016        |
| VILL      | <b>30</b> | Villerville, France                  | 49.403744 | 0.123833  | 2016        |
| Vill16    | <b>15</b> | Villerville, France                  | 49.40369  | 0.12351   | 2016        |
| VLR       | <b>30</b> | Veules-les-Roses, France             | 49.878117 | 0.79465   | 2016        |
| VV        | <b>21</b> | Viveiro, Galicia, Spain              | 43.689692 | -7.598444 |             |
| WB        | <b>67</b> | Wihitsand Bay, SW England, UK        | 50.359067 | -4.311526 |             |
| Wim       | <b>59</b> | Wimereux, France                     | 50.772633 | 1.603067  | 2016        |
| WIM_001   | <b>39</b> | Wimereux Boulogne sur mer, France    | 50.786667 | 1.601944  | 01-Dec-2016 |

2



|         |                                                  |   |       |       |       |  |     |                                                                                                                                                                                                                                                                                                                                    |
|---------|--------------------------------------------------|---|-------|-------|-------|--|-----|------------------------------------------------------------------------------------------------------------------------------------------------------------------------------------------------------------------------------------------------------------------------------------------------------------------------------------|
| nuclear | 009-<br>C14115_p<br>131                          | T | 0,970 | 1,000 | 0,710 |  |     | GACAACAACCCATGTATCAGGGTAAAAAATTCGTCMCCCAACAARTCAGATGAAGACAG<br>TTATGACAGTGCCCAACAYGGACCWGTAGATGCTGCAACAGCTCAACAGCAACAACACCAA<br>CAGTTTCT[A/T]GGAGATGCTTCTGGAGCCTTACCTAAGTTTGAACAATAGACACAACAAA<br>AATACCCTTACCAGATGGYGTACCCTKGACCATATYAAAGCCTTTGAAAAAATGCATAAAG<br>AACATGCTGAGGCAATAGTGGATGTAGTGGTCAATT                            |
| nuclear | 014-<br>Contig165<br>04_pos702<br>_Edu_EU_<br>US | G | 1,000 | 0,565 | 0,389 |  |     | CTAAATCWGAATTAGAGAAWGTMAGRCAGAAAACAAAAGGATAATAAAGCTCACATTGAG<br>TCAGTTAGAGAGAAGTATGGYRGCAGTAGRGGWAGCAGAAAACAGACAAAAGTGTATCCAAG<br>CTGGAGAGGATGAACGATTACTGGAGAGACA[A/G]GAAGCTCATCTGGAAGAGAAAAACM<br>AACTGTTTCCACAGATGTTTGGTTATATTGAGACCTTTGAAGTRGTTATAGGAGTAGCTTTC<br>CAACTTCTGACATTACTYATATTTCTGTCTTTACTACTTACAAACATTGATAAGGCTCTAC |
| nuclear | 015-<br>C17324_p<br>1089                         | A | 1,000 | 0,000 | 0,861 |  | X   | TGGTCTCAAGAAAGATGTTATTTTTGAGGGAGATMGRTYAAGTCCTGTAATATCAGATATYA<br>AACTTGAAACKGACAGTGATTTTGGTTGAGTTGAGGACATTCCATCATTGTTAGATACAMGF<br>TACCAACCAAGAGTTGCATTGAGGTT[A/G]GCWTRTCAGATTGGATGATAGAATTAAGA<br>CTCCTCGTACWCAACAGCCTATGCCAGCTCCTTAACRACAGTRTTACCAACAAATGTTGCA<br>GYTATCTCTGAATTRCAGAATGGARGTATGGTGAATGTAGGTGGTGGAGAYTCTT       |
| nuclear | 017-<br>C17424_p<br>75                           | T | 0,990 | 0,266 | 0,471 |  |     | ACTGATGGAGCTMTTGTTGTTGTAGATTGTGTGTCTGGTGTATGTGTACAGACTGAAACCG<br>TACTTAGACAAGC[A/T]ATTGGAGAAAGAATTAACACAGTCTGTTTCATGAACAAGATGGAG<br>TTGGCCTTGTTGACACTTCAAGCTGAACCTCTGTACCAAACTTTCCAGAGAATTATT<br>GAGAACATTAATGTCATCATTGCAACATATGACATTGAAG                                                                                          |
| nuclear | 022-<br>C20739_p<br>355                          | T | 0,911 | 0,000 | 0,833 |  |     | TGATGGAGATATAGAAAATAATCAGGATGATCTCAGTTCTTCTGCTCCTCCCAGCACTCCTC<br>AWTCTGTAGACACTGACGTCASKAAACYGTTACCACCTGTTTCTGATGTAGATGTGAAGCCG<br>GAAAYCCCAGCTAAATCACCTACACC[A/T]CCTAARTCTCATTCTTATCACACCTTTGAGAR<br>TTWCTTCCCCTCTTGAACCTCTTATTCCAGCACACCTCCTGTAATCCAGCACCTTCTCCTCA<br>YGTCCYCCACCATCYTTAATTCATCCTCAACATCACAGACTATCAAAA          |
| nuclear | 026-<br>C23582_p<br>410                          | G | 1,000 | 0,000 | 0,863 |  |     | AGATATGAATTTCCCATTTGATGCAAATTTTYTTTGAAGTGAGGATTTYAATCCGAAAGAAA<br>CTTTTGCYAGTYGCCTCYGTCACAATTGTGCTCTAAATTAATTCAGGATTGTATGTGGTCTG<br>GAGATRCATTTTCTSCAGYGAGCA[A/G]AAGGATAAAACATCTTCATCTTTTGACATGAAAA<br>CTGTTGATCCAATGGCAGTTTTYCCATGTTGAGTAACCAAYAATACAAACAATTCWCACAGC<br>ATTATGGGCTACTTGAGTGAAACAAAGCTTACAGTCTTGGCACAGAAACAC       |
| nuclear | 035-<br>C27467_p<br>175                          | C | 0,968 | 0,000 | 0,000 |  | X X | ATGAGGAGTCGTATGATTCAGCAGCTAATGGAGCTTGGTTTTGAGAAAGATGAGGCCGGG<br>AAGCATTAAATAAGCAACAATATGAATTATCAAAGTGCTCTAGCTGAACTWTACAAGCAAAA<br>AGGTGCTACTTATAGAGATGATGTATTA[C/T]TGGAAGTGCCAAGTCCAAAGTGATAAGT<br>GATAATGACATATCAGATACTCAGCAGGAAAACAATCCATTTGTGCCTAATCCAAATACTCC<br>TTTTCTCCACCAATGCTCAAGCGTTCAAGGGACCTAGTCAGCCAGTCTCTAGTCA       |

|         |                                                   |   |       |       |       |   |                                                                                                                                                                                                                                                                                                                                        |
|---------|---------------------------------------------------|---|-------|-------|-------|---|----------------------------------------------------------------------------------------------------------------------------------------------------------------------------------------------------------------------------------------------------------------------------------------------------------------------------------------|
| nuclear | 036-<br>C2959_p2<br>51                            | A | 0,990 | 1,000 | 0,864 |   | CATGTTATGGACAACATTGGTCAATGGAAGCCACTGTATGATTCCTCCACMCCTCAGGAMK<br>TTAAGTTACCGAGTCCATTCAAYGTTMTGACAGGACTGGATAAGATG[A/G]TAGTGTTACG<br>TTGTTTCAGACCAGATAAAATAGTCCWGCTGTACAGGATTTTATCACAGATAACTTAGGAC<br>AATCATATATTGAACCACCAACCTTTGACCTRGGTGGATCATTTGTTGATTCTWATARTGTT<br>CTCCATTAATTTT                                                    |
| nuclear | 038-<br>Contig313<br>15_pos127<br>4_Edu_EU<br>_US | T | 0,760 | 0,527 | 0,624 |   | GGCTTGGGTGTGCAACCATTTYACATGGGAAGCAAAAACAGGATGGAGAGATATGAARAA<br>CTTTGTYCGAACTGGGTTYGAAAATCATCTRATTTCTCTAGTTTACATTATGTTTTYAATATTG<br>ATGAAYACTGTCGTGGCCATGAGAGC[C/T]CAYGGAATYATWACYAATCATAGAGAAAGCA<br>TTTTATTGGAATTGCKTCTGTTTCTGTATTCCAATYTGATTGCATGGGGTYTKTWGCRG<br>GACTYAACCGGGAWCACGACGTRTCACACGAGTTTACGGACGCMGTATGGCAT             |
| nuclear | 040-<br>C33286_p<br>476                           | A | 0,571 | 0,995 | 0,642 |   | AGAATCAGAAGACGARGGRTCWGCTYACYGAAAAAGCCYGGTTCTACATTAGGAAAAAT<br>WMTTGGTGCAAAACARARRACAMTAGAGTCAATAAGTTCWATCAATGAACCTACTGSYCY<br>CCCTGGYTCTGTTATAAGTCGTGCAAGACG[A/G]GGYACAGTTACMAGCATTTCCGAAGAC<br>GATTCAGAACCCACAAAACCGTTGAAAMCWGGRATATTAGGCAAACYAAGGGYGTCTY<br>GARGCTMAATYATMGAYGAATCAAACGAAAGATCCATTAGAACTCCAGCYAARCCAGCW<br>T        |
| nuclear | 043-<br>C3749_p8<br>49                            | A | 0,640 | 0,010 | 0,000 | X | AGAAAAAGAGGAAGAGAAAAAGAAAAAGAAAGTTAGAACAACACTGAGGAAGAAAAAGAAAG<br>AACAAAAGAAAGAGAGAAAGAAAGAAAGACAGCGGGTAATMGAYGCAATGCAAGTTGGA<br>TCTGTACTTTGTGTRGAGAAAYATTACAGCAAT[A/T]GACACAGAAAGGGAGGCAATCAAAA<br>ATTATTTWCAGACTTTGCCCCWGTGGCGTGGGTRGACTTTGAYACAGGTGAYACAAAGG<br>TTGTGTCAGGTTTGAAGAGGCAGGAAAAAGCGGAGGATGTTTTAGAAAAAGCAAAGGCAGC<br>TA |
| nuclear | 045-<br>C39969_p<br>416                           | A | 0,959 | 0,809 | 0,997 |   | ATATGTAGCTGCAGTATTTACAAACCAATCTCCWGCCATWATACATTACATCAGCTGTGTTT<br>TATATGCAACTTATTTATGGTTTGCAAAGATAATTATCATCAAATGGTCATTACGGGTATTGC<br>TTAGATATCAAAATGGATGTATGA[A/G]GCAAGAGGACCAATGTCATTAACCAACCAAAAT<br>TTGGATTATGACTGTTAAGATATTAGGAGGAAGAAAACCTTTATTGATGAGCTATCAGTTTT<br>CATTACCAAAGTTATTTGTGCCTTCAGTGAAAGAGACAGTCAATAAGTATTTAA        |
| nuclear | 047-<br>C40145_p<br>294                           | C | 1,000 | 0,000 | 0,909 |   | TTTATTTGCAGTTTATGATGGTCATGGAGGTGCAGAAGTAGCACAGTACTGTGCAGCTAATT<br>TACCCARTATATTAAGAMACRAAGAGTTAYAARGAAGGMAGATTTAATGAAGCATTAG<br>AAGAAGCATTCTAGGTTTTGATGCCAT[A/C]TTAACCCCTAAAATTGTTCCAGGAACTGA<br>AAGTATTAGCTGGAGTGGARTCTGATGATGAAGGAGATCCTRMAAAKAKTMTCAMAMRR<br>CAAAGAACWGAGGCAGAACTWCTYCGACAGGAAGCAGATATGCCTATTGAGGAGTTAA             |
| nuclear | 049-<br>C42467_p<br>335                           | T | 0,990 | 1,000 | 0,092 |   | TTGTTGTAAGTGGCTGGAKCTTTRTTAGAACATGCAGAAAAGTTAYTAGACCGTGGAAATCAT<br>CCAATCAGAATTTWCAGCGGATATGARATGGCAGCAAAAAGTAGCTTGKCTCATCTTGACA<br>CCATTGGTGAAACATTTAGATTAGACC[C/T]RAAGAACAAAGAACCATTAATCAAYTGGCM<br>ATGACAACACTKGGCTCAAAAATAGTRAACAGATGCCATAGACAGATGGCAGAGATTGCGY                                                                    |

|         |                          |   |       |       |       |   | TRGATGCTATTTTATCAGTGGCTGATCTGMAAAGGAAAAGATGTTGATTTYGAGTTR |                                                                                                                                                                                                                                                                                                                                        |
|---------|--------------------------|---|-------|-------|-------|---|-----------------------------------------------------------|----------------------------------------------------------------------------------------------------------------------------------------------------------------------------------------------------------------------------------------------------------------------------------------------------------------------------------------|
| nuclear | 050-<br>C42717_p<br>722  | C | 0,978 | 0,705 | 0,976 |   |                                                           | AGACATACAAAGGTRTTCATTTGGTAATTTGGCATCAAACGYCTTGATTTAAGTAAAGGT<br>AAAATGGGYCCTGGACCTGGRGAATATGAGCCTTACAGAGAKGCCAGYATGAAAGCAGAR<br>AACTTAAATTCTATAGCAGAAGAACAAS[C/T]TAGATTTGAAGCCAGAATCCCAAGATATCA<br>TGARGCTATTCAGAAAGAWGTGGAAAAGAAGGGAGTTCCAGGACCAGGRAAGTATGATG<br>TGAARGGTGTTTTGAYCCAGAACCTCCYAAGGTTAAYACAGAGGGAATAGARGTAGAR           |
| nuclear | 052-<br>C44265_p<br>303  | C | 0,980 | 0,005 | 0,785 |   |                                                           | AGTWAATCAGTTAGGTGGTGTATTTGTGAACGGGAGACCCTCCRGATTCAACAAGGCAA<br>CGAATTGTTGAACCTGCCACAGTGGCGCTAGACCATGTGACATWTCTAGAATTCCTCAAGT<br>ATCGAATGGTTGCGTAAGCAAATTCT[C/T]GGACGTTAYATGAAACTGGGTCAATACGAC<br>CWCGAGCYATTGGTGGCAGTAAACCAAGRGTTCYACTAATGACGTAGTTACAAAAATTGC<br>TCAATATAAACCGCGAGTGTCCATCAATATTYGCCTGGGAAATAAGAGAYCGYCTAT             |
| nuclear | 055-<br>C4715_p1<br>037  | C | 0,957 | 0,989 | 0,102 |   |                                                           | CCTTCCATTAAGACAGTAGTTAATTATGACGTAGCCAGAGATATAGACACTCATACTCATCG<br>TATTGGTAGAACTGGCAGAGCAGGAGAAAAAGGTTTTGCTTACACYTTRGTWACAGAGAA<br>AGATAAAGACTTTGCTGGTAGTTTAGTA[A/C]GKCATTTAGAAGTTGCCAGCCAATYTGW<br>CTAAACCCCTTATTGACATTGCAAATAAAGTACCTGGTTAARAARAGTAGAWTCAAACATG<br>AGAAAGGRAAAAARTTYAAACTTCAAACAGGAAAAGGACTTGGTATGAAAGARAGG           |
| nuclear | 059-<br>C54420_p<br>784  | A | 0,989 | 0,000 | 0,000 | X | X                                                         | GTATCAGTGGGTAAATGGATCAGGAAATATTTAGATGGAGGAATGCTACAAAAATGAACA<br>GAGGAGAGTYCCAGGAGGAGGTGGAATGCTTGGAGGARGAGGYATGTCATCTAATCAACA<br>AARCAGAAGAAGACAAGGGCATGGAAATG[A/G]TACTCCTCATGGTAGAATGGGTGGTGA<br>GGGATACCAGGAATGAATGGTGGAGGATAACCAGGAATGAATGGTGGAGGATAACCAGGAA<br>TGAATGGTGGAGGAATAACCAGGAATAATGGTGGAGGGATAACCGGAATGGGACTTGGAGG<br>WAT |
| nuclear | 061-<br>C6231_p1<br>094  | C | 1,000 | 0,000 | 0,908 |   | X                                                         | ATTTGACAAGTTTGAGTGTTCATGGAGTGGTGAYGATAGGAACATTATGACTGGGTCATAC<br>AACAAATTTCTCAGAATGTTTGACAGGGAGAGTAAGCGTGATAATACTTTAGAGGCCAGTA<br>GAGAAAATATGAAACCTAGGACAATTCT[A/C]AAACCAAGAAAAGTTTGTACGGGTGGAAA<br>ACGGAAAAAAGAAGAAATWAGTGTYGATTGTTTAGACTTCAATAAGAAAATTCTCACACA<br>GCTTGGCATCCWAATGAGAATATCTTAGCWGTAGCAGCCACAAATAATTTGTACATTT         |
| nuclear | 062-<br>C63342_p<br>1271 | A | 0,990 | 1,000 | 0,083 |   |                                                           | GGAAACATRTWMARTGGTATGCCTCAAAGTATGYATGCTWTGATGGGTCATAATGCTAGY<br>ATGTACAAYCAATCAGATATKTCATCACCTCTTATGCAGTTAATCCAGTCAGTACCAGCAGCA<br>GGTAGAGACARCCAATCATCTGCCATG[A/T]TACAAAATATTACCATGCCAACARCTGGAGA<br>CAACCAGTCATCARTGTTATTGCAGAATGCTTCAATGCCYRRTCCACCTATGAATAATTCCAT<br>GAATCCATCTTACAATKCATTYGACAACTYAGGTACTTGCCAGCAAAAATGGTAA       |

|         |                                                  |   |       |       |       |   |                                                                                                                                                                                                                                                                                                                                   |
|---------|--------------------------------------------------|---|-------|-------|-------|---|-----------------------------------------------------------------------------------------------------------------------------------------------------------------------------------------------------------------------------------------------------------------------------------------------------------------------------------|
| nuclear | 063-<br>C73535_p<br>928                          | A | 0,979 | 0,000 | 0,829 | X | ACAGGGACTTACACTAATCATAGTATATCAGAGTCKGCTGTCATTCTCTCAAGCACCAACT<br>AAGACAAAAAGAGGTGTA AAAAGAAAAGCTGATACMACCCACCCCATTGTTGCAACCATG<br>CCTAAGGATCCATCAATTGAACCAACT[A/C]CTGTAAAAAGTAGAAAAGRCTCCAGCTAAAAAT<br>TCCTCCCCTCGAAGAGAAAAGCAATCGTCCGATYAAAAAGCCAAAGAGAGATTTACTAGAA<br>GAAGATTCTCCYGATCCAGAAAAACAGTATCTAAAGCAAAGAAAAGGAAAACTGTG  |
| nuclear | 064-<br>C73872_p<br>884                          | T | 0,989 | 1,000 | 0,112 |   | CCCCMAATCAAGATTCAAATATKTATCGCGCMAAATCTTTGCCTGCTTATTTCKGTA AAA<br>CGYAGAAAATCATCTGAYGCWCAGATTYCWTTGACRTTTGAAAAGAAAACAAAACRTTMTG<br>CATTAAAAAGACATCCGAAAAGGCATA[C/T]GGYGRATGCCAAATTTACTAGTTGGTAAAA<br>ATATTCAGGGGAAAATCGAATGAATTTGAWGAAAARTGGAAGAAAACCAAGGYCWGCKY<br>CRAAACCAAGTTCAAATACAACRATACCACACGATCATTAAAAAACTYATCAYAAGG      |
| nuclear | 067-<br>C77511_p<br>1253                         | C | 0,990 | 1,000 | 0,091 |   | CAATGCAGCAACGAGCGCAACAACAACGTGCAAATGGAAGTCCACCTAAYAAACAGACTGA<br>TYTAACRTGTTTTGAGAATAAAAAATAGTGAACCYATGCCATTYACAACATTTGGCMGAGGGA<br>TGCAAAAACATTCAACMCCTCAACARC[A/C]AATGTACTTAGAACAAATCCCTACTCCTCCAT<br>CAACACACAGTATGGGMTACCCGCCACAGATGATTCATCAACCAGTGCTACCAGATCATT<br>TCTCACACCWTCACCAGATTCACCTGGACARTGGTCAAGTTCATCRCTCATTCA    |
| nuclear | 068-<br>Contig775<br>41_pos349<br>_Edu_EU_<br>US | T | 1,000 | 0,630 | 0,908 |   | GGAGCAGCACAAAGCACTTACTGAATATCATGATTTAACAAGTGTTTTGGTGGATGGAGGGG<br>ACAGGTTCAAGTGTCTGCCTTGACATTTGATAACAAGATCTATTATGGATGGGCAATTCA<br>GGGGGTATGTGACAGGTTATTATGGG[C/T]TAGAAATGCAGAAGTATACATCATTAAAG<br>TACACATGACAGAAGACATTCGACAGATGATACCAATACAGCGTGGAATATTGTCTCTGAC<br>GAGAAGTACACTGAATTGTTCACTTCGAAGAGGACTAAGTGTGTTCAAYTMCAAGTC      |
| nuclear | 070-<br>C7841_p7<br>13                           | G | 1,000 | 0,304 | 0,320 |   | TARATCAAGACTRAAGGGTGATTCGTCTGATGTYGCTTTATYCAGGAAGAAATGAAGGATC<br>ATTTACTAGCATAYCTACAGTGGCAGAGYAAAGTTGATAGACTTTTCGATCGTGCAAARGAC<br>ATRTTCCAGTACAAGACAGAGTAGA[A/G]AAATTACAACATTCTAAACCAGTGATTGCYTT<br>AACWGAYTACAAGACATCTGAGATTGAATTCATCGAAGGGGAGACGCTTACCTTAGTAGAC<br>AATAGCAAGCGAGATAAATGGAAGGTACAAAACGAAAAGGGAACAGACTGCCATGG    |
| nuclear | 071-<br>C81364_p<br>839                          | G | 0,970 | 0,711 | 0,986 |   | TGATGAACAATTYACAAAGCTTAGCCTTTCTGGTGGCAAACCAAAGAAAAACAATGTYATTA<br>ARTCACTATGTCTGTTTCTGGGACCRGACTTCAGTACTGAYATCATTACWGTAGAAACATCT<br>GACCATGCAAGACTRWCWTTACAGCT[A/G]TCGTACAACCTGGCACTTTGAAATTGAAAGYA<br>AAGAGGATAAAGTAGAGGCTGCWAARATTTTTCAGTGTACCAGATTTTCATTGGAGATGCCTG<br>CAAGGCTATAGCTTCCMGRGTCAGAGGKCCGTRGCACAAGTACAGTTTGAYGACT |
| nuclear | 073-<br>C8592_p1<br>593                          | A | 0,910 | 0,005 | 0,860 |   | TCATCCRAAGATGACGAYAAGTCTATTTTTAGCCAATTTGCTGAGAAAGACCATGCCCGTC<br>TSATCACAGTTCTTGATGCTCAAATACAAAACCTCCTGAAATATGGGATTCCATTTGCAAAC<br>TTCGTGTTYTGACYGTCGTGAAACT[A/T]ACACAAAACGCCATCAGTGTAAATACCWGAAGAT<br>TTYTGAAAACYAGAGCGCTTCARGAAGTAGATCTGAGYAAAAATGGAATAAATGAAATACC<br>AGACAAATTCATCAGCTACAAAATCTCCGAAAACCTGAATTTAGCCACAATA      |



|         |                          |   |       |       |       |   |   |                                                                                                                                                                                                                                                                                                                               |
|---------|--------------------------|---|-------|-------|-------|---|---|-------------------------------------------------------------------------------------------------------------------------------------------------------------------------------------------------------------------------------------------------------------------------------------------------------------------------------|
| nuclear | 076-<br>C9105_p9<br>49   | G | 1,000 | 0,964 | 0,111 |   |   | TTCKTTAACAGATGTTCTTGAMAAGCTCAATGGTAAAGATGATGGCTATGGAACAATGTCTC<br>CCTCTATGTCGCCATGTTTAGGAAATTTAATCCMCAYKTRTATGTACCMCTGAAAAACCR<br>GTAGTAATGCATAAACCGACAAAAAGC[A/G]TCRATGGCGTTGCAAACACAYAACAGTCAAW<br>TTTAYCAAAGACGACTCGTCAGCAARAGYGCTCCYTCRATGCRCAATGTWCWAGTTGTTGG<br>AAGTTACGCACACGAGAAAAACAATGGGAACTACGTCGYGAAAAAACAGAAATRG |
| nuclear | 080-<br>C96364_p<br>474  | G | 0,990 | 1,000 | 0,082 |   |   | CGAACAAKCAACAATACAATTTACTCATAGAATMCAATACAAAGGAACTCTTGTTGCAT<br>CATCGGTAGRCRCYGTATCTACAAGCTCAGATCATCTTCTTCCACCATCAAGYTCACAGCARG<br>TCTTTGCTCCACTGTCACCTCTTTT[A/G]AGCATTTTGACACAAGCTGCCAGCAAGCACAAAC<br>TTTCATCACWTGTGCCWCAAATTCAWCAACAACAGGAGTATCCCGATATTGCGYARTTGT<br>KCAATATCTTCARCAACAACARCAACARCARCAGCARGCCTCGCTTTAGTC     |
| nuclear | 082-<br>C9777_p6<br>12   | C | 0,980 | 1,000 | 0,874 |   |   | CATCTCGAACTCCAGATTTCTYTTYGGATCAACWTTTTGTGCTCCKATCCCWACAAATWCY<br>GAAGGAARTCCTATGCTACCARTGCTGGTAAACATGTTCCCATCGCCATTTTTCTCCGACAA<br>CAAATTYTCGATCAGCCTTTTGCAA[C/G]TGACCACAACCTGTTACGGTCAAATACCTCMA<br>ACGCATAAATCTTTCTGYGTCAAAAACCTGTTCTCAAATATKGCAGACCGCAAGGTCGTAA<br>TGACACACTACGTGCACTGAAAMGGAAAATTCAGAAAATTCACAACATGC      |
| nuclear | 085-<br>gi_212815<br>835 | C | 0,644 | 0,788 | 1,000 |   |   | AGGTACATGTAAAGATAGAGAAATTATGCGACATGACCCACATAAATTGGTTGAAGGGTGT<br>CTTGTAGCAGGAMGRTCTATGGGTGCWGTGGCAGCCTACATTTACATTAGAGGAGAGTTY<br>TATAATGAAGCTTCTAATCTCCAAGTTGC[A/C]ATTAAGAGGCYATGCTAAYGGACTTATT<br>GGTAAAAATGCGTGTGGGTCTGGYTATGATTTTGATGTGTTTGTTCATCGTGGAGCTGGAG<br>CATATATATGTGGAGAAGA                                       |
| nuclear | 088-<br>gi_223020<br>458 | C | 0,948 | 0,000 | 0,000 | X | X | ACGAAGACATGGTTTGAGCATTTAGAAAAACCTTCATGGAAACCACCTARCTGGGTWTTTG<br>GTCCAGTCTGGACAACCTTATACACAAGTATGGGATATGCYTCRTACATGGTGTGGAGAGAT<br>GGTGGTGGTTTTAATGGTGAAGCAACA[A/C]TACCATTGCCTTATATGGTTACARCTTGC<br>ACTTAACTGGGSTTGGTCAACMCTCTTTTTTGGTGCTCATAAAATAGG                                                                          |
| nuclear | 094-<br>gi_223025<br>780 | C | 0,978 | 0,005 | 0,839 |   |   | GTTGGCCAGCTTRAARAACTGGAAAATGARAATCAAGAATCTGCAAAGCATTGGAAGAC<br>ATTGT[C/T]AGTAAAGGAGAKACATTAAGTACGATGAGTACAGGAAGTTTTGCATGATATYGC<br>TGAATGTCARCTTCGATGTCAAGCTTTAGAATCMAATWCTTGATGATAGTATGAAAAGTAT<br>TTTGACAGTGTGTAATAAACCCARATAAACT                                                                                           |
| nuclear | 098-<br>gi_238643<br>554 | G | 1,000 | 0,766 | 0,986 |   |   | AAAACATGGACAGAATGTYAKTTAAACAACCATTCAWAGTTCKTTCTTAATAATCRKTTCTAC<br>CGTARCKGTCTTTTTTCGACAGAGATCGTCTTYATATYCAAWAWAAGTCACTCCAATAAAA<br>TAAACRAAAATAAACACTGGCGCTT[G/T]AAATTCMACTGAATGCTTACGACAATATTGTT<br>CTAGAGAAAAGAACTCTTCTTCTCCATTAATAACTAYGCTYGGAACAGTTTGRRCRCWATK<br>TTTTRTGATCCAAGATTGTCATAAAACCMGGTGACTGTTTCCYATTGATCCAC  |
| nuclear | 099-<br>gi_238644<br>156 | C | 0,990 | 0,984 | 0,136 |   |   | CGANCAACATCTGGATGCTATGTAACRATGATGGTCCAGTTCCACKGATGAATTTACYAATTC<br>AATATATCACACRAATTCATTKMTTAAAACTAAKSTCCACCTGGTTTATTTATTTGTG[A/C]<br>AATACGCCAWKTGATGTACAACCTTTGGAACCTGTCAAATCCAGCCAATACACCAGCRCCW                                                                                                                           |

|         |                                                                      |   |       |       |       |   |   |                                                                                                                                                                                                                                                                                                                                 |
|---------|----------------------------------------------------------------------|---|-------|-------|-------|---|---|---------------------------------------------------------------------------------------------------------------------------------------------------------------------------------------------------------------------------------------------------------------------------------------------------------------------------------|
|         |                                                                      |   |       |       |       |   |   | KCCATTCTCTGAGWACRTTGGCTCCTGCTCCCTTCATCAAGGACATGAACCCYTCRTTCTTG<br>ATAATGGTCATTGTGCAGTCAATT                                                                                                                                                                                                                                      |
| nuclear | 108-<br>gi_376503<br>08_gb_AJ5<br>16731_pos<br>350_stl_tv<br>a       | T | 0,989 | 0,000 | 0,000 | X |   | GAGAGCATGTAAAAAATGGGAGCAACTCTTGCTGAAATTAATTCACAGGCAGAGCTGCAA<br>TTTGTAAAGGAAATTAGCAATGTCTGGCCGAGAACTTCTTGGATTGGTGGTACAGAT[G/T]C<br>GGCTAATGAGGGAGAGTGGAATGGATATCTGGAGACCAATKACTGTCWCYGACTTCAA<br>ACCTCTTACAARCAAACAAATGATAAAATATGATCGTCCAGAGAGACAAGACTGTCTTGCTA<br>TTTCGTCACATGTTGATTTCCACTG                                    |
| nuclear | 109-<br>gi_380851<br>736_gb_Co<br>ntig10267<br>_pos417_E<br>du_EU_US | A | 0,947 | 0,144 | 0,032 | X | X | YCTGTCCAACATCAGTATCCATKGTAAACTTTCTGGCWGTRGC[A/G]CCATTGTTAGTAAAG<br>ATTGCTGTTCCRTTTCATAGGGATTRGCATTAATCATATTRATRGATCRTCCTAAWGTYTCW<br>ACCTCCATACTGACCAACACKGGRCCAAATATYTCYCYGTGTAACATTTCAATTCAGGCTTG<br>ACATAGT                                                                                                                  |
| nuclear | 111-<br>gi_384113<br>180_emb_<br>HE609053<br>_pos1114_<br>stl_tva    | G | 0,910 | 0,021 | 0,000 | X |   | AAAGCACCCATTAGTACAAGCTACACAGCGTCTACATTCGAAGGCACCATGAACTGGATCAA<br>ATTCAACTTTCCTATCCTTCAGTTGCTCTAAACCAACCTGGAGGACACCTGTCACATCTCT<br>GCAGAAGTCTCCTGGGGTAGATA[A/G]AAYTCRTGTTTGCTATAATCGCAGTATATGTCAG<br>TCTTCATTGTCAGACAATTTTCAGATTTACCARTAAGMCAGCTAAAACAAAGGACATGCTG<br>AACCTGTCGTAAGACTTTAGTTGAATC                               |
| nuclear | 115-<br>gi_384113<br>217                                             | T | 0,986 | 1,000 | 0,077 |   |   | TTCAATTGTTGACTGGGTATCTACCTATTTGTGTAATARTTTAGAGCAATGGATTACAGATAA<br>CGGTGGTTGGCWAGGATTTGTGGAATTCTAYAACCAAGGACARAATCATAATGACAGTCCR<br>TGGGATGTGAAAGGACTTGTTAAATA[C/T]GGAGCAATAGGWGTAATAGGCGCAATGGCG<br>TTAAGTGCTTTTCTACAAAGAACGTGAAAATGCCTTGATTGGCATATTGTTGTTGTTTTGTTA<br>TTGTTATCAGGTTAAATGRAYRAAAGTSGTGACTTCATTGGMTGTATAACTACAG |
| nuclear | 117-<br>gi_386354<br>27                                              | C | 1,000 | 0,188 | 0,658 |   | X | ACGACAGTCGACGTTTACCTWCTACAACATATACTTCAGTCTWAASTTGTGTCAGAATGGG<br>TCGTTACCAAATTTCTT[C/G]CTGGTGCTGTTTTGCGTTGTCAGTTTATTTGACCAGGGGYT<br>AACTAATCCWGTGATGACCACAAAAYGATGAMCACCACGATGCYCCGATAGTTGGYCAC<br>CAYGACGCTTTCCTYAAGGCCGAATTCGATTTAACATCACTCAATG                                                                               |
| nuclear | 124-<br>gi_387154<br>968                                             | C | 1,000 | 0,995 | 0,382 |   |   | GAACCTTTYWCTSGAAWTYRGAKRACRTAACATWRCAKAWTATTGATATAGCATMRATAT<br>GTGGCAYAMCATAGGAATGATGATCATAAAMWATTAATAGCACTTTGGTCAATAAATTA<br>ATTGCACAAT[A/C]ARKTATCACATTGATAAATGTCTTGTRTAGTCATATTCTATYGTGGRA<br>CACAGCTTGYACAACTTCAAAAATCATTAAATATACATGTACTCCTAACTCTCCTCCGCC<br>ATCAGTACCATCTGATTATCTTCTTCATAACAT                             |

|         |                       |   |       |       |       |   |   |                                                                                                                                                                                                                                                                                                                                                                                                                                                                                                                                                                                                                                                            |
|---------|-----------------------|---|-------|-------|-------|---|---|------------------------------------------------------------------------------------------------------------------------------------------------------------------------------------------------------------------------------------------------------------------------------------------------------------------------------------------------------------------------------------------------------------------------------------------------------------------------------------------------------------------------------------------------------------------------------------------------------------------------------------------------------------|
| nuclear | 126-gi_387154_971     | G | 0,949 | 0,551 | 0,084 |   |   | AGTTCTGAACACCCAGAATGCAAAAGCAACAAGTATACACACTATAATACCAAAGCTAAACC<br>TCTGAACACATTGATCAAGRGRATAACTGCTTCAGGAATTGTGACCTTGTGTGTACCATTR<br>TAYTTTATATTGGCAAACAGGACATC[A/G]TAATCCACACARTCAATCAGAAATATAGAAAA<br>TAAAAACAACAACAGGAAGTGGATTAGTTGTAGTATATCTTCTATGACCATAACAACAAAAAC<br>CTCCTCTTTGATGATAATTGTAAGTCTGGCAAAAAAATCATCCAAATTTTCTA                                                                                                                                                                                                                                                                                                                             |
| nuclear | 127-gi_387154_976     | C | 0,989 | 0,005 | 0,043 | X |   | GATCAGGAATWTAGGGACWGTTCGCCMAAAGTACGGCGAGTYCYCGTTAATTTACARGAC<br>AATCATGTCRACWAAAGGGATCTCRRTGATGGAYYCTTCWAAWAGTGGAGGRAATGGATC<br>TTTTAAAACAAGTTTCTTCGCGYATATTCA[C/T]AAACAAGTGGTTTTGTTGCCAGGATTTTCG<br>AGGATTGTCACARGAYRTGAATAAATTAGACCAGGAAACWCAAACACCGGGYAGTGGGTC<br>GCCWTTGGAAAATGTWAGAACAATGTCAGAAAACAATTKCAACAGAYGKATTATGAACT                                                                                                                                                                                                                                                                                                                           |
| nuclear | 138-abyss_C12_19_p217 | A | 1,000 | 0,228 | 0,000 | X | X | TATATGAATATTAAGCCGAATWTATTWAAGTTATAAMTTATATCTACGWTTACTTCTTTTTTC<br>AGGGTTTTCTTGAGAGTGGTCTCTTGGTGAAAGATGTTGGTCGCCTGACCAACGTATACTTGA<br>AGTCTTGGATGTTCAAGGTCGACATA[A/T]TAGCCATCTTACCAACCGATTTTTTYATTTTCT<br>RCAACGAAATACAGCCTTTTCGTTTAAACAGAATTATCAAAAATTTGGAGAATGAGGGAGTTTT<br>TTGGCTTGGCTCAGACTCATACAACTTTCCMAATCTTTTTGGTGTTGCTCA                                                                                                                                                                                                                                                                                                                          |
| nuclear | 145-abyss_C21_6_p5751 | T | 1,000 | 0,990 | 0,156 |   |   | YKTGTRAWTTGATAGAGTGAKCATGGACGWGGGTACATGCTTAACCTTRYAACCTWGGTA<br>ATTAGTAAATCTYRAGKTAAGTWTGATWYASATTTCCACGRTTTTAGTGACATGCGRY<br>TGKKGTTGAGTTATCTGACCGTGCACCTT[A/T]TAAATATAACMCAAKAACAGGACTTTCCAC<br>CTTTAAACCRKTGCCTRAGGSAATTGAATCACAAGTAATGAAMTAACATTTGAAGAAAAMA<br>GAATTATAAATYGMAGGTTGATGACCGTTTTGCCTATTTTATACCGACAAGCTTATT<br>GAAYTAAGYTTATMAACAAACKAGCGGRAARGCTAGYWAGAGWGWWAGYAAACACCT<br>TYTTKAACRWCACTGAYATWATTTTCATYCAATTCGTTGTRTCTTATTGAYATMTWACAGA<br>CAAATAATTTACGAGCGAAAGCAATTTCT[A/T]CTTYAACAGTCTCGGATGTAATCAKAAG<br>ATGTACGGTTTCTACWCATGATATCTAAAAARCACTAAATGTTATTTGTRTGAAWTTMTG<br>AAATGGAAAAWAYCCATTTTTTCTTYGAYCTTGRATRATACMTCAWGTGCTGAAGCAG |
| nuclear | 155-abyss_C47_7_p4647 | A | 0,990 | 1,000 | 0,088 |   |   | ATTGACTTTGGCCGYATWCCGTGAGAACGATGGTAYGCCATCTGCCGTCCATTGKCKTTTA<br>AAAGTACAMGRAAGAGGGCAAGGATTATGATCATTGTRATATGGTTGGTKTCMGGTTGTG<br>TGGCACTTCCAGACATTTTATTCATGCA[A/G]CTGGATAGTTTGGTACCTGATTTTGTGCTT<br>CATTGTTGATATCGTGTCTCCAGGATGGGACCAARACAARCAACATTTTATCAGTTGCC<br>TTAATTGTCYTATTGTATTTCTYACCAATGATTTTTATTGGATTYGCCTATATAC                                                                                                                                                                                                                                                                                                                                 |
| nuclear | 159-abyss_C78_3_p5373 | A | 1,000 | 0,980 | 0,230 |   |   | ACCRATGCCTAAATTTGAAAACCTTACMCCAATCAAATAGAATTTATCAGGGCAATGAGA<br>ATGAGGCCWCKTTTCTCAAATTCWGGTATGAGACCAGGYATGCCTATGCCACCAAGAA<br>ACATGCCACCTCCACCAAGATACCCTGG[G/T]CCTCCTATGACATCTCCAACAGAYGCAGGR<br>GCTCATCGGCTTCCWGAATGCCACATCCATCTMTCTGGTCAGACACCAATGCCACCTCA<br>GGCCTCGCAACGTCTCAATAAGGAGTATYCCAGAGTCACAAAGTCTCATCCTT                                                                                                                                                                                                                                                                                                                                      |

|         |                                                                |   |       |       |       |   |                                                                                                                                                                                                                                                                                                                               |
|---------|----------------------------------------------------------------|---|-------|-------|-------|---|-------------------------------------------------------------------------------------------------------------------------------------------------------------------------------------------------------------------------------------------------------------------------------------------------------------------------------|
| nuclear | 166-<br>soap_C107<br>2_p3271                                   | T | 1,000 | 0,984 | 0,151 |   | ATCATTCTCCACCTGATGGTCTCGAGCAGATCAACATTATACGAATGGAAGTCTTTGACG<br>CTTACCTGTTTTTCCACTTGTAATTTTTCTACTGCTCCAGTGTCTGGCTGACAGTTGGGGT<br>AACAAATTGACAGATTTTTATATGT[A/T]AAAGCGCCATTGTGGGCTCGAGCTCAATTTTCGTT<br>RARCAGAGCCAAAGTAAGAATAGCAATTATTTAGTTGCAACAATTTTTATCACAGTTCCAA<br>GATTCCTRTGTTTCAGTCTAGTAGGAGCTACTAACCAATACCATYTWTAYC    |
| nuclear | 174-<br>H_L1_soap<br>_Contig18<br>65_pos473<br>2_Edu_EU<br>_US | C | 0,980 | 0,898 | 1,000 |   | RTACGGAGCGACTATAAGTCGTATAATTATTTCAAAWGTAAACCATGCGTTACTTGCACATT<br>CTATATAAAAGAAAGCTTCATGAGGCTCTGTTTTMAGTTTCTCGATCCGCCATATTGTTGTAT<br>TGGAAATGTTCACTGTAGCATTTTT[C/T]AAAATAGTACTCGCATTTCCGGATGTGCTTTA<br>GACAAAACGATAATATAGATGTTACTATAAAGAAGACGGAACGACTGCTATCACCTGCAA<br>GATAAATTAACAATTATAAAATGAAAAATATCAAAAACATAAACTGCATTTA   |
| nuclear | 180-<br>soap_C254<br>_p1675                                    | G | 0,989 | 0,989 | 0,100 |   | ATCTGWTAAGTTAACTTACTTACTGTCTMAAAMTATTGCACTTGTAAATTTTGCTGTTGCAC<br>TTAATGCCATGGCACATTATTACARTATTTAGGATCGATTTTAAGGTACGGCAAATATAAAA<br>TATTATTAACGATTTGCGAGGATTT[G/T]AGTGCAGCTAAGACCGTTCAAAAACATTATTAT<br>TCAAATAWRITGATATTAAGATGACTAACTCTTGTTTMTGTGCGGATAAATTGTCACAA<br>ACATCGCATTAAACCAGACAGATGGYACGRTAACAATAGARAAGGAGTWMITTCC |
| nuclear | 184-<br>soap_C311<br>8_p4466                                   | A | 0,938 | 0,042 | 0,933 |   | AAACATTTTAAAATTATGAAGATTATCTGAAACTTAAATATGATCCGAATAAGCTCAGTGTT<br>AAACGTACCCTGTCACACAACCTCAACAACATCTGATTGGAACATGTTTTGACAACAATACT<br>GGTTCACACATATTTAGAGGAAGTG[A/G]GTTATTTGTGAATTTGAAGTCAATCCATCTTG<br>GGTAAATTGAAWTGAGGATTGASACATGATTTAATCACATCATATACAAAATGTCTGA<br>GTTTTACAATGTTGATGTAATGTAGCTTATAGTCTAAAGTATATGTAGGTTGTA    |
| nuclear | 187-<br>soap_C342<br>2_p3286                                   | T | 0,970 | 0,933 | 0,879 |   | AATAATYAAAGTTATCTTACTGTAACCTAAGGAGTCGTYTGTAACGTCTAGGTCGACCCA<br>GACATTCACACTGCTTTTCAAATTTGACCTGAAGTCTATGTAATGATCCKCTGTCTCTGATT<br>CCACCAAGATAAAATGTGTGTGATC[A/T]GGGTTTARTTCRTGAATATCCTTATTTGGTTTAC<br>AACCTTCATTGGTRAGTGTCAATCCCTCCTGAAAAATAAAAAATAATTTCTTTTTTAAAGG<br>GTTTTGTACATATGCATAGGGGTGACACAAGTATCTGACCATGATTTTAAT    |
| nuclear | 202-<br>L02_mira_<br>C1_p242                                   | C | 0,971 | 0,194 | 0,842 |   | GGTGATTTATATGATCATTGTAACRAGGGWATATACTYGA<br>GTACAAAACAAAGAARATTTGTGTATGACAATACTGCTAGTGTAAATGTCTTGWAATATTTT<br>TTAGATGGGAAAAGGCTCCTTCAAGTA[C/T]GCCTGGGTTTTGGACAAACTSAAGGCWGA<br>GCGTGAACGTGGTATTACCATYGACATTGCTTTGTGGAAGTTTGAGACCACCAATACTAYG<br>TTACCATTATTGATGCCCCAGGACATAGAGATTTTCATCAAGAACATGATCACTGGTG                    |
| nuclear | 206-<br>R_L04_ne<br>wbler_C0                                   | T | 1,000 | 0,011 | 0,922 | X | RATATCATACCTGGATGGWGGGCTCTGTCCCTSGAWGGAGGACCWCGATCATAGTCTCT<br>TGACCCATAGTCCCTAGAAGGAGGTGGAGGAGTATAGGCTCTAGACTGTGGGGGATAATC<br>ACGACTGGGGTAATCTCTYGTGARGCACT[C/T]CTACTAGGGGGCATGCGACTGCAAAACA<br>TRAAACAAAAGCAAACCATGCATTACACTGAAACAGACAMTATACATATATTCATGTATATA<br>CATATTAATAATCATCTTCTKATTTAATTATAAAYGGTTAAATCSTGCATYTTGT    |

|         |                                                       |   |       |       |       |   |   |                                                                                                                                                                                                                                                                                                                                |
|---------|-------------------------------------------------------|---|-------|-------|-------|---|---|--------------------------------------------------------------------------------------------------------------------------------------------------------------------------------------------------------------------------------------------------------------------------------------------------------------------------------|
| nuclear | 210-<br>R_L21_ne<br>wbler_C1                          | G | 0,938 | 0,011 | 0,924 |   |   | GTGGCCTAATAGTATCATAAAACATTGTTAGAAGAATCCTGTACCCTATTAGTATCATGAAA<br>CATTGTTAGAAGAAKTAAGCATGTGGTATCATAGTACATTGWAAGAAAAAGCATGTGGGT<br>AAATGGTAGCATGATACATTGTTATAA[G/T]AATCATGTGGGTCTTATTGTATCATTATATA<br>ATAAGGAG                                                                                                                  |
| nuclear | 404-<br>gi_384575<br>681                              | A | 0,922 | 0,000 | 0,003 | X | X | TCTTGCCATTCTAGTCAGATACCAAAGATGTAAYRYAGCCAAAAATAAACCATCCCWAGAG<br>TAGATCTCAAGAACTTTGATGGCTTTTCTACTGCCATCTTGCAGCTATAACACAGAATTGTA<br>ATGCTATGAAAYTGATATCAAARGG[A/G]AAAGGGAATATAAACATGCCYATGGTAAGAG<br>TGGRAGGACTCCCCTCCACCATGCTGTAGARAGAGAYGATCTTACTACTGTTGGATATCTAA<br>TATTAGAGGCTAGAGCAAATGTAATGCTTGTGTTTGTGACGGTAATACACCTC    |
| nuclear | 409-<br>gi_223026<br>752                              | A | 1,000 | 0,806 | 1,000 |   |   | AAAATAAAYTGTGAAACTAAATGACCAAGCTGGTCGWAGWAACAAATTATTACAGARTM<br>TTKGTTRTTTCAGAAAGRTGTCCTTCMAACATTCGTTGTCGTGATGGAGGTTTTGTTGACC<br>AGAAYTGATAGTATYGTCCWGAYGG[A/G]TCACAGAAGTGCAGGAAGGACAACCTGC<br>AAYCGAWCTGATGCTGAMCAGGAYGATAMTTGTACAAATATGTATGACGAATGGGCCT<br>GTAATGTTTGGGCATCRCAAGGTGAATGTAAGCAAACAARAARTTYATGCTKACCTCMT        |
| nuclear | 417-<br>gi_387154<br>958                              | C | 0,980 | 0,447 | 0,092 |   |   | GTTCAAGATCATTATCWGAATGTTGTCARATYATGGGTTTTGGTCTAAAGACCCTTCAAG<br>RWCRCRCCCAAGCCCAWGAACCTCCAGTTTTGTWAACAAYGAATATCGTGTAGTTGAYCAA<br>GAAARGGGAAGTATTACCTGTCARCCC[A/C]AATGYTKGAATGAAGGATGYGAAATGTATG<br>GTGCTCYGTCCATYGTGGATACTGTCAAAAATGTTTCATGGATTATACCYGWGATTACAAR<br>CGAAATGAAGATGTKGCRGCCAGARTCGRCAGAYAGAAATGGAACCTACWGCACC    |
| nuclear | 419-<br>gi_386354<br>27                               | C | 0,964 | 0,255 | 0,851 |   |   | AAATTAACAAGTGCACGAGGAGGTCGAATATTTCAAATCTCACACGTGGCATTCTTGCT<br>GAACTKACCCATSCTATTGAAAACCTKGSTGCTGAAGAGATTGCTCATTTTGATAAAGTCAGA<br>GTAAACTCTGGASACGCATACCATG[C/T]TGATACTGGAAAATYGTAGCACCAGAAGAAG<br>GMTTCTTTTATTTAGTGTCAATATGCACCAAGARGGACTCCATTTTRGAAATGGCTCTTC<br>ACGTCAACGACCACGATGAAATGATTATTCACGCAGACGCAGAGCATCTWGAA       |
| nuclear | 428-<br>gi_384575<br>681_emb_<br>HE609049<br>_p1650   | G | 1,000 | 0,952 | 0,763 |   |   | ATGGGACAGCCRAGTGTAGTTGAYAGGTTGTTGAATGTTGGAGCYGATCCAACCATGGTTG<br>ACAGAAAAGGCAATTTCCAGCACATCTTGCCATCTTGTAYGGGGCAGAYTCATGTCTTGCC<br>ATTCTAGTCAGATACCAAAGATGTAAY[A/G]YAGCCAAAAATAAACCATCCCWAGAGCTAG<br>ATCTCAAGAACTTTGATGGCTTTTCTACTGCCATCTTGCAGCTATAACACAGAATTGTAATG<br>CTATGAAAYTGATATCAAARGGAAAAGGGAATATAAACATGCCYATGGTAAGAG   |
| nuclear | 429-<br>gi_261362<br>848_gb_Co<br>ntig28358<br>_p4108 | G | 1,000 | 0,995 | 0,837 |   |   | TGTTGGAAGTCTKGTGTTGCTCTGCTAATATAAATGGAWCAATAACAAACTTAAAYRTAATAA<br>GRGGKGACCAAGGARGAGGCTGGCACCTAGGAAARGCATAACATTGGACAGAACTTGGAG<br>CCATCASTTCTCCATTTAGAATGCAACT[G/T]AGTGTCTTCTGCAAGRTCATTTGCARCYTC<br>CACTACARATGATGTTGGWATTGATGATATTTTATTYGTWAACTGTGACCARAATGTAGCA<br>CCACCTAAYATWAGTTGTAACCTTTGATAGTGGAAATGTAAGTGGACYCAAGCTA |

|         |                       |   |       |       |       |   |                                                                                                                                                                                                                                                                                                                                                                                                                                                                                                                                                 |
|---------|-----------------------|---|-------|-------|-------|---|-------------------------------------------------------------------------------------------------------------------------------------------------------------------------------------------------------------------------------------------------------------------------------------------------------------------------------------------------------------------------------------------------------------------------------------------------------------------------------------------------------------------------------------------------|
| nuclear | 505-abyss_C72_3_p2319 | C | 0,838 | 0,261 | 0,058 |   | GTTATTTTAGAATCAAACACAAGAATTCATCATGCAGYCCAGGRTTRGGATGAATTTTCYCTA<br>CCACCCACGCTGACTAATCTCTCGACRAAGCTACGTAACKGACATTRAATGTTTTTTCTAAM<br>GGTTGTGAATGAGGAACTACGTGATAGTTAAGAGCACTAAGTACCATTTGCCGCAGCTCTG<br>GGTTGGTCATCATCATATCAACCCTTTGAACTGTCTGCACTAAGTCAGCAGGATTTATCAT[T,<br>C]GGAAATCGTATCARTTTCATTARTTCTATAGCTTGATCTTCTGGTTACTGTTGAGAAGGA<br>ACCACTCCAYGTTATATGGAAAATGTCRATCTCCTTCAGACCTAATTGATCACTGTTTCAGAC<br>AGTTTACCATTTGTTCAATGTCARTAAATGTAACGTACCYTCCTTGWATATATGCATTAAT<br>TTCTGGCTATAAAAAACATCAATTTGCTTTAATGCATTGTTTCATACTATACAATTTAGCCGT |
| nuclear | 508-soap_C233_1_p1911 | G | 0,924 | 0,488 | 0,098 |   | ATATGTTGGTTCCCTAGCAACAAAAAATATCAAACGTAAGTTAAACAGAGAAGGGACCGG<br>AAACCAGTCAAATAGTCCGAATGAATTAATGGTTTCACTCTTGATAGTTAAACCTAATGAT<br>TGTCATGTTATGCTTATTGAAACAAAAATTGTTGCATTATTTATTTTTAGATGACTT<br>ATCGCTATTGCATTAGTTATATGGTCACTGTTCCAGACAGAAGCGGTGAGAAATAAAGG[<br>A/G]TTATAGCATSTATCTAGAAATAWTTKCACTGTGMTTTTTTCTTTTCGGAARTTGTRC<br>TTTTTTACCAATCAAYGCACCCGAKCCTGTGTYTACYCAGCWWTGCCRCAAACYGTATCT<br>TATATTACTACACAACAGCAATCTTACCGGAACTGGTAATTACATAAAAGCCGGACGTTTCT<br>AAAGAATAATAGAAGATTACCATTTTATCCATACTTATTCTTTCTGTAATGACTGCTACTTT<br>A            |
| nuclear | 607-loc049_id1_314_p3 | C | 0,971 | 0,000 | 0,901 | X | GTCATCTCTGGAGGTGAAGGACTTTGGTGGTAATGTGGCATTGGAACGGATGACCTGCA<br>GGTGGCTGATACCCAGAGGGTGACATAGAGTTTCATATGAAATGGATA[T/C]CCAAGTGATC<br>GTGCATGYTGAGGATTAGAGAATATACTGTCTCCATGTTGTCCCGAATGTGGATGCTTGG<br>TACAGAGAACGGTTAGGGTATGCCGGGTGAGTCATTCCGTG                                                                                                                                                                                                                                                                                                     |
| nuclear | 610-loc094_id1_66_p10 | G | 0,967 | 0,122 | 0,349 | X | TCAGCAACCTCAAGTTGCCATCCCTGCAGGAATGGGCCAGTATGCACCGTTTTACCTACTG<br>TTGCCCTCCGCKGCCCATCAGAGTCCACGACATGTCCA[A/G]TAYACGACMCACCCAMT<br>GCCAGCTCATGTTTACAGATTTTACAGAGCTCCACCATACCGGCAGTACAGTATCAGCCAC<br>AGTTAGCTTACAATATGGTGGTCTTG                                                                                                                                                                                                                                                                                                                    |
| nuclear | 617-loc359_id5_887_p8 | T | 1,000 | 0,000 | 0,702 |   | ATAGACAGGAATGTYTWAAAGAATGGTATACAATGTGTAAAGAGAGAAAYAT[T/C]CCAGT<br>ATCTGAAAACCTTYTCCCTGCAGGCTACTCTAGGTAACCTGTCAAATCAGAGATTGGCAGA<br>TAGCTGGGCTGCCAGTGGACAACACTACTTTT                                                                                                                                                                                                                                                                                                                                                                             |
| nuclear | 701-C116849_p267      | T | 1,000 | 0,563 | 0,869 |   | TGAAGGGGCTGATAGAATTGAAATGGTGTCTCGATGCGGCRAGGCAAATGAAACGGAATCA<br>TGGRITCCACGACGGKCGCCARTGTATAAARCTATTGGACAAATTTCCGGAAATAGAGCTA<br>ATTTGGAACACTTTGAACAATCTAGAGC[A/T]TCATCTGCAGACCGTTTTGAAAGTAGRCAA<br>AGAGGTGTWATGAACGAGTTYCCACCTCGWCTGACAAATGGAATTCACAACAGACCGGAA<br>RAAAATATTGTTGAACATTCWAGGGGACACATTTTCCCGGTGTCTGTTAAYCGTTCAG                                                                                                                                                                                                                 |
| nuclear | 801-C6813_GA_36C_p732 | C | 0,989 | 0,000 | 0,193 | X | GCTCGAGAATTTGTGAGAAGAAGTATAAGACGTATGTCTGGCAGAMGAGGTAAGRATTCR<br>GAAGAAACGAAAGACTGTAGYATTTTACCAAARGATACTGACG[C/T]TRGTGTTGGACA<br>AGTTAATTTAGCYTTTGACGATGCTGGWAAAACCTGGTTTTGAYAGACAGAATTCAGAATACT                                                                                                                                                                                                                                                                                                                                                 |

|                |                                   |   |       |       |       |  |          |                                                                                                                                                                                                                                                   |
|----------------|-----------------------------------|---|-------|-------|-------|--|----------|---------------------------------------------------------------------------------------------------------------------------------------------------------------------------------------------------------------------------------------------------|
|                |                                   |   |       |       |       |  |          | ACAACCTTATCTGCAGGGGACAACGCCGTCGTGTCTGGTCAGACTACTAAATATTCCGTTAAT<br>AATTCTCAATACCC                                                                                                                                                                 |
| <b>nuclear</b> | 802-<br>C9777_GA<br>36C_p108<br>6 | C | 0,957 | 0,000 | 0,125 |  | <b>X</b> | GATCGTGTTTACAAACCGATCGTAAAAATGGAAGATAAAAAACAATAATGAGCAAGTTGTTCCAGACGTTTCYATGCCATCTTGCTATCTWACACCAGA[C/T]GCATCACCAGTATCATCTCCYCARCCATCAAACGATGCCTCTTCAAAGGACATMCATTCRTTAAATCCAGTWTTAGTKGCAAA<br>GTATATTTGTTGCTRAAGCAGAAACAAATGAATGACACTAATGCT      |
| <b>nuclear</b> | 803-<br>C22777_G<br>A36A_p30<br>0 | T | 0,990 | 0,047 | 0,206 |  | <b>X</b> | GAAACCATTCCAATTTTTAAARAAKTACAAGAATCCATGTTGGCATGAACCTTTATACACCACRAATGTTTATCAGARCAATAAATACAGTTTACTGTCACCRAATGTTGTTAGCACCAT[C/T]ATTCGTTTTRATGACMGAATGGAGCACACGACTTACAAGGGACCAAAYACCYCAAAGACTWAG<br>ATGTTTACCGTATTTCTTATAATGGACARCCGAAATGTGGAAGTACTGA |

**Table S3: Results of additional diagnosis methods. Pop: population. N: number of individuals. Unchim: diagnosed as non-chimeric. NMt-Chim: diagnosed as non-*trossulus* chimeric (not due to cancer). Mt-Chim: diagnosed as *trossulus* chimeric (transmissible cancer, MtrBTN2). DN-type: cell type described in results section. NP: not performed.**

|                          | Pop      | N       | Genetics   | Histology  |          |          | Cytology   | Flow cytometry      | Methods                   |
|--------------------------|----------|---------|------------|------------|----------|----------|------------|---------------------|---------------------------|
|                          |          |         | Diagnostic | Diagnostic | DN-type  | Stage    | Diagnostic | Diagnostic          |                           |
| BEFORE GENETIC DIAGNOSIS | L2       | 21      | Unchim     | -          |          |          | NP         | NP                  | see method section        |
|                          | L3       | 27      | Unchim     | -          |          |          | NP         | NP                  | see method section        |
|                          | L5       | 1       | NMt-Chim   | -          |          |          | NP         | NP                  | see method section        |
|                          | L6       | 37      | Unchim     | -          |          |          | NP         | NP                  | see method section        |
|                          |          | 1       | Unchim     | +          | typeB    | light    | NP         | NP                  |                           |
|                          |          | 6       | Unchim     | +          | typeB    | moderate | NP         | NP                  |                           |
|                          |          | 1       | Unchim     | +          | typeB    | heavy    | NP         | NP                  |                           |
|                          | L9       | 1       | Mt-Chim    | +          | typeA    | heavy    | NP         | NP                  | see method section        |
|                          |          | 1       | NMt-Chim   | -          |          |          | NP         | NP                  |                           |
|                          |          | 28      | Unchim     | -          |          |          | NP         | NP                  |                           |
|                          | L1       | 2       | NMt-Chim   | -          |          |          | NP         | NP                  | see method section        |
|                          |          | 19      | Unchim     | -          |          |          | NP         | NP                  |                           |
|                          | L10      | 38      | Unchim     | -          |          |          | NP         | NP                  | see method section        |
| L11                      | 1        | Mt-Chim | +          | typeA      | heavy    | NP       | NP         | see method section  |                           |
| L13                      | 38       | Unchim  | -          |            |          | NP       | NP         | see method section  |                           |
| AFTER GENETIC DIAGNOSIS  | Arc      | 1       | Mt-Chim    | NP         | NP       | NP       | NP         | +                   | Benabdelmouna et al. 2018 |
|                          | CamaretA | 1       | NMt-Chim   | +          | NP       | moderate | +          | NP                  | Burioli et al. 2019       |
|                          | CamaretB | 1       | Mt-Chim    | NP         | NP       | NP       | +          | +                   | Burioli et al. 2019       |
|                          | Brv      | 3       | Mt-Chim    | NP         | NP       | NP       | NP         | +                   | Benabdelmouna et al. 2018 |
|                          | L18      | 1       | Mt-Chim    | +          | typeA    | light    | NP         | NP                  | see method section        |
|                          |          | 4       | NMt-Chim   | -          |          |          | NP         | NP                  |                           |
|                          | L19      | 1       | Mt-Chim    | +          | typeA    | heavy    | NP         | NP                  | see method section        |
|                          | L20      | 1       | Mt-Chim    | +          | typeA    | heavy    | NP         | NP                  | see method section        |
|                          | LAN-VIV  | 1       | Mt-Chim    | +          | NP       | moderate | +          | NP                  | Burioli et al. 2019       |
|                          | Pal      | 1       | Mt-Chim    | NP         | NP       | NP       | NP         | +                   | Benabdelmouna et al. 2018 |
|                          | STBRI    | 1       | Mt-Chim    | +          | NP       | heavy    | +          | +                   | Burioli et al. 2019       |
| 1                        |          | Mt-Chim | +          | NP         | moderate | +        | +          | Burioli et al. 2019 |                           |



1 ==> Figure S1 = pdf document (76 pages)

2 **Figure S1: Graphical inference of the 6 MtrBTN2 tumors genotypes at 76 SNPs.** (A)  
3 KASP fluorescence data plot where genotypes are indicated by colored points. (B)  
4 Correlation plot between  $y'_i$  fluorescence signal and MtFF2 (*M. trossulus* fluorescence  
5 fraction 2, proxy of the proportion of cancerous cell in the sample). *M. edulis* samples are  
6 represented in red (MtFF2 value close to 0) and *M. trossulus* samples are represented in  
7 yellow (MtFF2 value close to 1). In both panels, the 6 tumors are represented in black:  
8 triangle filled correspond to hemolymph samples and open triangle to mantle/gill samples  
9 (samples from the same individual are related by a pointed line).

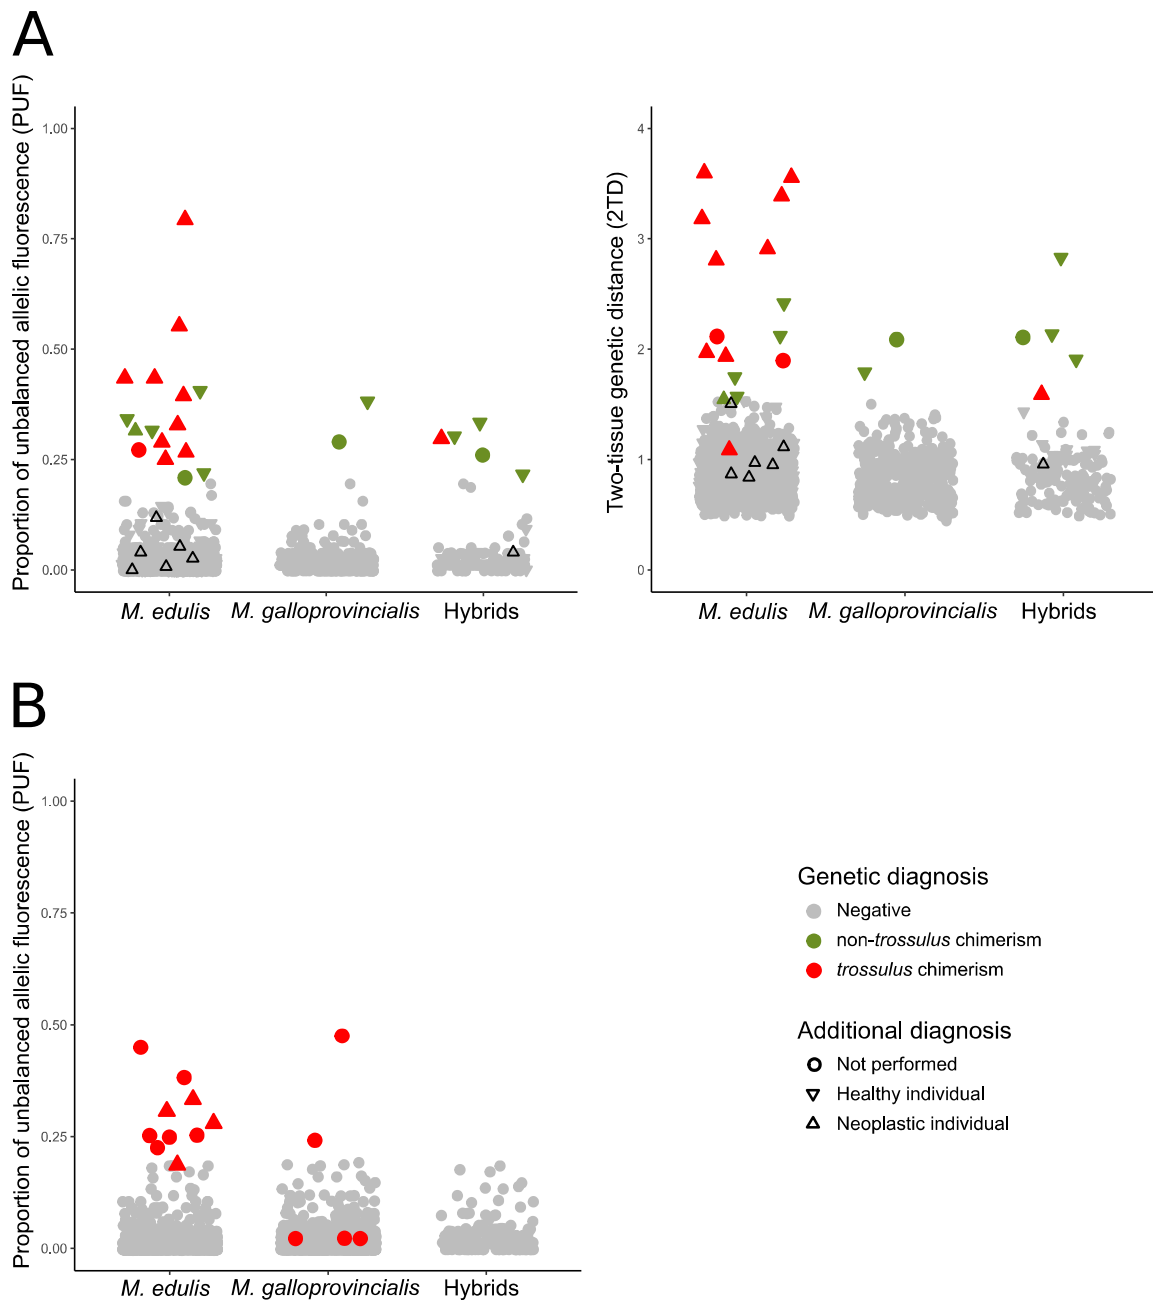

10

11 **Figure S2: Proportion of unbalanced allelic Fluorescence (PUF) and two-tissue genetic**  
 12 **distance (2TD) used for genetic diagnosis. (A)** PUF (left) and 2TD (right) values for  
 13 individuals sampled at two tissues. Color corresponds to genetic diagnosis: red for *trossulus*  
 14 chimeric individuals (positive to MtF, PUF and mostly 2TD), green for non-*trossulus*  
 15 chimeric individuals (positive to PUF and 2TD indexes) and grey for non-chimeric  
 16 individuals (negative to all indexes). The symbol form corresponds to phenotypic diagnosis:  
 17 triangle pointing up for neoplastic individuals, triangle pointing down for healthy individuals  
 18 and dot for a not performed phenotype diagnosis. Black triangles pointing up represent  
 19 neoplastic individuals of type B which are not chimeric (negative to all indexes). **(B)** PUF  
 20 values for single-sampled individuals. Color corresponds to genetic diagnosis: red for  
 21 *trossulus* chimerism (positive to MtFF) and non-chimeric individuals (negative to MtFF). The  
 22 symbol form corresponds to phenotypic diagnosis: triangle pointing up for neoplastic  
 23 individuals, triangle pointing down for healthy individuals and dot for a not performed  
 24 phenotype diagnosis.

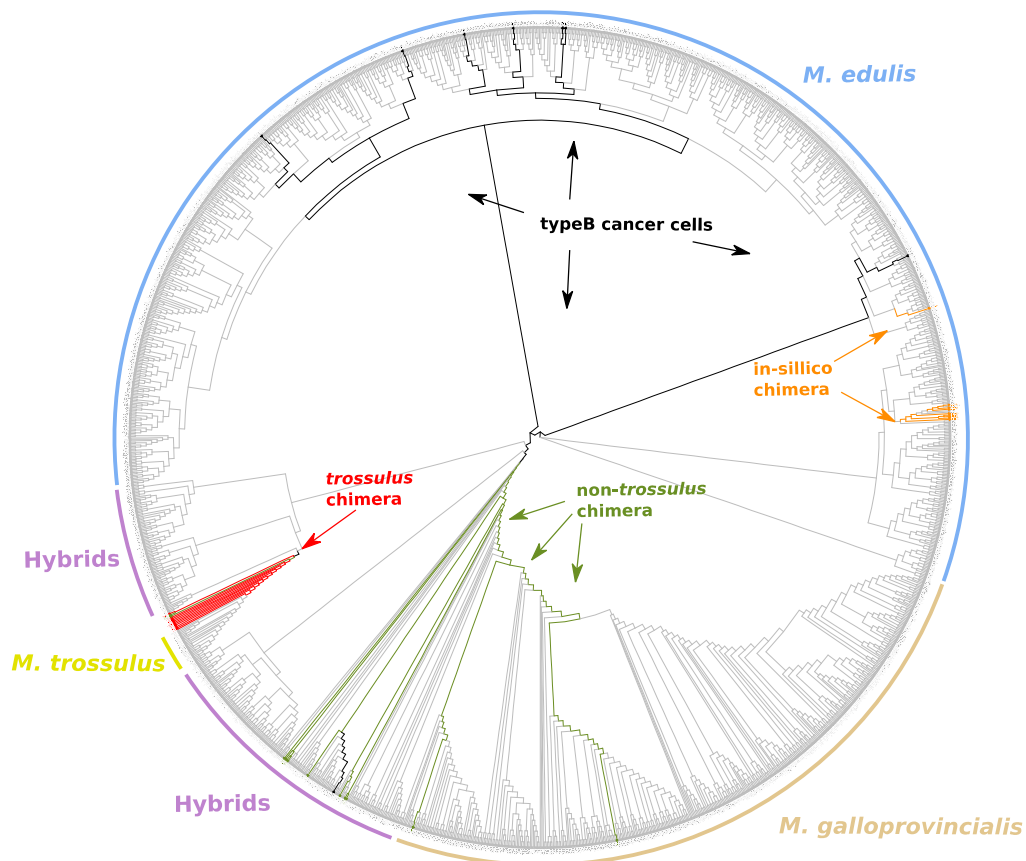

25

26 **Figure S3: Neighbor-joining Tree estimated on all SNPs fluorescence values ( $\gamma'$ ).** Color  
 27 **corresponds to genetic diagnosis:** red for *trossulus* chimerism (MtrBTN2), green for non-  
 28 *trossulus* chimerism, grey for non-chimeric individuals and black for non-chimeric  
 29 individuals with neoplastic type B cells. Orange branch corresponds to in silico chimera  
 30 generated by mixing one sample (“cancer”) with 9 others samples (“hosts”) at 40%, 60% or  
 31 80% (3 of each).

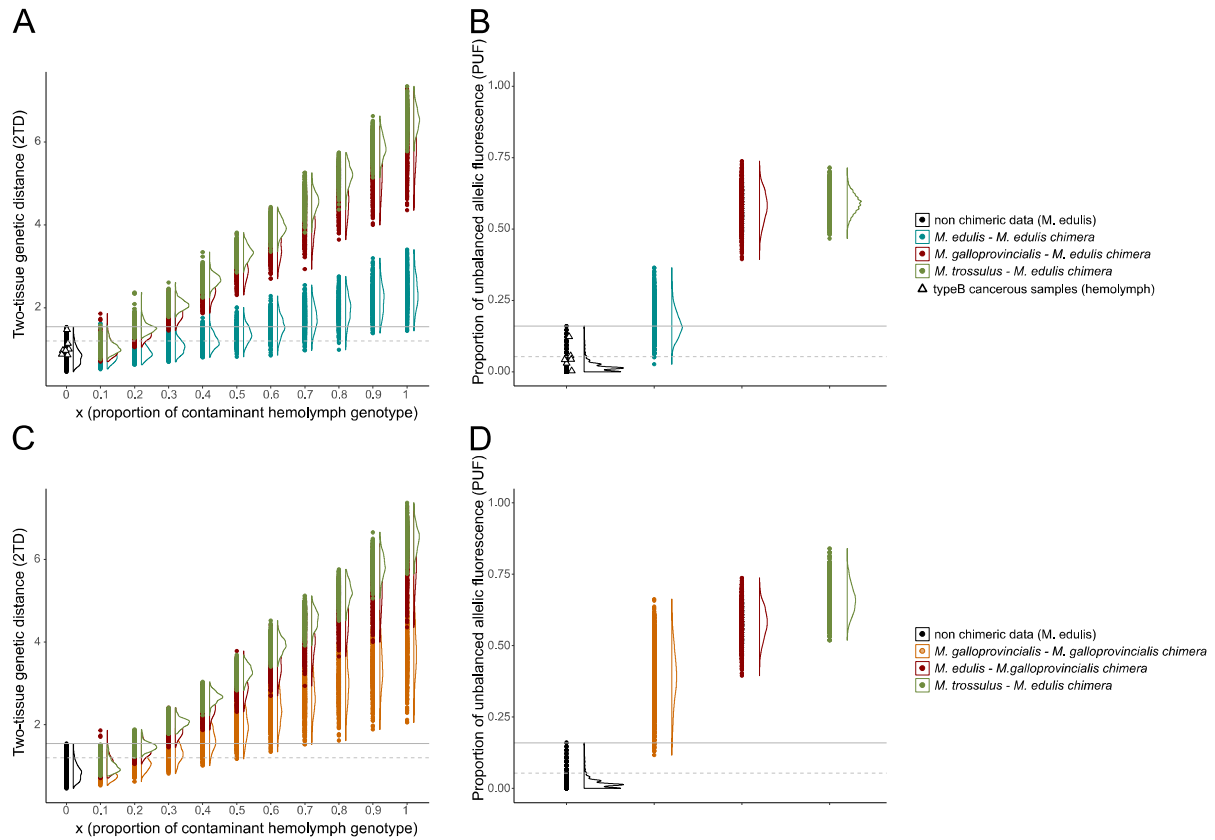

32

33 **Figure S4: PUF and 2TD estimation of in silico chimera.** Panels (A) and (B) correspond to  
 34 PUF and 2TD values (respectively) estimated for in silico chimera in *M. edulis* « hosts »,  
 35 while panels (C) and (D) correspond to PUF and 2TD values (respectively) estimated for in-  
 36 silico chimera in *M. galloprovincialis* « hosts ». Colored circles correspond to intraspecific  
 37 (blue and orange circles) and interspecific (green and red circles) mixed genotypes, black  
 38 circles corresponds to non-chimeric mussels performed of this study and typeB cancerous  
 39 samples are reported by black triangle. Curves indicate the distribution of values and grey  
 40 lines correspond to the maximum (continuous line) and percentile 95% (dotted line) of PUF  
 41 and 2TD in non-chimeric individuals.

42

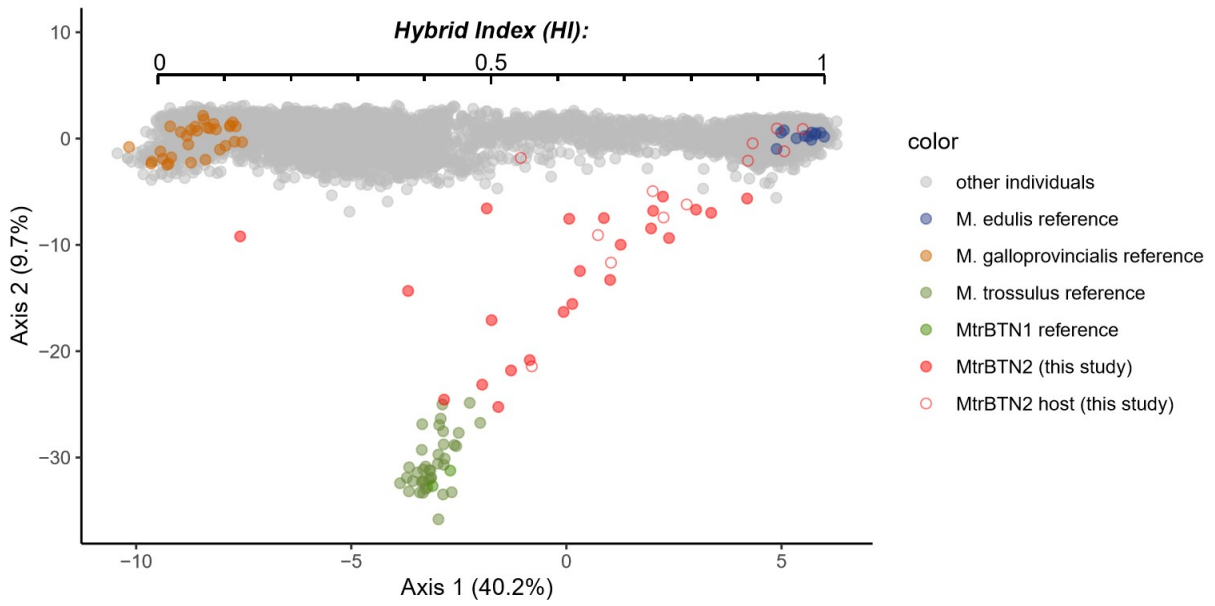

43

44 **Figure S5: Mussels classification as *M. edulis*, *M. galloprovincialis* or hybrid.** PCA on all  
 45 SNP  $y'_i$  values (VAFF). The first axis discriminates *M. edulis* (blue) from *M.*  
 46 *galloprovincialis* (orange). We use it to infer a hybrid index and assign the European mussels  
 47 to *M. edulis* (HI>0.85), *M. galloprovincialis* (HI< 0.4) or hybrids (0.4< HI<0.85) genetic  
 48 backgrounds.

49

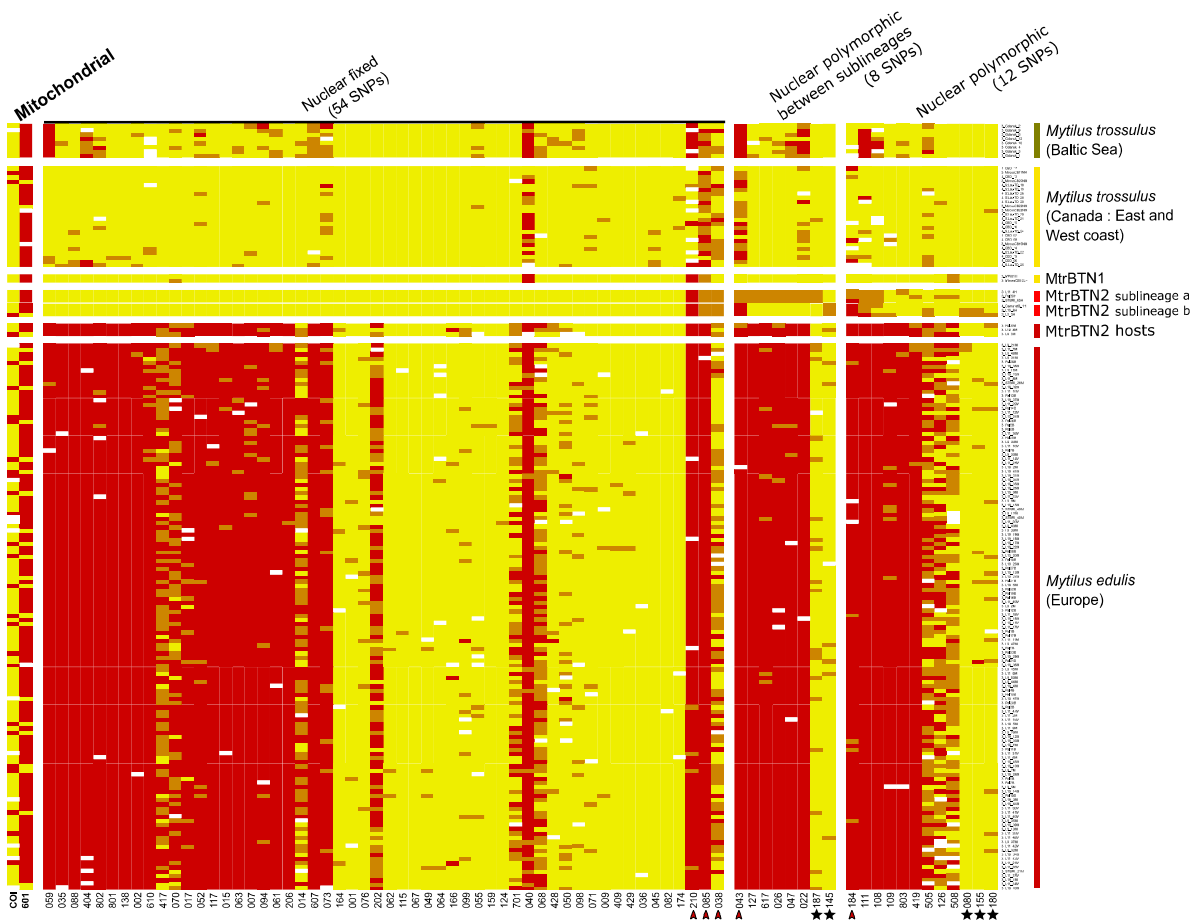

50

51 **Figure S6: Plot of genotypes for all mitochondrial and nuclear SNPs** in column and  
52 individuals in rows. Red: homozygote of *edulis*-state allele; yellow: homozygote of *trossulus*-  
53 state allele; orange: heterozygote. The first two columns correspond to mitochondrial SNPs,  
54 the twelve next to a subset of nuclear SNPs fixed in the 6 MtrBTN2 tumors, then eight SNPs  
55 fixed between the two sublineages and then 12 SNPs revealing polymorphism within each  
56 sublineages. Red arrowhead pointed the five SNPs with *M. edulis*-state allele excess in the 6  
57 tumors. Black star highlights the five SNPs for which *M.edulis*-state allele in tumors are not  
58 explained by the null allele hypothesis.

59
